# Supplementary material for: Prediction of the enantiomeric excess value for asymmetric transfer hydrogenation based on machine learning
Source: Royal Society of Chemistry journal article supplement (doi:10.1039/d2qo01680j), 2023-01-01
Supplement: d2qo01680j1.xlsx [file d2qo01680j1.xlsx]

## Sheet: Dataset_tol
Reactions_Number	Temperature	S_C	H_logP	H_TPSA	Atom1 NBO charge	Atom3 NBO charge	Atom4 NBO charge	C=O/C=N Vibration Frequency	Sterimol L1	Sterimol Bmin1	Sterimol Bmax1	Sterimol L2	Sterimol Bmin2	Sterimol Bmax2	C_Di_HA	Bite_Anger	C_BL1	C_BL2	Ph_distance	N_Q1	N_Q2	M_Q	%V_bur	Ee
R11_11_Cat05_T298	298	200	0.17	27.57	-0.599	-0.21	-0.221	1780.96	11.5166	1.97191	4.64355	6.08023	1.7	6.03989	39.9	77.32	2.1668	2.15103	1.74	-0.834	-0.553	0.033	0.792	0
R11_21_Cat05_T298	298	200	0.17	27.57	-0.604	-0.209	-0.221	1772.22	8.20512	2.64865	4.79715	6.05653	1.7	6.04148	39.9	77.32	2.1668	2.15103	1.74	-0.834	-0.553	0.033	0.792	0
R11_09_Cat05_T298	298	200	0.17	27.57	-0.597	-0.21	-0.222	1782.04	7.32071	1.7	6.04427	6.08142	1.7	6.04004	39.9	77.32	2.1668	2.15103	1.74	-0.834	-0.553	0.033	0.792	6
R11_08_Cat05_T298	298	200	0.17	27.57	-0.6	-0.209	-0.221	1780.31	9.06189	1.82	4.78682	6.06467	1.7	6.04085	39.9	77.32	2.1668	2.15103	1.74	-0.834	-0.553	0.033	0.792	7
R11_10_Cat05_T298	298	200	0.17	27.57	-0.598	-0.209	-0.222	1783.32	9.06201	1.8206	4.78649	7.31989	1.7	6.04369	39.9	77.32	2.1668	2.15103	1.74	-0.834	-0.553	0.033	0.792	12
R11_12_Cat05_T298	298	200	0.17	27.57	-0.611	-0.205	-0.209	1778.51	6.11093	1.95493	6.80776	5.24362	1.7	3.95361	39.9	77.32	2.1668	2.15103	1.74	-0.834	-0.553	0.033	0.792	16
R11_19_Cat05_T298	298	200	0.17	27.57	-0.596	-0.21	-0.221	1783.43	6.08833	1.7	6.0508	6.07785	1.7	6.03989	39.9	77.32	2.1668	2.15103	1.74	-0.834	-0.553	0.033	0.792	21
R10_04_Cat05_T300	300	100	0.17	27.57	-0.577	0.619	-0.178	1723.66	6.23976	1.7	6.04749	5.92937	1.7	3.48528	40.8	77.14	2.15921	2.15291	1.74	-0.83	-0.553	0.027	0.794	24.6
R15_01_Cat08_T273_03	273	200	0.17	27.57	-0.561	-0.167	-0.24	1759.02	6.7877	2.92586	5.49335	3.47169	1.7	4.96024	39.81	75.53	2.14825	2.17778	1.73	-0.875	-0.57	0.053	0.803	25
R11_04_Cat05_T298	298	200	0.17	27.57	-0.606	-0.204	-0.22	1775.87	9.05782	1.81656	4.78433	5.24722	1.7	3.95879	39.9	77.32	2.1668	2.15103	1.74	-0.834	-0.553	0.033	0.792	27
R11_22_Cat05_T298	298	200	0.17	27.57	-0.595	-0.21	-0.217	1785.95	6.0804	1.7	6.03988	3.69361	1.7	7.39119	39.9	77.32	2.1668	2.15103	1.74	-0.834	-0.553	0.033	0.792	27
R11_23_Cat05_T298	298	200	0.17	27.57	-0.596	-0.21	-0.223	1783.3	7.54688	1.7	6.49827	7.54688	1.7	6.49827	39.9	77.32	2.1668	2.15103	1.74	-0.834	-0.553	0.033	0.792	28
R11_24_Cat05_T298	298	200	0.17	27.57	-0.597	-0.21	-0.223	1782.68	6.06563	1.7	7.46796	6.07997	1.7	6.03941	39.9	77.32	2.1668	2.15103	1.74	-0.834	-0.553	0.033	0.792	28
R15_01_Cat08_T273_02	273	200	0.17	27.57	-0.561	-0.167	-0.24	1759.02	6.7877	2.92586	5.49335	3.47169	1.7	4.96024	40.81	78.9	2.15507	2.12024	1.74	-0.85	-0.732	0.008	0.745	28
R10_07_Cat05_T300	300	100	0.17	27.57	-0.539	0.606	-0.164	1767.09	8.33223	1.7	4.02815	4.49375	1.7	4.96693	40.8	77.14	2.15921	2.15291	1.74	-0.83	-0.553	0.027	0.794	29.5
R11_01_Cat05_T298	298	200	0.17	27.57	-0.606	-0.205	-0.221	1776.53	6.06881	1.7	6.04046	3.83762	1.7	2.87316	39.9	77.32	2.1668	2.15103	1.74	-0.834	-0.553	0.033	0.792	30
R11_07_Cat05_T298	298	200	0.17	27.57	-0.605	-0.203	-0.22	1777.06	9.0583	1.82103	4.78418	6.55934	1.74461	3.4096	39.9	77.32	2.1668	2.15103	1.74	-0.834	-0.553	0.033	0.792	31
R11_14_Cat05_T298	298	200	0.17	27.57	-0.604	-0.206	-0.218	1770.57	9.03717	1.81416	4.79633	6.79109	1.7	6.03667	39.9	77.32	2.1668	2.15103	1.74	-0.834	-0.553	0.033	0.792	33
R10_05_Cat05_T300	300	100	0.17	27.57	-0.589	0.622	-0.199	1714.4	6.24133	1.7	6.04764	6.88944	1.7	4.01964	40.8	77.14	2.15921	2.15291	1.74	-0.83	-0.553	0.027	0.794	34.9
R15_01_Cat08_T273_04	273	200	0.17	27.57	-0.561	-0.167	-0.24	1759.02	6.7877	2.92586	5.49335	3.47169	1.7	4.96024	40.8	77.14	2.15921	2.15291	1.74	-0.846	-0.553	0.023	0.794	36
R11_06_Cat05_T298	298	200	0.17	27.57	-0.605	-0.203	-0.221	1777.87	6.06531	1.7	6.04053	6.55954	1.74349	3.4081	39.9	77.32	2.1668	2.15103	1.74	-0.834	-0.553	0.033	0.792	37
R11_03_Cat05_T298	298	200	0.17	27.57	-0.606	-0.204	-0.221	1775.94	6.06646	1.7	6.04071	5.24541	1.7	3.95774	39.9	77.32	2.1668	2.15103	1.74	-0.834	-0.553	0.033	0.792	39
R11_02_Cat05_T298	298	200	0.17	27.57	-0.606	-0.202	-0.221	1775.5	6.06978	1.7	6.04063	7.93614	1.7	3.45654	39.9	77.32	2.1668	2.15103	1.74	-0.834	-0.553	0.033	0.792	41
R14_16_Cat05_T298	298	100	0.17	27.57	-0.578	-0.13	-0.309	1713.53	5.23772	1.7	7.68995	6.29908	1.7	6.04091	40.8	79.18	2.14419	2.11169	1.74	-0.83	-0.553	0.027	0.794	41
R11_13_Cat05_T298	298	200	0.17	27.57	-0.603	-0.194	-0.225	1783.32	6.96615	1.7	5.8139	6.04855	1.7	6.04142	39.9	77.32	2.1668	2.15103	1.74	-0.834	-0.553	0.033	0.792	42
R10_01_Cat05_T300	300	100	0.17	27.57	-0.57	0.618	-0.168	1729.44	6.23833	1.7	6.04782	3.43308	1.7	4.96423	40.8	77.14	2.15921	2.15291	1.74	-0.83	-0.553	0.027	0.794	43.6
R10_03_Cat05_T300	300	100	0.17	27.57	-0.566	0.617	-0.167	1731.15	6.23651	1.7	6.04771	3.44309	1.7	6.27388	40.8	77.14	2.15921	2.15291	1.74	-0.83	-0.553	0.027	0.794	45.4
R11_05_Cat05_T298	298	200	0.17	27.57	-0.613	-0.206	-0.229	1770.5	6.22951	1.89335	6.96436	6.05276	1.7	6.03796	39.9	77.32	2.1668	2.15103	1.74	-0.834	-0.553	0.033	0.792	46
R11_16_Cat05_T298	298	200	0.17	27.57	-0.597	-0.21	-0.216	1781.79	10.3108	1.7	6.33875	6.07923	1.7	6.03938	39.9	77.32	2.1668	2.15103	1.74	-0.834	-0.553	0.033	0.792	46
R10_10_Cat05_T300	300	100	0.17	27.57	-0.509	0.601	-0.166	1796.81	8.33727	1.7	3.74414	4.50509	1.74079	4.43271	40.8	77.14	2.15921	2.15291	1.74	-0.83	-0.553	0.027	0.794	50
R11_25_Cat05_T298	298	200	0.17	27.57	-0.595	-0.21	-0.221	1783.09	6.08601	1.7	6.93564	6.0807	1.7	6.03999	39.9	77.32	2.1668	2.15103	1.74	-0.834	-0.553	0.033	0.792	50
R10_02_Cat05_T300	300	100	0.17	27.57	-0.573	0.619	-0.182	1727.26	7.88042	1.7	6.03801	3.43464	1.7	5.57442	40.8	77.14	2.15921	2.15291	1.74	-0.83	-0.553	0.027	0.794	52.04
R11_18_Cat05_T298	298	200	0.17	27.57	-0.603	-0.204	-0.222	1779.03	6.08889	1.7	6.05501	5.24781	1.7	3.95822	39.9	77.32	2.1668	2.15103	1.74	-0.834	-0.553	0.033	0.792	59
R16_01_Cat06_T313_02	313	20	0.17	27.57	-0.662	-0.315	-0.359	1646.29	3.87626	1.7	7.26205	3.32083	1.7	3.3117	40.6	74.85	2.15734	2.17588	1.73	-0.875	-0.57	0.042	0.809	60
R16_01_Cat04_T313_03	313	20	0.17	27.57	-0.662	-0.315	-0.359	1646.29	3.87626	1.7	7.26205	3.32083	1.7	3.3117	41.7	78.69	2.19256	2.17619	1.74	-0.865	-0.738	0.031	0.782	61
R11_17_Cat05_T298	298	200	0.17	27.57	-0.605	-0.202	-0.22	1775.04	10.2956	1.7	6.3037	6.79381	1.83363	6.1345	39.9	77.32	2.1668	2.15103	1.74	-0.834	-0.553	0.033	0.792	65
R18_05_Cat11_T293	293	200	0.17	27.57	-0.708	-0.112	-0.514	1607.8	4.51903	2.17044	4.59616	5.47506	1.81474	3.0976	47.9	78.98	2.15993	2.12513	1.91	-0.882	-0.774	-0.22	0.794	67
R11_15_Cat05_T298	298	200	0.17	27.57	-0.605	-0.204	-0.216	1776.8	10.3118	1.7	6.34921	5.24474	1.7	3.95706	39.9	77.32	2.1668	2.15103	1.74	-0.834	-0.553	0.033	0.792	68
R18_04_Cat11_T293	293	200	0.17	27.57	-0.702	-0.116	-0.742	1614.16	4.51823	2.17233	4.59813	2.18561	1.7	2.13648	47.9	78.98	2.15993	2.12513	1.91	-0.882	-0.774	-0.22	0.794	68
R04_02_Cat05_T301	301	200	0.17	27.57	-0.634	-0.351	-0.791	1735.49	3.54129	1.7	5.03055	2.18651	1.7	2.13372	39.9	77.32	2.16677	2.15106	1.74	-0.834	-0.553	0.033	0.792	69
R03_11_Cat04_T303	303	100	0.17	27.57	-0.536	-0.172	-0.217	1752.14	6.55281	1.7	3.82535	3.43343	1.7	4.96383	41.4	78.61	2.15133	2.13191	1.74	-0.843	-0.741	0.025	0.783	70
R14_06_Cat05_T298	298	100	0.17	27.57	-0.564	-0.131	-0.135	1741.24	5.18813	1.7	7.68792	3.42706	1.7	6.38714	40.8	79.18	2.14419	2.11169	1.74	-0.83	-0.553	0.027	0.794	70
R16_07_Cat10_T313	313	20	0.17	27.57	-0.668	-0.325	-0.35	1654.69	6.67632	1.7	7.37163	3.32114	1.7	3.31144	42.7	78.41	2.17674	2.13292	1.74	-0.85	-0.74	0.028	0.784	70
R03_12_Cat04_T303	303	100	0.17	27.57	-0.553	-0.203	-0.213	1736.15	6.88752	1.7	4.01966	6.55684	1.7	3.82105	41.4	78.61	2.15133	2.13191	1.74	-0.843	-0.741	0.025	0.783	71
R04_02_Cat05_T287	287	200	0.17	27.57	-0.634	-0.351	-0.791	1735.18	3.54125	1.7	5.03053	2.18651	1.7	2.13372	39.9	77.31	2.16696	2.151	1.74	-0.834	-0.553	0.033	0.792	72
R16_01_Cat04_T313_08	313	20	0.17	27.57	-0.662	-0.315	-0.359	1646.29	3.87626	1.7	7.26205	3.32083	1.7	3.3117	43.2	77.84	2.15765	2.13152	1.74	-0.859	-0.743	0.014	0.789	73
R16_20_Cat10_T313	313	20	0.17	27.57	-0.67	-0.331	-0.357	1635.46	9.41904	1.7	3.98661	3.32109	1.7	3.31163	42.7	78.41	2.17674	2.13292	1.74	-0.85	-0.74	0.028	0.784	73
R16_12_Cat10_T313	313	20	0.17	27.57	-0.663	-0.317	-0.359	1649.73	7.28929	1.7	5.97402	3.31987	1.7	3.31228	42.7	78.41	2.17674	2.13292	1.74	-0.85	-0.74	0.028	0.784	74
R16_21_Cat10_T313	313	20	0.17	27.57	-0.671	-0.332	-0.357	1632.84	7.25929	1.7	7.63924	3.32128	1.7	3.31153	42.7	78.41	2.17674	2.13292	1.74	-0.85	-0.74	0.028	0.784	74
R06_15_Cat06_T303	303	100	0.17	27.57	-0.619	-0.149	-0.154	1682.76	4.70678	1.7	6.28065	3.44364	1.7	4.96043	40.6	74.86	2.15724	2.17605	1.73	-0.875	-0.57	0.042	0.809	76
R06_17_Cat06_T303	303	100	0.17	27.57	-0.619	-0.147	-0.153	1684.08	3.42422	1.7	6.39441	3.44345	1.7	4.95945	40.6	74.86	2.15724	2.17605	1.73	-0.875	-0.57	0.042	0.809	76
R17_02_Cat08_T298	298	100	0.17	27.57	-0.598	0.631	-0.324	1560.48	8.25299	1.7	6.5258	3.91014	1.7	3.66539	48.7	79.18	2.14419	2.11169	1.85	-0.897	-0.576	0.237	0.819	76
R04_06_Cat05_T313	313	200	0.17	27.57	-0.622	-0.132	-0.156	1700	3.47386	1.7	4.97013	3.30575	1.7	3.24784	39.9	77.31	2.16664	2.15112	1.74	-0.834	-0.553	0.033	0.792	77
R06_16_Cat06_T303	303	100	0.17	27.57	-0.612	-0.132	-0.156	1686.23	4.03292	1.7	5.57689	3.44226	1.7	4.96134	40.6	74.86	2.15724	2.17605	1.73	-0.875	-0.57	0.042	0.809	77
R13_01_Cat05_T298	298	67	0.17	27.57	-0.544	0.618	-0.648	1803.15	7.89962	1.7	6.0029	7.61497	1.98587	5.56053	40.8	79.18	2.14419	2.11169	1.74	-0.83	-0.553	0.027	0.794	77
R13_06_Cat05_T298	298	67	0.17	27.57	-0.544	0.615	-0.648	1807.18	7.89393	1.7	6.00569	6.13029	2.35807	3.72791	40.8	79.18	2.14419	2.11169	1.74	-0.83	-0.553	0.027	0.794	77
R16_01_Cat04_T313_05	313	20	0.17	27.57	-0.662	-0.315	-0.359	1646.29	3.87626	1.7	7.26205	3.32083	1.7	3.3117	42.8	78.13	2.15219	2.13186	1.74	-0.862	-0.741	0.016	0.787	77
R16_01_Cat04_T313_07	313	20	0.17	27.57	-0.662	-0.315	-0.359	1646.29	3.87626	1.7	7.26205	3.32083	1.7	3.3117	42.9	78.2	2.13749	2.12933	1.74	-0.865	-0.74	0.019	0.79	77
R16_02_Cat10_T313	313	20	0.17	27.57	-0.659	-0.311	-0.36	1648.89	3.72314	1.7	7.35945	3.32057	1.7	3.31158	42.7	78.41	2.17674	2.13292	1.74	-0.85	-0.74	0.028	0.784	77
R17_01_Cat08_T298	298	100	0.17	27.57	-0.596	0.633	-0.319	1560.1	6.52616	1.7	7.28	3.91816	1.7	3.66523	48.7	79.18	2.14419	2.11169	1.85	-0.897	-0.576	0.237	0.819	77
R21_01_Cat04_T298_01	298	100	0.17	27.57	-0.543	-0.164	-0.439	1775.83	3.46157	1.7	4.96089	3.27123	1.7	4.16105	41.4	78.6	2.15133	2.13191	1.74	-0.854	-0.743	0.025	0.783	77
R10_11_Cat05_T300	300	100	0.17	27.57	-0.565	0.622	-0.182	1736.23	8.33773	1.7	4.05303	6.14984	1.7	4.6586	40.8	77.14	2.15921	2.15291	1.74	-0.83	-0.553	0.027	0.794	77.9
R04_07_Cat05_T313	313	200	0.17	27.57	-0.653	-0.153	-0.36	1685.64	3.43485	1.7	4.96838	3.32176	1.7	3.31121	39.9	77.31	2.16664	2.15112	1.74	-0.834	-0.553	0.033	0.792	78
R04_08_Cat05_T313	313	200	0.17	27.57	-0.628	-0.161	-0.354	1708.7	3.43289	1.7	4.96764	3.29017	1.7	4.48106	39.9	77.31	2.16664	2.15112	1.74	-0.834	-0.553	0.033	0.792	78
R16_17_Cat10_T313	313	20	0.17	27.57	-0.647	-0.288	-0.361	1661.45	4.07596	1.7	8.92357	3.31995	1.7	3.3119	42.7	78.41	2.17674	2.13292	1.74	-0.85	-0.74	0.028	0.784	78
R16_18_Cat10_T313	313	20	0.17	27.57	-0.665	-0.322	-0.358	1643.22	8.34694	1.7	4.07397	3.32117	1.7	3.31175	42.7	78.41	2.17674	2.13292	1.74	-0.85	-0.74	0.028	0.784	78
R16_22_Cat10_T313	313	20	0.17	27.57	-0.666	-0.323	-0.358	1637.37	9.41832	1.7	5.5364	3.32006	1.7	3.31222	42.7	78.41	2.17674	2.13292	1.74	-0.85	-0.74	0.028	0.784	78
R06_24_Cat06_T303	303	100	0.17	27.57	-0.632	-0.144	-0.186	1676.3	6.88597	1.7	4.02276	3.42511	1.7	6.39602	40.6	74.86	2.15724	2.17605	1.73	-0.875	-0.57	0.042	0.809	79
R13_04_Cat05_T298	298	67	0.17	27.57	-0.548	0.618	-0.647	1799.34	7.90239	1.7	5.99975	6.47287	1.7	6.03607	40.8	79.18	2.14419	2.11169	1.74	-0.83	-0.553	0.027	0.794	79
R16_01_Cat04_T313_04	313	20	0.17	27.57	-0.662	-0.315	-0.359	1646.29	3.87626	1.7	7.26205	3.32083	1.7	3.3117	42.7	78.31	2.1583	2.13019	1.74	-0.858	-0.742	0.014	0.787	79
R16_01_Cat04_T313_06	313	20	0.17	27.57	-0.662	-0.315	-0.359	1646.29	3.87626	1.7	7.26205	3.32083	1.7	3.3117	42.5	78.37	2.19474	2.12734	1.74	-0.865	-0.738	0.031	0.782	79
R16_14_Cat10_T313	313	20	0.17	27.57	-0.659	-0.309	-0.359	1655.78	3.88351	1.7	8.53279	3.32076	1.7	3.31194	42.7	78.41	2.17674	2.13292	1.74	-0.85	-0.74	0.028	0.784	79
R16_15_Cat10_T313	313	20	0.17	27.57	-0.659	-0.309	-0.359	1655.1	3.88675	1.7	8.75263	3.32062	1.7	3.31177	42.7	78.41	2.17674	2.13292	1.74	-0.85	-0.74	0.028	0.784	79
R10_08_Cat05_T300	300	100	0.17	27.57	-0.556	0.609	-0.155	1743.49	8.33694	1.7	4.04023	4.16797	1.7	4.95049	40.8	77.14	2.15921	2.15291	1.74	-0.83	-0.553	0.027	0.794	79.1
R13_36_Cat05_T298	298	67	0.17	27.57	-0.523	0.751	-0.562	1805.21	5.4896	1.81483	3.09241	5.21281	1.7	3.17277	40.8	79.18	2.14419	2.11169	1.74	-0.83	-0.553	0.027	0.794	80
R19_16_Cat09_T298	298	100	0.17	27.57	-0.482	-0.12	-0.734	1702.93	4.47332	2.29283	4.93977	2.18632	1.7	2.13694	43.2	73.83	2.1406	2.13939	1.74	-0.836	-0.567	-0.005	0.799	80
R14_12_Cat05_T298	298	100	0.17	27.57	-0.57	-0.133	-0.148	1737.29	5.20648	1.7	7.6886	3.43536	1.7	6.51214	40.8	79.18	2.14419	2.11169	1.74	-0.83	-0.553	0.027	0.794	81
R16_01_Cat10_T313	313	20	0.17	27.57	-0.662	-0.315	-0.359	1646.29	3.87626	1.7	7.26205	3.32083	1.7	3.3117	42.7	78.41	2.17674	2.13292	1.74	-0.85	-0.74	0.028	0.784	81
R16_06_Cat10_T313	313	20	0.17	27.57	-0.664	-0.32	-0.359	1647.82	5.3323	1.7	6.82417	3.32046	1.7	3.31225	42.7	78.41	2.17674	2.13292	1.74	-0.85	-0.74	0.028	0.784	81
R16_13_Cat10_T313	313	20	0.17	27.57	-0.662	-0.315	-0.359	1655.37	7.25912	1.7	6.52078	3.31989	1.7	3.31214	42.7	78.41	2.17674	2.13292	1.74	-0.85	-0.74	0.028	0.784	81
R18_07_Cat11_T293	293	200	0.17	27.57	-0.696	-0.09	-0.107	1581.08	4.69701	1.7	4.96444	4.52178	2.12602	4.60525	47.9	78.98	2.15993	2.12513	1.91	-0.882	-0.774	-0.22	0.794	81
R19_15_Cat09_T298	298	100	0.17	27.57	-0.486	-0.117	-0.734	1700.17	6.15219	1.88487	6.62863	2.18635	1.7	2.13684	43.2	73.83	2.1406	2.13939	1.74	-0.836	-0.567	-0.005	0.799	81
R16_16_Cat10_T313	313	20	0.17	27.57	-0.655	-0.3	-0.36	1656.29	3.97261	1.7	8.92403	3.32069	1.7	3.31139	42.7	78.41	2.17674	2.13292	1.74	-0.85	-0.74	0.028	0.784	82
R16_19_Cat10_T313	313	20	0.17	27.57	-0.665	-0.321	-0.358	1643.05	9.52293	1.7	5.13332	3.32102	1.7	3.31146	42.7	78.41	2.17674	2.13292	1.74	-0.85	-0.74	0.028	0.784	82
R16_24_Cat10_T313	313	20	0.17	27.57	-0.662	-0.313	-0.359	1646.11	9.07847	1.7	5.24089	3.3213	1.7	3.31119	42.7	78.41	2.17674	2.13292	1.74	-0.85	-0.74	0.028	0.784	82
R02_04_Cat03_T301	301	200	0.17	27.57	-0.6	-0.168	-0.533	1738.42	3.45534	1.7	4.95917	2.29073	1.7	3.46679	43.2	79.27	2.15206	2.16809	1.75	-0.887	-0.561	0.034	0.794	83
R02_07_Cat03_T301	301	200	0.17	27.57	-0.626	-0.153	-0.789	1713.82	6.45363	1.7	4.13179	2.1849	1.7	2.13593	43.2	79.27	2.15206	2.16809	1.75	-0.887	-0.561	0.034	0.794	83
R16_04_Cat10_T313	313	20	0.17	27.57	-0.654	-0.302	-0.361	1660.34	4.19138	1.7	7.44619	3.3203	1.7	3.31162	42.7	78.41	2.17674	2.13292	1.74	-0.85	-0.74	0.028	0.784	83
R16_26_Cat10_T313	313	20	0.17	27.57	-0.66	-0.342	-0.36	1663.38	9.095	1.7	5.99776	3.32085	1.7	3.31133	42.7	78.41	2.17674	2.13292	1.74	-0.85	-0.74	0.028	0.784	83
R18_02_Cat11_T293	293	200	0.17	27.57	-0.49	-0.114	-0.507	1700.73	6.15322	1.88327	6.62988	3.26514	1.7	2.70416	47.9	78.98	2.15993	2.12513	1.91	-0.882	-0.774	-0.22	0.794	83
R14_05_Cat05_T298	298	100	0.17	27.57	-0.575	-0.132	-0.165	1734.31	5.28511	1.7	7.68823	3.42588	1.7	5.58026	40.8	79.18	2.14419	2.11169	1.74	-0.83	-0.553	0.027	0.794	84
R16_10_Cat10_T313	313	20	0.17	27.57	-0.656	-0.305	-0.36	1659.36	5.41211	1.7	7.26144	3.32035	1.7	3.31197	42.7	78.41	2.17674	2.13292	1.74	-0.85	-0.74	0.028	0.784	84
R02_05_Cat03_T301	301	200	0.17	27.57	-0.605	-0.172	-0.2	1722.67	6.07275	1.7	6.04037	3.44643	1.7	4.9592	43.2	79.27	2.15206	2.16809	1.75	-0.887	-0.561	0.034	0.794	85
R14_10_Cat05_T298	298	100	0.17	27.57	-0.583	-0.129	-0.177	1727.84	8.60547	1.7	5.97876	5.27333	1.7	7.69135	40.8	79.18	2.14419	2.11169	1.74	-0.83	-0.553	0.027	0.794	85
R16_03_Cat10_T313	313	20	0.17	27.57	-0.655	-0.303	-0.361	1659.97	4.03031	1.7	7.45695	3.31981	1.7	3.31214	42.7	78.41	2.17674	2.13292	1.74	-0.85	-0.74	0.028	0.784	85
R16_08_Cat10_T313	313	20	0.17	27.57	-0.658	-0.307	-0.359	1654.19	4.50914	1.7	7.24548	3.32105	1.7	3.31139	42.7	78.41	2.17674	2.13292	1.74	-0.85	-0.74	0.028	0.784	85
R16_09_Cat10_T313	313	20	0.17	27.57	-0.656	-0.305	-0.36	1659.22	5.19007	1.7	7.25839	3.3195	1.7	3.31242	42.7	78.41	2.17674	2.13292	1.74	-0.85	-0.74	0.028	0.784	85
R16_11_Cat10_T313	313	20	0.17	27.57	-0.652	-0.296	-0.36	1659.68	5.42513	1.7	7.25583	3.31978	1.7	3.31193	42.7	78.41	2.17674	2.13292	1.74	-0.85	-0.74	0.028	0.784	85
R16_25_Cat10_T313	313	20	0.17	27.57	-0.653	-0.328	-0.352	1632.43	6.13464	1.7	4.63561	3.31144	1.7	3.33261	42.7	78.41	2.17674	2.13292	1.74	-0.85	-0.74	0.028	0.784	85
R02_02_Cat03_T301	301	200	0.17	27.57	-0.619	-0.147	-0.79	1720.9	5.77909	1.75	4.45784	2.18495	1.7	2.13574	43.2	79.27	2.15206	2.16809	1.75	-0.887	-0.561	0.034	0.794	86
R02_03_Cat03_T301	301	200	0.17	27.57	-0.623	-0.164	-0.79	1716.53	6.28799	1.75	3.24778	2.18494	1.7	2.13553	43.2	79.27	2.15206	2.16809	1.75	-0.887	-0.561	0.034	0.794	86
R16_05_Cat10_T313	313	20	0.17	27.57	-0.652	-0.3	-0.361	1662.87	4.24368	1.7	7.388	3.32012	1.7	3.31172	42.7	78.41	2.17674	2.13292	1.74	-0.85	-0.74	0.028	0.784	86
R16_23_Cat10_T313	313	20	0.17	27.57	-0.645	-0.288	-0.361	1667.48	5.26687	1.7	7.17635	3.31982	1.7	3.31196	42.7	78.41	2.17674	2.13292	1.74	-0.85	-0.74	0.028	0.784	87
R07_06_Cat05_T300	300	100	0.17	27.57	-0.57	-0.142	-0.171	1771.15	9.42979	1.7	6.03258	3.41833	1.7	4.95513	40.8	77.14	2.15921	2.15291	1.74	-0.83	-0.553	0.027	0.794	87.6
R02_02_Cat02_T301	301	200	0.17	27.57	-0.619	-0.147	-0.79	1720.9	5.77909	1.75	4.45784	2.18495	1.7	2.13574	42.1	79.22	2.16778	2.14473	1.77	-0.854	-0.553	0.035	0.783	88
R02_06_Cat03_T301	301	200	0.17	27.57	-0.626	-0.153	-0.784	1708	4.93597	1.7	5.41278	2.18447	1.7	2.13529	43.2	79.27	2.15206	2.16809	1.75	-0.887	-0.561	0.034	0.794	88
R13_07_Cat05_T298	298	67	0.17	27.57	-0.54	0.621	-0.64	1808.25	7.85902	1.7	6.02178	6.48042	1.7	4.00499	40.8	79.18	2.14419	2.11169	1.74	-0.83	-0.553	0.027	0.794	88
R14_09_Cat05_T298	298	100	0.17	27.57	-0.577	-0.13	-0.136	1729.96	5.24606	1.7	7.68764	6.83876	1.7	5.84713	40.8	79.18	2.14419	2.11169	1.74	-0.83	-0.553	0.027	0.794	88
R17_20_Cat08_T298	298	100	0.17	27.57	-0.554	0.324	-0.354	1740.77	6.1962	1.7	8.05939	4.35236	1.7	4.31247	48.7	79.18	2.14419	2.11169	1.85	-0.897	-0.576	0.237	0.819	88
R19_01_Cat09_T298	298	100	0.17	27.57	-0.456	-0.072	-0.116	1685.54	3.44375	1.7	6.28658	4.47963	2.26769	4.94046	43.2	73.83	2.1406	2.13939	1.74	-0.836	-0.567	-0.005	0.799	88
R07_13_Cat05_T300	300	100	0.17	27.57	-0.561	-0.153	-0.563	1813.87	6.93274	1.7	4.90611	2.28332	1.7	3.2484	40.8	77.14	2.15921	2.15291	1.74	-0.83	-0.553	0.027	0.794	88.1
R07_07_Cat05_T300	300	100	0.17	27.57	-0.571	-0.142	-0.171	1770.64	6.93477	1.7	4.90703	3.4182	1.7	4.95485	40.8	77.14	2.15921	2.15291	1.74	-0.83	-0.553	0.027	0.794	88.3
R02_03_Cat02_T313	313	200	0.17	27.57	-0.623	-0.164	-0.79	1716.83	6.28798	1.75	3.24777	2.18494	1.7	2.13552	42.1	79.22	2.16755	2.14475	1.77	-0.854	-0.553	0.034	0.783	89
R13_11_Cat05_T298	298	67	0.17	27.57	-0.552	-0.004	-0.642	1789.54	7.84506	1.7	6.026	6.26293	1.73187	6.05611	40.8	79.18	2.14419	2.11169	1.74	-0.83	-0.553	0.027	0.794	89
R13_14_Cat05_T298	298	67	0.17	27.57	-0.545	0.627	-0.64	1788.99	6.22485	1.7	5.19911	4.16441	1.7	7.07243	40.8	79.18	2.14419	2.11169	1.74	-0.83	-0.553	0.027	0.794	89
R18_03_Cat11_T293	293	200	0.17	27.57	-0.487	-0.112	-0.289	1695.05	6.15535	1.8441	6.63225	3.26763	1.7	3.25076	47.9	78.98	2.15993	2.12513	1.91	-0.882	-0.774	-0.22	0.794	89
R19_08_Cat09_T298	298	100	0.17	27.57	-0.45	-0.029	-0.117	1687.44	3.42907	1.7	6.40388	4.47899	2.26342	4.93885	43.2	73.83	2.1406	2.13939	1.74	-0.836	-0.567	-0.005	0.799	89
R07_12_Cat05_T300	300	100	0.17	27.57	-0.561	-0.153	-0.563	1814.18	11.8823	1.7	4.85486	2.28427	1.7	3.24814	40.8	77.14	2.15921	2.15291	1.74	-0.83	-0.553	0.027	0.794	89.6
R06_10_Cat06_T303	303	100	0.17	27.57	-0.6	-0.16	-0.194	1698.45	4.53306	1.7	5.82949	3.44202	1.7	4.95929	40.6	74.86	2.15724	2.17605	1.73	-0.875	-0.57	0.041	0.809	90
R09_10_Cat09_T298	298	100	0.17	27.57	-0.562	-0.169	-0.345	1761.52	4.47389	1.7	5.22693	3.45262	1.7	4.96042	43.2	73.83	2.1406	2.13939	1.74	-0.836	-0.567	-0.005	0.799	90
R13_31_Cat05_T298	298	67	0.17	27.57	-0.544	0.614	-0.657	1791.36	7.37074	2.27428	5.59263	6.53148	1.7	3.78783	40.8	79.18	2.14419	2.11169	1.74	-0.83	-0.553	0.027	0.794	90
R13_35_Cat05_T298	298	67	0.17	27.57	-0.562	0.593	-0.559	1791.64	5.49047	1.83	3.09707	4.98022	1.7	3.25714	40.8	79.18	2.14419	2.11169	1.74	-0.83	-0.553	0.027	0.794	90
R14_08_Cat05_T298	298	100	0.17	27.57	-0.573	-0.12	-0.131	1734.55	5.28203	1.7	7.68689	6.1417	1.7	6.50716	40.8	79.18	2.14419	2.11169	1.74	-0.83	-0.553	0.027	0.794	90
R18_01_Cat11_T293	293	200	0.17	27.57	-0.486	-0.117	-0.734	1700.17	6.15219	1.88487	6.62863	2.18635	1.7	2.13684	47.9	78.98	2.15993	2.12513	1.91	-0.882	-0.774	-0.22	0.794	90
R19_04_Cat09_T298	298	100	0.17	27.57	-0.461	-0.084	-0.114	1683.27	5.94027	1.7	3.50704	4.47966	2.26342	4.9415	43.2	73.83	2.1406	2.13939	1.74	-0.836	-0.567	-0.005	0.799	90
R19_07_Cat09_T298	298	100	0.17	27.57	-0.463	-0.106	-0.129	1678.1	5.23719	1.7	4.78072	4.47284	2.26099	4.93625	43.2	73.83	2.1406	2.13939	1.74	-0.836	-0.567	-0.005	0.799	90
R19_11_Cat09_T298	298	100	0.17	27.57	-0.46	-0.083	-0.114	1686.1	6.21038	1.7	4.12638	4.47952	2.25517	4.9415	43.2	73.83	2.1406	2.13939	1.74	-0.836	-0.567	-0.005	0.799	90
R06_09_Cat06_T283	283	100	0.17	27.57	-0.603	-0.159	-0.189	1696.23	4.06093	1.7	4.97583	3.44166	1.7	4.95982	40.6	74.85	2.15757	2.17603	1.73	-0.875	-0.57	0.042	0.809	91
R13_10_Cat05_T298	298	67	0.17	27.57	-0.548	0.608	-0.646	1811.72	7.91522	1.7	5.99288	6.235	1.7	6.04716	40.8	79.18	2.14419	2.11169	1.74	-0.83	-0.553	0.027	0.794	91
R14_15_Cat05_T298	298	100	0.17	27.57	-0.545	0.106	-0.137	1759.32	5.18174	1.7	7.6979	4.35819	1.7	4.4389	40.8	79.18	2.14419	2.11169	1.74	-0.83	-0.553	0.027	0.794	91
R19_02_Cat09_T298	298	100	0.17	27.57	-0.455	-0.055	-0.116	1686.26	4.68863	1.7	4.9746	4.47919	2.25848	4.93994	43.2	73.83	2.1406	2.13939	1.74	-0.836	-0.567	-0.005	0.799	91
R19_09_Cat09_T298	298	100	0.17	27.57	-0.454	-0.052	-0.116	1687.02	3.43468	1.7	6.40437	4.47917	2.2572	4.93979	43.2	73.83	2.1406	2.13939	1.74	-0.836	-0.567	-0.005	0.799	91
R19_10_Cat09_T298	298	100	0.17	27.57	-0.462	-0.07	-0.115	1683.3	6.14787	1.7	6.43452	4.47964	2.26425	4.94162	43.2	73.83	2.1406	2.13939	1.74	-0.836	-0.567	-0.005	0.799	91
R07_15_Cat05_T300	300	100	0.17	27.57	-0.561	-0.143	-0.171	1805.78	4.63984	1.7	9.59343	4.49793	1.70119	4.41022	40.8	77.14	2.15921	2.15291	1.74	-0.83	-0.553	0.027	0.794	91.5
R07_09_Cat05_T300	300	100	0.17	27.57	-0.569	-0.142	-0.171	1771.05	9.46618	1.7	5.80759	3.41841	1.7	4.95486	40.8	77.14	2.15921	2.15291	1.74	-0.83	-0.553	0.027	0.794	91.8
R02_04_Cat02_T301	301	200	0.17	27.57	-0.6	-0.168	-0.533	1738.42	3.45534	1.7	4.95917	2.29073	1.7	3.46679	42.1	79.22	2.16778	2.14473	1.77	-0.854	-0.553	0.035	0.783	92
R09_07_Cat09_T298	298	100	0.17	27.57	-0.59	-0.163	-0.577	1743.63	5.17887	1.7	5.27494	3.45149	1.7	4.96292	43.2	73.83	2.1406	2.13939	1.74	-0.836	-0.567	-0.005	0.799	92
R13_15_Cat05_T298	298	67	0.17	27.57	-0.541	0.61	-0.63	1800.74	6.13671	1.72464	5.15277	4.9704	1.7	4.95818	40.8	79.18	2.14419	2.11169	1.74	-0.83	-0.553	0.027	0.794	92
R13_16_Cat05_T298	298	67	0.17	27.57	-0.539	0.611	-0.631	1805.68	6.11411	1.75127	5.15213	5.00529	1.7	5.45685	40.8	79.18	2.14419	2.11169	1.74	-0.83	-0.553	0.027	0.794	92
R13_33_Cat05_T298	298	67	0.17	27.57	-0.539	0.61	-0.655	1804.13	6.55309	1.7	3.77144	4.83517	1.7	5.48131	40.8	79.18	2.14419	2.11169	1.74	-0.83	-0.553	0.027	0.794	92
R19_05_Cat09_T298	298	100	0.17	27.57	-0.461	-0.069	-0.115	1684.9	5.41431	1.7	4.45868	4.47933	2.25783	4.94102	43.2	73.83	2.1406	2.13939	1.74	-0.836	-0.567	-0.005	0.799	92
R19_06_Cat09_T298	298	100	0.17	27.57	-0.464	-0.106	-0.114	1681.83	6.89963	1.7	4.02616	4.48017	2.2664	4.94228	43.2	73.83	2.1406	2.13939	1.74	-0.836	-0.567	-0.005	0.799	92
R19_12_Cat09_T298	298	100	0.17	27.57	-0.47	-0.086	-0.112	1672.49	6.15166	1.76979	6.63704	3.44959	1.7	4.97224	43.2	73.83	2.1406	2.13939	1.74	-0.836	-0.567	-0.005	0.799	92
R22_05_Cat13_T333	333	200	0.17	27.57	-0.643	-0.167	-0.788	1688.13	6.91059	1.7	6.35444	2.18254	1.7	2.13628	42.8	78.79	2.11552	2.15028	1.82	-0.833	-0.745	-0.265	0.706	92.3
R02_05_Cat02_T301	301	200	0.17	27.57	-0.605	-0.172	-0.2	1722.67	6.07275	1.7	6.04037	3.44643	1.7	4.9592	42.1	79.22	2.16778	2.14473	1.77	-0.854	-0.553	0.035	0.783	93
R06_18_Cat06_T303	303	100	0.17	27.57	-0.604	-0.102	-0.159	1690.59	5.13402	1.7	6.29372	3.44472	1.7	4.95946	40.6	74.86	2.15724	2.17605	1.73	-0.875	-0.57	0.042	0.809	93
R13_34_Cat05_T298	298	67	0.17	27.57	-0.529	0.609	-0.569	1805.42	6.90157	1.7	5.26625	5.48919	1.81001	3.09455	40.8	79.18	2.14419	2.11169	1.74	-0.83	-0.553	0.027	0.794	93
R14_02_Cat05_T298	298	100	0.17	27.57	-0.575	-0.131	-0.146	1733.73	5.15214	1.7	7.68689	5.38659	1.70896	4.47296	40.8	79.18	2.14419	2.11169	1.74	-0.83	-0.553	0.027	0.794	93
R19_03_Cat09_T298	298	100	0.17	27.57	-0.456	-0.071	-0.116	1685.99	3.44406	1.7	6.51848	4.47964	2.26852	4.94045	43.2	73.83	2.1406	2.13939	1.74	-0.836	-0.567	-0.005	0.799	93
R19_14_Cat09_T298	298	100	0.17	27.57	-0.467	-0.069	-0.112	1681.1	6.14794	1.99201	6.63367	6.14733	1.7	6.43364	43.2	73.83	2.1406	2.13939	1.74	-0.836	-0.567	-0.005	0.799	93
R04_01_Cat05_T353	353	200	0.17	27.57	-0.626	-0.167	-0.789	1714.39	3.45062	1.7	4.96217	2.18488	1.7	2.13556	40	77.3	2.16582	2.15144	1.74	-0.851	-0.552	0.023	0.792	94
R04_03_Cat05_T313	313	200	0.17	27.57	-0.629	-0.162	-0.347	1693.17	3.50844	1.7	5.01873	3.47095	1.7	4.96814	39.9	77.31	2.16664	2.15112	1.74	-0.834	-0.553	0.033	0.792	94
R09_02_Cat09_T298	298	100	0.17	27.57	-0.577	-0.164	-0.565	1751.2	5.34355	1.7	5.37027	3.4552	1.7	4.96292	43.2	73.83	2.1406	2.13939	1.74	-0.836	-0.567	-0.005	0.799	94
R09_05_Cat09_T298	298	100	0.17	27.57	-0.569	-0.167	-0.604	1760.38	6.73298	1.83385	3.55044	3.45734	1.7	4.96124	43.2	73.83	2.1406	2.13939	1.74	-0.836	-0.567	-0.005	0.799	94
R09_06_Cat09_T298	298	100	0.17	27.57	-0.575	-0.165	-0.575	1753.16	5.25807	1.7	5.43092	3.45189	1.7	4.96248	43.2	73.83	2.1406	2.13939	1.74	-0.836	-0.567	-0.005	0.799	94
R13_02_Cat05_T298	298	67	0.17	27.57	-0.544	0.615	-0.644	1807.55	8.53849	2.41283	5.71232	7.51888	1.91275	5.50681	40.8	79.18	2.14419	2.11169	1.74	-0.83	-0.553	0.027	0.794	94
R13_08_Cat05_T298	298	67	0.17	27.57	-0.547	0.616	-0.645	1804.32	7.45312	2.29617	3.59286	5.54522	1.80123	4.36079	40.8	79.18	2.14419	2.11169	1.74	-0.83	-0.553	0.027	0.794	94
R13_24_Cat05_T298	298	67	0.17	27.57	-0.549	0.632	-0.558	1795.52	7.10487	1.7	5.08073	4.55768	1.87123	6.93021	40.8	79.18	2.14419	2.11169	1.74	-0.83	-0.553	0.027	0.794	94
R13_32_Cat05_T298	298	67	0.17	27.57	-0.549	0.613	-0.657	1786.47	6.53763	1.7	3.79674	4.95283	1.7	4.97578	40.8	79.18	2.14419	2.11169	1.74	-0.83	-0.553	0.027	0.794	94
R17_18_Cat08_T298	298	100	0.17	27.57	-0.563	0.325	-0.371	1733.28	7.88107	1.7	5.75508	4.37565	1.7	4.30156	48.7	79.18	2.14419	2.11169	1.85	-0.897	-0.576	0.237	0.819	94
R17_19_Cat08_T298	298	100	0.17	27.57	-0.564	0.325	-0.372	1732.59	8.75919	2.51048	6.04069	4.37601	1.7	4.30169	48.7	79.18	2.14419	2.11169	1.85	-0.897	-0.576	0.237	0.819	94
R07_04_Cat05_T300	300	100	0.17	27.57	-0.569	-0.142	-0.171	1770.78	17.2787	2.52587	4.72385	3.41836	1.7	4.9549	40.8	77.14	2.15921	2.15291	1.74	-0.83	-0.553	0.027	0.794	94.3
R10_12_Cat05_T300	300	100	0.17	27.57	-0.545	0.605	-0.141	1770.02	8.33361	1.71301	4.22301	7.04042	3.18064	5.37904	40.8	77.14	2.15921	2.15291	1.74	-0.83	-0.553	0.027	0.794	94.42
R01_03_Cat01_T301	301	200	0.17	27.57	-0.623	-0.164	-0.79	1716.53	6.288	1.75	3.24778	2.18494	1.7	2.13553	42.2	77.79	2.14262	2.12838	1.73	-0.863	-0.742	0.027	0.796	95
R01_07_Cat01_T301	301	200	0.17	27.57	-0.628	-0.163	-0.559	1711.28	4.97628	1.70744	3.24703	9.3096	2.03198	3.5368	42.2	77.79	2.14262	2.12838	1.73	-0.863	-0.742	0.027	0.796	95
R02_01_Cat02_T313	313	200	0.17	27.57	-0.628	-0.167	-0.789	1712.59	3.4506	1.7	4.96223	2.18487	1.7	2.13562	42.1	79.22	2.16755	2.14475	1.77	-0.854	-0.553	0.034	0.783	95
R04_04_Cat05_T301	301	200	0.17	27.57	-0.63	-0.166	-0.553	1706.85	4.97751	1.70585	3.24842	3.26966	1.7	2.71334	39.9	77.32	2.16677	2.15106	1.74	-0.834	-0.553	0.033	0.792	95
R04_04_Cat05_T313	313	200	0.17	27.57	-0.63	-0.166	-0.553	1707.12	4.9775	1.70595	3.24841	3.26963	1.7	2.71334	39.9	77.31	2.16664	2.15112	1.74	-0.834	-0.553	0.033	0.792	95
R04_05_Cat05_T313	313	200	0.17	27.57	-0.628	-0.162	-0.338	1708.28	3.43401	1.7	4.96825	3.26963	1.7	3.24811	39.9	77.31	2.16664	2.15112	1.74	-0.834	-0.553	0.033	0.792	95
R06_19_Cat06_T283	283	100	0.17	27.57	-0.606	-0.133	-0.158	1691.19	4.02636	1.7	5.58316	3.44273	1.7	4.96039	40.6	74.86	2.15724	2.17605	1.73	-0.875	-0.57	0.042	0.809	95
R09_03_Cat09_T298	298	100	0.17	27.57	-0.577	-0.164	-0.567	1751.16	5.33468	1.7	5.6695	3.455	1.7	4.96253	43.2	73.83	2.1406	2.13939	1.74	-0.836	-0.567	-0.005	0.799	95
R09_08_Cat09_T298	298	100	0.17	27.57	-0.559	-0.173	-0.353	1762.06	9.46781	1.7	5.81048	3.45389	1.7	4.95958	43.2	73.83	2.1406	2.13939	1.74	-0.836	-0.567	-0.005	0.799	95
R09_11_Cat09_T298	298	100	0.17	27.57	-0.566	-0.167	-0.341	1758.84	5.00745	1.7	5.34395	3.45242	1.7	4.96157	43.2	73.83	2.1406	2.13939	1.74	-0.836	-0.567	-0.005	0.799	95
R13_12_Cat05_T298	298	67	0.17	27.57	-0.571	0.608	-0.659	1775.81	7.89398	1.7	6.0339	6.2287	1.7	6.04858	40.8	79.18	2.14419	2.11169	1.74	-0.83	-0.553	0.027	0.794	95
R13_22_Cat05_T298	298	67	0.17	27.57	-0.553	0.598	-0.645	1812.67	6.17875	1.71379	5.20468	4.18325	1.7	2.83329	40.8	79.18	2.14419	2.11169	1.74	-0.83	-0.553	0.027	0.794	95
R14_17_Cat05_T298	298	100	0.17	27.57	-0.545	-0.103	-0.12	1720.99	5.17368	1.7	7.70382	6.58856	1.7	6.01575	40.8	79.18	2.14419	2.11169	1.74	-0.83	-0.553	0.027	0.794	95
R14_18_Cat05_T298	298	100	0.17	27.57	-0.553	-0.116	-0.117	1713.99	9.59793	1.7	4.4131	5.25752	1.7	7.70614	40.8	79.18	2.14419	2.11169	1.74	-0.83	-0.553	0.027	0.794	95
R17_15_Cat08_T298	298	100	0.17	27.57	-0.566	0.324	-0.387	1732.24	6.2384	1.8538	6.47524	4.35324	1.7	4.31142	48.7	79.18	2.14419	2.11169	1.85	-0.897	-0.576	0.237	0.819	95
R20_11_Cat12_T323	323	100	-0.14	72.3	-0.612	-0.163	-0.345	1767.74	4.56593	2.20197	7.13313	3.2526	1.96058	3.23815	48.1	78.41	2.18974	2.12848	1.74	-0.851	-0.737	0.032	0.784	95
R22_01_Cat13_T333	333	1000	0.17	27.57	-0.665	-0.234	-0.777	1620.1	6.35731	1.7	4.77291	2.1816	1.7	2.1338	42.8	78.79	2.11552	2.15028	1.82	-0.833	-0.745	-0.265	0.706	95
R07_11_Cat05_T300	300	100	0.17	27.57	-0.561	-0.153	-0.563	1813.95	10.9374	1.7	4.04381	2.28432	1.7	3.24796	40.8	77.14	2.15921	2.15291	1.74	-0.83	-0.553	0.027	0.794	95.2
R10_06_Cat05_T300	300	100	0.17	27.57	-0.552	0.61	-0.22	1748.01	8.33464	1.7	4.09959	3.82825	1.7	4.97001	40.8	77.14	2.15921	2.15291	1.74	-0.83	-0.553	0.027	0.794	95.3
R07_10_Cat05_T300	300	100	0.17	27.57	-0.561	-0.153	-0.563	1814	9.46554	1.7	5.80437	2.28425	1.7	3.24806	40.8	77.14	2.15921	2.15291	1.74	-0.83	-0.553	0.027	0.794	95.4
R07_14_Cat05_T300	300	100	0.17	27.57	-0.564	-0.153	-0.569	1807.95	4.305	2.46357	9.74198	3.23751	1.74793	2.68993	40.8	77.14	2.15921	2.15291	1.74	-0.83	-0.553	0.027	0.794	95.5
R01_01_Cat01_T333	333	200	0.17	27.57	-0.628	-0.167	-0.789	1712.59	3.4506	1.7	4.96223	2.18487	1.7	2.13562	42.2	78.62	2.11968	2.13272	1.73	-0.87	-0.742	0.025	0.796	96
R01_08_Cat01_T301	301	200	0.17	27.57	-0.631	-0.167	-0.789	1717.21	4.26729	1.7	7.1796	2.18497	1.7	2.13616	42.2	77.79	2.14262	2.12838	1.73	-0.863	-0.742	0.027	0.796	96
R04_01_Cat05_T301	301	200	0.17	27.57	-0.628	-0.167	-0.789	1712.59	3.4506	1.7	4.96223	2.18487	1.7	2.13562	39.9	77.32	2.16677	2.15106	1.74	-0.834	-0.553	0.033	0.792	96
R04_01_Cat05_T313	313	200	0.17	27.57	-0.628	-0.167	-0.789	1712.59	3.4506	1.7	4.96222	2.18487	1.7	2.13561	39.9	77.31	2.16664	2.15112	1.74	-0.834	-0.553	0.033	0.792	96
R09_04_Cat09_T298	298	100	0.17	27.57	-0.575	-0.165	-0.599	1756.91	5.09156	1.7	5.24011	3.45529	1.7	4.96274	43.2	73.83	2.1406	2.13939	1.74	-0.836	-0.567	-0.005	0.799	96
R09_09_Cat09_T298	298	100	0.17	27.57	-0.561	-0.172	-0.353	1761.48	4.44643	1.7	5.15608	3.45197	1.7	4.95995	43.2	73.83	2.1406	2.13939	1.74	-0.836	-0.567	-0.005	0.799	96
R09_13_Cat09_T298	298	100	0.17	27.57	-0.586	-0.161	-0.56	1750.27	6.39121	1.7	6.11392	3.45549	1.7	4.96392	43.2	73.83	2.1406	2.13939	1.74	-0.836	-0.567	-0.005	0.799	96
R14_21_Cat05_T298	298	100	0.17	27.57	-0.542	-0.093	-0.121	1722.73	7.43644	1.7	6.1251	5.18405	1.7	7.70425	40.8	79.18	2.14419	2.11169	1.74	-0.83	-0.553	0.027	0.794	96
R17_04_Cat08_T298	298	100	0.17	27.57	-0.594	0.633	-0.316	1559.96	6.48797	1.7	6.06521	5.05675	2.34873	5.60101	48.7	79.18	2.14419	2.11169	1.85	-0.897	-0.576	0.237	0.819	96
R17_08_Cat08_T298	298	100	0.17	27.57	-0.569	0.325	-0.38	1728.37	8.21644	1.8914	6.14374	4.3759	1.7	4.30216	48.7	79.18	2.14419	2.11169	1.85	-0.897	-0.576	0.237	0.819	96
R17_17_Cat08_T298	298	100	0.17	27.57	-0.569	0.325	-0.38	1728.22	7.8531	1.70741	6.12187	4.37596	1.7	4.30188	48.7	79.18	2.14419	2.11169	1.85	-0.897	-0.576	0.237	0.819	96
R17_14_Cat08_T298	298	100	0.17	27.57	-0.572	0.325	-0.383	1725.92	6.14426	1.7	8.26452	4.37589	1.7	4.30217	48.7	79.18	2.14419	2.11169	1.85	-0.897	-0.576	0.237	0.819	96
R01_02_Cat01_T301	301	200	0.17	27.57	-0.619	-0.147	-0.79	1720.9	5.77909	1.75	4.45784	2.18495	1.7	2.13574	42.2	77.79	2.14262	2.12838	1.73	-0.863	-0.742	0.027	0.796	97
R01_05_Cat01_T301	301	200	0.17	27.57	-0.642	-0.197	-0.787	1700.81	6.89068	1.7	4.02544	2.18482	1.7	2.13546	42.2	77.79	2.14262	2.12838	1.73	-0.863	-0.742	0.027	0.796	97
R01_06_Cat01_T301	301	200	0.17	27.57	-0.63	-0.166	-0.553	1706.85	4.97751	1.70585	3.24842	3.26966	1.7	2.71334	42.2	77.79	2.14262	2.12838	1.73	-0.863	-0.742	0.027	0.796	97
R01_12_Cat01_T301	301	200	0.17	27.57	-0.63	-0.237	-0.581	1713.76	3.42399	1.7	4.95951	4.57124	2.20148	3.71039	42.2	77.79	2.14262	2.12838	1.73	-0.863	-0.742	0.027	0.796	97
R05_08_Cat07_T333	333	100	0.17	27.57	-0.577	-0.16	-0.294	1731.65	5.04307	1.7	3.69729	3.43041	1.7	4.95803	40.1	75.28	2.14546	2.17619	1.73	-0.875	-0.57	0.038	0.799	97
R06_05_Cat06_T333	333	100	0.17	27.57	-0.623	-0.153	-0.158	1681.24	5.93051	1.74393	4.52109	3.44148	1.7	4.96278	40.6	74.88	2.15667	2.17608	1.73	-0.875	-0.57	0.041	0.809	97
R06_12_Cat06_T303	303	100	0.17	27.57	-0.593	-0.159	-0.159	1704.73	3.4505	1.7	6.26842	4.50631	1.7	4.9721	40.6	74.86	2.15724	2.17605	1.73	-0.875	-0.57	0.042	0.809	97
R06_13_Cat06_T313	313	100	0.17	27.57	-0.599	-0.157	-0.175	1701.07	4.50548	1.7	4.97241	3.44153	1.7	5.56957	40.6	74.85	2.15734	2.17588	1.73	-0.875	-0.57	0.042	0.809	97
R09_12_Cat09_T298	298	100	0.17	27.57	-0.566	-0.168	-0.341	1759.74	6.20493	1.7	6.11157	3.45604	1.7	4.96079	43.2	73.83	2.1406	2.13939	1.74	-0.836	-0.567	-0.005	0.799	97
R12_03_Cat08_T323	323	200	-0.327467	27.0267	-0.601	-0.151	-0.218	1737.21	5.88309	2.49839	6.54715	3.42062	1.7	4.96326	48.2	79.02	2.1505	2.11373	1.92	-0.901	-0.575	0.24	0.817	97
R13_17_Cat05_T298	298	67	0.17	27.57	-0.537	0.623	-0.64	1797.23	6.48542	1.7	5.76193	6.26892	1.7	5.20744	40.8	79.18	2.14419	2.11169	1.74	-0.83	-0.553	0.027	0.794	97
R13_18_Cat05_T298	298	67	0.17	27.57	-0.536	0.625	-0.649	1797.35	6.69428	1.7	6.50727	6.27589	1.7	5.21038	40.8	79.18	2.14419	2.11169	1.74	-0.83	-0.553	0.027	0.794	97
R13_21_Cat05_T298	298	67	0.17	27.57	-0.551	0.604	-0.636	1812.55	6.48592	1.7	6.03843	6.06221	1.80232	5.15998	40.8	79.18	2.14419	2.11169	1.74	-0.83	-0.553	0.027	0.794	97
R13_28_Cat05_T298	298	67	0.17	27.57	-0.551	0.628	-0.555	1782.84	6.40641	2.3355	6.91264	5.4873	1.79484	3.09891	40.8	79.18	2.14419	2.11169	1.74	-0.83	-0.553	0.027	0.794	97
R14_11_Cat05_T298	298	100	0.17	27.57	-0.599	-0.123	-0.201	1712.45	5.27725	1.7	7.69076	7.88612	1.7	5.00657	40.8	79.18	2.14419	2.11169	1.74	-0.83	-0.553	0.027	0.794	97
R14_19_Cat05_T298	298	100	0.17	27.57	-0.545	-0.12	-0.151	1730.8	5.20018	1.7	7.70572	9.17348	1.7	3.39019	40.8	79.18	2.14419	2.11169	1.74	-0.83	-0.553	0.027	0.794	97
R14_22_Cat05_T298	298	100	0.17	27.57	-0.55	-0.107	-0.118	1716.46	5.18219	1.7	7.70466	6.56838	1.7	6.31153	40.8	79.18	2.14419	2.11169	1.74	-0.83	-0.553	0.027	0.794	97
R17_05_Cat08_T298	298	100	0.17	27.57	-0.574	0.347	-0.379	1764.39	8.24381	1.7	6.0356	5.05505	2.35305	5.60158	48.7	79.18	2.14419	2.11169	1.85	-0.897	-0.576	0.237	0.819	97
R17_06_Cat08_T298	298	100	0.17	27.57	-0.575	0.347	-0.379	1763.93	8.80192	1.83	6.17322	5.05604	2.34836	5.60114	48.7	79.18	2.14419	2.11169	1.85	-0.897	-0.576	0.237	0.819	97
R17_09_Cat08_T298	298	100	0.17	27.57	-0.572	0.325	-0.383	1725.93	8.77468	1.83	6.13079	4.37594	1.7	4.30191	48.7	79.18	2.14419	2.11169	1.85	-0.897	-0.576	0.237	0.819	97
R19_13_Cat09_T298	298	100	0.17	27.57	-0.466	-0.084	-0.113	1672.86	6.15321	1.75969	6.63492	3.45828	1.7	6.28568	43.2	73.83	2.1406	2.13939	1.74	-0.836	-0.567	-0.005	0.799	97
R20_06_Cat12_T323	323	100	-0.14	72.3	-0.612	-0.163	-0.345	1766.69	4.53752	2.1442	6.52844	3.25301	1.96025	3.238	48.1	78.41	2.18974	2.12848	1.74	-0.851	-0.737	0.032	0.784	97
R20_17_Cat12_T323	323	100	-0.14	72.3	-0.61	-0.164	-0.345	1767.34	6.08804	1.94457	4.53159	3.25205	1.96422	3.23855	48.1	78.41	2.18974	2.12848	1.74	-0.851	-0.737	0.032	0.784	97
R22_10_Cat13_T333	333	100	0.17	27.57	-0.61	-0.117	-0.134	1713.57	5.69138	1.7	5.21033	3.25799	2.45984	3.28713	42.8	78.79	2.11552	2.15028	1.82	-0.833	-0.745	-0.265	0.706	97
R8_05_Cat08_T303	303	100	0.17	27.57	-0.595	-0.206	-0.564	1759.45	8.00518	1.73766	5.40408	6.36523	1.7	6.23763	48.7	79.18	2.14419	2.11169	1.85	-0.897	-0.576	0.237	0.819	97
R17_19_Cat08_T298	298	100	0.17	27.57	-0.566	0.325	-0.376	1730.41	8.77466	1.83	6.13088	4.37603	1.7	4.30188	48.7	79.18	2.14419	2.11169	1.85	-0.897	-0.576	0.237	0.819	97
R22_01_Cat13_T313	313	1000	0.17	27.57	-0.666	-0.234	-0.777	1619.91	6.35738	1.7	4.77293	2.1816	1.7	2.13377	42.9	78.77	2.11587	2.15011	1.82	-0.833	-0.745	-0.265	0.706	97.2
R22_03_Cat13_T333	333	1000	0.17	27.57	-0.629	-0.146	-0.79	1702.23	5.69113	1.7	5.59703	2.18266	1.7	2.13642	42.8	78.79	2.11552	2.15028	1.82	-0.833	-0.745	-0.265	0.706	97.2
R22_06_Cat13_T333	333	1000	0.17	27.57	-0.628	-0.129	-0.791	1702.78	8.40574	1.7	4.47101	2.18291	1.7	2.13662	42.8	78.79	2.11552	2.15028	1.82	-0.833	-0.745	-0.265	0.706	97.6
R07_05_Cat05_T300	300	100	0.17	27.57	-0.57	-0.142	-0.171	1770.86	8.04794	2.38088	3.75259	3.41848	1.7	4.95522	40.8	77.14	2.15921	2.15291	1.74	-0.83	-0.553	0.027	0.794	97.7
R22_03_Cat13_T313	313	1000	0.17	27.57	-0.63	-0.146	-0.79	1701.58	5.69119	1.7	5.59707	2.18267	1.7	2.13638	42.9	78.77	2.11587	2.15011	1.82	-0.833	-0.745	-0.265	0.706	97.8
R22_09_Cat13_T333	333	1000	0.17	27.57	-0.62	-0.131	-0.555	1702.82	5.6916	1.7	5.21106	3.27892	1.7	2.70349	42.8	78.79	2.11552	2.15028	1.82	-0.833	-0.745	-0.265	0.706	97.8
R01_01_Cat01_T301	301	200	0.17	27.57	-0.628	-0.167	-0.789	1712.59	3.4506	1.7	4.96223	2.18487	1.7	2.13562	42.2	77.79	2.14262	2.12838	1.73	-0.863	-0.742	0.027	0.796	98
R01_04_Cat01_T301	301	200	0.17	27.57	-0.626	-0.153	-0.789	1713.83	6.45363	1.7	4.13179	2.1849	1.7	2.13593	42.2	77.79	2.14262	2.12838	1.73	-0.863	-0.742	0.027	0.796	98
R01_10_Cat01_T333	333	200	0.17	27.57	-0.636	-0.172	-0.556	1709.68	4.96602	1.70368	3.24998	4.08674	1.7	3.17913	42.2	78.62	2.11968	2.13272	1.73	-0.87	-0.742	0.025	0.796	98
R01_11_Cat01_T301	301	200	0.17	27.57	-0.628	-0.345	-0.789	1694.37	4.63553	1.75942	3.4572	2.18543	1.7	2.13474	42.2	77.79	2.14262	2.12838	1.73	-0.863	-0.742	0.027	0.796	98
R03_03_Cat04_T303	303	100	0.17	27.57	-0.54	-0.222	-0.568	1802.39	18.5248	1.95828	3.72095	8.61503	2.47082	5.73712	41.4	78.61	2.15133	2.13191	1.74	-0.843	-0.741	0.025	0.783	98
R03_10_Cat04_T303	303	100	0.17	27.57	-0.524	-0.221	-0.559	1836.1	8.73022	2.73038	6.84276	5.30508	1.91161	3.54484	41.4	78.61	2.15133	2.13191	1.74	-0.843	-0.741	0.025	0.783	98
R03_13_Cat04_T303	303	100	0.17	27.57	-0.551	0.646	-0.186	1754.47	10.866	1.7	3.69161	6.54849	1.7	3.8034	41.4	78.61	2.15133	2.13191	1.74	-0.843	-0.741	0.025	0.783	98
R03_14_Cat04_T303	303	100	0.17	27.57	-0.528	0.641	-0.567	1830.04	6.1144	1.7	5.91963	6.55113	1.7	3.79728	41.4	78.61	2.15133	2.13191	1.74	-0.843	-0.741	0.025	0.783	98
R03_16_Cat04_T303	303	100	0.17	27.57	-0.534	-0.206	-0.794	1807.52	6.89326	2.20359	8.44749	2.18573	1.7	2.13297	41.4	78.61	2.15133	2.13191	1.74	-0.843	-0.741	0.025	0.783	98
R06_01_Cat06_T333	333	100	0.17	27.57	0.619	-0.147	-0.155	1684.14	4.10739	1.7	4.94246	3.44162	1.7	4.9621	40.6	74.88	2.15667	2.17608	1.73	-0.875	-0.57	0.041	0.809	98
R06_02_Cat06_T313	313	100	0.17	27.57	-0.597	-0.157	-0.162	1701.7	4.50646	1.7	4.97278	3.44032	1.7	4.95942	40.6	74.85	2.15734	2.17588	1.73	-0.875	-0.57	0.042	0.809	98
R06_06_Cat06_T333	333	100	0.17	27.57	-0.623	-0.153	-0.156	1681.64	7.04679	1.95568	4.59351	3.44146	1.7	4.96272	40.6	74.88	2.15667	2.17608	1.73	-0.875	-0.57	0.041	0.809	98
R09_01_Cat09_T298	298	100	0.17	27.57	-0.58	-0.165	-0.58	1750.46	5.32257	1.7	5.54273	3.44856	1.7	4.96253	43.2	73.83	2.1406	2.13939	1.74	-0.836	-0.567	-0.005	0.799	98
R12_10_Cat08_T323	323	200	-0.327467	27.0267	-0.599	-0.15	-0.218	1736.64	8.64661	1.7	6.11147	3.4206	1.7	4.96301	48.2	79.02	2.1505	2.11373	1.92	-0.901	-0.575	0.24	0.817	98
R13_19_Cat05_T298	298	67	0.17	27.57	-0.534	0.626	-0.65	1800.05	6.80863	1.7	4.81051	6.27516	1.7	5.21224	40.8	79.18	2.14419	2.11169	1.74	-0.83	-0.553	0.027	0.794	98
R13_23_Cat05_T298	298	67	0.17	27.57	-0.552	0.599	-0.638	1811.36	6.05902	1.81664	5.15483	5.5537	1.7	3.78918	40.8	79.18	2.14419	2.11169	1.74	-0.83	-0.553	0.027	0.794	98
R13_25_Cat05_T298	298	67	0.17	27.57	-0.523	0.757	-0.643	1831.28	6.10636	1.8238	5.17707	5.19782	1.7	3.16348	40.8	79.18	2.14419	2.11169	1.74	-0.83	-0.553	0.027	0.794	98
R13_26_Cat05_T298	298	67	0.17	27.57	-0.531	0.616	-0.657	1811.12	6.46347	2.40139	6.99979	6.53826	1.7	3.79388	40.8	79.18	2.14419	2.11169	1.74	-0.83	-0.553	0.027	0.794	98
R14_07_Cat05_T298	298	100	0.17	27.57	-0.586	-0.128	-0.183	1725.61	5.23815	1.7	7.68581	6.89216	1.7	4.01954	40.8	79.18	2.14419	2.11169	1.74	-0.83	-0.553	0.027	0.794	98
R17_10_Cat08_T298	298	100	0.17	27.57	-0.575	0.325	-0.388	1722.71	6.14022	1.7	9.36798	4.37601	1.7	4.30222	48.7	79.18	2.14419	2.11169	1.85	-0.897	-0.576	0.237	0.819	98
R17_13_Cat08_T298	298	100	0.17	27.57	-0.573	0.325	-0.386	1724.01	6.14208	1.7	8.39288	4.37582	1.7	4.30226	48.7	79.18	2.14419	2.11169	1.85	-0.897	-0.576	0.237	0.819	98
R17_14_Cat08_T298	298	100	0.17	27.57	-0.57	0.325	-0.382	1727.54	6.14893	1.7	7.28613	4.37589	1.7	4.30202	48.7	79.18	2.14419	2.11169	1.85	-0.897	-0.576	0.237	0.819	98
R17_16_Cat08_T298	298	100	0.17	27.57	-0.569	0.325	-0.38	1727.32	6.14723	1.7	9.29898	4.37572	1.7	4.30186	48.7	79.18	2.14419	2.11169	1.85	-0.897	-0.576	0.237	0.819	98
R17_22_Cat08_T298	298	100	0.17	27.57	-0.556	0.326	-0.336	1739.6	6.80395	1.7	5.9318	4.35986	1.7	4.3064	48.7	79.18	2.14419	2.11169	1.85	-0.897	-0.576	0.237	0.819	98
R20_07_Cat12_T323	323	100	-0.14	72.3	-0.616	-0.162	-0.345	1763.65	4.74818	1.76048	7.16705	3.25208	1.9683	3.23771	48.1	78.41	2.18974	2.12848	1.74	-0.851	-0.737	0.032	0.784	98
R20_10_Cat12_T323	323	100	-0.14	72.3	-0.615	-0.162	-0.345	1764.47	4.17826	1.76248	8.70042	3.25189	1.96872	3.2382	48.1	78.41	2.18974	2.12848	1.74	-0.851	-0.737	0.032	0.784	98
R20_15_Cat12_T323	323	100	-0.14	72.3	-0.617	-0.162	-0.345	1763.23	8.60119	2.99876	4.57315	3.25196	1.97327	3.23816	48.1	78.41	2.18974	2.12848	1.74	-0.851	-0.737	0.032	0.784	98
R21_05_Cat08_T298	298	100	0.17	27.57	-0.537	-0.167	-0.438	1783.84	6.42528	1.7	5.97219	3.45787	1.7	4.9582	48.2	79.31	2.13151	2.10479	1.85	-0.892	-0.575	0.229	0.825	98
R22_08_Cat13_T333	333	1000	0.17	27.57	-0.626	-0.128	-0.791	1708.84	6.56276	1.7	5.87202	2.1833	1.7	2.13643	42.8	78.79	2.11552	2.15028	1.82	-0.833	-0.745	-0.265	0.706	98.1
R22_12_Cat13_T333	333	1000	0.17	27.57	-0.613	-0.141	-0.656	1701.72	5.69092	1.7	5.26292	5.26719	1.7	3.03538	42.8	78.79	2.11552	2.15028	1.82	-0.833	-0.745	-0.265	0.706	98.1
R22_12_Cat13_T313	313	1000	0.17	27.57	-0.614	-0.141	-0.656	1701.04	5.69095	1.7	5.26301	5.26733	1.7	3.0357	42.9	78.77	2.11587	2.15011	1.82	-0.833	-0.745	-0.265	0.706	98.2
R22_04_Cat13_T333	333	1000	0.17	27.57	-0.632	-0.142	-0.79	1697.49	5.96879	1.7	5.68281	2.18284	1.7	2.13645	42.8	78.79	2.11552	2.15028	1.82	-0.833	-0.745	-0.265	0.706	98.4
R03_09_Cat04_T303	303	100	0.17	27.57	-0.524	-0.221	-0.568	1836.06	7.10367	1.97219	2.81868	5.30057	2.50938	3.54686	41.4	78.61	2.15133	2.13191	1.74	-0.843	-0.741	0.025	0.783	98.5
R03_15_Cat04_T303	303	100	0.17	27.57	-0.551	-0.209	-0.794	1803.08	7.90183	1.7	6.03574	2.18068	1.7	2.12737	41.4	78.61	2.15133	2.13191	1.74	-0.843	-0.741	0.025	0.783	98.5
R22_11_Cat13_T333	333	1000	0.17	27.57	-0.614	-0.134	-0.561	1708.41	5.34014	1.7	5.69861	5.68885	1.7	5.23879	42.8	78.79	2.11552	2.15028	1.82	-0.833	-0.745	-0.265	0.706	98.5
R05_13_Cat07_T333	333	200	0.17	27.57	-0.596	-0.16	-0.441	1718.19	4.21169	2.45948	5.49983	3.4401	1.7	4.96432	40.1	75.28	2.14546	2.17619	1.73	-0.875	-0.57	0.038	0.799	98.9
R01_09_Cat01_T301	301	200	0.17	27.57	-0.635	-0.172	-0.559	1731.74	3.3693	1.7	4.92688	3.2923	1.7	2.70126	42.2	77.79	2.14262	2.12838	1.73	-0.863	-0.742	0.027	0.796	99
R01_10_Cat01_T301	301	200	0.17	27.57	-0.638	-0.172	-0.556	1708.71	4.96607	1.70368	3.25001	4.08672	1.7	3.17919	42.2	77.79	2.14262	2.12838	1.73	-0.863	-0.742	0.027	0.796	99
R03_01_Cat04_T303	303	100	0.17	27.57	-0.534	-0.227	-0.797	1809.77	8.59873	2.48022	5.77867	2.18064	1.7	2.12682	41.4	78.61	2.15133	2.13191	1.74	-0.843	-0.741	0.025	0.783	99
R03_02_Cat04_T303	303	100	0.17	27.57	-0.537	-0.223	-0.569	1802.19	8.66897	2.59896	5.72223	5.47698	1.82343	3.0975	41.4	78.61	2.15133	2.13191	1.74	-0.843	-0.741	0.025	0.783	99
R03_04_Cat04_T303	303	100	0.17	27.57	-0.54	-0.221	-0.573	1801.31	8.60028	2.45013	5.73917	4.08429	1.73689	4.07989	41.4	78.61	2.15133	2.13191	1.74	-0.843	-0.741	0.025	0.783	99
R03_05_Cat04_T303	303	100	0.17	27.57	-0.527	-0.221	-0.794	1839.8	6.33473	2.15605	5.05593	2.18211	1.7	2.13138	41.4	78.61	2.15133	2.13191	1.74	-0.843	-0.741	0.025	0.783	99
R03_06_Cat04_T303	303	100	0.17	27.57	-0.524	-0.225	-0.795	1840.86	7.49176	2.12624	3.54453	2.18565	1.7	2.12727	41.4	78.61	2.15133	2.13191	1.74	-0.843	-0.741	0.025	0.783	99
R03_07_Cat04_T303	303	100	0.17	27.57	-0.525	-0.22	-0.558	1835.12	6.0955	1.7	5.92737	7.49565	1.9711	3.58231	41.4	78.61	2.15133	2.13191	1.74	-0.843	-0.741	0.025	0.783	99
R03_08_Cat04_T303	303	100	0.17	27.57	-0.528	-0.219	-0.567	1834.94	6.58417	2.78298	3.75931	4.10525	1.73007	3.17979	41.4	78.61	2.15133	2.13191	1.74	-0.843	-0.741	0.025	0.783	99
R06_03_Cat06_T333	333	100	0.17	27.57	-0.588	-0.155	-0.164	1707.26	4.71901	1.71927	4.97066	3.43884	1.7	4.95878	40.6	74.88	2.15667	2.17608	1.73	-0.875	-0.57	0.041	0.809	99
R06_04_Cat06_T333	333	100	0.17	27.57	-0.6	-0.107	-0.163	1701.6	4.92829	2.0388	4.96784	3.43953	1.7	4.95898	40.6	74.88	2.15667	2.17608	1.73	-0.875	-0.57	0.041	0.809	99
R06_07_Cat06_T303	303	100	0.17	27.57	-0.594	-0.153	-0.163	1703.57	4.50214	1.7	6.28182	3.44093	1.7	4.95863	40.6	74.86	2.15724	2.17605	1.73	-0.875	-0.57	0.042	0.809	99
R06_08_Cat06_T313	313	100	0.17	27.57	-0.585	-0.138	-0.166	1708.96	5.18329	1.7	5.35627	3.44167	1.7	4.95722	40.6	74.85	2.15734	2.17588	1.73	-0.875	-0.57	0.042	0.809	99
R06_11_Cat06_T333	333	100	0.17	27.57	-0.583	-0.164	-0.246	1706.17	3.93574	1.7	5.61097	3.44077	1.7	4.95605	40.6	74.88	2.15667	2.17608	1.73	-0.875	-0.57	0.041	0.809	99
R06_20_Cat06_T303	303	100	0.17	27.57	-0.612	-0.129	-0.155	1690.39	5.17632	1.7	5.75124	3.44472	1.7	4.95781	40.6	74.86	2.15724	2.17605	1.73	-0.875	-0.57	0.042	0.809	99
R06_25_Cat06_T303	303	100	0.17	27.57	-0.62	-0.096	-0.189	1681.2	5.17823	1.7	5.75391	6.88468	1.7	4.02323	40.6	74.86	2.15724	2.17605	1.73	-0.875	-0.57	0.042	0.809	99
R12_01_Cat08_T323	323	200	-0.327467	27.0267	-0.606	-0.165	-0.215	1732.13	9.32649	1.7	4.66281	3.42059	1.7	4.96369	48.2	79.02	2.1505	2.11373	1.92	-0.901	-0.575	0.24	0.817	99
R12_02_Cat08_T323	323	200	-0.327467	27.0267	-0.599	-0.153	-0.218	1737.28	7.40157	1.7	6.44078	3.42049	1.7	4.96307	48.2	79.02	2.1505	2.11373	1.92	-0.901	-0.575	0.24	0.817	99
R12_04_Cat08_T323	323	200	-0.327467	27.0267	-0.602	-0.157	-0.217	1735.45	8.4062	1.91611	4.13695	3.42082	1.7	4.96338	48.2	79.02	2.1505	2.11373	1.92	-0.901	-0.575	0.24	0.817	99
R12_05_Cat08_T323	323	200	-0.327467	27.0267	-0.6	-0.154	-0.218	1737.37	6.82956	1.7	6.0557	3.42086	1.7	4.96317	48.2	79.02	2.1505	2.11373	1.92	-0.901	-0.575	0.24	0.817	99
R12_06_Cat08_T323	323	200	-0.327467	27.0267	-0.595	-0.139	-0.219	1740.75	7.76275	1.7	6.67434	3.42076	1.7	4.96262	48.2	79.02	2.1505	2.11373	1.92	-0.901	-0.575	0.24	0.817	99
R12_07_Cat08_T323	323	200	-0.327467	27.0267	-0.596	-0.143	-0.219	1740.11	7.56755	1.7	6.05225	3.42078	1.7	4.96262	48.2	79.02	2.1505	2.11373	1.92	-0.901	-0.575	0.24	0.817	99
R12_08_Cat08_T323	323	200	-0.327467	27.0267	-0.591	-0.126	-0.22	1741.54	7.932	1.7	6.62554	3.42085	1.7	4.96223	48.2	79.02	2.1505	2.11373	1.92	-0.901	-0.575	0.24	0.817	99
R12_09_Cat08_T323	323	200	-0.327467	27.0267	-0.607	-0.168	-0.215	1731.18	7.48702	1.7	6.4448	3.42011	1.7	4.96363	48.2	79.02	2.1505	2.11373	1.92	-0.901	-0.575	0.24	0.817	99
R12_11_Cat08_T323	323	200	-0.327467	27.0267	-0.607	-0.157	-0.216	1735.46	6.22189	1.91612	4.57663	3.42114	1.7	4.96395	48.2	79.02	2.1505	2.11373	1.92	-0.901	-0.575	0.24	0.817	99
R12_12_Cat08_T323	323	200	-0.327467	27.0267	-0.6	-0.152	-0.218	1736.55	11.2698	1.7	5.8855	3.4203	1.7	4.96297	48.2	79.02	2.1505	2.11373	1.92	-0.901	-0.575	0.24	0.817	99
R12_13_Cat08_T323	323	200	-0.327467	27.0267	-0.61	-0.172	-0.216	1731.67	10.3912	1.8965	5.8446	3.42146	1.7	4.96487	48.2	79.02	2.1505	2.11373	1.92	-0.901	-0.575	0.24	0.817	99
R13_20_Cat05_T298	298	67	0.17	27.57	-0.553	0.609	-0.652	1793.26	6.44696	2.12728	6.50202	6.2544	1.7	5.20055	40.8	79.18	2.14419	2.11169	1.74	-0.83	-0.553	0.027	0.794	99
R14_01_Cat05_T298	298	100	0.17	27.57	-0.578	-0.13	-0.161	1730.99	5.27338	1.7	7.6888	5.93476	1.7	3.55584	40.8	79.18	2.14419	2.11169	1.74	-0.83	-0.553	0.027	0.794	99
R14_03_Cat05_T298	298	100	0.17	27.57	-0.578	-0.13	-0.159	1731.14	5.23249	1.7	7.69042	7.05011	1.7	5.08037	40.8	79.18	2.14419	2.11169	1.74	-0.83	-0.553	0.027	0.794	99
R14_04_Cat05_T298	298	100	0.17	27.57	-0.578	-0.13	-0.16	1731.53	5.24653	1.7	7.69069	7.05647	1.7	4.59419	40.8	79.18	2.14419	2.11169	1.74	-0.83	-0.553	0.027	0.794	99
R14_13_Cat05_T298	298	100	0.17	27.57	-0.576	0.188	-0.128	1728.16	5.16299	1.7	7.70614	4.28733	1.7	3.617	40.8	79.18	2.14419	2.11169	1.74	-0.83	-0.553	0.027	0.794	99
R14_14_Cat05_T298	298	100	0.17	27.57	-0.573	-0.13	-0.329	1721.98	5.25996	1.7	7.70244	4.63765	1.75709	3.45819	40.8	79.18	2.14419	2.11169	1.74	-0.83	-0.553	0.027	0.794	99
R14_20_Cat05_T298	298	100	0.17	27.57	-0.535	-0.106	-0.123	1733.09	4.23243	1.7	7.7124	5.91482	1.7	5.24849	40.8	79.18	2.14419	2.11169	1.74	-0.83	-0.553	0.027	0.794	99
R15_01_Cat08_T273	273	200	0.17	27.57	-0.561	-0.167	-0.24	1759.02	6.7877	2.92586	5.49335	3.47169	1.7	4.96024	48.7	79.18	2.14419	2.11169	1.85	-0.903	-0.574	0.237	0.819	99
R15_02_Cat08_T273	273	200	0.17	27.57	-0.563	-0.162	-0.239	1757.61	6.7685	2.94612	5.46764	5.38293	1.70488	4.47316	48.7	79.18	2.14419	2.11169	1.85	-0.903	-0.574	0.237	0.819	99
R15_03_Cat08_T273	273	200	0.17	27.57	-0.567	-0.177	-0.239	1754.57	6.77796	2.93806	5.46165	5.93137	1.7	3.53376	48.7	79.18	2.14419	2.11169	1.85	-0.903	-0.574	0.237	0.819	99
R15_04_Cat08_T273	273	200	0.17	27.57	-0.563	-0.163	-0.239	1752.4	6.78104	2.93047	5.48435	6.75467	1.70592	5.31031	48.7	79.18	2.14419	2.11169	1.85	-0.903	-0.574	0.237	0.819	99
R15_05_Cat08_T273	273	200	0.17	27.57	-0.577	-0.199	-0.238	1745.91	6.78591	2.92116	5.45257	6.88933	1.7	4.01875	48.7	79.18	2.14419	2.11169	1.85	-0.903	-0.574	0.237	0.819	99
R15_06_Cat08_T273	273	200	0.17	27.57	-0.573	-0.178	-0.239	1749.07	6.11337	1.7	5.97277	6.28636	1.7	4.1241	48.7	79.18	2.14419	2.11169	1.85	-0.903	-0.574	0.237	0.819	99
R15_07_Cat08_T273	273	200	0.17	27.57	-0.564	-0.18	-0.239	1758.62	6.77651	2.93756	5.45682	3.47466	1.7	5.56929	48.7	79.18	2.14419	2.11169	1.85	-0.903	-0.574	0.237	0.819	99
R15_08_Cat08_T273	273	200	0.17	27.57	-0.559	-0.165	-0.239	1759.84	6.76947	2.94538	5.44423	3.48566	1.7	6.26874	48.7	79.18	2.14419	2.11169	1.85	-0.903	-0.574	0.237	0.819	99
R15_09_Cat08_T273	273	200	0.17	27.57	-0.559	-0.164	-0.239	1760.04	6.7714	2.93032	5.45973	3.4853	1.7	6.50075	48.7	79.18	2.14419	2.11169	1.85	-0.903	-0.574	0.237	0.819	99
R15_10_Cat08_T273	273	200	0.17	27.57	-0.544	-0.16	-0.236	1775.5	6.78335	2.9013	5.50492	4.53383	1.74317	4.89333	48.7	79.18	2.14419	2.11169	1.85	-0.903	-0.574	0.237	0.819	99
R15_11_Cat08_T273	273	200	0.17	27.57	-0.55	0.094	-0.235	1785.74	6.77591	2.93528	5.45098	3.35308	1.7	4.89532	48.7	79.18	2.14419	2.11169	1.85	-0.903	-0.574	0.237	0.819	99
R15_12_Cat08_T273	273	200	0.17	27.57	-0.554	-0.198	-0.241	1765.79	6.11747	1.7	5.97466	3.26557	1.7	4.86864	48.7	79.18	2.14419	2.11169	1.85	-0.903	-0.574	0.237	0.819	99
R15_13_Cat08_T273	273	200	0.17	27.57	-0.547	0.121	-0.235	1784.99	6.76992	2.93602	5.46174	6.62318	1.70983	5.28441	48.7	79.18	2.14419	2.11169	1.85	-0.903	-0.574	0.237	0.819	99
R15_14_Cat08_T273	273	200	0.17	27.57	-0.572	0.189	-0.232	1746.31	8.00331	1.88968	5.90606	3.93024	1.7	4.30334	48.7	79.18	2.14419	2.11169	1.85	-0.903	-0.574	0.237	0.819	99
R15_16_Cat08_T273	273	200	0.17	27.57	-0.569	-0.237	-0.569	1796.1	8.01049	1.7	5.91023	6.87263	1.76043	3.55073	48.7	79.18	2.14419	2.11169	1.85	-0.903	-0.574	0.237	0.819	99
R15_17_Cat08_T273	273	200	0.17	27.57	-0.564	-0.247	-0.55	1792.69	7.99948	1.7	5.91765	6.01123	1.7	5.9893	48.7	79.18	2.14419	2.11169	1.85	-0.903	-0.574	0.237	0.819	99
R15_18_Cat08_T273	273	200	0.17	27.57	-0.577	-0.238	-0.339	1791.39	7.97085	1.7	5.93302	3.25975	1.7	3.25998	48.7	79.18	2.14419	2.11169	1.85	-0.903	-0.574	0.237	0.819	99
R15_19_Cat08_T273	273	200	0.17	27.57	-0.536	-0.166	-0.225	1751.55	8.03042	1.7	5.89304	9.09407	1.7	3.35147	48.7	79.18	2.14419	2.11169	1.85	-0.903	-0.574	0.237	0.819	99
R17_07_Cat08_T298	298	100	0.17	27.57	-0.572	0.347	-0.373	1767.17	6.14587	1.7	7.20774	4.37561	1.7	4.30207	48.7	79.18	2.14419	2.11169	1.85	-0.897	-0.576	0.237	0.819	99
R17_11_Cat08_T298	298	100	0.17	27.57	-0.569	0.325	-0.38	1728.28	8.79912	1.7	6.06682	4.37574	1.7	4.30215	48.7	79.18	2.14419	2.11169	1.85	-0.897	-0.576	0.237	0.819	99
R17_12_Cat08_T298	298	100	0.17	27.57	-0.572	0.325	-0.408	1729.05	6.32411	2.60263	6.24043	4.37592	1.7	4.30424	48.7	79.18	2.14419	2.11169	1.85	-0.897	-0.576	0.237	0.819	99
R17_21_Cat08_T298	298	100	0.17	27.57	-0.56	0.326	-0.357	1737.3	6.66304	1.7	6.04455	4.35727	1.7	4.30934	48.7	79.18	2.14419	2.11169	1.85	-0.897	-0.576	0.237	0.819	99
R20_01_Cat12_T323	323	100	-0.14	72.3	-0.618	-0.163	-0.345	1762.02	9.22827	2.8178	4.42958	3.25266	1.96998	3.23773	48.1	78.41	2.18974	2.12848	1.74	-0.851	-0.737	0.032	0.784	99
R20_02_Cat12_T323	323	100	-0.14	72.3	-0.617	-0.163	-0.345	1762.54	7.71875	2.51989	5.37947	3.25228	1.96647	3.23801	48.1	78.41	2.18974	2.12848	1.74	-0.851	-0.737	0.032	0.784	99
R20_03_Cat12_T323	323	100	-0.14	72.3	-0.618	-0.162	-0.345	1762.37	8.36125	2.7996	4.44096	3.25243	1.96844	3.23795	48.1	78.41	2.18974	2.12848	1.74	-0.851	-0.737	0.032	0.784	99
R20_04_Cat12_T323	323	100	-0.14	72.3	-0.616	-0.161	-0.345	1763.98	8.54447	2.36594	6.27766	3.25147	1.97012	3.23872	48.1	78.41	2.18974	2.12848	1.74	-0.851	-0.737	0.032	0.784	99
R20_05_Cat12_T323	323	100	-0.14	72.3	-0.605	-0.163	-0.346	1772.41	5.5425	3.00423	6.67623	3.24916	2.00389	3.24334	48.1	78.41	2.18974	2.12848	1.74	-0.851	-0.737	0.032	0.784	99
R20_08_Cat12_T323	323	100	-0.14	72.3	-0.617	-0.162	-0.345	1762.54	11.1582	2.13826	5.70373	3.25199	1.97112	3.23829	48.1	78.41	2.18974	2.12848	1.74	-0.851	-0.737	0.032	0.784	99
R20_09_Cat12_T323	323	100	-0.14	72.3	-0.617	-0.163	-0.345	1762.81	4.17149	1.76697	7.77143	3.2523	1.96383	3.23776	48.1	78.41	2.18974	2.12848	1.74	-0.851	-0.737	0.032	0.784	99
R20_12_Cat12_T323	323	100	-0.14	72.3	-0.617	-0.162	-0.345	1763.47	8.03622	2.30095	8.03292	3.2519	1.97069	3.23808	48.1	78.41	2.18974	2.12848	1.74	-0.851	-0.737	0.032	0.784	99
R20_13_Cat12_T323	323	100	-0.14	72.3	-0.617	-0.163	-0.345	1762.87	9.31916	2.44154	4.76219	3.25211	1.96726	3.2382	48.1	78.41	2.18974	2.12848	1.74	-0.851	-0.737	0.032	0.784	99
R20_14_Cat12_T323	323	100	-0.14	72.3	-0.615	-0.161	-0.345	1764.82	6.02608	2.64709	8.86555	3.25325	1.95839	3.23814	48.1	78.41	2.18974	2.12848	1.74	-0.851	-0.737	0.032	0.784	99
R20_16_Cat12_T323	323	100	-0.14	72.3	-0.616	-0.169	-0.345	1763.98	8.22171	1.7	6.57702	3.25064	1.98595	3.23947	48.1	78.41	2.18974	2.12848	1.74	-0.851	-0.737	0.032	0.784	99
R20_18_Cat12_T323	323	100	-0.14	72.3	-0.616	-0.16	-0.345	1763.43	7.86671	2.8013	4.39519	3.25235	1.96664	3.23796	48.1	78.41	2.18974	2.12848	1.74	-0.851	-0.737	0.032	0.784	99
R21_01_Cat08_T298	298	100	0.17	27.57	-0.543	-0.164	-0.439	1775.83	3.46157	1.7	4.96089	3.27123	1.7	4.16105	48.2	79.31	2.13151	2.10479	1.85	-0.892	-0.575	0.229	0.825	99
R21_02_Cat08_T298	298	100	0.17	27.57	-0.548	-0.164	-0.432	1768.7	3.46285	1.7	4.96137	4.12816	1.7	3.17132	48.2	79.31	2.13151	2.10479	1.85	-0.892	-0.575	0.229	0.825	99
R21_03_Cat08_T298	298	100	0.17	27.57	-0.544	-0.162	-0.441	1770.89	3.46075	1.7	4.96121	4.11717	2.05654	4.06512	48.2	79.31	2.13151	2.10479	1.85	-0.892	-0.575	0.229	0.825	99
R21_04_Cat08_T298	298	100	0.17	27.57	-0.551	-0.167	-0.443	1753.12	4.09888	2.05863	4.40737	3.46786	1.7	4.96376	48.2	79.31	2.13151	2.10479	1.85	-0.892	-0.575	0.229	0.825	99
R21_06_Cat08_T298	298	100	0.17	27.57	-0.544	-0.163	-0.443	1771.85	5.35054	1.7	5.69685	3.45688	1.7	4.95935	48.2	79.31	2.13151	2.10479	1.85	-0.892	-0.575	0.229	0.825	99
R21_07_Cat08_T298	298	100	0.17	27.57	-0.545	-0.169	-0.446	1667.38	8.06161	1.72919	5.96148	3.45649	1.7	4.95846	48.2	79.31	2.13151	2.10479	1.85	-0.892	-0.575	0.229	0.825	99
R21_08_Cat08_T298	298	100	0.17	27.57	-0.545	-0.176	-0.44	1769.85	3.45915	1.7	5.57141	4.11692	2.05873	4.06455	48.2	79.31	2.13151	2.10479	1.85	-0.892	-0.575	0.229	0.825	99
R21_09_Cat08_T298	298	100	0.17	27.57	-0.54	-0.161	-0.441	1772.06	3.46833	1.7	6.50259	4.11694	2.05229	4.07152	48.2	79.31	2.13151	2.10479	1.85	-0.892	-0.575	0.229	0.825	99
R21_10_Cat08_T298	298	100	0.17	27.57	-0.534	-0.144	-0.441	1777.13	3.45895	1.7	6.40293	4.11658	2.05155	4.06849	48.2	79.31	2.13151	2.10479	1.85	-0.892	-0.575	0.229	0.825	99
R21_11_Cat08_T298	298	100	0.17	27.57	-0.548	-0.171	-0.44	1766.74	5.93199	1.7	3.55657	4.11746	2.05403	4.06554	48.2	79.31	2.13151	2.10479	1.85	-0.892	-0.575	0.229	0.825	99
R21_12_Cat08_T298	298	100	0.17	27.57	-0.557	-0.193	-0.439	1760.1	6.88814	1.7	4.0198	4.11783	2.05393	4.06762	48.2	79.31	2.13151	2.10479	1.85	-0.892	-0.575	0.229	0.825	99
R21_13_Cat08_T298	298	100	0.17	27.57	-0.542	-0.144	-0.441	1770.98	6.1496	1.7	4.66334	4.11791	2.05992	4.06515	48.2	79.31	2.13151	2.10479	1.85	-0.892	-0.575	0.229	0.825	99
R21_14_Cat08_T298	298	100	0.17	27.57	-0.542	-0.146	-0.439	1775.38	6.14845	1.7	4.66183	3.27101	1.7	4.16139	48.2	79.31	2.13151	2.10479	1.85	-0.892	-0.575	0.229	0.825	99
R21_15_Cat08_T298	298	100	0.17	27.57	-0.557	-0.176	-0.439	1758.09	6.88163	1.7	6.21101	4.11909	2.0559	4.07563	48.2	79.31	2.13151	2.10479	1.85	-0.892	-0.575	0.229	0.825	99
R21_16_Cat08_T298	298	100	0.17	27.57	-0.544	-0.157	-0.44	1765.51	6.75634	1.7	5.30891	4.11737	2.06022	4.06435	48.2	79.31	2.13151	2.10479	1.85	-0.892	-0.575	0.229	0.825	99
R21_17_Cat08_T298	298	100	0.17	27.57	-0.547	-0.34	-0.431	1756.11	4.10444	1.7	4.07415	4.63199	1.75716	3.45681	48.2	79.31	2.13151	2.10479	1.85	-0.892	-0.575	0.229	0.825	99
R21_18_Cat08_T298	298	100	0.17	27.57	-0.545	0.176	-0.438	1763.22	4.11278	1.7	4.08975	4.28425	1.7	3.61628	48.2	79.31	2.13151	2.10479	1.85	-0.892	-0.575	0.229	0.825	99
R21_19_Cat08_T298	298	100	0.17	27.57	-0.536	0.096	-0.447	1789.21	4.35311	1.7	4.43444	4.11495	1.7	4.10617	48.2	79.31	2.13151	2.10479	1.85	-0.892	-0.575	0.229	0.825	99
R21_20_Cat08_T298	298	100	0.17	27.57	-0.564	0.057	-0.427	1735.11	6.23446	1.74058	5.3573	4.14082	1.7	4.13948	48.2	79.31	2.13151	2.10479	1.85	-0.892	-0.575	0.229	0.825	99
R21_21_Cat08_T298	298	100	0.17	27.57	-0.546	-0.169	-0.445	1780.64	3.41602	1.7	4.95523	2.66923	1.7	4.04868	48.2	79.31	2.13151	2.10479	1.85	-0.892	-0.575	0.229	0.825	99
R21_22_Cat08_T298	298	100	0.17	27.57	-0.541	-0.163	-0.446	1772.98	3.43048	1.7	4.95983	4.23339	2.20501	4.02594	48.2	79.31	2.13151	2.10479	1.85	-0.892	-0.575	0.229	0.825	99
R21_23_Cat08_T298	298	100	0.17	27.57	-0.536	-0.451	-0.788	1825.56	5.35258	1.7	5.69097	2.18054	1.7	2.12621	48.2	79.31	2.13151	2.10479	1.85	-0.892	-0.575	0.229	0.825	99
R21_24_Cat08_T298	298	100	0.17	27.57	-0.54	-0.449	-0.562	1820.43	5.35224	1.7	5.69052	3.26063	1.7	2.70586	48.2	79.31	2.13151	2.10479	1.85	-0.892	-0.575	0.229	0.825	99
R22_11_Cat13_T313	313	1000	0.17	27.57	-0.615	-0.134	-0.561	1708.02	5.3402	1.7	5.69862	5.6889	1.7	5.23867	42.9	78.77	2.11587	2.15011	1.82	-0.833	-0.745	-0.265	0.706	99
R8_01_Cat08_T303	303	100	0.17	27.57	-0.584	-0.191	-0.565	1768.98	8.0613	2.45316	4.76683	3.41843	1.7	4.95688	48.7	79.18	2.14419	2.11169	1.85	-0.897	-0.576	0.237	0.819	99
R8_02_Cat08_T303	303	100	0.17	27.57	-0.586	-0.186	-0.565	1767.01	8.06932	2.43806	4.76639	5.55275	1.7	4.39515	48.7	79.18	2.14419	2.11169	1.85	-0.897	-0.576	0.237	0.819	99
R8_03_Cat08_T303	303	100	0.17	27.57	-0.582	-0.175	-0.566	1768.54	8.03439	2.47156	4.76321	6.45114	1.7	4.13091	48.7	79.18	2.14419	2.11169	1.85	-0.897	-0.576	0.237	0.819	99
R8_04_Cat08_T303	303	100	0.17	27.57	-0.596	-0.217	-0.564	1760.02	8.01799	1.73654	5.40368	6.87842	1.7	4.03638	48.7	79.18	2.14419	2.11169	1.85	-0.897	-0.576	0.237	0.819	99
R8_06_Cat08_T303	303	100	0.17	27.57	-0.577	-0.174	-0.566	1771.65	8.09145	2.40869	4.76946	4.87589	1.7	4.9587	48.7	79.18	2.14419	2.11169	1.85	-0.897	-0.576	0.237	0.819	99
R8_07_Cat08_T303	303	100	0.17	27.57	-0.58	-0.187	-0.567	1769.52	8.02627	1.7361	5.39668	3.4308	1.7	6.50315	48.7	79.18	2.14419	2.11169	1.85	-0.897	-0.576	0.237	0.819	99
R8_08_Cat08_T303	303	100	0.17	27.57	-0.577	-0.175	-0.566	1771.75	8.10012	2.39946	4.77189	4.66229	1.7	4.95897	48.7	79.18	2.14419	2.11169	1.85	-0.897	-0.576	0.237	0.819	99
R8_09_Cat08_T303	303	100	0.17	27.57	-0.58	-0.187	-0.567	1769.38	8.01635	1.73662	5.40215	3.42935	1.7	6.27025	48.7	79.18	2.14419	2.11169	1.85	-0.897	-0.576	0.237	0.819	99
R8_10_Cat08_T303	303	100	0.17	27.57	-0.579	-0.173	-0.566	1770.41	8.05232	2.45564	4.76461	4.02247	1.7	4.95885	48.7	79.18	2.14419	2.11169	1.85	-0.897	-0.576	0.237	0.819	99
R8_11_Cat08_T303	303	100	0.17	27.57	-0.578	-0.184	-0.566	1774.2	8.11212	2.39294	4.77109	5.18226	1.7	5.19841	48.7	79.18	2.14419	2.11169	1.85	-0.897	-0.576	0.237	0.819	99
R8_12_Cat08_T303	303	100	0.17	27.57	-0.574	-0.171	-0.567	1772.76	8.02707	1.73077	5.38437	3.42159	1.7	6.36526	48.7	79.18	2.14419	2.11169	1.85	-0.897	-0.576	0.237	0.819	99
R07_02_Cat05_T300	300	100	0.17	27.57	-0.569	-0.142	-0.171	1770.96	10.9401	1.7	4.07116	3.41837	1.7	4.95491	40.8	77.14	2.15921	2.15291	1.74	-0.83	-0.553	0.027	0.794	99.2
R05_06_Cat06_T333	333	500	0.17	27.57	-0.574	-0.166	-0.312	1780.07	3.37395	1.7	6.23703	2.52858	1.7	3.49011	40.6	75.07	2.14675	2.1771	1.73	-0.872	-0.57	0.037	0.81	99.5
R05_10_Cat07_T313	313	500	0.17	27.57	-0.578	-0.167	-0.346	1770.74	3.36411	1.7	4.9259	2.37511	1.7	3.75486	40.1	75.28	2.14546	2.17619	1.73	-0.875	-0.57	0.038	0.799	99.5
R07_08_Cat05_T300	300	100	0.17	27.57	-0.57	-0.142	-0.171	1770.99	5.71216	1.7	3.1958	3.41862	1.7	4.95502	40.8	77.14	2.15921	2.15291	1.74	-0.83	-0.553	0.027	0.794	99.5
R05_12_Cat06_T303	303	500	0.17	27.57	-0.594	-0.169	-0.437	1750.64	5.26576	1.7	3.29118	3.36433	1.7	4.92506	40.6	75.05	2.14777	2.17693	1.73	-0.872	-0.57	0.037	0.81	99.6
R05_05_Cat06_T333	333	200	0.17	27.57	-0.595	-0.193	-0.306	1765.17	6.84408	1.7	4.04152	2.51879	1.7	3.4961	40.6	75.07	2.14675	2.1771	1.73	-0.872	-0.57	0.037	0.81	99.7
R05_04_Cat06_T333	333	500	0.17	27.57	-0.58	-0.167	-0.31	1776.57	3.36393	1.7	4.92588	2.51788	1.7	3.49313	40.6	75.07	2.14675	2.1771	1.73	-0.872	-0.57	0.037	0.81	99.8
R05_07_Cat06_T333	333	500	0.17	27.57	-0.609	-0.236	-0.301	1731.87	4.13955	1.7	4.58596	2.48562	1.7	3.49557	40.6	75.07	2.14675	2.1771	1.73	-0.872	-0.57	0.037	0.81	99.8
R05_01_Cat06_T333	333	1000	0.17	27.57	-0.582	-0.168	-0.303	1748.39	3.42884	1.7	4.95215	2.70006	1.7	4.51157	40.6	75.07	2.14675	2.1771	1.73	-0.872	-0.57	0.037	0.81	99.9
R05_01_Cat07_T333	333	1000	0.17	27.57	-0.582	-0.168	-0.303	1748.39	3.42884	1.7	4.95215	2.70006	1.7	4.51157	40.1	75.28	2.14546	2.17619	1.73	-0.875	-0.57	0.038	0.799	99.9
R05_02_Cat06_T333	333	500	0.17	27.57	-0.584	-0.148	-0.302	1745.29	6.14775	1.7	4.66175	2.70066	1.7	4.5096	40.6	75.07	2.14675	2.1771	1.73	-0.872	-0.57	0.037	0.81	99.9
R05_03_Cat06_T333	333	500	0.17	27.57	-0.573	-0.15	-0.306	1755.9	4.87789	1.7	4.95697	2.70026	1.7	4.51384	40.6	75.07	2.14675	2.1771	1.73	-0.872	-0.57	0.037	0.81	99.9
R05_11_Cat07_T313	313	500	0.17	27.57	-0.579	-0.166	-0.367	1746.95	3.42162	1.7	4.95562	2.71296	1.7	4.50342	40.1	75.28	2.14546	2.17619	1.73	-0.875	-0.57	0.038	0.799	99.9
R05_14_Cat06_T333	333	500	0.17	27.57	-0.593	-0.172	-0.422	1758.83	6.45144	1.7	5.10201	3.36452	1.7	4.92604	40.6	75.07	2.14675	2.1771	1.73	-0.872	-0.57	0.037	0.81	99.9
R05_15_Cat06_T333	333	500	0.17	27.57	-0.619	-0.165	-0.424	1694.43	6.74764	2.02059	4.6137	3.42367	1.7	4.95519	40.6	75.07	2.14675	2.1771	1.73	-0.872	-0.57	0.037	0.81	99.9
R05_16_Cat07_T333	333	100	0.17	27.57	-0.618	-0.157	-0.428	1692.56	4.23415	2.54598	6.70757	3.43115	1.7	4.95808	40.1	75.28	2.14546	2.17619	1.73	-0.875	-0.57	0.038	0.799	99.9
R07_01_Cat05_T300	300	100	0.17	27.57	-0.569	-0.142	-0.171	1771.05	9.46618	1.7	5.80759	3.41841	1.7	4.95486	40.8	77.14	2.15921	2.15291	1.74	-0.83	-0.553	0.027	0.794	99.9
R07_03_Cat05_T300	300	100	0.17	27.57	-0.569	-0.142	-0.171	1771.02	11.8796	1.7	4.85787	3.41844	1.7	4.95495	40.8	77.14	2.15921	2.15291	1.74	-0.83	-0.553	0.027	0.794	99.9
R22_08_Cat13_T313	313	1000	0.17	27.57	-0.627	-0.128	-0.791	1708.32	6.56279	1.7	5.87216	2.1833	1.7	2.13639	42.9	78.77	2.11587	2.15011	1.82	-0.833	-0.745	-0.265	0.706	99.9

## Sheet: SMILES
Reactions_Number	S_SMILES	C_SMILES	Temperature	S_C	H_logP	H_TPSA	Ee
R01_01_Cat01_T301	CC(C1=CC=CC=C1)=O	N[C@@H](C1=CC=CC=C1)[C@@H](N([Ru]Cl)S(C2=CC=C(C)C=C2)(=O)=O)C3=CC=CC=C3.CC4=CC(C)=CC(C)=C4	301	200	0.17	27.57	98
R01_02_Cat01_T301	CC(C1=CC(Cl)=CC=C1)=O	N[C@@H](C1=CC=CC=C1)[C@@H](N([Ru]Cl)S(C2=CC=C(C)C=C2)(=O)=O)C3=CC=CC=C3.CC4=CC(C)=CC(C)=C4	301	200	0.17	27.57	97
R01_03_Cat01_T301	CC(C1=CC=C(Cl)C=C1)=O	N[C@@H](C1=CC=CC=C1)[C@@H](N([Ru]Cl)S(C2=CC=C(C)C=C2)(=O)=O)C3=CC=CC=C3.CC4=CC(C)=CC(C)=C4	301	200	0.17	27.57	95
R01_04_Cat01_T301	CC(C1=CC(OC)=CC=C1)=O	N[C@@H](C1=CC=CC=C1)[C@@H](N([Ru]Cl)S(C2=CC=C(C)C=C2)(=O)=O)C3=CC=CC=C3.CC4=CC(C)=CC(C)=C4	301	200	0.17	27.57	98
R01_05_Cat01_T301	CC(C1=CC=C(OC)C=C1)=O	N[C@@H](C1=CC=CC=C1)[C@@H](N([Ru]Cl)S(C2=CC=C(C)C=C2)(=O)=O)C3=CC=CC=C3.CC4=CC(C)=CC(C)=C4	301	200	0.17	27.57	97
R01_06_Cat01_T301	O=C(CC)C1=CC=CC=C1	N[C@@H](C1=CC=CC=C1)[C@@H](N([Ru]Cl)S(C2=CC=C(C)C=C2)(=O)=O)C3=CC=CC=C3.CC4=CC(C)=CC(C)=C4	301	200	0.17	27.57	97
R01_07_Cat01_T301	O=C(CCCC(OCC)=O)C1=CC=CC=C1	N[C@@H](C1=CC=CC=C1)[C@@H](N([Ru]Cl)S(C2=CC=C(C)C=C2)(=O)=O)C3=CC=CC=C3.CC4=CC(C)=CC(C)=C4	301	200	0.17	27.57	95
R01_08_Cat01_T301	CC(C1=CC(C=CC=C2)=C2C=C1)=O	N[C@@H](C1=CC=CC=C1)[C@@H](N([Ru]Cl)S(C2=CC=C(C)C=C2)(=O)=O)C3=CC=CC=C3.CC4=CC(C)=CC(C)=C4	301	200	0.17	27.57	96
R01_09_Cat01_T301	O=C1CCC2=CC=CC=C21	N[C@@H](C1=CC=CC=C1)[C@@H](N([Ru]Cl)S(C2=CC=C(C)C=C2)(=O)=O)C3=CC=CC=C3.CC4=CC(C)=CC(C)=C4	301	200	0.17	27.57	99
R01_10_Cat01_T301	O=C1CCCC2=CC=CC=C21	N[C@@H](C1=CC=CC=C1)[C@@H](N([Ru]Cl)S(C2=CC=C(C)C=C2)(=O)=O)C3=CC=CC=C3.CC4=CC(C)=CC(C)=C4	301	200	0.17	27.57	99
R01_11_Cat01_T301	CC(C1=CC=CS1)=O	N[C@@H](C1=CC=CC=C1)[C@@H](N([Ru]Cl)S(C2=CC=C(C)C=C2)(=O)=O)C3=CC=CC=C3.CC4=CC(C)=CC(C)=C4	301	200	0.17	27.57	98
R01_12_Cat01_T301	O=C1CC(C)(C)OC2=CC=CC=C21	N[C@@H](C1=CC=CC=C1)[C@@H](N([Ru]Cl)S(C2=CC=C(C)C=C2)(=O)=O)C3=CC=CC=C3.CC4=CC(C)=CC(C)=C4	301	200	0.17	27.57	97
R01_01_Cat01_T333	CC(C1=CC=CC=C1)=O	N[C@@H](C1=CC=CC=C1)[C@@H](N([Ru]Cl)S(C2=CC=C(C)C=C2)(=O)=O)C3=CC=CC=C3.CC4=CC(C)=CC(C)=C4	333	200	0.17	27.57	96
R01_10_Cat01_T333	O=C1CCCC2=CC=CC=C21	N[C@@H](C1=CC=CC=C1)[C@@H](N([Ru]Cl)S(C2=CC=C(C)C=C2)(=O)=O)C3=CC=CC=C3.CC4=CC(C)=CC(C)=C4	333	200	0.17	27.57	98
R02_01_Cat02_T313	CC(C1=CC=CC=C1)=O	Cl[Ru]N([C@H]([C@H](C1=CC=CC=C1)N([H])CC(C=CC=C2)=C2C3=CC=CC=C3)C4=CC=CC=C4)S(C5=CC=C(C)C=C5)(=O)=O	313	200	0.17	27.57	95
R02_02_Cat02_T301	CC(C1=CC(Cl)=CC=C1)=O	Cl[Ru]N([C@H]([C@H](C1=CC=CC=C1)N([H])CC(C=CC=C2)=C2C3=CC=CC=C3)C4=CC=CC=C4)S(C5=CC=C(C)C=C5)(=O)=O	301	200	0.17	27.57	88
R02_04_Cat02_T301	O=C(CCl)C1=CC=CC=C1	Cl[Ru]N([C@H]([C@H](C1=CC=CC=C1)N([H])CC(C=CC=C2)=C2C3=CC=CC=C3)C4=CC=CC=C4)S(C5=CC=C(C)C=C5)(=O)=O	301	200	0.17	27.57	92
R02_05_Cat02_T301	O=C(COC1=CC=CC=C1)C2=CC=CC=C2	Cl[Ru]N([C@H]([C@H](C1=CC=CC=C1)N([H])CC(C=CC=C2)=C2C3=CC=CC=C3)C4=CC=CC=C4)S(C5=CC=C(C)C=C5)(=O)=O	301	200	0.17	27.57	93
R02_03_Cat02_T313	CC(C1=CC=C(Cl)C=C1)=O	Cl[Ru]N([C@H]([C@H](C1=CC=CC=C1)N([H])CC(C=CC=C2)=C2C3=CC=CC=C3)C4=CC=CC=C4)S(C5=CC=C(C)C=C5)(=O)=O	313	200	0.17	27.57	89
R02_02_Cat03_T301	CC(C1=CC(Cl)=CC=C1)=O	Cl[Ru]N([C@H]1CCCC[C@@H]1N([H])CCCC2=CC=CC=C2)S(C3=CC=C(C)C=C3)(=O)=O	301	200	0.17	27.57	86
R02_03_Cat03_T301	CC(C1=CC=C(Cl)C=C1)=O	Cl[Ru]N([C@H]1CCCC[C@@H]1N([H])CCCC2=CC=CC=C2)S(C3=CC=C(C)C=C3)(=O)=O	301	200	0.17	27.57	86
R02_04_Cat03_T301	O=C(CCl)C1=CC=CC=C1	Cl[Ru]N([C@H]1CCCC[C@@H]1N([H])CCCC2=CC=CC=C2)S(C3=CC=C(C)C=C3)(=O)=O	301	200	0.17	27.57	83
R02_05_Cat03_T301	O=C(COC1=CC=CC=C1)C2=CC=CC=C2	Cl[Ru]N([C@H]1CCCC[C@@H]1N([H])CCCC2=CC=CC=C2)S(C3=CC=C(C)C=C3)(=O)=O	301	200	0.17	27.57	85
R02_06_Cat03_T301	CC(C1=CC=CC(C(F)(F)F)=C1)=O	Cl[Ru]N([C@H]1CCCC[C@@H]1N([H])CCCC2=CC=CC=C2)S(C3=CC=C(C)C=C3)(=O)=O	301	200	0.17	27.57	88
R02_07_Cat03_T301	CC(C1=CC(OC)=CC=C1)=O	Cl[Ru]N([C@H]1CCCC[C@@H]1N([H])CCCC2=CC=CC=C2)S(C3=CC=C(C)C=C3)(=O)=O	301	200	0.17	27.57	83
R03_01_Cat04_T303	CC(C(Cl)(Cl)C(OCC1=CC=CC=C1)=O)=O	N[C@@H](C1=CC=CC=C1)[C@@H](N([Ru]Cl)S(C2=CC=C(C)C=C2)(=O)=O)C3=CC=CC=C3.CC(C)C4=CC=C(C)C=C4	303	100	0.17	27.57	99
R03_02_Cat04_T303	O=C(C(Cl)(Cl)C(OCC1=CC=CC=C1)=O)CCCC	N[C@@H](C1=CC=CC=C1)[C@@H](N([Ru]Cl)S(C2=CC=C(C)C=C2)(=O)=O)C3=CC=CC=C3.CC(C)C4=CC=C(C)C=C4	303	100	0.17	27.57	99
R03_03_Cat04_T303	O=C(C(Cl)(Cl)C(OCC1=CC=CC=C1)=O)CC(C)C	N[C@@H](C1=CC=CC=C1)[C@@H](N([Ru]Cl)S(C2=CC=C(C)C=C2)(=O)=O)C3=CC=CC=C3.CC(C)C4=CC=C(C)C=C4	303	100	0.17	27.57	98
R03_04_Cat04_T303	O=C(C(Cl)(Cl)C(OCC1=CC=CC=C1)=O)CCCCCCCCCCCCCC	N[C@@H](C1=CC=CC=C1)[C@@H](N([Ru]Cl)S(C2=CC=C(C)C=C2)(=O)=O)C3=CC=CC=C3.CC(C)C4=CC=C(C)C=C4	303	100	0.17	27.57	99
R03_05_Cat04_T303	CC(C(Cl)(Cl)C(OC(C)(C)C)=O)=O	N[C@@H](C1=CC=CC=C1)[C@@H](N([Ru]Cl)S(C2=CC=C(C)C=C2)(=O)=O)C3=CC=CC=C3.CC(C)C4=CC=C(C)C=C4	303	100	0.17	27.57	99
R03_06_Cat04_T303	CC(C(Cl)(Cl)C(OCC=C)=O)=O	N[C@@H](C1=CC=CC=C1)[C@@H](N([Ru]Cl)S(C2=CC=C(C)C=C2)(=O)=O)C3=CC=CC=C3.CC(C)C4=CC=C(C)C=C4	303	100	0.17	27.57	99
R03_07_Cat04_T303	O=C(C(Cl)(Cl)C(OCC=C)=O)CCC1=CC=CC=C1	N[C@@H](C1=CC=CC=C1)[C@@H](N([Ru]Cl)S(C2=CC=C(C)C=C2)(=O)=O)C3=CC=CC=C3.CC(C)C4=CC=C(C)C=C4	303	100	0.17	27.57	99
R03_08_Cat04_T303	O=C(C(Cl)(Cl)C(OCC)=O)CCC	N[C@@H](C1=CC=CC=C1)[C@@H](N([Ru]Cl)S(C2=CC=C(C)C=C2)(=O)=O)C3=CC=CC=C3.CC(C)C4=CC=C(C)C=C4	303	100	0.17	27.57	99
R03_09_Cat04_T303	O=C(C(Cl)(Cl)C(OC)=O)CCCC#C	N[C@@H](C1=CC=CC=C1)[C@@H](N([Ru]Cl)S(C2=CC=C(C)C=C2)(=O)=O)C3=CC=CC=C3.CC(C)C4=CC=C(C)C=C4	303	100	0.17	27.57	98.5
R03_10_Cat04_T303	O=C(C(Cl)(Cl)C(OC)=O)CCC1=C(Cl)C(OC)=C(OC)C(OC)=C1Cl	N[C@@H](C1=CC=CC=C1)[C@@H](N([Ru]Cl)S(C2=CC=C(C)C=C2)(=O)=O)C3=CC=CC=C3.CC(C)C4=CC=C(C)C=C4	303	100	0.17	27.57	98
R03_11_Cat04_T303	O=C(C(Cl)(Cl)C(OCC)=O)C1=CC=CC=C1	N[C@@H](C1=CC=CC=C1)[C@@H](N([Ru]Cl)S(C2=CC=C(C)C=C2)(=O)=O)C3=CC=CC=C3.CC(C)C4=CC=C(C)C=C4	303	100	0.17	27.57	70
R03_12_Cat04_T303	O=C(C(Cl)(Cl)C(OCC)=O)C1=CC=C(OC)C=C1	N[C@@H](C1=CC=CC=C1)[C@@H](N([Ru]Cl)S(C2=CC=C(C)C=C2)(=O)=O)C3=CC=CC=C3.CC(C)C4=CC=C(C)C=C4	303	100	0.17	27.57	71
R03_13_Cat04_T303	O=C(C(F)(F)C(OCC)=O)C1=CC=C(CCCCC)C=C1	N[C@@H](C1=CC=CC=C1)[C@@H](N([Ru]Cl)S(C2=CC=C(C)C=C2)(=O)=O)C3=CC=CC=C3.CC(C)C4=CC=C(C)C=C4	303	100	0.17	27.57	98
R03_14_Cat04_T303	O=C(C(F)(F)C(OCC)=O)CCC1=CC=CC=C1	N[C@@H](C1=CC=CC=C1)[C@@H](N([Ru]Cl)S(C2=CC=C(C)C=C2)(=O)=O)C3=CC=CC=C3.CC(C)C4=CC=C(C)C=C4	303	100	0.17	27.57	98
R03_15_Cat04_T303	CC(C(Cl)(Cl)C(NC1=CC=CC=C1)=O)=O	N[C@@H](C1=CC=CC=C1)[C@@H](N([Ru]Cl)S(C2=CC=C(C)C=C2)(=O)=O)C3=CC=CC=C3.CC(C)C4=CC=C(C)C=C4	303	100	0.17	27.57	98.5
R03_16_Cat04_T303	CC(C(Cl)(Cl)C(N(CC=C)CC1=CC=CC=C1)=O)=O	N[C@@H](C1=CC=CC=C1)[C@@H](N([Ru]Cl)S(C2=CC=C(C)C=C2)(=O)=O)C3=CC=CC=C3.CC(C)C4=CC=C(C)C=C4	303	100	0.17	27.57	98
R04_01_Cat05_T301	CC(C1=CC=CC=C1)=O	Cl[Ru]N([C@H]([C@H](C1=CC=CC=C1)N([H])CCCC2=CC=CC=C2)C3=CC=CC=C3)S(C4=CC=C(C)C=C4)(=O)=O	301	200	0.17	27.57	96
R04_01_Cat05_T313	CC(C1=CC=CC=C1)=O	Cl[Ru]N([C@H]([C@H](C1=CC=CC=C1)N([H])CCCC2=CC=CC=C2)C3=CC=CC=C3)S(C4=CC=C(C)C=C4)(=O)=O	313	200	0.17	27.57	96
R04_01_Cat05_T353	CC(C1=CC=CC=C1)=O	Cl[Ru]N([C@H]([C@H](C1=CC=CC=C1)N([H])CCCC2=CC=CC=C2)C3=CC=CC=C3)S(C4=CC=C(C)C=C4)(=O)=O	353	200	0.17	27.57	94
R04_02_Cat05_T287	CC(C1CCCCC1)=O	Cl[Ru]N([C@H]([C@H](C1=CC=CC=C1)N([H])CCCC2=CC=CC=C2)C3=CC=CC=C3)S(C4=CC=C(C)C=C4)(=O)=O	287	200	0.17	27.57	72
R04_02_Cat05_T301	CC(C1CCCCC1)=O	Cl[Ru]N([C@H]([C@H](C1=CC=CC=C1)N([H])CCCC2=CC=CC=C2)C3=CC=CC=C3)S(C4=CC=C(C)C=C4)(=O)=O	301	200	0.17	27.57	69
R04_03_Cat05_T313	O=C(C1=CC=CC=C1)C2CCCCC2	Cl[Ru]N([C@H]([C@H](C1=CC=CC=C1)N([H])CCCC2=CC=CC=C2)C3=CC=CC=C3)S(C4=CC=C(C)C=C4)(=O)=O	313	200	0.17	27.57	94
R04_04_Cat05_T301	O=C(CC)C1=CC=CC=C1	Cl[Ru]N([C@H]([C@H](C1=CC=CC=C1)N([H])CCCC2=CC=CC=C2)C3=CC=CC=C3)S(C4=CC=C(C)C=C4)(=O)=O	301	200	0.17	27.57	95
R04_04_Cat05_T313	O=C(CC)C1=CC=CC=C1	Cl[Ru]N([C@H]([C@H](C1=CC=CC=C1)N([H])CCCC2=CC=CC=C2)C3=CC=CC=C3)S(C4=CC=C(C)C=C4)(=O)=O	313	200	0.17	27.57	95
R04_05_Cat05_T313	O=C(C(C)C)C1=CC=CC=C1	Cl[Ru]N([C@H]([C@H](C1=CC=CC=C1)N([H])CCCC2=CC=CC=C2)C3=CC=CC=C3)S(C4=CC=C(C)C=C4)(=O)=O	313	200	0.17	27.57	95
R04_06_Cat05_T313	O=C(C(C)(C)C)C1=CC=CC=C1	Cl[Ru]N([C@H]([C@H](C1=CC=CC=C1)N([H])CCCC2=CC=CC=C2)C3=CC=CC=C3)S(C4=CC=C(C)C=C4)(=O)=O	313	200	0.17	27.57	77
R04_07_Cat05_T313	O=C(C1CC1)C2=CC=CC=C2	Cl[Ru]N([C@H]([C@H](C1=CC=CC=C1)N([H])CCCC2=CC=CC=C2)C3=CC=CC=C3)S(C4=CC=C(C)C=C4)(=O)=O	313	200	0.17	27.57	78
R04_08_Cat05_T313	O=C(C1CCCC1)C2=CC=CC=C2	Cl[Ru]N([C@H]([C@H](C1=CC=CC=C1)N([H])CCCC2=CC=CC=C2)C3=CC=CC=C3)S(C4=CC=C(C)C=C4)(=O)=O	313	200	0.17	27.57	78
R05_01_Cat06_T333	O=C1C(Cl)CCC2=CC=CC=C21	Cl[Ru]N([C@H]([C@H](C1=CC=CC=C1)N([H])CCOCC2=CC=C(C)C=C2)C3=CC=CC=C3)S(C4=CC=C(C)C=C4)(=O)=O	333	1000	0.17	27.57	99.9
R05_02_Cat06_T333	O=C1C(Cl)CCC2=CC=C(OC)C=C21	Cl[Ru]N([C@H]([C@H](C1=CC=CC=C1)N([H])CCOCC2=CC=C(C)C=C2)C3=CC=CC=C3)S(C4=CC=C(C)C=C4)(=O)=O	333	500	0.17	27.57	99.9
R05_03_Cat06_T333	O=C1C(Cl)CCC2=CC=C(Br)C=C21	Cl[Ru]N([C@H]([C@H](C1=CC=CC=C1)N([H])CCOCC2=CC=C(C)C=C2)C3=CC=CC=C3)S(C4=CC=C(C)C=C4)(=O)=O	333	500	0.17	27.57	99.9
R05_04_Cat06_T333	O=C1C(Cl)CC2=CC=CC=C21	Cl[Ru]N([C@H]([C@H](C1=CC=CC=C1)N([H])CCOCC2=CC=C(C)C=C2)C3=CC=CC=C3)S(C4=CC=C(C)C=C4)(=O)=O	333	500	0.17	27.57	99.8
R05_05_Cat06_T333	O=C1C(Cl)CC2=CC(OC)=CC=C21	Cl[Ru]N([C@H]([C@H](C1=CC=CC=C1)N([H])CCOCC2=CC=C(C)C=C2)C3=CC=CC=C3)S(C4=CC=C(C)C=C4)(=O)=O	333	200	0.17	27.57	99.7
R05_06_Cat06_T333	O=C1C(Cl)CC2=CC(Cl)=CC=C21	Cl[Ru]N([C@H]([C@H](C1=CC=CC=C1)N([H])CCOCC2=CC=C(C)C=C2)C3=CC=CC=C3)S(C4=CC=C(C)C=C4)(=O)=O	333	500	0.17	27.57	99.5
R05_07_Cat06_T333	O=C1C(Cl)CC2=CC=CC(O)=C21	Cl[Ru]N([C@H]([C@H](C1=CC=CC=C1)N([H])CCOCC2=CC=C(C)C=C2)C3=CC=CC=C3)S(C4=CC=C(C)C=C4)(=O)=O	333	500	0.17	27.57	99.8
R05_12_Cat06_T303	O=C1C(C(OC)=O)CC2=CC=CC=C21	Cl[Ru]N([C@H]([C@H](C1=CC=CC=C1)N([H])CCOCC2=CC=C(C)C=C2)C3=CC=CC=C3)S(C4=CC=C(C)C=C4)(=O)=O	303	500	0.17	27.57	99.6
R05_14_Cat06_T333	O=C1C(C(NC(C)(C)C)=O)CC2=CC=CC=C21	Cl[Ru]N([C@H]([C@H](C1=CC=CC=C1)N([H])CCOCC2=CC=C(C)C=C2)C3=CC=CC=C3)S(C4=CC=C(C)C=C4)(=O)=O	333	500	0.17	27.57	99.9
R05_15_Cat06_T333	O=C1C(C(NC(C)(C)C)=O)CCC2=CC=CC=C21	Cl[Ru]N([C@H]([C@H](C1=CC=CC=C1)N([H])CCOCC2=CC=C(C)C=C2)C3=CC=CC=C3)S(C4=CC=C(C)C=C4)(=O)=O	333	500	0.17	27.57	99.9
R05_08_Cat07_T333	O=C1C(Cl)CCCC2=CC=CC=C21	Cl[Ru]N([C@H]([C@H](C1=CC=CC=C1)N([H])CCOCC2=CC=C(C)C=C2)C3=CC=CC=C3)S(C)(=O)=O	333	100	0.17	27.57	97
R05_10_Cat07_T313	O=C1C(Br)CC2=CC=CC=C21	Cl[Ru]N([C@H]([C@H](C1=CC=CC=C1)N([H])CCOCC2=CC=C(C)C=C2)C3=CC=CC=C3)S(C)(=O)=O	313	500	0.17	27.57	99.5
R05_11_Cat07_T313	O=C1C(Br)CCC2=CC=CC=C21	Cl[Ru]N([C@H]([C@H](C1=CC=CC=C1)N([H])CCOCC2=CC=C(C)C=C2)C3=CC=CC=C3)S(C)(=O)=O	313	500	0.17	27.57	99.9
R05_13_Cat07_T333	O=C1C(C(OC)=O)CCCC2=CC=CC=C21	Cl[Ru]N([C@H]([C@H](C1=CC=CC=C1)N([H])CCOCC2=CC=C(C)C=C2)C3=CC=CC=C3)S(C)(=O)=O	333	200	0.17	27.57	98.9
R05_16_Cat07_T333	O=C1C(C(NC(C)(C)C)=O)CCCC2=CC=CC=C21	Cl[Ru]N([C@H]([C@H](C1=CC=CC=C1)N([H])CCOCC2=CC=C(C)C=C2)C3=CC=CC=C3)S(C)(=O)=O	333	100	0.17	27.57	99.9
R05_01_Cat07_T333	O=C1C(Cl)CCC2=CC=CC=C21	Cl[Ru]N([C@H]([C@H](C1=CC=CC=C1)N([H])CCOCC2=CC=C(C)C=C2)C3=CC=CC=C3)S(C)(=O)=O	333	1000	0.17	27.57	99.9
R06_01_Cat06_T333	O=C(C1=CC=CC=C1)C2=C(C)C=CC=C2	Cl[Ru]N([C@H]([C@H](C1=CC=CC=C1)N([H])CCOCC2=CC=C(C)C=C2)C3=CC=CC=C3)S(C4=CC=C(C)C=C4)(=O)=O	333	100	0.17	27.57	98
R06_02_Cat06_T313	O=C(C1=CC=CC=C1)C2=C(Cl)C=CC=C2	Cl[Ru]N([C@H]([C@H](C1=CC=CC=C1)N([H])CCOCC2=CC=C(C)C=C2)C3=CC=CC=C3)S(C4=CC=C(C)C=C4)(=O)=O	313	100	0.17	27.57	98
R06_03_Cat06_T333	O=C(C1=CC=CC=C1)C2=C(Br)C=CC=C2	Cl[Ru]N([C@H]([C@H](C1=CC=CC=C1)N([H])CCOCC2=CC=C(C)C=C2)C3=CC=CC=C3)S(C4=CC=C(C)C=C4)(=O)=O	333	100	0.17	27.57	99
R06_04_Cat06_T333	O=C(C1=CC=CC=C1)C2=C(C(F)(F)F)C=CC=C2	Cl[Ru]N([C@H]([C@H](C1=CC=CC=C1)N([H])CCOCC2=CC=C(C)C=C2)C3=CC=CC=C3)S(C4=CC=C(C)C=C4)(=O)=O	333	100	0.17	27.57	99
R06_05_Cat06_T333	O=C(C1=CC=CC=C1)C2=C(C)C=C(C)C=C2	Cl[Ru]N([C@H]([C@H](C1=CC=CC=C1)N([H])CCOCC2=CC=C(C)C=C2)C3=CC=CC=C3)S(C4=CC=C(C)C=C4)(=O)=O	333	100	0.17	27.57	97
R06_06_Cat06_T333	O=C(C1=CC=CC=C1)C2=C(C)C=C(C(C)C)C=C2	Cl[Ru]N([C@H]([C@H](C1=CC=CC=C1)N([H])CCOCC2=CC=C(C)C=C2)C3=CC=CC=C3)S(C4=CC=C(C)C=C4)(=O)=O	333	100	0.17	27.57	98
R06_07_Cat06_T303	O=C(C1=CC=CC=C1)C2=C(Cl)C=C(Cl)C=C2	Cl[Ru]N([C@H]([C@H](C1=CC=CC=C1)N([H])CCOCC2=CC=C(C)C=C2)C3=CC=CC=C3)S(C4=CC=C(C)C=C4)(=O)=O	303	100	0.17	27.57	99
R06_08_Cat06_T313	O=C(C1=CC=CC=C1)C2=C(Cl)C=CC([N+]([O-])=O)=C2	Cl[Ru]N([C@H]([C@H](C1=CC=CC=C1)N([H])CCOCC2=CC=C(C)C=C2)C3=CC=CC=C3)S(C4=CC=C(C)C=C4)(=O)=O	313	100	0.17	27.57	99
R06_09_Cat06_T283	O=C(C1=CC=CC=C1)C2=C(F)C=CC(F)=C2	Cl[Ru]N([C@H]([C@H](C1=CC=CC=C1)N([H])CCOCC2=CC=C(C)C=C2)C3=CC=CC=C3)S(C4=CC=C(C)C=C4)(=O)=O	283	100	0.17	27.57	91
R06_10_Cat06_T303	O=C(C1=CC=CC=C1)C2=C(F)C(C(F)(F)F)=CC=C2	Cl[Ru]N([C@H]([C@H](C1=CC=CC=C1)N([H])CCOCC2=CC=C(C)C=C2)C3=CC=CC=C3)S(C4=CC=C(C)C=C4)(=O)=O	303	100	0.17	27.57	90
R06_11_Cat06_T333	O=C(C1=CC=CC=C1)C2=C(F)C(F)=C(F)C(F)=C2F	Cl[Ru]N([C@H]([C@H](C1=CC=CC=C1)N([H])CCOCC2=CC=C(C)C=C2)C3=CC=CC=C3)S(C4=CC=C(C)C=C4)(=O)=O	333	100	0.17	27.57	99
R06_12_Cat06_T303	O=C(C1=CC=C(Cl)C=C1)C2=C(Cl)C=CC=C2	Cl[Ru]N([C@H]([C@H](C1=CC=CC=C1)N([H])CCOCC2=CC=C(C)C=C2)C3=CC=CC=C3)S(C4=CC=C(C)C=C4)(=O)=O	303	100	0.17	27.57	97
R06_13_Cat06_T313	O=C(C1=CC=C(F)C=C1)C2=C(Cl)C=CC=C2	Cl[Ru]N([C@H]([C@H](C1=CC=CC=C1)N([H])CCOCC2=CC=C(C)C=C2)C3=CC=CC=C3)S(C4=CC=C(C)C=C4)(=O)=O	313	100	0.17	27.57	97
R06_15_Cat06_T303	O=C(C1=CC=CC=C1)C2=CC(Cl)=C(Cl)C=C2	Cl[Ru]N([C@H]([C@H](C1=CC=CC=C1)N([H])CCOCC2=CC=C(C)C=C2)C3=CC=CC=C3)S(C4=CC=C(C)C=C4)(=O)=O	303	100	0.17	27.57	76
R06_16_Cat06_T303	O=C(C1=CC=CC=C1)C2=CC(F)=C(F)C=C2	Cl[Ru]N([C@H]([C@H](C1=CC=CC=C1)N([H])CCOCC2=CC=C(C)C=C2)C3=CC=CC=C3)S(C4=CC=C(C)C=C4)(=O)=O	303	100	0.17	27.57	77
R06_17_Cat06_T303	O=C(C1=CC=CC=C1)C2=CC=C([N+]([O-])=O)C=C2	Cl[Ru]N([C@H]([C@H](C1=CC=CC=C1)N([H])CCOCC2=CC=C(C)C=C2)C3=CC=CC=C3)S(C4=CC=C(C)C=C4)(=O)=O	303	100	0.17	27.57	76
R06_18_Cat06_T303	O=C(C1=CC=CC=C1)C2=CC([N+]([O-])=O)=C(Cl)C=C2	Cl[Ru]N([C@H]([C@H](C1=CC=CC=C1)N([H])CCOCC2=CC=C(C)C=C2)C3=CC=CC=C3)S(C4=CC=C(C)C=C4)(=O)=O	303	100	0.17	27.57	93
R06_19_Cat06_T283	O=C(C1=CC=CC=C1)C2=CC(F)=C(F)C(F)=C2	Cl[Ru]N([C@H]([C@H](C1=CC=CC=C1)N([H])CCOCC2=CC=C(C)C=C2)C3=CC=CC=C3)S(C4=CC=C(C)C=C4)(=O)=O	283	100	0.17	27.57	95
R06_20_Cat06_T303	O=C(C1=CC=CC=C1)C2=CC([N+]([O-])=O)=CC([N+]([O-])=O)=C2	Cl[Ru]N([C@H]([C@H](C1=CC=CC=C1)N([H])CCOCC2=CC=C(C)C=C2)C3=CC=CC=C3)S(C4=CC=C(C)C=C4)(=O)=O	303	100	0.17	27.57	99
R06_24_Cat06_T303	O=C(C1=CC=C(OC)C=C1)C2=CC=C([N+]([O-])=O)C=C2	Cl[Ru]N([C@H]([C@H](C1=CC=CC=C1)N([H])CCOCC2=CC=C(C)C=C2)C3=CC=CC=C3)S(C4=CC=C(C)C=C4)(=O)=O	303	100	0.17	27.57	79
R06_25_Cat06_T303	O=C(C1=CC=C(OC)C=C1)C2=CC([N+]([O-])=O)=CC([N+]([O-])=O)=C2	Cl[Ru]N([C@H]([C@H](C1=CC=CC=C1)N([H])CCOCC2=CC=C(C)C=C2)C3=CC=CC=C3)S(C4=CC=C(C)C=C4)(=O)=O	303	100	0.17	27.57	99
R07_01_Cat05_T300	O=C1C(N2C=C(C3=CC=CC=C3)N=N2)CCC4=CC=CC=C41	Cl[Ru]N([C@H]([C@H](C1=CC=CC=C1)N([H])CCCC2=CC=CC=C2)C3=CC=CC=C3)S(C4=CC=C(C)C=C4)(=O)=O	300	100	0.17	27.57	99.9
R07_02_Cat05_T300	O=C1C(N2C=C(C3=CC=C(C)C=C3)N=N2)CCC4=CC=CC=C41	Cl[Ru]N([C@H]([C@H](C1=CC=CC=C1)N([H])CCCC2=CC=CC=C2)C3=CC=CC=C3)S(C4=CC=C(C)C=C4)(=O)=O	300	100	0.17	27.57	99.2
R07_03_Cat05_T300	O=C1C(N2C=C(C3=CC=C(OC)C=C3)N=N2)CCC4=CC=CC=C41	Cl[Ru]N([C@H]([C@H](C1=CC=CC=C1)N([H])CCCC2=CC=CC=C2)C3=CC=CC=C3)S(C4=CC=C(C)C=C4)(=O)=O	300	100	0.17	27.57	99.9
R07_04_Cat05_T300	O=C1C(N2C=C(C3=CC=C(CCCCCC)C=C3)N=N2)CCC4=CC=CC=C41	Cl[Ru]N([C@H]([C@H](C1=CC=CC=C1)N([H])CCCC2=CC=CC=C2)C3=CC=CC=C3)S(C4=CC=C(C)C=C4)(=O)=O	300	100	0.17	27.57	94.3
R07_05_Cat05_T300	O=C1C(N2C=C(C3CC3)N=N2)CCC4=CC=CC=C41	Cl[Ru]N([C@H]([C@H](C1=CC=CC=C1)N([H])CCCC2=CC=CC=C2)C3=CC=CC=C3)S(C4=CC=C(C)C=C4)(=O)=O	300	100	0.17	27.57	97.7
R07_06_Cat05_T300	O=C1C(N2C=C(C3CCCCC3)N=N2)CCC4=CC=CC=C41	Cl[Ru]N([C@H]([C@H](C1=CC=CC=C1)N([H])CCCC2=CC=CC=C2)C3=CC=CC=C3)S(C4=CC=C(C)C=C4)(=O)=O	300	100	0.17	27.57	87.6
R07_07_Cat05_T300	O=C1C(N2C(C=CC=C3)=C3N=N2)CCC4=CC=CC=C41	Cl[Ru]N([C@H]([C@H](C1=CC=CC=C1)N([H])CCCC2=CC=CC=C2)C3=CC=CC=C3)S(C4=CC=C(C)C=C4)(=O)=O	300	100	0.17	27.57	88.3
R07_08_Cat05_T300	O=C1C(N2C=CN=N2)CCC3=CC=CC=C31	Cl[Ru]N([C@H]([C@H](C1=CC=CC=C1)N([H])CCCC2=CC=CC=C2)C3=CC=CC=C3)S(C4=CC=C(C)C=C4)(=O)=O	300	100	0.17	27.57	99.5
R07_09_Cat05_T300	O=C1C(N2C=C(C3=CC=CC=C3)N=N2)CCC4=CC=CC=C41	Cl[Ru]N([C@H]([C@H](C1=CC=CC=C1)N([H])CCCC2=CC=CC=C2)C3=CC=CC=C3)S(C4=CC=C(C)C=C4)(=O)=O	300	100	0.17	27.57	91.8
R07_10_Cat05_T300	O=C1C(N2C=C(C3=CC=CC=C3)N=N2)CCCC1	Cl[Ru]N([C@H]([C@H](C1=CC=CC=C1)N([H])CCCC2=CC=CC=C2)C3=CC=CC=C3)S(C4=CC=C(C)C=C4)(=O)=O	300	100	0.17	27.57	95.4
R07_11_Cat05_T300	O=C1C(N2C=C(C3=CC=C(C)C=C3)N=N2)CCCC1	Cl[Ru]N([C@H]([C@H](C1=CC=CC=C1)N([H])CCCC2=CC=CC=C2)C3=CC=CC=C3)S(C4=CC=C(C)C=C4)(=O)=O	300	100	0.17	27.57	95.2
R07_12_Cat05_T300	O=C1C(N2C=C(C3=CC=C(OC)C=C3)N=N2)CCCC1	Cl[Ru]N([C@H]([C@H](C1=CC=CC=C1)N([H])CCCC2=CC=CC=C2)C3=CC=CC=C3)S(C4=CC=C(C)C=C4)(=O)=O	300	100	0.17	27.57	89.6
R07_13_Cat05_T300	O=C1C(N2C(C=CC=C3)=C3N=N2)CCCC1	Cl[Ru]N([C@H]([C@H](C1=CC=CC=C1)N([H])CCCC2=CC=CC=C2)C3=CC=CC=C3)S(C4=CC=C(C)C=C4)(=O)=O	300	100	0.17	27.57	88.1
R07_14_Cat05_T300	O=C(CCCCC1)C1N2C=C(C3=CC=CC=C3)N=N2	Cl[Ru]N([C@H]([C@H](C1=CC=CC=C1)N([H])CCCC2=CC=CC=C2)C3=CC=CC=C3)S(C4=CC=C(C)C=C4)(=O)=O	300	100	0.17	27.57	95.5
R07_15_Cat05_T300	O=C(CCC1)C1N2C=C(C3=CC=CC=C3)N=N2	Cl[Ru]N([C@H]([C@H](C1=CC=CC=C1)N([H])CCCC2=CC=CC=C2)C3=CC=CC=C3)S(C4=CC=C(C)C=C4)(=O)=O	300	100	0.17	27.57	91.5
R8_01_Cat08_T303	O=C1CCN(C(OC(C)(C)C)=O)C2=CC=CC=C21	Cl[Rh]N([C@H]([C@H](C1=CC=CC=C1)N([H])CC(C=C(OC)C=C2)=C2C3C(C)=C(C)C(C)=C3C)C4=CC=CC=C4)S(C5=CC=C(C)C=C5)(=O)=O	303	100	0.17	27.57	99
R8_02_Cat08_T303	O=C1CCN(C(OC(C)(C)C)=O)C2=CC=C(C)C=C21	Cl[Rh]N([C@H]([C@H](C1=CC=CC=C1)N([H])CC(C=C(OC)C=C2)=C2C3C(C)=C(C)C(C)=C3C)C4=CC=CC=C4)S(C5=CC=C(C)C=C5)(=O)=O	303	100	0.17	27.57	99
R8_03_Cat08_T303	O=C1CCN(C(OC(C)(C)C)=O)C2=CC=C(OC)C=C21	Cl[Rh]N([C@H]([C@H](C1=CC=CC=C1)N([H])CC(C=C(OC)C=C2)=C2C3C(C)=C(C)C(C)=C3C)C4=CC=CC=C4)S(C5=CC=C(C)C=C5)(=O)=O	303	100	0.17	27.57	99
R8_04_Cat08_T303	O=C1CCN(C(OC(C)(C)C)=O)C2=CC(OC)=CC=C21	Cl[Rh]N([C@H]([C@H](C1=CC=CC=C1)N([H])CC(C=C(OC)C=C2)=C2C3C(C)=C(C)C(C)=C3C)C4=CC=CC=C4)S(C5=CC=C(C)C=C5)(=O)=O	303	100	0.17	27.57	99
R8_05_Cat08_T303	O=C1CCN(C(OC(C)(C)C)=O)C2=CC(OC)=C(OC)C=C21	Cl[Rh]N([C@H]([C@H](C1=CC=CC=C1)N([H])CC(C=C(OC)C=C2)=C2C3C(C)=C(C)C(C)=C3C)C4=CC=CC=C4)S(C5=CC=C(C)C=C5)(=O)=O	303	100	0.17	27.57	97
R8_06_Cat08_T303	O=C1CCN(C(OC(C)(C)C)=O)C2=CC=C(Br)C=C21	Cl[Rh]N([C@H]([C@H](C1=CC=CC=C1)N([H])CC(C=C(OC)C=C2)=C2C3C(C)=C(C)C(C)=C3C)C4=CC=CC=C4)S(C5=CC=C(C)C=C5)(=O)=O	303	100	0.17	27.57	99
R8_07_Cat08_T303	O=C1CCN(C(OC(C)(C)C)=O)C2=CC(Br)=CC=C21	Cl[Rh]N([C@H]([C@H](C1=CC=CC=C1)N([H])CC(C=C(OC)C=C2)=C2C3C(C)=C(C)C(C)=C3C)C4=CC=CC=C4)S(C5=CC=C(C)C=C5)(=O)=O	303	100	0.17	27.57	99
R8_08_Cat08_T303	O=C1CCN(C(OC(C)(C)C)=O)C2=CC=C(Cl)C=C21	Cl[Rh]N([C@H]([C@H](C1=CC=CC=C1)N([H])CC(C=C(OC)C=C2)=C2C3C(C)=C(C)C(C)=C3C)C4=CC=CC=C4)S(C5=CC=C(C)C=C5)(=O)=O	303	100	0.17	27.57	99
R8_09_Cat08_T303	O=C1CCN(C(OC(C)(C)C)=O)C2=CC(Cl)=CC=C21	Cl[Rh]N([C@H]([C@H](C1=CC=CC=C1)N([H])CC(C=C(OC)C=C2)=C2C3C(C)=C(C)C(C)=C3C)C4=CC=CC=C4)S(C5=CC=C(C)C=C5)(=O)=O	303	100	0.17	27.57	99
R8_10_Cat08_T303	O=C1CCN(C(OC(C)(C)C)=O)C2=CC=C(F)C=C21	Cl[Rh]N([C@H]([C@H](C1=CC=CC=C1)N([H])CC(C=C(OC)C=C2)=C2C3C(C)=C(C)C(C)=C3C)C4=CC=CC=C4)S(C5=CC=C(C)C=C5)(=O)=O	303	100	0.17	27.57	99
R8_11_Cat08_T303	O=C1CCN(C(OC(C)(C)C)=O)C2=CC=C(C(F)(F)F)C=C21	Cl[Rh]N([C@H]([C@H](C1=CC=CC=C1)N([H])CC(C=C(OC)C=C2)=C2C3C(C)=C(C)C(C)=C3C)C4=CC=CC=C4)S(C5=CC=C(C)C=C5)(=O)=O	303	100	0.17	27.57	99
R8_12_Cat08_T303	O=C1CCN(C(OC(C)(C)C)=O)C2=CC(C(F)(F)F)=CC=C21	Cl[Rh]N([C@H]([C@H](C1=CC=CC=C1)N([H])CC(C=C(OC)C=C2)=C2C3C(C)=C(C)C(C)=C3C)C4=CC=CC=C4)S(C5=CC=C(C)C=C5)(=O)=O	303	100	0.17	27.57	99
R09_01_Cat09_T298	O=C(CC1=NC=CC=C1)C2=CC=CC=C2	[H][Ru]N([C@H]([C@H](C1=CC=CC=C1)N([H])CC2=CC=CO2)C3=CC=CC=C3)S(C4=CC=C(C)C=C4)(=O)=O.C5=CC=CC=C5	298	100	0.17	27.57	98
R09_02_Cat09_T298	O=C(CC1=CN=CC=C1)C2=CC=CC=C2	[H][Ru]N([C@H]([C@H](C1=CC=CC=C1)N([H])CC2=CC=CO2)C3=CC=CC=C3)S(C4=CC=C(C)C=C4)(=O)=O.C5=CC=CC=C5	298	100	0.17	27.57	94
R09_03_Cat09_T298	O=C(CC1=CC=NC=C1)C2=CC=CC=C2	[H][Ru]N([C@H]([C@H](C1=CC=CC=C1)N([H])CC2=CC=CO2)C3=CC=CC=C3)S(C4=CC=C(C)C=C4)(=O)=O.C5=CC=CC=C5	298	100	0.17	27.57	95
R09_04_Cat09_T298	O=C(CC1=CC=CO1)C2=CC=CC=C2	[H][Ru]N([C@H]([C@H](C1=CC=CC=C1)N([H])CC2=CC=CO2)C3=CC=CC=C3)S(C4=CC=C(C)C=C4)(=O)=O.C5=CC=CC=C5	298	100	0.17	27.57	96
R09_05_Cat09_T298	O=C(CC1=CC(C)=NO1)C2=CC=CC=C2	[H][Ru]N([C@H]([C@H](C1=CC=CC=C1)N([H])CC2=CC=CO2)C3=CC=CC=C3)S(C4=CC=C(C)C=C4)(=O)=O.C5=CC=CC=C5	298	100	0.17	27.57	94
R09_06_Cat09_T298	O=C(CC1=CC=CS1)C2=CC=CC=C2	[H][Ru]N([C@H]([C@H](C1=CC=CC=C1)N([H])CC2=CC=CO2)C3=CC=CC=C3)S(C4=CC=C(C)C=C4)(=O)=O.C5=CC=CC=C5	298	100	0.17	27.57	94
R09_07_Cat09_T298	O=C(CC1=CC=CN1)C2=CC=CC=C2	[H][Ru]N([C@H]([C@H](C1=CC=CC=C1)N([H])CC2=CC=CO2)C3=CC=CC=C3)S(C4=CC=C(C)C=C4)(=O)=O.C5=CC=CC=C5	298	100	0.17	27.57	92
R09_08_Cat09_T298	O=C(CN1C=C(C2=CC=CC=C2)N=N1)C3=CC=CC=C3	[H][Ru]N([C@H]([C@H](C1=CC=CC=C1)N([H])CC2=CC=CO2)C3=CC=CC=C3)S(C4=CC=C(C)C=C4)(=O)=O.C5=CC=CC=C5	298	100	0.17	27.57	95
R09_09_Cat09_T298	O=C(CN1N=CN=C1)C2=CC=CC=C2	[H][Ru]N([C@H]([C@H](C1=CC=CC=C1)N([H])CC2=CC=CO2)C3=CC=CC=C3)S(C4=CC=C(C)C=C4)(=O)=O.C5=CC=CC=C5	298	100	0.17	27.57	96
R09_10_Cat09_T298	O=C(CN1C=CN=C1)C2=CC=CC=C2	[H][Ru]N([C@H]([C@H](C1=CC=CC=C1)N([H])CC2=CC=CO2)C3=CC=CC=C3)S(C4=CC=C(C)C=C4)(=O)=O.C5=CC=CC=C5	298	100	0.17	27.57	90
R09_11_Cat09_T298	O=C(CN1C=CC=C1)C2=CC=CC=C2	[H][Ru]N([C@H]([C@H](C1=CC=CC=C1)N([H])CC2=CC=CO2)C3=CC=CC=C3)S(C4=CC=C(C)C=C4)(=O)=O.C5=CC=CC=C5	298	100	0.17	27.57	95
R09_12_Cat09_T298	O=C(CN1C=CC2=C1C=CC=C2)C3=CC=CC=C3	[H][Ru]N([C@H]([C@H](C1=CC=CC=C1)N([H])CC2=CC=CO2)C3=CC=CC=C3)S(C4=CC=C(C)C=C4)(=O)=O.C5=CC=CC=C5	298	100	0.17	27.57	97
R09_13_Cat09_T298	O=C(CC1=CNC2=C1C=CC=C2)C3=CC=CC=C3	[H][Ru]N([C@H]([C@H](C1=CC=CC=C1)N([H])CC2=CC=CO2)C3=CC=CC=C3)S(C4=CC=C(C)C=C4)(=O)=O.C5=CC=CC=C5	298	100	0.17	27.57	96
R10_01_Cat05_T300	O=C(C(NC1=CC=CC=C1)=O)C2=CC=CC=C2	Cl[Ru]N([C@H]([C@H](C1=CC=CC=C1)N([H])CCCC2=CC=CC=C2)C3=CC=CC=C3)S(C4=CC=C(C)C=C4)(=O)=O	300	100	0.17	27.57	43.6
R10_02_Cat05_T300	O=C(C(NC1=CC=CC=C1)=O)C2=CC=C(F)C=C2	Cl[Ru]N([C@H]([C@H](C1=CC=CC=C1)N([H])CCCC2=CC=CC=C2)C3=CC=CC=C3)S(C4=CC=C(C)C=C4)(=O)=O	300	100	0.17	27.57	52.04
R10_03_Cat05_T300	O=C(C(NC1=CC=CC=C1)=O)C2=CC=C(Cl)C=C2	Cl[Ru]N([C@H]([C@H](C1=CC=CC=C1)N([H])CCCC2=CC=CC=C2)C3=CC=CC=C3)S(C4=CC=C(C)C=C4)(=O)=O	300	100	0.17	27.57	45.4
R10_04_Cat05_T300	O=C(C(NC1=CC=CC=C1)=O)C2=CC=C(C)C=C2	Cl[Ru]N([C@H]([C@H](C1=CC=CC=C1)N([H])CCCC2=CC=CC=C2)C3=CC=CC=C3)S(C4=CC=C(C)C=C4)(=O)=O	300	100	0.17	27.57	24.6
R10_05_Cat05_T300	O=C(C(NC1=CC=CC=C1)=O)C2=CC=C(OC)C=C2	Cl[Ru]N([C@H]([C@H](C1=CC=CC=C1)N([H])CCCC2=CC=CC=C2)C3=CC=CC=C3)S(C4=CC=C(C)C=C4)(=O)=O	300	100	0.17	27.57	34.9
R10_06_Cat05_T300	O=C(C(NC1=CC=C(C)C=C1)=O)C2=C(F)C=CC=C2	Cl[Ru]N([C@H]([C@H](C1=CC=CC=C1)N([H])CCCC2=CC=CC=C2)C3=CC=CC=C3)S(C4=CC=C(C)C=C4)(=O)=O	300	100	0.17	27.57	95.3
R10_07_Cat05_T300	O=C(C(NC1=CC=C(C)C=C1)=O)C2=C(Cl)C=CC=C2	Cl[Ru]N([C@H]([C@H](C1=CC=CC=C1)N([H])CCCC2=CC=CC=C2)C3=CC=CC=C3)S(C4=CC=C(C)C=C4)(=O)=O	300	100	0.17	27.57	29.5
R10_08_Cat05_T300	O=C(C(NC1=CC=C(C)C=C1)=O)C2=C(C)C=CC=C2	Cl[Ru]N([C@H]([C@H](C1=CC=CC=C1)N([H])CCCC2=CC=CC=C2)C3=CC=CC=C3)S(C4=CC=C(C)C=C4)(=O)=O	300	100	0.17	27.57	79.1
R10_10_Cat05_T300	O=C(C(NC1=CC=C(C)C=C1)=O)C2=C(Cl)C=CC=C2Cl	Cl[Ru]N([C@H]([C@H](C1=CC=CC=C1)N([H])CCCC2=CC=CC=C2)C3=CC=CC=C3)S(C4=CC=C(C)C=C4)(=O)=O	300	100	0.17	27.57	50
R10_11_Cat05_T300	O=C(C(NC1=CC=C(C)C=C1)=O)C2=C(OC)C=CC(OC)=C2	Cl[Ru]N([C@H]([C@H](C1=CC=CC=C1)N([H])CCCC2=CC=CC=C2)C3=CC=CC=C3)S(C4=CC=C(C)C=C4)(=O)=O	300	100	0.17	27.57	77.9
R10_12_Cat05_T300	O=C(C(NC1=CC=C(C)C=C1)=O)C2=C(C(C)C)C=C(C(C)C)C=C2C(C)C	Cl[Ru]N([C@H]([C@H](C1=CC=CC=C1)N([H])CCCC2=CC=CC=C2)C3=CC=CC=C3)S(C4=CC=C(C)C=C4)(=O)=O	300	100	0.17	27.57	94.42
R11_01_Cat05_T298	COCC(COC1=CC=CC=C1)=O	Cl[Ru]N([C@H]([C@H](C1=CC=CC=C1)N([H])CCCC2=CC=CC=C2)C3=CC=CC=C3)S(C4=CC=C(C)C=C4)(=O)=O	298	200	0.17	27.57	30
R11_02_Cat05_T298	O=C(COCCCC)COC1=CC=CC=C1	Cl[Ru]N([C@H]([C@H](C1=CC=CC=C1)N([H])CCCC2=CC=CC=C2)C3=CC=CC=C3)S(C4=CC=C(C)C=C4)(=O)=O	298	200	0.17	27.57	41
R11_03_Cat05_T298	O=C(COC(C)C)COC1=CC=CC=C1	Cl[Ru]N([C@H]([C@H](C1=CC=CC=C1)N([H])CCCC2=CC=CC=C2)C3=CC=CC=C3)S(C4=CC=C(C)C=C4)(=O)=O	298	200	0.17	27.57	39
R11_04_Cat05_T298	O=C(COC(C)C)COC1=CC=C(OC)C=C1	Cl[Ru]N([C@H]([C@H](C1=CC=CC=C1)N([H])CCCC2=CC=CC=C2)C3=CC=CC=C3)S(C4=CC=C(C)C=C4)(=O)=O	298	200	0.17	27.57	27
R11_05_Cat05_T298	O=C(COC(COC)COC)COC1=CC=CC=C1	Cl[Ru]N([C@H]([C@H](C1=CC=CC=C1)N([H])CCCC2=CC=CC=C2)C3=CC=CC=C3)S(C4=CC=C(C)C=C4)(=O)=O	298	200	0.17	27.57	46
R11_06_Cat05_T298	O=C(COCC=C)COC1=CC=CC=C1	Cl[Ru]N([C@H]([C@H](C1=CC=CC=C1)N([H])CCCC2=CC=CC=C2)C3=CC=CC=C3)S(C4=CC=C(C)C=C4)(=O)=O	298	200	0.17	27.57	37
R11_07_Cat05_T298	O=C(COCC=C)COC1=CC=C(OC)C=C1	Cl[Ru]N([C@H]([C@H](C1=CC=CC=C1)N([H])CCCC2=CC=CC=C2)C3=CC=CC=C3)S(C4=CC=C(C)C=C4)(=O)=O	298	200	0.17	27.57	31
R11_08_Cat05_T298	O=C(COC1=CC=C(OC)C=C1)COC2=CC=CC=C2	Cl[Ru]N([C@H]([C@H](C1=CC=CC=C1)N([H])CCCC2=CC=CC=C2)C3=CC=CC=C3)S(C4=CC=C(C)C=C4)(=O)=O	298	200	0.17	27.57	7
R11_09_Cat05_T298	O=C(COC1=CC=CC=C1)COC2=CC=C(Cl)C=C2	Cl[Ru]N([C@H]([C@H](C1=CC=CC=C1)N([H])CCCC2=CC=CC=C2)C3=CC=CC=C3)S(C4=CC=C(C)C=C4)(=O)=O	298	200	0.17	27.57	6
R11_10_Cat05_T298	O=C(COC1=CC=C(OC)C=C1)COC2=CC=C(Cl)C=C2	Cl[Ru]N([C@H]([C@H](C1=CC=CC=C1)N([H])CCCC2=CC=CC=C2)C3=CC=CC=C3)S(C4=CC=C(C)C=C4)(=O)=O	298	200	0.17	27.57	12
R11_11_Cat05_T298	O=C(COC1=CC=CC=C1)COC2=CC=C(NC(OC(C)(C)C)=O)C=C2	Cl[Ru]N([C@H]([C@H](C1=CC=CC=C1)N([H])CCCC2=CC=CC=C2)C3=CC=CC=C3)S(C4=CC=C(C)C=C4)(=O)=O	298	200	0.17	27.57	0
R11_12_Cat05_T298	O=C(COC(C)C)COC1=C(OC)C=CC=C1OC	Cl[Ru]N([C@H]([C@H](C1=CC=CC=C1)N([H])CCCC2=CC=CC=C2)C3=CC=CC=C3)S(C4=CC=C(C)C=C4)(=O)=O	298	200	0.17	27.57	16
R11_13_Cat05_T298	O=C(COC1=C(OC)C=CC=C1OC)COC2=CC=CC=C2	Cl[Ru]N([C@H]([C@H](C1=CC=CC=C1)N([H])CCCC2=CC=CC=C2)C3=CC=CC=C3)S(C4=CC=C(C)C=C4)(=O)=O	298	200	0.17	27.57	42
R11_14_Cat05_T298	O=C(COC1=C(OC)C=CC=C1OC)COC2=CC=C(OC)C=C2	Cl[Ru]N([C@H]([C@H](C1=CC=CC=C1)N([H])CCCC2=CC=CC=C2)C3=CC=CC=C3)S(C4=CC=C(C)C=C4)(=O)=O	298	200	0.17	27.57	33
R11_15_Cat05_T298	O=C(COC(C)C)COC1=C(NC(OC(C)(C)C)=O)C=CC=C1	Cl[Ru]N([C@H]([C@H](C1=CC=CC=C1)N([H])CCCC2=CC=CC=C2)C3=CC=CC=C3)S(C4=CC=C(C)C=C4)(=O)=O	298	200	0.17	27.57	68
R11_16_Cat05_T298	O=C(COC1=CC=CC=C1)COC2=C(NC(OC(C)(C)C)=O)C=CC=C2	Cl[Ru]N([C@H]([C@H](C1=CC=CC=C1)N([H])CCCC2=CC=CC=C2)C3=CC=CC=C3)S(C4=CC=C(C)C=C4)(=O)=O	298	200	0.17	27.57	46
R11_17_Cat05_T298	O=C(COC1=CC=C(OC)C=C1)COC2=C(NC(OC(C)(C)C)=O)C=CC=C2	Cl[Ru]N([C@H]([C@H](C1=CC=CC=C1)N([H])CCCC2=CC=CC=C2)C3=CC=CC=C3)S(C4=CC=C(C)C=C4)(=O)=O	298	200	0.17	27.57	65
R11_18_Cat05_T298	O=C(COC1=C(OC)C=CC=C1OC)COC2=C(NC(OC(C)(C)C)=O)C=CC=C2	Cl[Ru]N([C@H]([C@H](C1=CC=CC=C1)N([H])CCCC2=CC=CC=C2)C3=CC=CC=C3)S(C4=CC=C(C)C=C4)(=O)=O	298	200	0.17	27.57	59
R11_19_Cat05_T298	O=C(COC(C)C)COC1=C(Cl)C=CC=C1	Cl[Ru]N([C@H]([C@H](C1=CC=CC=C1)N([H])CCCC2=CC=CC=C2)C3=CC=CC=C3)S(C4=CC=C(C)C=C4)(=O)=O	298	200	0.17	27.57	21
R11_21_Cat05_T298	O=C(COC1=CC=CC=C1)COC2=C(N(C)C)C=CC=C2	Cl[Ru]N([C@H]([C@H](C1=CC=CC=C1)N([H])CCCC2=CC=CC=C2)C3=CC=CC=C3)S(C4=CC=C(C)C=C4)(=O)=O	298	200	0.17	27.57	0
R11_22_Cat05_T298	O=C(COC1=CC=CC=C1)COC2=C(F)C(F)=C(F)C(F)=C2F	Cl[Ru]N([C@H]([C@H](C1=CC=CC=C1)N([H])CCCC2=CC=CC=C2)C3=CC=CC=C3)S(C4=CC=C(C)C=C4)(=O)=O	298	200	0.17	27.57	27
R11_23_Cat05_T298	O=C(COC1=CC=CC=C1)COC2=CC=C(C(F)(F)F)C=C2	Cl[Ru]N([C@H]([C@H](C1=CC=CC=C1)N([H])CCCC2=CC=CC=C2)C3=CC=CC=C3)S(C4=CC=C(C)C=C4)(=O)=O	298	200	0.17	27.57	28
R11_24_Cat05_T298	O=C(COC1=CC=CC=C1)COC2=CC(C(F)(F)F)=CC=C2	Cl[Ru]N([C@H]([C@H](C1=CC=CC=C1)N([H])CCCC2=CC=CC=C2)C3=CC=CC=C3)S(C4=CC=C(C)C=C4)(=O)=O	298	200	0.17	27.57	28
R11_25_Cat05_T298	O=C(COC1=CC=CC=C1)COC2=C(C(F)(F)F)C=CC=C2	Cl[Ru]N([C@H]([C@H](C1=CC=CC=C1)N([H])CCCC2=CC=CC=C2)C3=CC=CC=C3)S(C4=CC=C(C)C=C4)(=O)=O	298	200	0.17	27.57	50
R12_01_Cat08_T323	O=C(C1=CC=CC=C1OC/2)C2=C\C3=CC=C(OC)C=C3	Cl[Rh]N([C@H]([C@H](C1=CC=CC=C1)N([H])CC(C=C(OC)C=C2)=C2C3C(C)=C(C)C(C)=C3C)C4=CC=CC=C4)S(C5=CC=C(C)C=C5)(=O)=O	323	200	-0.327467	27.0267	99
R12_02_Cat08_T323	O=C(C1=CC=CC=C1OC/2)C2=C\C3=CC(OC)=CC=C3	Cl[Rh]N([C@H]([C@H](C1=CC=CC=C1)N([H])CC(C=C(OC)C=C2)=C2C3C(C)=C(C)C(C)=C3C)C4=CC=CC=C4)S(C5=CC=C(C)C=C5)(=O)=O	323	200	-0.327467	27.0267	99
R12_03_Cat08_T323	O=C(C1=CC=CC=C1OC/2)C2=C\C3=C(OC)C=CC=C3	Cl[Rh]N([C@H]([C@H](C1=CC=CC=C1)N([H])CC(C=C(OC)C=C2)=C2C3C(C)=C(C)C(C)=C3C)C4=CC=CC=C4)S(C5=CC=C(C)C=C5)(=O)=O	323	200	-0.327467	27.0267	97
R12_04_Cat08_T323	O=C(C1=CC=CC=C1OC/2)C2=C\C3=CC=C(C)C=C3	Cl[Rh]N([C@H]([C@H](C1=CC=CC=C1)N([H])CC(C=C(OC)C=C2)=C2C3C(C)=C(C)C(C)=C3C)C4=CC=CC=C4)S(C5=CC=C(C)C=C5)(=O)=O	323	200	-0.327467	27.0267	99
R12_05_Cat08_T323	O=C(C1=CC=CC=C1OC/2)C2=C\C3=CC=C(F)C=C3	Cl[Rh]N([C@H]([C@H](C1=CC=CC=C1)N([H])CC(C=C(OC)C=C2)=C2C3C(C)=C(C)C(C)=C3C)C4=CC=CC=C4)S(C5=CC=C(C)C=C5)(=O)=O	323	200	-0.327467	27.0267	99
R12_06_Cat08_T323	O=C(C1=CC=CC=C1OC/2)C2=C\C3=CC=C(C(F)(F)F)C=C3	Cl[Rh]N([C@H]([C@H](C1=CC=CC=C1)N([H])CC(C=C(OC)C=C2)=C2C3C(C)=C(C)C(C)=C3C)C4=CC=CC=C4)S(C5=CC=C(C)C=C5)(=O)=O	323	200	-0.327467	27.0267	99
R12_07_Cat08_T323	O=C(C1=CC=CC=C1OC/2)C2=C\C3=CC(Br)=CC=C3	Cl[Rh]N([C@H]([C@H](C1=CC=CC=C1)N([H])CC(C=C(OC)C=C2)=C2C3C(C)=C(C)C(C)=C3C)C4=CC=CC=C4)S(C5=CC=C(C)C=C5)(=O)=O	323	200	-0.327467	27.0267	99
R12_08_Cat08_T323	O=C(C1=CC=CC=C1OC/2)C2=C\C3=CC=C([N+]([O-])=O)C=C3	Cl[Rh]N([C@H]([C@H](C1=CC=CC=C1)N([H])CC(C=C(OC)C=C2)=C2C3C(C)=C(C)C(C)=C3C)C4=CC=CC=C4)S(C5=CC=C(C)C=C5)(=O)=O	323	200	-0.327467	27.0267	99
R12_09_Cat08_T323	O=C(C1=CC=CC=C1OC/2)C2=C\C3=CC(OC)=C(O)C=C3	Cl[Rh]N([C@H]([C@H](C1=CC=CC=C1)N([H])CC(C=C(OC)C=C2)=C2C3C(C)=C(C)C(C)=C3C)C4=CC=CC=C4)S(C5=CC=C(C)C=C5)(=O)=O	323	200	-0.327467	27.0267	99
R12_10_Cat08_T323	O=C(C1=CC=CC=C1OC/2)C2=C\C3=CC(C=CC=C4)=C4C=C3	Cl[Rh]N([C@H]([C@H](C1=CC=CC=C1)N([H])CC(C=C(OC)C=C2)=C2C3C(C)=C(C)C(C)=C3C)C4=CC=CC=C4)S(C5=CC=C(C)C=C5)(=O)=O	323	200	-0.327467	27.0267	98
R12_11_Cat08_T323	O=C(C1=CC=CC=C1OC/2)C2=C\C3=CC=CO3	Cl[Rh]N([C@H]([C@H](C1=CC=CC=C1)N([H])CC(C=C(OC)C=C2)=C2C3C(C)=C(C)C(C)=C3C)C4=CC=CC=C4)S(C5=CC=C(C)C=C5)(=O)=O	323	200	-0.327467	27.0267	99
R12_12_Cat08_T323	O=C(C1=CC=CC=C1OC/2)C2=C\C3=CC=C(C4=CC=CC=C4)C=C3	Cl[Rh]N([C@H]([C@H](C1=CC=CC=C1)N([H])CC(C=C(OC)C=C2)=C2C3C(C)=C(C)C(C)=C3C)C4=CC=CC=C4)S(C5=CC=C(C)C=C5)(=O)=O	323	200	-0.327467	27.0267	99
R12_13_Cat08_T323	O=C(C1=CC=CC=C1OC/2)C2=C\C=C(C)\CC/C=C(C)/C	Cl[Rh]N([C@H]([C@H](C1=CC=CC=C1)N([H])CC(C=C(OC)C=C2)=C2C3C(C)=C(C)C(C)=C3C)C4=CC=CC=C4)S(C5=CC=C(C)C=C5)(=O)=O	323	200	-0.327467	27.0267	99
R13_01_Cat05_T298	CN(CC1=CC=CC=C1)C(C(CC(N(C)C2=CC=CC=C2)=O)=O)=O	Cl[Ru]N([C@H]([C@H](C1=CC=CC=C1)N([H])CCCC2=CC=CC=C2)C3=CC=CC=C3)S(C4=CC=C(C)C=C4)(=O)=O	298	67	0.17	27.57	77
R13_02_Cat05_T298	CN(CC1=CC=CC=C1)C(C(CC(N(C)CC2=CC=CC=C2)=O)=O)=O	Cl[Ru]N([C@H]([C@H](C1=CC=CC=C1)N([H])CCCC2=CC=CC=C2)C3=CC=CC=C3)S(C4=CC=C(C)C=C4)(=O)=O	298	67	0.17	27.57	94
R13_04_Cat05_T298	CN(C1CCCCC1)C(C(CC(N(C)C2=CC=CC=C2)=O)=O)=O	Cl[Ru]N([C@H]([C@H](C1=CC=CC=C1)N([H])CCCC2=CC=CC=C2)C3=CC=CC=C3)S(C4=CC=C(C)C=C4)(=O)=O	298	67	0.17	27.57	79
R13_06_Cat05_T298	CN(CC=C)C(C(CC(N(C)C1=CC=CC=C1)=O)=O)=O	Cl[Ru]N([C@H]([C@H](C1=CC=CC=C1)N([H])CCCC2=CC=CC=C2)C3=CC=CC=C3)S(C4=CC=C(C)C=C4)(=O)=O	298	67	0.17	27.57	77
R13_07_Cat05_T298	CN(CC#C)C(C(CC(N(C)C1=CC=CC=C1)=O)=O)=O	Cl[Ru]N([C@H]([C@H](C1=CC=CC=C1)N([H])CCCC2=CC=CC=C2)C3=CC=CC=C3)S(C4=CC=C(C)C=C4)(=O)=O	298	67	0.17	27.57	88
R13_08_Cat05_T298	CN(CC=C)C(C(CC(N(C)CC=C)=O)=O)=O	Cl[Ru]N([C@H]([C@H](C1=CC=CC=C1)N([H])CCCC2=CC=CC=C2)C3=CC=CC=C3)S(C4=CC=C(C)C=C4)(=O)=O	298	67	0.17	27.57	94
R13_10_Cat05_T298	O=C(C(CC(N(C)C1=CC=CC=C1)=O)=O)NC2=CC=CC=C2	Cl[Ru]N([C@H]([C@H](C1=CC=CC=C1)N([H])CCCC2=CC=CC=C2)C3=CC=CC=C3)S(C4=CC=C(C)C=C4)(=O)=O	298	67	0.17	27.57	91
R13_11_Cat05_T298	S=C(C(CC(N(C)C1=CC=CC=C1)=O)=O)NC2=CC=CC=C2	Cl[Ru]N([C@H]([C@H](C1=CC=CC=C1)N([H])CCCC2=CC=CC=C2)C3=CC=CC=C3)S(C4=CC=C(C)C=C4)(=O)=O	298	67	0.17	27.57	89
R13_12_Cat05_T298	O=C(C(CC(N([H])C1=CC=CC=C1)=O)=O)NC2=CC=CC=C2	Cl[Ru]N([C@H]([C@H](C1=CC=CC=C1)N([H])CCCC2=CC=CC=C2)C3=CC=CC=C3)S(C4=CC=C(C)C=C4)(=O)=O	298	67	0.17	27.57	95
R13_14_Cat05_T298	O=C(C(CC(N1CCCCC1)=O)=O)N(C)C2=CC=CC=C2	Cl[Ru]N([C@H]([C@H](C1=CC=CC=C1)N([H])CCCC2=CC=CC=C2)C3=CC=CC=C3)S(C4=CC=C(C)C=C4)(=O)=O	298	67	0.17	27.57	89
R13_15_Cat05_T298	O=C(C(CC(N1CCCCC1)=O)=O)N2CCCCC2	Cl[Ru]N([C@H]([C@H](C1=CC=CC=C1)N([H])CCCC2=CC=CC=C2)C3=CC=CC=C3)S(C4=CC=C(C)C=C4)(=O)=O	298	67	0.17	27.57	92
R13_16_Cat05_T298	O=C(C(CC(N1CCCCC1)=O)=O)N2CCOCC2	Cl[Ru]N([C@H]([C@H](C1=CC=CC=C1)N([H])CCCC2=CC=CC=C2)C3=CC=CC=C3)S(C4=CC=C(C)C=C4)(=O)=O	298	67	0.17	27.57	92
R13_17_Cat05_T298	O=C(C(CC(N1CCCCC1)=O)=O)NC2=CC=CC=C2	Cl[Ru]N([C@H]([C@H](C1=CC=CC=C1)N([H])CCCC2=CC=CC=C2)C3=CC=CC=C3)S(C4=CC=C(C)C=C4)(=O)=O	298	67	0.17	27.57	97
R13_18_Cat05_T298	O=C(C(CC(N1CCCCC1)=O)=O)NC2=CC=C(Cl)C=C2	Cl[Ru]N([C@H]([C@H](C1=CC=CC=C1)N([H])CCCC2=CC=CC=C2)C3=CC=CC=C3)S(C4=CC=C(C)C=C4)(=O)=O	298	67	0.17	27.57	97
R13_19_Cat05_T298	O=C(C(CC(N1CCCCC1)=O)=O)NC2=CC=CC=C2Cl	Cl[Ru]N([C@H]([C@H](C1=CC=CC=C1)N([H])CCCC2=CC=CC=C2)C3=CC=CC=C3)S(C4=CC=C(C)C=C4)(=O)=O	298	67	0.17	27.57	98
R13_20_Cat05_T298	O=C(C(CC(N1CCCCC1)=O)=O)NC2=C(C(C)C)C=CC=C2C(C)C	Cl[Ru]N([C@H]([C@H](C1=CC=CC=C1)N([H])CCCC2=CC=CC=C2)C3=CC=CC=C3)S(C4=CC=C(C)C=C4)(=O)=O	298	67	0.17	27.57	99
R13_21_Cat05_T298	O=C(C(CC(N1CCCCC1)=O)=O)NC2CCCCC2	Cl[Ru]N([C@H]([C@H](C1=CC=CC=C1)N([H])CCCC2=CC=CC=C2)C3=CC=CC=C3)S(C4=CC=C(C)C=C4)(=O)=O	298	67	0.17	27.57	97
R13_22_Cat05_T298	CNC(C(CC(N1CCCCC1)=O)=O)=O	Cl[Ru]N([C@H]([C@H](C1=CC=CC=C1)N([H])CCCC2=CC=CC=C2)C3=CC=CC=C3)S(C4=CC=C(C)C=C4)(=O)=O	298	67	0.17	27.57	95
R13_23_Cat05_T298	O=C(C(CC(N1CCCCC1)=O)=O)NC2CC2	Cl[Ru]N([C@H]([C@H](C1=CC=CC=C1)N([H])CCCC2=CC=CC=C2)C3=CC=CC=C3)S(C4=CC=C(C)C=C4)(=O)=O	298	67	0.17	27.57	98
R13_24_Cat05_T298	O=C(N1CCCCC1)CCC(C(NC2=CC=CC=C2)=O)=O	Cl[Ru]N([C@H]([C@H](C1=CC=CC=C1)N([H])CCCC2=CC=CC=C2)C3=CC=CC=C3)S(C4=CC=C(C)C=C4)(=O)=O	298	67	0.17	27.57	94
R13_25_Cat05_T298	O=C(C(CC(N1CCCCC1)=O)=O)OCC	Cl[Ru]N([C@H]([C@H](C1=CC=CC=C1)N([H])CCCC2=CC=CC=C2)C3=CC=CC=C3)S(C4=CC=C(C)C=C4)(=O)=O	298	67	0.17	27.57	98
R13_26_Cat05_T298	O=C(C(CC(OCC)=O)=O)NC1=C(C(C)C)C=CC=C1C(C)C	Cl[Ru]N([C@H]([C@H](C1=CC=CC=C1)N([H])CCCC2=CC=CC=C2)C3=CC=CC=C3)S(C4=CC=C(C)C=C4)(=O)=O	298	67	0.17	27.57	98
R13_28_Cat05_T298	O=C(C(CCCC)=O)NC1=C(C(C)C)C=CC=C1C(C)C	Cl[Ru]N([C@H]([C@H](C1=CC=CC=C1)N([H])CCCC2=CC=CC=C2)C3=CC=CC=C3)S(C4=CC=C(C)C=C4)(=O)=O	298	67	0.17	27.57	97
R13_31_Cat05_T298	O=C(C(CC(OCC)=O)=O)N(C)CC1=CC=CC=C1	Cl[Ru]N([C@H]([C@H](C1=CC=CC=C1)N([H])CCCC2=CC=CC=C2)C3=CC=CC=C3)S(C4=CC=C(C)C=C4)(=O)=O	298	67	0.17	27.57	90
R13_32_Cat05_T298	O=C(C(CC(OCC)=O)=O)N1CCCCC1	Cl[Ru]N([C@H]([C@H](C1=CC=CC=C1)N([H])CCCC2=CC=CC=C2)C3=CC=CC=C3)S(C4=CC=C(C)C=C4)(=O)=O	298	67	0.17	27.57	94
R13_33_Cat05_T298	O=C(C(CC(OCC)=O)=O)N1CCOCC1	Cl[Ru]N([C@H]([C@H](C1=CC=CC=C1)N([H])CCCC2=CC=CC=C2)C3=CC=CC=C3)S(C4=CC=C(C)C=C4)(=O)=O	298	67	0.17	27.57	92
R13_34_Cat05_T298	O=C(C(CCCC)=O)NC1=CC=CC=C1	Cl[Ru]N([C@H]([C@H](C1=CC=CC=C1)N([H])CCCC2=CC=CC=C2)C3=CC=CC=C3)S(C4=CC=C(C)C=C4)(=O)=O	298	67	0.17	27.57	93
R13_35_Cat05_T298	O=C(C(CCCC)=O)NCC	Cl[Ru]N([C@H]([C@H](C1=CC=CC=C1)N([H])CCCC2=CC=CC=C2)C3=CC=CC=C3)S(C4=CC=C(C)C=C4)(=O)=O	298	67	0.17	27.57	90
R13_36_Cat05_T298	O=C(C(CCCC)=O)OCC	Cl[Ru]N([C@H]([C@H](C1=CC=CC=C1)N([H])CCCC2=CC=CC=C2)C3=CC=CC=C3)S(C4=CC=C(C)C=C4)(=O)=O	298	67	0.17	27.57	80
R14_01_Cat05_T298	CC(C=C1)=CC=C1C(C2(C3)CC3(C2)C4=CC=CC=C4)=O	Cl[Ru]N([C@H]([C@H](C1=CC=CC=C1)N([H])CCCC2=CC=CC=C2)C3=CC=CC=C3)S(C4=CC=C(C)C=C4)(=O)=O	298	100	0.17	27.57	99
R14_02_Cat05_T298	O=C(C1=CC=CC(C)=C1)C2(C3)CC3(C2)C4=CC=CC=C4	Cl[Ru]N([C@H]([C@H](C1=CC=CC=C1)N([H])CCCC2=CC=CC=C2)C3=CC=CC=C3)S(C4=CC=C(C)C=C4)(=O)=O	298	100	0.17	27.57	93
R14_03_Cat05_T298	O=C(C1=CC=C(C(C)(C)C)C=C1)C2(C3)CC3(C2)C4=CC=CC=C4	Cl[Ru]N([C@H]([C@H](C1=CC=CC=C1)N([H])CCCC2=CC=CC=C2)C3=CC=CC=C3)S(C4=CC=C(C)C=C4)(=O)=O	298	100	0.17	27.57	99
R14_04_Cat05_T298	O=C(C1=CC=C(C(C)C)C=C1)C2(C3)CC3(C2)C4=CC=CC=C4	Cl[Ru]N([C@H]([C@H](C1=CC=CC=C1)N([H])CCCC2=CC=CC=C2)C3=CC=CC=C3)S(C4=CC=C(C)C=C4)(=O)=O	298	100	0.17	27.57	99
R14_05_Cat05_T298	FC(C=C1)=CC=C1C(C2(C3)CC3(C2)C4=CC=CC=C4)=O	Cl[Ru]N([C@H]([C@H](C1=CC=CC=C1)N([H])CCCC2=CC=CC=C2)C3=CC=CC=C3)S(C4=CC=C(C)C=C4)(=O)=O	298	100	0.17	27.57	84
R14_06_Cat05_T298	O=C(C1=CC=C(C(F)(F)F)C=C1)C2(C3)CC3(C2)C4=CC=CC=C4	Cl[Ru]N([C@H]([C@H](C1=CC=CC=C1)N([H])CCCC2=CC=CC=C2)C3=CC=CC=C3)S(C4=CC=C(C)C=C4)(=O)=O	298	100	0.17	27.57	70
R14_07_Cat05_T298	O=C(C1=CC=C(OC)C=C1)C2(C3)CC3(C2)C4=CC=CC=C4	Cl[Ru]N([C@H]([C@H](C1=CC=CC=C1)N([H])CCCC2=CC=CC=C2)C3=CC=CC=C3)S(C4=CC=C(C)C=C4)(=O)=O	298	100	0.17	27.57	98
R14_08_Cat05_T298	O=C(C1=CC(OC)=CC(OC)=C1)C2(C3)CC3(C2)C4=CC=CC=C4	Cl[Ru]N([C@H]([C@H](C1=CC=CC=C1)N([H])CCCC2=CC=CC=C2)C3=CC=CC=C3)S(C4=CC=C(C)C=C4)(=O)=O	298	100	0.17	27.57	90
R14_09_Cat05_T298	O=C(C1=CC(OC)=C(OC)C(OC)=C1)C2(C3)CC3(C2)C4=CC=CC=C4	Cl[Ru]N([C@H]([C@H](C1=CC=CC=C1)N([H])CCCC2=CC=CC=C2)C3=CC=CC=C3)S(C4=CC=C(C)C=C4)(=O)=O	298	100	0.17	27.57	88
R14_10_Cat05_T298	O=C(C1=CC=C(OC2=CC=CC=C2)C=C1)C3(C4)CC4(C3)C5=CC=CC=C5	Cl[Ru]N([C@H]([C@H](C1=CC=CC=C1)N([H])CCCC2=CC=CC=C2)C3=CC=CC=C3)S(C4=CC=C(C)C=C4)(=O)=O	298	100	0.17	27.57	85
R14_11_Cat05_T298	O=C(C1=CC=C(N2CCCCC2)C=C1)C3(C4)CC4(C3)C5=CC=CC=C5	Cl[Ru]N([C@H]([C@H](C1=CC=CC=C1)N([H])CCCC2=CC=CC=C2)C3=CC=CC=C3)S(C4=CC=C(C)C=C4)(=O)=O	298	100	0.17	27.57	97
R14_12_Cat05_T298	O=C(C1=CC=C(Br)C=C1)C2(C3)CC3(C2)C4=CC=CC=C4	Cl[Ru]N([C@H]([C@H](C1=CC=CC=C1)N([H])CCCC2=CC=CC=C2)C3=CC=CC=C3)S(C4=CC=C(C)C=C4)(=O)=O	298	100	0.17	27.57	81
R14_13_Cat05_T298	O=C(C1=CC=CO1)C2(C3)CC3(C2)C4=CC=CC=C4	Cl[Ru]N([C@H]([C@H](C1=CC=CC=C1)N([H])CCCC2=CC=CC=C2)C3=CC=CC=C3)S(C4=CC=C(C)C=C4)(=O)=O	298	100	0.17	27.57	99
R14_14_Cat05_T298	O=C(C1=CC=CS1)C2(C3)CC3(C2)C4=CC=CC=C4	Cl[Ru]N([C@H]([C@H](C1=CC=CC=C1)N([H])CCCC2=CC=CC=C2)C3=CC=CC=C3)S(C4=CC=C(C)C=C4)(=O)=O	298	100	0.17	27.57	99
R14_15_Cat05_T298	O=C(C1=CC=CC=N1)C2(C3)CC3(C2)C4=CC=CC=C4	Cl[Ru]N([C@H]([C@H](C1=CC=CC=C1)N([H])CCCC2=CC=CC=C2)C3=CC=CC=C3)S(C4=CC=C(C)C=C4)(=O)=O	298	100	0.17	27.57	91
R14_16_Cat05_T298	O=C(/C=C/C1=CC=CC=C1)C2(C3)CC3(C2)C4=CC=CC=C4	Cl[Ru]N([C@H]([C@H](C1=CC=CC=C1)N([H])CCCC2=CC=CC=C2)C3=CC=CC=C3)S(C4=CC=C(C)C=C4)(=O)=O	298	100	0.17	27.57	41
R14_17_Cat05_T298	O=C(C#CC1=CC=CC=C1)C2(C3)CC3(C2)C4=CC=CC=C4	Cl[Ru]N([C@H]([C@H](C1=CC=CC=C1)N([H])CCCC2=CC=CC=C2)C3=CC=CC=C3)S(C4=CC=C(C)C=C4)(=O)=O	298	100	0.17	27.57	95
R14_18_Cat05_T298	O=C(C#CC1=CC=C(OC)C=C1)C2(C3)CC3(C2)C4=CC=CC=C4	Cl[Ru]N([C@H]([C@H](C1=CC=CC=C1)N([H])CCCC2=CC=CC=C2)C3=CC=CC=C3)S(C4=CC=C(C)C=C4)(=O)=O	298	100	0.17	27.57	95
R14_19_Cat05_T298	O=C(C#CCCCCC)C1(C2)CC2(C1)C3=CC=CC=C3	Cl[Ru]N([C@H]([C@H](C1=CC=CC=C1)N([H])CCCC2=CC=CC=C2)C3=CC=CC=C3)S(C4=CC=C(C)C=C4)(=O)=O	298	100	0.17	27.57	97
R14_20_Cat05_T298	O=C(C#C[Si](C)(C)C)C1(C2)CC2(C1)C3=CC=CC=C3	Cl[Ru]N([C@H]([C@H](C1=CC=CC=C1)N([H])CCCC2=CC=CC=C2)C3=CC=CC=C3)S(C4=CC=C(C)C=C4)(=O)=O	298	100	0.17	27.57	99
R14_21_Cat05_T298	O=C(C#CC1=CC=C(Cl)C=C1)C2(C3)CC3(C2)C4=CC=CC=C4	Cl[Ru]N([C@H]([C@H](C1=CC=CC=C1)N([H])CCCC2=CC=CC=C2)C3=CC=CC=C3)S(C4=CC=C(C)C=C4)(=O)=O	298	100	0.17	27.57	96
R14_22_Cat05_T298	O=C(C#CC1=CC=CC=C1OC)C2(C3)CC3(C2)C4=CC=CC=C4	Cl[Ru]N([C@H]([C@H](C1=CC=CC=C1)N([H])CCCC2=CC=CC=C2)C3=CC=CC=C3)S(C4=CC=C(C)C=C4)(=O)=O	298	100	0.17	27.57	97
R15_01_Cat08_T273	O=C(C(NC(C1=CC=CC=C1)=O)C(OC)=O)C2=CC=CC=C2	Cl[Rh]N([C@H]([C@H](C1=CC=CC=C1)N([H])CC(C=C(OC)C=C2)=C2C3C(C)=C(C)C(C)=C3C)C4=CC=CC=C4)S(C5=CC=C(C)C=C5)(=O)=O	273	200	0.17	27.57	99
R15_02_Cat08_T273	O=C(C(NC(C1=CC=CC=C1)=O)C(OC)=O)C2=CC(C)=CC=C2	Cl[Rh]N([C@H]([C@H](C1=CC=CC=C1)N([H])CC(C=C(OC)C=C2)=C2C3C(C)=C(C)C(C)=C3C)C4=CC=CC=C4)S(C5=CC=C(C)C=C5)(=O)=O	273	200	0.17	27.57	99
R15_03_Cat08_T273	O=C(C(NC(C1=CC=CC=C1)=O)C(OC)=O)C2=CC=C(C)C=C2	Cl[Rh]N([C@H]([C@H](C1=CC=CC=C1)N([H])CC(C=C(OC)C=C2)=C2C3C(C)=C(C)C(C)=C3C)C4=CC=CC=C4)S(C5=CC=C(C)C=C5)(=O)=O	273	200	0.17	27.57	99
R15_04_Cat08_T273	O=C(C(NC(C1=CC=CC=C1)=O)C(OC)=O)C2=CC(C=CC=C3)=C3C=C2	Cl[Rh]N([C@H]([C@H](C1=CC=CC=C1)N([H])CC(C=C(OC)C=C2)=C2C3C(C)=C(C)C(C)=C3C)C4=CC=CC=C4)S(C5=CC=C(C)C=C5)(=O)=O	273	200	0.17	27.57	99
R15_05_Cat08_T273	O=C(C(NC(C1=CC=CC=C1)=O)C(OC)=O)C2=CC=C(OC)C=C2	Cl[Rh]N([C@H]([C@H](C1=CC=CC=C1)N([H])CC(C=C(OC)C=C2)=C2C3C(C)=C(C)C(C)=C3C)C4=CC=CC=C4)S(C5=CC=C(C)C=C5)(=O)=O	273	200	0.17	27.57	99
R15_06_Cat08_T273	O=C(C(NC(C1=CC=CC=C1)=O)C(OC)=O)C2=CC(OCO3)=C3C=C2	Cl[Rh]N([C@H]([C@H](C1=CC=CC=C1)N([H])CC(C=C(OC)C=C2)=C2C3C(C)=C(C)C(C)=C3C)C4=CC=CC=C4)S(C5=CC=C(C)C=C5)(=O)=O	273	200	0.17	27.57	99
R15_07_Cat08_T273	O=C(C(NC(C1=CC=CC=C1)=O)C(OC)=O)C2=CC=C(F)C=C2	Cl[Rh]N([C@H]([C@H](C1=CC=CC=C1)N([H])CC(C=C(OC)C=C2)=C2C3C(C)=C(C)C(C)=C3C)C4=CC=CC=C4)S(C5=CC=C(C)C=C5)(=O)=O	273	200	0.17	27.57	99
R15_08_Cat08_T273	O=C(C(NC(C1=CC=CC=C1)=O)C(OC)=O)C2=CC=C(Cl)C=C2	Cl[Rh]N([C@H]([C@H](C1=CC=CC=C1)N([H])CC(C=C(OC)C=C2)=C2C3C(C)=C(C)C(C)=C3C)C4=CC=CC=C4)S(C5=CC=C(C)C=C5)(=O)=O	273	200	0.17	27.57	99
R15_09_Cat08_T273	O=C(C(NC(C1=CC=CC=C1)=O)C(OC)=O)C2=CC=C(Br)C=C2	Cl[Rh]N([C@H]([C@H](C1=CC=CC=C1)N([H])CC(C=C(OC)C=C2)=C2C3C(C)=C(C)C(C)=C3C)C4=CC=CC=C4)S(C5=CC=C(C)C=C5)(=O)=O	273	200	0.17	27.57	99
R15_10_Cat08_T273	O=C(C(NC(C1=CC=CC=C1)=O)C(OC)=O)C2=C(C)C=CC=C2	Cl[Rh]N([C@H]([C@H](C1=CC=CC=C1)N([H])CC(C=C(OC)C=C2)=C2C3C(C)=C(C)C(C)=C3C)C4=CC=CC=C4)S(C5=CC=C(C)C=C5)(=O)=O	273	200	0.17	27.57	99
R15_11_Cat08_T273	O=C(C(NC(C1=CC=CC=C1)=O)C(OC)=O)C2=NC=CC=C2	Cl[Rh]N([C@H]([C@H](C1=CC=CC=C1)N([H])CC(C=C(OC)C=C2)=C2C3C(C)=C(C)C(C)=C3C)C4=CC=CC=C4)S(C5=CC=C(C)C=C5)(=O)=O	273	200	0.17	27.57	99
R15_12_Cat08_T273	O=C(C(NC(C1=CC=CC=C1)=O)C(OC)=O)C2=CN=CC=C2	Cl[Rh]N([C@H]([C@H](C1=CC=CC=C1)N([H])CC(C=C(OC)C=C2)=C2C3C(C)=C(C)C(C)=C3C)C4=CC=CC=C4)S(C5=CC=C(C)C=C5)(=O)=O	273	200	0.17	27.57	99
R15_13_Cat08_T273	O=C(C(NC(C1=CC=CC=C1)=O)C(OC)=O)C2=NC(C=CC=C3)=C3C=C2	Cl[Rh]N([C@H]([C@H](C1=CC=CC=C1)N([H])CC(C=C(OC)C=C2)=C2C3C(C)=C(C)C(C)=C3C)C4=CC=CC=C4)S(C5=CC=C(C)C=C5)(=O)=O	273	200	0.17	27.57	99
R15_14_Cat08_T273	O=C(C(NC(C1=CC=CC=C1)=O)C(OC)=O)C2=CC=CO2	Cl[Rh]N([C@H]([C@H](C1=CC=CC=C1)N([H])CC(C=C(OC)C=C2)=C2C3C(C)=C(C)C(C)=C3C)C4=CC=CC=C4)S(C5=CC=C(C)C=C5)(=O)=O	273	200	0.17	27.57	99
R15_16_Cat08_T273	O=C(C(NC(C1=CC=CC=C1)=O)C(OC)=O)CCCCC	Cl[Rh]N([C@H]([C@H](C1=CC=CC=C1)N([H])CC(C=C(OC)C=C2)=C2C3C(C)=C(C)C(C)=C3C)C4=CC=CC=C4)S(C5=CC=C(C)C=C5)(=O)=O	273	200	0.17	27.57	99
R15_17_Cat08_T273	O=C(C(NC(C1=CC=CC=C1)=O)C(OC)=O)CCC2=CC=CC=C2	Cl[Rh]N([C@H]([C@H](C1=CC=CC=C1)N([H])CC(C=C(OC)C=C2)=C2C3C(C)=C(C)C(C)=C3C)C4=CC=CC=C4)S(C5=CC=C(C)C=C5)(=O)=O	273	200	0.17	27.57	99
R15_18_Cat08_T273	O=C(C(NC(C1=CC=CC=C1)=O)C(OC)=O)C(C)C	Cl[Rh]N([C@H]([C@H](C1=CC=CC=C1)N([H])CC(C=C(OC)C=C2)=C2C3C(C)=C(C)C(C)=C3C)C4=CC=CC=C4)S(C5=CC=C(C)C=C5)(=O)=O	273	200	0.17	27.57	99
R15_19_Cat08_T273	O=C(C(NC(C1=CC=CC=C1)=O)C(OC)=O)C#CCCCCC	Cl[Rh]N([C@H]([C@H](C1=CC=CC=C1)N([H])CC(C=C(OC)C=C2)=C2C3C(C)=C(C)C(C)=C3C)C4=CC=CC=C4)S(C5=CC=C(C)C=C5)(=O)=O	273	200	0.17	27.57	99
R15_01_Cat14_T273_02	O=C(C(NC(C1=CC=CC=C1)=O)C(OC)=O)C2=CC=CC=C2	N[C@@H](C1=CC=CC=C1)[C@@H](N([Ru]Cl)S(C2=CC=C(C)C=C2)(=O)=O)C3=CC=CC=C3.C4=CC=CC=C4	273	200	0.17	27.57	28
R15_01_Cat06_T273_03	O=C(C(NC(C1=CC=CC=C1)=O)C(OC)=O)C2=CC=CC=C2	Cl[Ru]N([C@H]([C@H](C1=CC=CC=C1)N([H])CCOCC2=CC=C(C)C=C2)C3=CC=CC=C3)S(C4=CC=C(C)C=C4)(=O)=O	273	200	0.17	27.57	25
R15_01_Cat05_T273_04	O=C(C(NC(C1=CC=CC=C1)=O)C(OC)=O)C2=CC=CC=C2	Cl[Ru]N([C@H]([C@H](C1=CC=CC=C1)N([H])CCCC2=CC=CC=C2)C3=CC=CC=C3)S(C4=CC=C(C)C=C4)(=O)=O	273	200	0.17	27.57	36
R16_01_Cat10_T313	O=C(C1CC1)/C=C/C2=CC=CC=C2	N[C@@H](C1=CC=CC=C1)[C@@H](N(S(=O)(C2=CC=C(C(F)(F)F)C=C2)=O)[Ru]Cl)C3=CC=CC=C3.CC(C)C4=CC=C(C)C=C4	313	20	0.17	27.57	81
R16_02_Cat10_T313	O=C(C1CC1)/C=C/C2=C(F)C=CC=C2	N[C@@H](C1=CC=CC=C1)[C@@H](N(S(=O)(C2=CC=C(C(F)(F)F)C=C2)=O)[Ru]Cl)C3=CC=CC=C3.CC(C)C4=CC=C(C)C=C4	313	20	0.17	27.57	77
R16_03_Cat10_T313	O=C(C1CC1)/C=C/C2=C(Cl)C=CC=C2	N[C@@H](C1=CC=CC=C1)[C@@H](N(S(=O)(C2=CC=C(C(F)(F)F)C=C2)=O)[Ru]Cl)C3=CC=CC=C3.CC(C)C4=CC=C(C)C=C4	313	20	0.17	27.57	85
R16_04_Cat10_T313	O=C(C1CC1)/C=C/C2=C(Br)C=CC=C2	N[C@@H](C1=CC=CC=C1)[C@@H](N(S(=O)(C2=CC=C(C(F)(F)F)C=C2)=O)[Ru]Cl)C3=CC=CC=C3.CC(C)C4=CC=C(C)C=C4	313	20	0.17	27.57	83
R16_05_Cat10_T313	O=C(C1CC1)/C=C/C2=C(C(F)(F)F)C=CC=C2	N[C@@H](C1=CC=CC=C1)[C@@H](N(S(=O)(C2=CC=C(C(F)(F)F)C=C2)=O)[Ru]Cl)C3=CC=CC=C3.CC(C)C4=CC=C(C)C=C4	313	20	0.17	27.57	86
R16_06_Cat10_T313	O=C(C1CC1)/C=C/C2=C(C)C=CC=C2	N[C@@H](C1=CC=CC=C1)[C@@H](N(S(=O)(C2=CC=C(C(F)(F)F)C=C2)=O)[Ru]Cl)C3=CC=CC=C3.CC(C)C4=CC=C(C)C=C4	313	20	0.17	27.57	81
R16_07_Cat10_T313	O=C(C1CC1)/C=C/C2=C(OCC3=CC=CC=C3)C=CC=C2	N[C@@H](C1=CC=CC=C1)[C@@H](N(S(=O)(C2=CC=C(C(F)(F)F)C=C2)=O)[Ru]Cl)C3=CC=CC=C3.CC(C)C4=CC=C(C)C=C4	313	20	0.17	27.57	70
R16_08_Cat10_T313	O=C(C1CC1)/C=C/C2=CC(F)=CC=C2	N[C@@H](C1=CC=CC=C1)[C@@H](N(S(=O)(C2=CC=C(C(F)(F)F)C=C2)=O)[Ru]Cl)C3=CC=CC=C3.CC(C)C4=CC=C(C)C=C4	313	20	0.17	27.57	85
R16_09_Cat10_T313	O=C(C1CC1)/C=C/C2=CC(Cl)=CC=C2	N[C@@H](C1=CC=CC=C1)[C@@H](N(S(=O)(C2=CC=C(C(F)(F)F)C=C2)=O)[Ru]Cl)C3=CC=CC=C3.CC(C)C4=CC=C(C)C=C4	313	20	0.17	27.57	85
R16_10_Cat10_T313	O=C(C1CC1)/C=C/C2=CC(Br)=CC=C2	N[C@@H](C1=CC=CC=C1)[C@@H](N(S(=O)(C2=CC=C(C(F)(F)F)C=C2)=O)[Ru]Cl)C3=CC=CC=C3.CC(C)C4=CC=C(C)C=C4	313	20	0.17	27.57	84
R16_11_Cat10_T313	O=C(C1CC1)/C=C/C2=CC([N+]([O-])=O)=CC=C2	N[C@@H](C1=CC=CC=C1)[C@@H](N(S(=O)(C2=CC=C(C(F)(F)F)C=C2)=O)[Ru]Cl)C3=CC=CC=C3.CC(C)C4=CC=C(C)C=C4	313	20	0.17	27.57	85
R16_12_Cat10_T313	O=C(C1CC1)/C=C/C2=CC(C)=CC=C2	N[C@@H](C1=CC=CC=C1)[C@@H](N(S(=O)(C2=CC=C(C(F)(F)F)C=C2)=O)[Ru]Cl)C3=CC=CC=C3.CC(C)C4=CC=C(C)C=C4	313	20	0.17	27.57	74
R16_13_Cat10_T313	O=C(C1CC1)/C=C/C2=CC(OC)=CC=C2	N[C@@H](C1=CC=CC=C1)[C@@H](N(S(=O)(C2=CC=C(C(F)(F)F)C=C2)=O)[Ru]Cl)C3=CC=CC=C3.CC(C)C4=CC=C(C)C=C4	313	20	0.17	27.57	81
R16_14_Cat10_T313	O=C(C1CC1)/C=C/C2=CC=C(Cl)C=C2	N[C@@H](C1=CC=CC=C1)[C@@H](N(S(=O)(C2=CC=C(C(F)(F)F)C=C2)=O)[Ru]Cl)C3=CC=CC=C3.CC(C)C4=CC=C(C)C=C4	313	20	0.17	27.57	79
R16_15_Cat10_T313	O=C(C1CC1)/C=C/C2=CC=C(Br)C=C2	N[C@@H](C1=CC=CC=C1)[C@@H](N(S(=O)(C2=CC=C(C(F)(F)F)C=C2)=O)[Ru]Cl)C3=CC=CC=C3.CC(C)C4=CC=C(C)C=C4	313	20	0.17	27.57	79
R16_16_Cat10_T313	O=C(C1CC1)/C=C/C2=CC=C(C(F)(F)F)C=C2	N[C@@H](C1=CC=CC=C1)[C@@H](N(S(=O)(C2=CC=C(C(F)(F)F)C=C2)=O)[Ru]Cl)C3=CC=CC=C3.CC(C)C4=CC=C(C)C=C4	313	20	0.17	27.57	82
R16_17_Cat10_T313	O=C(C1CC1)/C=C/C2=CC=C([N+]([O-])=O)C=C2	N[C@@H](C1=CC=CC=C1)[C@@H](N(S(=O)(C2=CC=C(C(F)(F)F)C=C2)=O)[Ru]Cl)C3=CC=CC=C3.CC(C)C4=CC=C(C)C=C4	313	20	0.17	27.57	78
R16_18_Cat10_T313	O=C(C1CC1)/C=C/C2=CC=C(C)C=C2	N[C@@H](C1=CC=CC=C1)[C@@H](N(S(=O)(C2=CC=C(C(F)(F)F)C=C2)=O)[Ru]Cl)C3=CC=CC=C3.CC(C)C4=CC=C(C)C=C4	313	20	0.17	27.57	78
R16_19_Cat10_T313	O=C(C1CC1)/C=C/C2=CC=C(C(C)(C)C)C=C2	N[C@@H](C1=CC=CC=C1)[C@@H](N(S(=O)(C2=CC=C(C(F)(F)F)C=C2)=O)[Ru]Cl)C3=CC=CC=C3.CC(C)C4=CC=C(C)C=C4	313	20	0.17	27.57	82
R16_20_Cat10_T313	O=C(C1CC1)/C=C/C2=CC=C(OC)C=C2	N[C@@H](C1=CC=CC=C1)[C@@H](N(S(=O)(C2=CC=C(C(F)(F)F)C=C2)=O)[Ru]Cl)C3=CC=CC=C3.CC(C)C4=CC=C(C)C=C4	313	20	0.17	27.57	73
R16_21_Cat10_T313	O=C(C1CC1)/C=C/C2=CC(OC)=C(OC)C=C2	N[C@@H](C1=CC=CC=C1)[C@@H](N(S(=O)(C2=CC=C(C(F)(F)F)C=C2)=O)[Ru]Cl)C3=CC=CC=C3.CC(C)C4=CC=C(C)C=C4	313	20	0.17	27.57	74
R16_22_Cat10_T313	O=C(C1CC1)/C=C/C2=CC(Br)=C(OC)C=C2	N[C@@H](C1=CC=CC=C1)[C@@H](N(S(=O)(C2=CC=C(C(F)(F)F)C=C2)=O)[Ru]Cl)C3=CC=CC=C3.CC(C)C4=CC=C(C)C=C4	313	20	0.17	27.57	78
R16_23_Cat10_T313	O=C(C1CC1)/C=C/C2=CC([N+]([O-])=O)=CC=C2Cl	N[C@@H](C1=CC=CC=C1)[C@@H](N(S(=O)(C2=CC=C(C(F)(F)F)C=C2)=O)[Ru]Cl)C3=CC=CC=C3.CC(C)C4=CC=C(C)C=C4	313	20	0.17	27.57	87
R16_24_Cat10_T313	O=C(C1CC1)/C=C/C2=CC(C=CC=C3)=C3C=C2	N[C@@H](C1=CC=CC=C1)[C@@H](N(S(=O)(C2=CC=C(C(F)(F)F)C=C2)=O)[Ru]Cl)C3=CC=CC=C3.CC(C)C4=CC=C(C)C=C4	313	20	0.17	27.57	82
R16_25_Cat10_T313	O=C(C1CC1)/C=C/C2=CC=CO2	N[C@@H](C1=CC=CC=C1)[C@@H](N(S(=O)(C2=CC=C(C(F)(F)F)C=C2)=O)[Ru]Cl)C3=CC=CC=C3.CC(C)C4=CC=C(C)C=C4	313	20	0.17	27.57	85
R16_26_Cat10_T313	O=C(C1CC1)/C=C/CCC2=CC=CC=C2	N[C@@H](C1=CC=CC=C1)[C@@H](N(S(=O)(C2=CC=C(C(F)(F)F)C=C2)=O)[Ru]Cl)C3=CC=CC=C3.CC(C)C4=CC=C(C)C=C4	313	20	0.17	27.57	83
R16_01_Cat06_T313_02	O=C(C1CC1)/C=C/C2=CC=CC=C2	Cl[Ru]N([C@H]([C@H](C1=CC=CC=C1)N([H])CCOCC2=CC=C(C)C=C2)C3=CC=CC=C3)S(C4=CC=C(C)C=C4)(=O)=O	313	20	0.17	27.57	60
R16_01_Cat04_T313_03	O=C(C1CC1)/C=C/C2=CC=CC=C2	N[C@@H](C1=CC=CC=C1)[C@@H](N([Ru]Cl)S(C2=CC=C(C)C=C2)(=O)=O)C3=CC=CC=C3.CC(C)C4=CC=C(C)C=C4	313	20	0.17	27.57	61
R16_01_Cat15_T313_04	O=C(C1CC1)/C=C/C2=CC=CC=C2	N[C@@H](C1=CC=CC=C1)[C@@H](N(S(=O)(C2=CC=C(OC(F)(F)F)C=C2)=O)[Ru]Cl)C3=CC=CC=C3.CC(C)C4=CC=C(C)C=C4	313	20	0.17	27.57	79
R16_01_Cat16_T313_05	O=C(C1CC1)/C=C/C2=CC=CC=C2	N[C@@H](C1=CC=CC=C1)[C@@H](N(S(=O)(C2=CC=C([N+]([O-])=O)C=C2)=O)[Ru]Cl)C3=CC=CC=C3.CC(C)C4=CC=C(C)C=C4	313	20	0.17	27.57	77
R16_01_Cat17_T313_06	O=C(C1CC1)/C=C/C2=CC=CC=C2	N[C@@H](C1=CC=CC=C1)[C@@H](N(S(=O)(C2=C(F)C(F)=C(F)C(F)=C2F)=O)[Ru]Cl)C3=CC=CC=C3.CC(C)C4=CC=C(C)C=C4	313	20	0.17	27.57	79
R16_01_Cat18_T313_07	O=C(C1CC1)/C=C/C2=CC=CC=C2	N[C@@H](C1=CC=CC=C1)[C@@H](N(S(=O)(C2=CC(C(F)(F)F)=CC(C(F)(F)F)=C2)=O)[Ru]Cl)C3=CC=CC=C3.CC(C)C4=CC=C(C)C=C4	313	20	0.17	27.57	77
R16_01_Cat19_T313_08	O=C(C1CC1)/C=C/C2=CC=CC=C2	N[C@@H](C1=CC=CC=C1)[C@@H](N(S(=O)(C2=CC(F)=C(F)C(F)=C2)=O)[Ru]Cl)C3=CC=CC=C3.CC(C)C4=CC=C(C)C=C4	313	20	0.17	27.57	73
R17_01_Cat08_T298	O=C(C1OCCO1)/C=C(NC(C)=O)/C2=CC=CC=C2	Cl[Rh]N([C@H]([C@H](C1=CC=CC=C1)N([H])CC(C=C(OC)C=C2)=C2C3C(C)=C(C)C(C)=C3C)C4=CC=CC=C4)S(C5=CC=C(C)C=C5)(=O)=O	298	100	0.17	27.57	77
R17_02_Cat08_T298	O=C(C1OCCO1)/C=C(NC(C)=O)/C2=CC=C(C)C=C2	Cl[Rh]N([C@H]([C@H](C1=CC=CC=C1)N([H])CC(C=C(OC)C=C2)=C2C3C(C)=C(C)C(C)=C3C)C4=CC=CC=C4)S(C5=CC=C(C)C=C5)(=O)=O	298	100	0.17	27.57	76
R17_04_Cat08_T298	O=C(C(OCC)OCC)/C=C(NC(C)=O)/C1=CC=CC=C1	Cl[Rh]N([C@H]([C@H](C1=CC=CC=C1)N([H])CC(C=C(OC)C=C2)=C2C3C(C)=C(C)C(C)=C3C)C4=CC=CC=C4)S(C5=CC=C(C)C=C5)(=O)=O	298	100	0.17	27.57	96
R17_05_Cat08_T298	O=C(C(OCC)OCC)/C=C(NC(C)=O)/C1=CC=C(C)C=C1	Cl[Rh]N([C@H]([C@H](C1=CC=CC=C1)N([H])CC(C=C(OC)C=C2)=C2C3C(C)=C(C)C(C)=C3C)C4=CC=CC=C4)S(C5=CC=C(C)C=C5)(=O)=O	298	100	0.17	27.57	97
R17_06_Cat08_T298	O=C(C(OCC)OCC)/C=C(NC(C)=O)/C1=CC=C(Br)C=C1	Cl[Rh]N([C@H]([C@H](C1=CC=CC=C1)N([H])CC(C=C(OC)C=C2)=C2C3C(C)=C(C)C(C)=C3C)C4=CC=CC=C4)S(C5=CC=C(C)C=C5)(=O)=O	298	100	0.17	27.57	97
R17_07_Cat08_T298	O=C(C1OCCCO1)/C=C(NC(C)=O)/C2=CC=CC=C2	Cl[Rh]N([C@H]([C@H](C1=CC=CC=C1)N([H])CC(C=C(OC)C=C2)=C2C3C(C)=C(C)C(C)=C3C)C4=CC=CC=C4)S(C5=CC=C(C)C=C5)(=O)=O	298	100	0.17	27.57	99
R17_08_Cat08_T298	O=C(C1OCCCO1)/C=C(NC(C)=O)/C2=CC=C(C)C=C2	Cl[Rh]N([C@H]([C@H](C1=CC=CC=C1)N([H])CC(C=C(OC)C=C2)=C2C3C(C)=C(C)C(C)=C3C)C4=CC=CC=C4)S(C5=CC=C(C)C=C5)(=O)=O	298	100	0.17	27.57	96
R17_09_Cat08_T298	O=C(C1OCCCO1)/C=C(NC(C)=O)/C2=CC=C(Br)C=C2	Cl[Rh]N([C@H]([C@H](C1=CC=CC=C1)N([H])CC(C=C(OC)C=C2)=C2C3C(C)=C(C)C(C)=C3C)C4=CC=CC=C4)S(C5=CC=C(C)C=C5)(=O)=O	298	100	0.17	27.57	97
R17_10_Cat08_T298	O=C(C1OCCCO1)/C=C(NC(C)=O)/C2=CC=C(OC)C=C2	Cl[Rh]N([C@H]([C@H](C1=CC=CC=C1)N([H])CC(C=C(OC)C=C2)=C2C3C(C)=C(C)C(C)=C3C)C4=CC=CC=C4)S(C5=CC=C(C)C=C5)(=O)=O	298	100	0.17	27.57	98
R17_11_Cat08_T298	O=C(C1OCCCO1)/C=C(NC(C)=O)/C2=CC(OC)=CC=C2	Cl[Rh]N([C@H]([C@H](C1=CC=CC=C1)N([H])CC(C=C(OC)C=C2)=C2C3C(C)=C(C)C(C)=C3C)C4=CC=CC=C4)S(C5=CC=C(C)C=C5)(=O)=O	298	100	0.17	27.57	99
R17_12_Cat08_T298	O=C(C1OCCCO1)/C=C(NC(C)=O)/C2=CC=CC=C2OC	Cl[Rh]N([C@H]([C@H](C1=CC=CC=C1)N([H])CC(C=C(OC)C=C2)=C2C3C(C)=C(C)C(C)=C3C)C4=CC=CC=C4)S(C5=CC=C(C)C=C5)(=O)=O	298	100	0.17	27.57	99
R17_13_Cat08_T298	O=C(C1OCCCO1)/C=C(NC(C)=O)/C2=CC(OCO3)=C3C=C2	Cl[Rh]N([C@H]([C@H](C1=CC=CC=C1)N([H])CC(C=C(OC)C=C2)=C2C3C(C)=C(C)C(C)=C3C)C4=CC=CC=C4)S(C5=CC=C(C)C=C5)(=O)=O	298	100	0.17	27.57	98
R17_14_Cat08_T298	O=C(C1OCCCO1)/C=C(NC(C)=O)/C2=CC=C(C)C=C2	Cl[Rh]N([C@H]([C@H](C1=CC=CC=C1)N([H])CC(C=C(OC)C=C2)=C2C3C(C)=C(C)C(C)=C3C)C4=CC=CC=C4)S(C5=CC=C(C)C=C5)(=O)=O	298	100	0.17	27.57	96
R17_15_Cat08_T298	O=C(C1OCCCO1)/C=C(NC(C)=O)/C2=CC(C)=CC=C2	Cl[Rh]N([C@H]([C@H](C1=CC=CC=C1)N([H])CC(C=C(OC)C=C2)=C2C3C(C)=C(C)C(C)=C3C)C4=CC=CC=C4)S(C5=CC=C(C)C=C5)(=O)=O	298	100	0.17	27.57	98
R17_16_Cat08_T298	O=C(C1OCCCO1)/C=C(NC(C)=O)/C2=CC=CC=C2C	Cl[Rh]N([C@H]([C@H](C1=CC=CC=C1)N([H])CC(C=C(OC)C=C2)=C2C3C(C)=C(C)C(C)=C3C)C4=CC=CC=C4)S(C5=CC=C(C)C=C5)(=O)=O	298	100	0.17	27.57	95
R17_17_Cat08_T298	O=C(C1OCCCO1)/C=C(NC(C)=O)/C2=CC(C=CC=C3)=C3C=C2	Cl[Rh]N([C@H]([C@H](C1=CC=CC=C1)N([H])CC(C=C(OC)C=C2)=C2C3C(C)=C(C)C(C)=C3C)C4=CC=CC=C4)S(C5=CC=C(C)C=C5)(=O)=O	298	100	0.17	27.57	98
R17_18_Cat08_T298	O=C(C1OCCCO1)/C=C(NC(C)=O)/C2=CC=C(F)C=C2	Cl[Rh]N([C@H]([C@H](C1=CC=CC=C1)N([H])CC(C=C(OC)C=C2)=C2C3C(C)=C(C)C(C)=C3C)C4=CC=CC=C4)S(C5=CC=C(C)C=C5)(=O)=O	298	100	0.17	27.57	96
R17_19_Cat08_T298	O=C(C1OCCCO1)/C=C(NC(C)=O)/C2=CC=C(Br)C=C2	Cl[Rh]N([C@H]([C@H](C1=CC=CC=C1)N([H])CC(C=C(OC)C=C2)=C2C3C(C)=C(C)C(C)=C3C)C4=CC=CC=C4)S(C5=CC=C(C)C=C5)(=O)=O	298	100	0.17	27.57	97
R17_20_Cat08_T298	O=C(C1OCCCO1)/C=C(NC(C)=O)/C2=CC(F)=C(Cl)C=C2	Cl[Rh]N([C@H]([C@H](C1=CC=CC=C1)N([H])CC(C=C(OC)C=C2)=C2C3C(C)=C(C)C(C)=C3C)C4=CC=CC=C4)S(C5=CC=C(C)C=C5)(=O)=O	298	100	0.17	27.57	94
R17_21_Cat08_T298	O=C(C1OCCCO1)/C=C(NC(C)=O)/C2=CC=C(C(F)(F)F)C=C2	Cl[Rh]N([C@H]([C@H](C1=CC=CC=C1)N([H])CC(C=C(OC)C=C2)=C2C3C(C)=C(C)C(C)=C3C)C4=CC=CC=C4)S(C5=CC=C(C)C=C5)(=O)=O	298	100	0.17	27.57	94
R17_22_Cat08_T298	O=C(C1OCCCO1)/C=C(NC(C)=O)/C2=CC=C([N+]([O-])=O)C=C2	Cl[Rh]N([C@H]([C@H](C1=CC=CC=C1)N([H])CC(C=C(OC)C=C2)=C2C3C(C)=C(C)C(C)=C3C)C4=CC=CC=C4)S(C5=CC=C(C)C=C5)(=O)=O	298	100	0.17	27.57	88
R17_23_Cat08_T298	O=C(C1OCCCO1)/C=C(NC(C)=O)/C2=CC=CS2	Cl[Rh]N([C@H]([C@H](C1=CC=CC=C1)N([H])CC(C=C(OC)C=C2)=C2C3C(C)=C(C)C(C)=C3C)C4=CC=CC=C4)S(C5=CC=C(C)C=C5)(=O)=O	298	100	0.17	27.57	99
R17_24_Cat08_T298	O=C(C1OCCCO1)/C=C(NC(C)=O)/C2=CC=C(Cl)O2	Cl[Rh]N([C@H]([C@H](C1=CC=CC=C1)N([H])CC(C=C(OC)C=C2)=C2C3C(C)=C(C)C(C)=C3C)C4=CC=CC=C4)S(C5=CC=C(C)C=C5)(=O)=O	298	100	0.17	27.57	98
R18_01_Cat11_T293	CC1=NCCC2=CC(OC)=C(OC)C=C21	N[C@@H](C1=CC=CC=C1)[C@@H](N([Rh]Cl)S(C2=CC=C(C)C=C2)(=O)=O)C3=CC=CC=C3.CC4=C(C)C(C)C(C)=C4C	293	200	0.17	27.57	90
R18_02_Cat11_T293	COC1=C(OC)C=C(C(CC)=NCC2)C2=C1	N[C@@H](C1=CC=CC=C1)[C@@H](N([Rh]Cl)S(C2=CC=C(C)C=C2)(=O)=O)C3=CC=CC=C3.CC4=C(C)C(C)C(C)=C4C	293	200	0.17	27.57	83
R18_03_Cat11_T293	COC1=C(OC)C=C(C(C(C)C)=NCC2)C2=C1	N[C@@H](C1=CC=CC=C1)[C@@H](N([Rh]Cl)S(C2=CC=C(C)C=C2)(=O)=O)C3=CC=CC=C3.CC4=C(C)C(C)C(C)=C4C	293	200	0.17	27.57	89
R18_04_Cat11_T293	O=S1(C2=CC=CC=C2C(C)=N1)=O	N[C@@H](C1=CC=CC=C1)[C@@H](N([Rh]Cl)S(C2=CC=C(C)C=C2)(=O)=O)C3=CC=CC=C3.CC4=C(C)C(C)C(C)=C4C	293	200	0.17	27.57	68
R18_05_Cat11_T293	O=S1(C2=CC=CC=C2C(CCCC)=N1)=O	N[C@@H](C1=CC=CC=C1)[C@@H](N([Rh]Cl)S(C2=CC=C(C)C=C2)(=O)=O)C3=CC=CC=C3.CC4=C(C)C(C)C(C)=C4C	293	200	0.17	27.57	67
R18_07_Cat11_T293	O=S1(C2=CC=CC=C2C(C3=CC(Cl)=CC=C3)=N1)=O	N[C@@H](C1=CC=CC=C1)[C@@H](N([Rh]Cl)S(C2=CC=C(C)C=C2)(=O)=O)C3=CC=CC=C3.CC4=C(C)C(C)C(C)=C4C	293	200	0.17	27.57	81
R19_01_Cat09_T298	ClC(C=C1)=CC=C1C2=NCCC3=CC=CC=C32	[H][Ru]N([C@H]([C@H](C1=CC=CC=C1)N([H])CC2=CC=CO2)C3=CC=CC=C3)S(C4=CC=C(C)C=C4)(=O)=O.C5=CC=CC=C5	298	100	0.17	27.57	88
R19_02_Cat09_T298	ClC1=CC(C2=NCCC3=CC=CC=C32)=CC=C1	[H][Ru]N([C@H]([C@H](C1=CC=CC=C1)N([H])CC2=CC=CO2)C3=CC=CC=C3)S(C4=CC=C(C)C=C4)(=O)=O.C5=CC=CC=C5	298	100	0.17	27.57	91
R19_03_Cat09_T298	BrC(C=C1)=CC=C1C2=NCCC3=CC=CC=C32	[H][Ru]N([C@H]([C@H](C1=CC=CC=C1)N([H])CC2=CC=CO2)C3=CC=CC=C3)S(C4=CC=C(C)C=C4)(=O)=O.C5=CC=CC=C5	298	100	0.17	27.57	93
R19_04_Cat09_T298	CC(C=C1)=CC=C1C2=NCCC3=CC=CC=C32	[H][Ru]N([C@H]([C@H](C1=CC=CC=C1)N([H])CC2=CC=CO2)C3=CC=CC=C3)S(C4=CC=C(C)C=C4)(=O)=O.C5=CC=CC=C5	298	100	0.17	27.57	90
R19_05_Cat09_T298	CC1=CC(C2=NCCC3=CC=CC=C32)=CC=C1	[H][Ru]N([C@H]([C@H](C1=CC=CC=C1)N([H])CC2=CC=CO2)C3=CC=CC=C3)S(C4=CC=C(C)C=C4)(=O)=O.C5=CC=CC=C5	298	100	0.17	27.57	92
R19_06_Cat09_T298	COC(C=C1)=CC=C1C2=NCCC3=CC=CC=C32	[H][Ru]N([C@H]([C@H](C1=CC=CC=C1)N([H])CC2=CC=CO2)C3=CC=CC=C3)S(C4=CC=C(C)C=C4)(=O)=O.C5=CC=CC=C5	298	100	0.17	27.57	92
R19_07_Cat09_T298	COC1=CC=CC=C1C2=NCCC3=CC=CC=C32	[H][Ru]N([C@H]([C@H](C1=CC=CC=C1)N([H])CC2=CC=CO2)C3=CC=CC=C3)S(C4=CC=C(C)C=C4)(=O)=O.C5=CC=CC=C5	298	100	0.17	27.57	90
R19_08_Cat09_T298	O=[N+](C(C=C1)=CC=C1C2=NCCC3=CC=CC=C32)[O-]	[H][Ru]N([C@H]([C@H](C1=CC=CC=C1)N([H])CC2=CC=CO2)C3=CC=CC=C3)S(C4=CC=C(C)C=C4)(=O)=O.C5=CC=CC=C5	298	100	0.17	27.57	89
R19_09_Cat09_T298	FC(C(C=C1)=CC=C1C2=NCCC3=CC=CC=C32)(F)F	[H][Ru]N([C@H]([C@H](C1=CC=CC=C1)N([H])CC2=CC=CO2)C3=CC=CC=C3)S(C4=CC=C(C)C=C4)(=O)=O.C5=CC=CC=C5	298	100	0.17	27.57	91
R19_10_Cat09_T298	COC(C(OC)=C1)=CC=C1C2=NCCC3=CC=CC=C32	[H][Ru]N([C@H]([C@H](C1=CC=CC=C1)N([H])CC2=CC=CO2)C3=CC=CC=C3)S(C4=CC=C(C)C=C4)(=O)=O.C5=CC=CC=C5	298	100	0.17	27.57	91
R19_11_Cat09_T298	C12=CC=CC=C1CCN=C2C3=CC(OCO4)=C4C=C3	[H][Ru]N([C@H]([C@H](C1=CC=CC=C1)N([H])CC2=CC=CO2)C3=CC=CC=C3)S(C4=CC=C(C)C=C4)(=O)=O.C5=CC=CC=C5	298	100	0.17	27.57	90
R19_12_Cat09_T298	COC1=C(OC)C=C(C(C2=CC=CC=C2)=NCC3)C3=C1	[H][Ru]N([C@H]([C@H](C1=CC=CC=C1)N([H])CC2=CC=CO2)C3=CC=CC=C3)S(C4=CC=C(C)C=C4)(=O)=O.C5=CC=CC=C5	298	100	0.17	27.57	92
R19_13_Cat09_T298	COC1=C(OC)C=C(C(C2=CC=C(Cl)C=C2)=NCC3)C3=C1	[H][Ru]N([C@H]([C@H](C1=CC=CC=C1)N([H])CC2=CC=CO2)C3=CC=CC=C3)S(C4=CC=C(C)C=C4)(=O)=O.C5=CC=CC=C5	298	100	0.17	27.57	97
R19_14_Cat09_T298	COC1=C(OC)C=C(C(C2=CC=C(OC)C(OC)=C2)=NCC3)C3=C1	[H][Ru]N([C@H]([C@H](C1=CC=CC=C1)N([H])CC2=CC=CO2)C3=CC=CC=C3)S(C4=CC=C(C)C=C4)(=O)=O.C5=CC=CC=C5	298	100	0.17	27.57	93
R19_15_Cat09_T298	COC1=C(OC)C=C(C(C)=NCC2)C2=C1	[H][Ru]N([C@H]([C@H](C1=CC=CC=C1)N([H])CC2=CC=CO2)C3=CC=CC=C3)S(C4=CC=C(C)C=C4)(=O)=O.C5=CC=CC=C5	298	100	0.17	27.57	81
R19_16_Cat09_T298	CC1=NCCC2=CC=CC=C21	[H][Ru]N([C@H]([C@H](C1=CC=CC=C1)N([H])CC2=CC=CO2)C3=CC=CC=C3)S(C4=CC=C(C)C=C4)(=O)=O.C5=CC=CC=C5	298	100	0.17	27.57	80
R20_01_Cat12_T323	O=C1C(CC2=CC=C(OC)C=C2)N3CCC1CC3	N[C@@H](C1=CC=CC=C1)[C@@H](N(S(=O)(C2=C(F)C(F)=C(F)C(F)=C2F)=O)[Ru]Cl)C3=CC=CC=C3.CC(C)C4=CC=C(C)C=C4	323	100	-0.14	72.3	99
R20_02_Cat12_T323	O=C1C(CC2=CC=CC(C)=C2)N3CCC1CC3	N[C@@H](C1=CC=CC=C1)[C@@H](N(S(=O)(C2=C(F)C(F)=C(F)C(F)=C2F)=O)[Ru]Cl)C3=CC=CC=C3.CC(C)C4=CC=C(C)C=C4	323	100	-0.14	72.3	99
R20_03_Cat12_T323	O=C1C(CC2=CC=C(C)C(C)=C2)N3CCC1CC3	N[C@@H](C1=CC=CC=C1)[C@@H](N(S(=O)(C2=C(F)C(F)=C(F)C(F)=C2F)=O)[Ru]Cl)C3=CC=CC=C3.CC(C)C4=CC=C(C)C=C4	323	100	-0.14	72.3	99
R20_04_Cat12_T323	O=C1C(CC2=CC=CC(NC(C)=O)=C2)N3CCC1CC3	N[C@@H](C1=CC=CC=C1)[C@@H](N(S(=O)(C2=C(F)C(F)=C(F)C(F)=C2F)=O)[Ru]Cl)C3=CC=CC=C3.CC(C)C4=CC=C(C)C=C4	323	100	-0.14	72.3	99
R20_05_Cat12_T323	O=C1C(CC2=CC=CC=C2O)N3CCC1CC3	N[C@@H](C1=CC=CC=C1)[C@@H](N(S(=O)(C2=C(F)C(F)=C(F)C(F)=C2F)=O)[Ru]Cl)C3=CC=CC=C3.CC(C)C4=CC=C(C)C=C4	323	100	-0.14	72.3	99
R20_06_Cat12_T323	O=C1C(CC2=CC=CC=C2F)N3CCC1CC3	N[C@@H](C1=CC=CC=C1)[C@@H](N(S(=O)(C2=C(F)C(F)=C(F)C(F)=C2F)=O)[Ru]Cl)C3=CC=CC=C3.CC(C)C4=CC=C(C)C=C4	323	100	-0.14	72.3	97
R20_07_Cat12_T323	O=C1C(CC2=CC=CC(F)=C2)N3CCC1CC3	N[C@@H](C1=CC=CC=C1)[C@@H](N(S(=O)(C2=C(F)C(F)=C(F)C(F)=C2F)=O)[Ru]Cl)C3=CC=CC=C3.CC(C)C4=CC=C(C)C=C4	323	100	-0.14	72.3	98
R20_08_Cat12_T323	O=C1C(CC2=CC=C(C3=CC=CC=C3)C=C2)N4CCC1CC4	N[C@@H](C1=CC=CC=C1)[C@@H](N(S(=O)(C2=C(F)C(F)=C(F)C(F)=C2F)=O)[Ru]Cl)C3=CC=CC=C3.CC(C)C4=CC=C(C)C=C4	323	100	-0.14	72.3	99
R20_09_Cat12_T323	O=C1C(CC2=CC=C(F)C=C2)N3CCC1CC3	N[C@@H](C1=CC=CC=C1)[C@@H](N(S(=O)(C2=C(F)C(F)=C(F)C(F)=C2F)=O)[Ru]Cl)C3=CC=CC=C3.CC(C)C4=CC=C(C)C=C4	323	100	-0.14	72.3	99
R20_10_Cat12_T323	O=C1C(CC2=CC=C(C(F)(F)F)C=C2)N3CCC1CC3	N[C@@H](C1=CC=CC=C1)[C@@H](N(S(=O)(C2=C(F)C(F)=C(F)C(F)=C2F)=O)[Ru]Cl)C3=CC=CC=C3.CC(C)C4=CC=C(C)C=C4	323	100	-0.14	72.3	98
R20_11_Cat12_T323	O=C1C(CC2=CC(F)=CC=C2F)N3CCC1CC3	N[C@@H](C1=CC=CC=C1)[C@@H](N(S(=O)(C2=C(F)C(F)=C(F)C(F)=C2F)=O)[Ru]Cl)C3=CC=CC=C3.CC(C)C4=CC=C(C)C=C4	323	100	-0.14	72.3	95
R20_12_Cat12_T323	O=C1C(CC2=CC(OC)=CC(OC)=C2)N3CCC1CC3	N[C@@H](C1=CC=CC=C1)[C@@H](N(S(=O)(C2=C(F)C(F)=C(F)C(F)=C2F)=O)[Ru]Cl)C3=CC=CC=C3.CC(C)C4=CC=C(C)C=C4	323	100	-0.14	72.3	99
R20_13_Cat12_T323	O=C1C(CC2=CC=C(OC)C(O)=C2)N3CCC1CC3	N[C@@H](C1=CC=CC=C1)[C@@H](N(S(=O)(C2=C(F)C(F)=C(F)C(F)=C2F)=O)[Ru]Cl)C3=CC=CC=C3.CC(C)C4=CC=C(C)C=C4	323	100	-0.14	72.3	99
R20_14_Cat12_T323	O=C1C(CC2=CC(C(C)(C)C)=CC=C2OC)N3CCC1CC3	N[C@@H](C1=CC=CC=C1)[C@@H](N(S(=O)(C2=C(F)C(F)=C(F)C(F)=C2F)=O)[Ru]Cl)C3=CC=CC=C3.CC(C)C4=CC=C(C)C=C4	323	100	-0.14	72.3	99
R20_15_Cat12_T323	O=C1C(CC2=CC(OCO3)=C3C=C2)N4CCC1CC4	N[C@@H](C1=CC=CC=C1)[C@@H](N(S(=O)(C2=C(F)C(F)=C(F)C(F)=C2F)=O)[Ru]Cl)C3=CC=CC=C3.CC(C)C4=CC=C(C)C=C4	323	100	-0.14	72.3	98
R20_16_Cat12_T323	O=C1C(CC2=CC=CC3=C2C=CC=C3)N4CCC1CC4	N[C@@H](C1=CC=CC=C1)[C@@H](N(S(=O)(C2=C(F)C(F)=C(F)C(F)=C2F)=O)[Ru]Cl)C3=CC=CC=C3.CC(C)C4=CC=C(C)C=C4	323	100	-0.14	72.3	99
R20_17_Cat12_T323	O=C1C(CC2=CC=CO2)N3CCC1CC3	N[C@@H](C1=CC=CC=C1)[C@@H](N(S(=O)(C2=C(F)C(F)=C(F)C(F)=C2F)=O)[Ru]Cl)C3=CC=CC=C3.CC(C)C4=CC=C(C)C=C4	323	100	-0.14	72.3	97
R20_18_Cat12_T323	O=C1C(CC2=CC=C(C)S2)N3CCC1CC3	N[C@@H](C1=CC=CC=C1)[C@@H](N(S(=O)(C2=C(F)C(F)=C(F)C(F)=C2F)=O)[Ru]Cl)C3=CC=CC=C3.CC(C)C4=CC=C(C)C=C4	323	100	-0.14	72.3	99
R21_01_Cat08_T298	O=C(C(C)C#N)C1=CC=CC=C1	Cl[Rh]N([C@H]([C@H](C1=CC=CC=C1)N([H])CC(C=C(OC)C=C2)=C2C3C(C)=C(C)C(C)=C3C)C4=CC=CC=C4)S(C5=CC=C(C)C=C5)(=O)=O	298	100	0.17	27.57	99
R21_02_Cat08_T298	O=C(C(CC)C#N)C1=CC=CC=C1	Cl[Rh]N([C@H]([C@H](C1=CC=CC=C1)N([H])CC(C=C(OC)C=C2)=C2C3C(C)=C(C)C(C)=C3C)C4=CC=CC=C4)S(C5=CC=C(C)C=C5)(=O)=O	298	100	0.17	27.57	99
R21_03_Cat08_T298	O=C(C(C(C)C)C#N)C1=CC=CC=C1	Cl[Rh]N([C@H]([C@H](C1=CC=CC=C1)N([H])CC(C=C(OC)C=C2)=C2C3C(C)=C(C)C(C)=C3C)C4=CC=CC=C4)S(C5=CC=C(C)C=C5)(=O)=O	298	100	0.17	27.57	99
R21_04_Cat08_T298	O=C(C(C(C)(C)C)C#N)C1=CC=CC=C1	Cl[Rh]N([C@H]([C@H](C1=CC=CC=C1)N([H])CC(C=C(OC)C=C2)=C2C3C(C)=C(C)C(C)=C3C)C4=CC=CC=C4)S(C5=CC=C(C)C=C5)(=O)=O	298	100	0.17	27.57	99
R21_05_Cat08_T298	O=C(C(CC1=CC=CC=C1)C#N)C2=CC=CC=C2	Cl[Rh]N([C@H]([C@H](C1=CC=CC=C1)N([H])CC(C=C(OC)C=C2)=C2C3C(C)=C(C)C(C)=C3C)C4=CC=CC=C4)S(C5=CC=C(C)C=C5)(=O)=O	298	100	0.17	27.57	98
R21_06_Cat08_T298	O=C(C(C1=CC=CC=C1)C#N)C2=CC=CC=C2	Cl[Rh]N([C@H]([C@H](C1=CC=CC=C1)N([H])CC(C=C(OC)C=C2)=C2C3C(C)=C(C)C(C)=C3C)C4=CC=CC=C4)S(C5=CC=C(C)C=C5)(=O)=O	298	100	0.17	27.57	99
R21_07_Cat08_T298	O=C(C(C1=CC=C(C=CC=C2)C2=C1)C#N)C3=CC=CC=C3	Cl[Rh]N([C@H]([C@H](C1=CC=CC=C1)N([H])CC(C=C(OC)C=C2)=C2C3C(C)=C(C)C(C)=C3C)C4=CC=CC=C4)S(C5=CC=C(C)C=C5)(=O)=O	298	100	0.17	27.57	99
R21_08_Cat08_T298	O=C(C(C(C)C)C#N)C1=CC=C(F)C=C1	Cl[Rh]N([C@H]([C@H](C1=CC=CC=C1)N([H])CC(C=C(OC)C=C2)=C2C3C(C)=C(C)C(C)=C3C)C4=CC=CC=C4)S(C5=CC=C(C)C=C5)(=O)=O	298	100	0.17	27.57	99
R21_09_Cat08_T298	O=C(C(C(C)C)C#N)C1=CC=C(Cl)C=C1	Cl[Rh]N([C@H]([C@H](C1=CC=CC=C1)N([H])CC(C=C(OC)C=C2)=C2C3C(C)=C(C)C(C)=C3C)C4=CC=CC=C4)S(C5=CC=C(C)C=C5)(=O)=O	298	100	0.17	27.57	99
R21_10_Cat08_T298	O=C(C(C(C)C)C#N)C1=CC=C(Br)C=C1	Cl[Rh]N([C@H]([C@H](C1=CC=CC=C1)N([H])CC(C=C(OC)C=C2)=C2C3C(C)=C(C)C(C)=C3C)C4=CC=CC=C4)S(C5=CC=C(C)C=C5)(=O)=O	298	100	0.17	27.57	99
R21_11_Cat08_T298	O=C(C(C(C)C)C#N)C1=CC=C(C(F)(F)F)C=C1	Cl[Rh]N([C@H]([C@H](C1=CC=CC=C1)N([H])CC(C=C(OC)C=C2)=C2C3C(C)=C(C)C(C)=C3C)C4=CC=CC=C4)S(C5=CC=C(C)C=C5)(=O)=O	298	100	0.17	27.57	99
R21_12_Cat08_T298	O=C(C(C(C)C)C#N)C1=CC=C(C)C=C1	Cl[Rh]N([C@H]([C@H](C1=CC=CC=C1)N([H])CC(C=C(OC)C=C2)=C2C3C(C)=C(C)C(C)=C3C)C4=CC=CC=C4)S(C5=CC=C(C)C=C5)(=O)=O	298	100	0.17	27.57	99
R21_13_Cat08_T298	O=C(C(C(C)C)C#N)C1=CC=C(OC)C=C1	Cl[Rh]N([C@H]([C@H](C1=CC=CC=C1)N([H])CC(C=C(OC)C=C2)=C2C3C(C)=C(C)C(C)=C3C)C4=CC=CC=C4)S(C5=CC=C(C)C=C5)(=O)=O	298	100	0.17	27.57	99
R21_14_Cat08_T298	O=C(C(C(C)C)C#N)C1=CC(OC)=CC=C1	Cl[Rh]N([C@H]([C@H](C1=CC=CC=C1)N([H])CC(C=C(OC)C=C2)=C2C3C(C)=C(C)C(C)=C3C)C4=CC=CC=C4)S(C5=CC=C(C)C=C5)(=O)=O	298	100	0.17	27.57	99
R21_15_Cat08_T298	O=C(C(C(C)C)C#N)C1=C(F)C=CC=C1	Cl[Rh]N([C@H]([C@H](C1=CC=CC=C1)N([H])CC(C=C(OC)C=C2)=C2C3C(C)=C(C)C(C)=C3C)C4=CC=CC=C4)S(C5=CC=C(C)C=C5)(=O)=O	298	100	0.17	27.57	99
R21_16_Cat08_T298	O=C(C(C(C)C)C#N)C1=CC(OC)=C(OC)C=C1	Cl[Rh]N([C@H]([C@H](C1=CC=CC=C1)N([H])CC(C=C(OC)C=C2)=C2C3C(C)=C(C)C(C)=C3C)C4=CC=CC=C4)S(C5=CC=C(C)C=C5)(=O)=O	298	100	0.17	27.57	99
R21_17_Cat08_T298	O=C(C(C(C)C)C#N)C1=CC(C=CC=C2)=C2C=C1	Cl[Rh]N([C@H]([C@H](C1=CC=CC=C1)N([H])CC(C=C(OC)C=C2)=C2C3C(C)=C(C)C(C)=C3C)C4=CC=CC=C4)S(C5=CC=C(C)C=C5)(=O)=O	298	100	0.17	27.57	99
R21_18_Cat08_T298	O=C(C(C(C)C)C#N)C1=CC=CS1	Cl[Rh]N([C@H]([C@H](C1=CC=CC=C1)N([H])CC(C=C(OC)C=C2)=C2C3C(C)=C(C)C(C)=C3C)C4=CC=CC=C4)S(C5=CC=C(C)C=C5)(=O)=O	298	100	0.17	27.57	99
R21_19_Cat08_T298	O=C(C(C(C)C)C#N)C1=CC=CO1	Cl[Rh]N([C@H]([C@H](C1=CC=CC=C1)N([H])CC(C=C(OC)C=C2)=C2C3C(C)=C(C)C(C)=C3C)C4=CC=CC=C4)S(C5=CC=C(C)C=C5)(=O)=O	298	100	0.17	27.57	99
R21_20_Cat08_T298	O=C(C(C(C)C)C#N)C1=CC=CC=N1	Cl[Rh]N([C@H]([C@H](C1=CC=CC=C1)N([H])CC(C=C(OC)C=C2)=C2C3C(C)=C(C)C(C)=C3C)C4=CC=CC=C4)S(C5=CC=C(C)C=C5)(=O)=O	298	100	0.17	27.57	99
R21_21_Cat08_T298	O=C(C(C(C)C)C#N)C1=CC2=C(C=CC=C2)N1C	Cl[Rh]N([C@H]([C@H](C1=CC=CC=C1)N([H])CC(C=C(OC)C=C2)=C2C3C(C)=C(C)C(C)=C3C)C4=CC=CC=C4)S(C5=CC=C(C)C=C5)(=O)=O	298	100	0.17	27.57	99
R21_22_Cat08_T298	O=C1C(C#N)CCC2=CC=CC=C21	Cl[Rh]N([C@H]([C@H](C1=CC=CC=C1)N([H])CC(C=C(OC)C=C2)=C2C3C(C)=C(C)C(C)=C3C)C4=CC=CC=C4)S(C5=CC=C(C)C=C5)(=O)=O	298	100	0.17	27.57	99
R21_23_Cat08_T298	O=C1C(C#N)CCCC2=CC=CC=C21	Cl[Rh]N([C@H]([C@H](C1=CC=CC=C1)N([H])CC(C=C(OC)C=C2)=C2C3C(C)=C(C)C(C)=C3C)C4=CC=CC=C4)S(C5=CC=C(C)C=C5)(=O)=O	298	100	0.17	27.57	99
R21_24_Cat08_T298	CC(C(C1=CC=CC=C1)C#N)=O	Cl[Rh]N([C@H]([C@H](C1=CC=CC=C1)N([H])CC(C=C(OC)C=C2)=C2C3C(C)=C(C)C(C)=C3C)C4=CC=CC=C4)S(C5=CC=C(C)C=C5)(=O)=O	298	100	0.17	27.57	99
R21_01_Cat04_T298_01	O=C(C(C)C#N)C1=CC=CC=C1	N[C@@H](C1=CC=CC=C1)[C@@H](N([Ru]Cl)S(C2=CC=C(C)C=C2)(=O)=O)C3=CC=CC=C3.CC(C)C4=CC=C(C)C=C4	298	100	0.17	27.57	77
R22_01_Cat13_T313	CC(C1=C(O)C=CC2=C1C=CC=C2)=O	N[C@@H](C1=CC=CC=C1)[C@@H](N(S(=O)(N(CCC2=CC=C(C)C=C2)C)=O)[Ru]Cl)C3=CC=CC=C3	313	1000	0.17	27.57	97.2
R22_01_Cat13_T333	CC(C1=C(O)C=CC2=C1C=CC=C2)=O	N[C@@H](C1=CC=CC=C1)[C@@H](N(S(=O)(N(CCC2=CC=C(C)C=C2)C)=O)[Ru]Cl)C3=CC=CC=C3	333	1000	0.17	27.57	95
R22_03_Cat13_T313	CC(C1=CC=C(F)C2=C1C=CC=C2)=O	N[C@@H](C1=CC=CC=C1)[C@@H](N(S(=O)(N(CCC2=CC=C(C)C=C2)C)=O)[Ru]Cl)C3=CC=CC=C3	313	1000	0.17	27.57	97.8
R22_03_Cat13_T333	CC(C1=CC=C(F)C2=C1C=CC=C2)=O	N[C@@H](C1=CC=CC=C1)[C@@H](N(S(=O)(N(CCC2=CC=C(C)C=C2)C)=O)[Ru]Cl)C3=CC=CC=C3	333	1000	0.17	27.57	97.2
R22_04_Cat13_T333	CC(C1=CC=C(C)C2=C1C=CC=C2)=O	N[C@@H](C1=CC=CC=C1)[C@@H](N(S(=O)(N(CCC2=CC=C(C)C=C2)C)=O)[Ru]Cl)C3=CC=CC=C3	333	1000	0.17	27.57	98.4
R22_05_Cat13_T333	CC(C1=CC=C(OC)C2=C1C=CC=C2)=O	N[C@@H](C1=CC=CC=C1)[C@@H](N(S(=O)(N(CCC2=CC=C(C)C=C2)C)=O)[Ru]Cl)C3=CC=CC=C3	333	200	0.17	27.57	92.3
R22_06_Cat13_T333	CC(C1=CC=CC2=C1C=CC(OC)=C2)=O	N[C@@H](C1=CC=CC=C1)[C@@H](N(S(=O)(N(CCC2=CC=C(C)C=C2)C)=O)[Ru]Cl)C3=CC=CC=C3	333	1000	0.17	27.57	97.6
R22_08_Cat13_T313	CC(C1=CC(C=CC=C2)=C2C3=C1C=CC=C3)=O	N[C@@H](C1=CC=CC=C1)[C@@H](N(S(=O)(N(CCC2=CC=C(C)C=C2)C)=O)[Ru]Cl)C3=CC=CC=C3	313	1000	0.17	27.57	99.9
R22_08_Cat13_T333	CC(C1=CC(C=CC=C2)=C2C3=C1C=CC=C3)=O	N[C@@H](C1=CC=CC=C1)[C@@H](N(S(=O)(N(CCC2=CC=C(C)C=C2)C)=O)[Ru]Cl)C3=CC=CC=C3	333	1000	0.17	27.57	98.1
R22_09_Cat13_T333	O=C(CC)C1=CC=CC2=C1C=CC=C2	N[C@@H](C1=CC=CC=C1)[C@@H](N(S(=O)(N(CCC2=CC=C(C)C=C2)C)=O)[Ru]Cl)C3=CC=CC=C3	333	1000	0.17	27.57	97.8
R22_10_Cat13_T333	O=C(C(C)(C)C)C1=CC=CC2=C1C=CC=C2	N[C@@H](C1=CC=CC=C1)[C@@H](N(S(=O)(N(CCC2=CC=C(C)C=C2)C)=O)[Ru]Cl)C3=CC=CC=C3	333	100	0.17	27.57	97
R22_11_Cat13_T313	O=C(CC1=CC=CC=C1)C2=CC=CC3=C2C=CC=C3	N[C@@H](C1=CC=CC=C1)[C@@H](N(S(=O)(N(CCC2=CC=C(C)C=C2)C)=O)[Ru]Cl)C3=CC=CC=C3	313	1000	0.17	27.57	99
R22_11_Cat13_T333	O=C(CC1=CC=CC=C1)C2=CC=CC3=C2C=CC=C3	N[C@@H](C1=CC=CC=C1)[C@@H](N(S(=O)(N(CCC2=CC=C(C)C=C2)C)=O)[Ru]Cl)C3=CC=CC=C3	333	1000	0.17	27.57	98.5
R22_12_Cat13_T313	CC(C=CC=C1)=C1C(C(CC(OC)=O)=O)=C	N[C@@H](C1=CC=CC=C1)[C@@H](N(S(=O)(N(CCC2=CC=C(C)C=C2)C)=O)[Ru]Cl)C3=CC=CC=C3	313	1000	0.17	27.57	98.2
R22_12_Cat13_T333	CC(C=CC=C1)=C1C(C(CC(OC)=O)=O)=C	N[C@@H](C1=CC=CC=C1)[C@@H](N(S(=O)(N(CCC2=CC=C(C)C=C2)C)=O)[Ru]Cl)C3=CC=CC=C3	333	1000	0.17	27.57	98.1

## Sheet: SMILES_Dataset
Reactions_Number	S_SMILES	C_SMILES	Temperature	S_C	H_logP	H_TPSA	Ee
R11_11_Cat05_T298	O=C(COC1=CC=CC=C1)COC2=CC=C(NC(OC(C)(C)C)=O)C=C2	Cl[Ru]N([C@H]([C@H](C1=CC=CC=C1)N([H])CCCC2=CC=CC=C2)C3=CC=CC=C3)S(C4=CC=C(C)C=C4)(=O)=O	298	200	0.17	27.57	0
R11_21_Cat05_T298	O=C(COC1=CC=CC=C1)COC2=C(N(C)C)C=CC=C2	Cl[Ru]N([C@H]([C@H](C1=CC=CC=C1)N([H])CCCC2=CC=CC=C2)C3=CC=CC=C3)S(C4=CC=C(C)C=C4)(=O)=O	298	200	0.17	27.57	0
R11_09_Cat05_T298	O=C(COC1=CC=CC=C1)COC2=CC=C(Cl)C=C2	Cl[Ru]N([C@H]([C@H](C1=CC=CC=C1)N([H])CCCC2=CC=CC=C2)C3=CC=CC=C3)S(C4=CC=C(C)C=C4)(=O)=O	298	200	0.17	27.57	6
R11_08_Cat05_T298	O=C(COC1=CC=C(OC)C=C1)COC2=CC=CC=C2	Cl[Ru]N([C@H]([C@H](C1=CC=CC=C1)N([H])CCCC2=CC=CC=C2)C3=CC=CC=C3)S(C4=CC=C(C)C=C4)(=O)=O	298	200	0.17	27.57	7
R11_10_Cat05_T298	O=C(COC1=CC=C(OC)C=C1)COC2=CC=C(Cl)C=C2	Cl[Ru]N([C@H]([C@H](C1=CC=CC=C1)N([H])CCCC2=CC=CC=C2)C3=CC=CC=C3)S(C4=CC=C(C)C=C4)(=O)=O	298	200	0.17	27.57	12
R11_12_Cat05_T298	O=C(COC(C)C)COC1=C(OC)C=CC=C1OC	Cl[Ru]N([C@H]([C@H](C1=CC=CC=C1)N([H])CCCC2=CC=CC=C2)C3=CC=CC=C3)S(C4=CC=C(C)C=C4)(=O)=O	298	200	0.17	27.57	16
R11_19_Cat05_T298	O=C(COC(C)C)COC1=C(Cl)C=CC=C1	Cl[Ru]N([C@H]([C@H](C1=CC=CC=C1)N([H])CCCC2=CC=CC=C2)C3=CC=CC=C3)S(C4=CC=C(C)C=C4)(=O)=O	298	200	0.17	27.57	21
R10_04_Cat05_T300	O=C(C(NC1=CC=CC=C1)=O)C2=CC=C(C)C=C2	Cl[Ru]N([C@H]([C@H](C1=CC=CC=C1)N([H])CCCC2=CC=CC=C2)C3=CC=CC=C3)S(C4=CC=C(C)C=C4)(=O)=O	300	100	0.17	27.57	24.6
R15_01_Cat06_T273_03	O=C(C(NC(C1=CC=CC=C1)=O)C(OC)=O)C2=CC=CC=C2	Cl[Ru]N([C@H]([C@H](C1=CC=CC=C1)N([H])CCOCC2=CC=C(C)C=C2)C3=CC=CC=C3)S(C4=CC=C(C)C=C4)(=O)=O	273	200	0.17	27.57	25
R11_04_Cat05_T298	O=C(COC(C)C)COC1=CC=C(OC)C=C1	Cl[Ru]N([C@H]([C@H](C1=CC=CC=C1)N([H])CCCC2=CC=CC=C2)C3=CC=CC=C3)S(C4=CC=C(C)C=C4)(=O)=O	298	200	0.17	27.57	27
R11_22_Cat05_T298	O=C(COC1=CC=CC=C1)COC2=C(F)C(F)=C(F)C(F)=C2F	Cl[Ru]N([C@H]([C@H](C1=CC=CC=C1)N([H])CCCC2=CC=CC=C2)C3=CC=CC=C3)S(C4=CC=C(C)C=C4)(=O)=O	298	200	0.17	27.57	27
R11_23_Cat05_T298	O=C(COC1=CC=CC=C1)COC2=CC=C(C(F)(F)F)C=C2	Cl[Ru]N([C@H]([C@H](C1=CC=CC=C1)N([H])CCCC2=CC=CC=C2)C3=CC=CC=C3)S(C4=CC=C(C)C=C4)(=O)=O	298	200	0.17	27.57	28
R11_24_Cat05_T298	O=C(COC1=CC=CC=C1)COC2=CC(C(F)(F)F)=CC=C2	Cl[Ru]N([C@H]([C@H](C1=CC=CC=C1)N([H])CCCC2=CC=CC=C2)C3=CC=CC=C3)S(C4=CC=C(C)C=C4)(=O)=O	298	200	0.17	27.57	28
R15_01_Cat14_T273_02	O=C(C(NC(C1=CC=CC=C1)=O)C(OC)=O)C2=CC=CC=C2	N[C@@H](C1=CC=CC=C1)[C@@H](N([Ru]Cl)S(C2=CC=C(C)C=C2)(=O)=O)C3=CC=CC=C3.C4=CC=CC=C4	273	200	0.17	27.57	28
R10_07_Cat05_T300	O=C(C(NC1=CC=C(C)C=C1)=O)C2=C(Cl)C=CC=C2	Cl[Ru]N([C@H]([C@H](C1=CC=CC=C1)N([H])CCCC2=CC=CC=C2)C3=CC=CC=C3)S(C4=CC=C(C)C=C4)(=O)=O	300	100	0.17	27.57	29.5
R11_01_Cat05_T298	COCC(COC1=CC=CC=C1)=O	Cl[Ru]N([C@H]([C@H](C1=CC=CC=C1)N([H])CCCC2=CC=CC=C2)C3=CC=CC=C3)S(C4=CC=C(C)C=C4)(=O)=O	298	200	0.17	27.57	30
R11_07_Cat05_T298	O=C(COCC=C)COC1=CC=C(OC)C=C1	Cl[Ru]N([C@H]([C@H](C1=CC=CC=C1)N([H])CCCC2=CC=CC=C2)C3=CC=CC=C3)S(C4=CC=C(C)C=C4)(=O)=O	298	200	0.17	27.57	31
R11_14_Cat05_T298	O=C(COC1=C(OC)C=CC=C1OC)COC2=CC=C(OC)C=C2	Cl[Ru]N([C@H]([C@H](C1=CC=CC=C1)N([H])CCCC2=CC=CC=C2)C3=CC=CC=C3)S(C4=CC=C(C)C=C4)(=O)=O	298	200	0.17	27.57	33
R10_05_Cat05_T300	O=C(C(NC1=CC=CC=C1)=O)C2=CC=C(OC)C=C2	Cl[Ru]N([C@H]([C@H](C1=CC=CC=C1)N([H])CCCC2=CC=CC=C2)C3=CC=CC=C3)S(C4=CC=C(C)C=C4)(=O)=O	300	100	0.17	27.57	34.9
R15_01_Cat05_T273_04	O=C(C(NC(C1=CC=CC=C1)=O)C(OC)=O)C2=CC=CC=C2	Cl[Ru]N([C@H]([C@H](C1=CC=CC=C1)N([H])CCCC2=CC=CC=C2)C3=CC=CC=C3)S(C4=CC=C(C)C=C4)(=O)=O	273	200	0.17	27.57	36
R11_06_Cat05_T298	O=C(COCC=C)COC1=CC=CC=C1	Cl[Ru]N([C@H]([C@H](C1=CC=CC=C1)N([H])CCCC2=CC=CC=C2)C3=CC=CC=C3)S(C4=CC=C(C)C=C4)(=O)=O	298	200	0.17	27.57	37
R11_03_Cat05_T298	O=C(COC(C)C)COC1=CC=CC=C1	Cl[Ru]N([C@H]([C@H](C1=CC=CC=C1)N([H])CCCC2=CC=CC=C2)C3=CC=CC=C3)S(C4=CC=C(C)C=C4)(=O)=O	298	200	0.17	27.57	39
R11_02_Cat05_T298	O=C(COCCCC)COC1=CC=CC=C1	Cl[Ru]N([C@H]([C@H](C1=CC=CC=C1)N([H])CCCC2=CC=CC=C2)C3=CC=CC=C3)S(C4=CC=C(C)C=C4)(=O)=O	298	200	0.17	27.57	41
R14_16_Cat05_T298	O=C(/C=C/C1=CC=CC=C1)C2(C3)CC3(C2)C4=CC=CC=C4	Cl[Ru]N([C@H]([C@H](C1=CC=CC=C1)N([H])CCCC2=CC=CC=C2)C3=CC=CC=C3)S(C4=CC=C(C)C=C4)(=O)=O	298	100	0.17	27.57	41
R11_13_Cat05_T298	O=C(COC1=C(OC)C=CC=C1OC)COC2=CC=CC=C2	Cl[Ru]N([C@H]([C@H](C1=CC=CC=C1)N([H])CCCC2=CC=CC=C2)C3=CC=CC=C3)S(C4=CC=C(C)C=C4)(=O)=O	298	200	0.17	27.57	42
R10_01_Cat05_T300	O=C(C(NC1=CC=CC=C1)=O)C2=CC=CC=C2	Cl[Ru]N([C@H]([C@H](C1=CC=CC=C1)N([H])CCCC2=CC=CC=C2)C3=CC=CC=C3)S(C4=CC=C(C)C=C4)(=O)=O	300	100	0.17	27.57	43.6
R10_03_Cat05_T300	O=C(C(NC1=CC=CC=C1)=O)C2=CC=C(Cl)C=C2	Cl[Ru]N([C@H]([C@H](C1=CC=CC=C1)N([H])CCCC2=CC=CC=C2)C3=CC=CC=C3)S(C4=CC=C(C)C=C4)(=O)=O	300	100	0.17	27.57	45.4
R11_05_Cat05_T298	O=C(COC(COC)COC)COC1=CC=CC=C1	Cl[Ru]N([C@H]([C@H](C1=CC=CC=C1)N([H])CCCC2=CC=CC=C2)C3=CC=CC=C3)S(C4=CC=C(C)C=C4)(=O)=O	298	200	0.17	27.57	46
R11_16_Cat05_T298	O=C(COC1=CC=CC=C1)COC2=C(NC(OC(C)(C)C)=O)C=CC=C2	Cl[Ru]N([C@H]([C@H](C1=CC=CC=C1)N([H])CCCC2=CC=CC=C2)C3=CC=CC=C3)S(C4=CC=C(C)C=C4)(=O)=O	298	200	0.17	27.57	46
R10_10_Cat05_T300	O=C(C(NC1=CC=C(C)C=C1)=O)C2=C(Cl)C=CC=C2Cl	Cl[Ru]N([C@H]([C@H](C1=CC=CC=C1)N([H])CCCC2=CC=CC=C2)C3=CC=CC=C3)S(C4=CC=C(C)C=C4)(=O)=O	300	100	0.17	27.57	50
R11_25_Cat05_T298	O=C(COC1=CC=CC=C1)COC2=C(C(F)(F)F)C=CC=C2	Cl[Ru]N([C@H]([C@H](C1=CC=CC=C1)N([H])CCCC2=CC=CC=C2)C3=CC=CC=C3)S(C4=CC=C(C)C=C4)(=O)=O	298	200	0.17	27.57	50
R10_02_Cat05_T300	O=C(C(NC1=CC=CC=C1)=O)C2=CC=C(F)C=C2	Cl[Ru]N([C@H]([C@H](C1=CC=CC=C1)N([H])CCCC2=CC=CC=C2)C3=CC=CC=C3)S(C4=CC=C(C)C=C4)(=O)=O	300	100	0.17	27.57	52.04
R11_18_Cat05_T298	O=C(COC1=C(OC)C=CC=C1OC)COC2=C(NC(OC(C)(C)C)=O)C=CC=C2	Cl[Ru]N([C@H]([C@H](C1=CC=CC=C1)N([H])CCCC2=CC=CC=C2)C3=CC=CC=C3)S(C4=CC=C(C)C=C4)(=O)=O	298	200	0.17	27.57	59
R16_01_Cat06_T313_02	O=C(C1CC1)/C=C/C2=CC=CC=C2	Cl[Ru]N([C@H]([C@H](C1=CC=CC=C1)N([H])CCOCC2=CC=C(C)C=C2)C3=CC=CC=C3)S(C4=CC=C(C)C=C4)(=O)=O	313	20	0.17	27.57	60
R16_01_Cat04_T313_03	O=C(C1CC1)/C=C/C2=CC=CC=C2	N[C@@H](C1=CC=CC=C1)[C@@H](N([Ru]Cl)S(C2=CC=C(C)C=C2)(=O)=O)C3=CC=CC=C3.CC(C)C4=CC=C(C)C=C4	313	20	0.17	27.57	61
R11_17_Cat05_T298	O=C(COC1=CC=C(OC)C=C1)COC2=C(NC(OC(C)(C)C)=O)C=CC=C2	Cl[Ru]N([C@H]([C@H](C1=CC=CC=C1)N([H])CCCC2=CC=CC=C2)C3=CC=CC=C3)S(C4=CC=C(C)C=C4)(=O)=O	298	200	0.17	27.57	65
R18_05_Cat11_T293	O=S1(C2=CC=CC=C2C(CCCC)=N1)=O	N[C@@H](C1=CC=CC=C1)[C@@H](N([Rh]Cl)S(C2=CC=C(C)C=C2)(=O)=O)C3=CC=CC=C3.CC4=C(C)C(C)C(C)=C4C	293	200	0.17	27.57	67
R11_15_Cat05_T298	O=C(COC(C)C)COC1=C(NC(OC(C)(C)C)=O)C=CC=C1	Cl[Ru]N([C@H]([C@H](C1=CC=CC=C1)N([H])CCCC2=CC=CC=C2)C3=CC=CC=C3)S(C4=CC=C(C)C=C4)(=O)=O	298	200	0.17	27.57	68
R18_04_Cat11_T293	O=S1(C2=CC=CC=C2C(C)=N1)=O	N[C@@H](C1=CC=CC=C1)[C@@H](N([Rh]Cl)S(C2=CC=C(C)C=C2)(=O)=O)C3=CC=CC=C3.CC4=C(C)C(C)C(C)=C4C	293	200	0.17	27.57	68
R04_02_Cat05_T301	CC(C1CCCCC1)=O	Cl[Ru]N([C@H]([C@H](C1=CC=CC=C1)N([H])CCCC2=CC=CC=C2)C3=CC=CC=C3)S(C4=CC=C(C)C=C4)(=O)=O	301	200	0.17	27.57	69
R03_11_Cat04_T303	O=C(C(Cl)(Cl)C(OCC)=O)C1=CC=CC=C1	N[C@@H](C1=CC=CC=C1)[C@@H](N([Ru]Cl)S(C2=CC=C(C)C=C2)(=O)=O)C3=CC=CC=C3.CC(C)C4=CC=C(C)C=C4	303	100	0.17	27.57	70
R14_06_Cat05_T298	O=C(C1=CC=C(C(F)(F)F)C=C1)C2(C3)CC3(C2)C4=CC=CC=C4	Cl[Ru]N([C@H]([C@H](C1=CC=CC=C1)N([H])CCCC2=CC=CC=C2)C3=CC=CC=C3)S(C4=CC=C(C)C=C4)(=O)=O	298	100	0.17	27.57	70
R16_07_Cat10_T313	O=C(C1CC1)/C=C/C2=C(OCC3=CC=CC=C3)C=CC=C2	N[C@@H](C1=CC=CC=C1)[C@@H](N(S(=O)(C2=CC=C(C(F)(F)F)C=C2)=O)[Ru]Cl)C3=CC=CC=C3.CC(C)C4=CC=C(C)C=C4	313	20	0.17	27.57	70
R03_12_Cat04_T303	O=C(C(Cl)(Cl)C(OCC)=O)C1=CC=C(OC)C=C1	N[C@@H](C1=CC=CC=C1)[C@@H](N([Ru]Cl)S(C2=CC=C(C)C=C2)(=O)=O)C3=CC=CC=C3.CC(C)C4=CC=C(C)C=C4	303	100	0.17	27.57	71
R04_02_Cat05_T287	CC(C1CCCCC1)=O	Cl[Ru]N([C@H]([C@H](C1=CC=CC=C1)N([H])CCCC2=CC=CC=C2)C3=CC=CC=C3)S(C4=CC=C(C)C=C4)(=O)=O	287	200	0.17	27.57	72
R16_20_Cat10_T313	O=C(C1CC1)/C=C/C2=CC=C(OC)C=C2	N[C@@H](C1=CC=CC=C1)[C@@H](N(S(=O)(C2=CC=C(C(F)(F)F)C=C2)=O)[Ru]Cl)C3=CC=CC=C3.CC(C)C4=CC=C(C)C=C4	313	20	0.17	27.57	73
R16_01_Cat19_T313_08	O=C(C1CC1)/C=C/C2=CC=CC=C2	N[C@@H](C1=CC=CC=C1)[C@@H](N(S(=O)(C2=CC(F)=C(F)C(F)=C2)=O)[Ru]Cl)C3=CC=CC=C3.CC(C)C4=CC=C(C)C=C4	313	20	0.17	27.57	73
R16_12_Cat10_T313	O=C(C1CC1)/C=C/C2=CC(C)=CC=C2	N[C@@H](C1=CC=CC=C1)[C@@H](N(S(=O)(C2=CC=C(C(F)(F)F)C=C2)=O)[Ru]Cl)C3=CC=CC=C3.CC(C)C4=CC=C(C)C=C4	313	20	0.17	27.57	74
R16_21_Cat10_T313	O=C(C1CC1)/C=C/C2=CC(OC)=C(OC)C=C2	N[C@@H](C1=CC=CC=C1)[C@@H](N(S(=O)(C2=CC=C(C(F)(F)F)C=C2)=O)[Ru]Cl)C3=CC=CC=C3.CC(C)C4=CC=C(C)C=C4	313	20	0.17	27.57	74
R06_15_Cat06_T303	O=C(C1=CC=CC=C1)C2=CC(Cl)=C(Cl)C=C2	Cl[Ru]N([C@H]([C@H](C1=CC=CC=C1)N([H])CCOCC2=CC=C(C)C=C2)C3=CC=CC=C3)S(C4=CC=C(C)C=C4)(=O)=O	303	100	0.17	27.57	76
R06_17_Cat06_T303	O=C(C1=CC=CC=C1)C2=CC=C([N+]([O-])=O)C=C2	Cl[Ru]N([C@H]([C@H](C1=CC=CC=C1)N([H])CCOCC2=CC=C(C)C=C2)C3=CC=CC=C3)S(C4=CC=C(C)C=C4)(=O)=O	303	100	0.17	27.57	76
R17_02_Cat08_T298	O=C(C1OCCO1)/C=C(NC(C)=O)/C2=CC=C(C)C=C2	Cl[Rh]N([C@H]([C@H](C1=CC=CC=C1)N([H])CC(C=C(OC)C=C2)=C2C3C(C)=C(C)C(C)=C3C)C4=CC=CC=C4)S(C5=CC=C(C)C=C5)(=O)=O	298	100	0.17	27.57	76
R04_06_Cat05_T313	O=C(C(C)(C)C)C1=CC=CC=C1	Cl[Ru]N([C@H]([C@H](C1=CC=CC=C1)N([H])CCCC2=CC=CC=C2)C3=CC=CC=C3)S(C4=CC=C(C)C=C4)(=O)=O	313	200	0.17	27.57	77
R06_16_Cat06_T303	O=C(C1=CC=CC=C1)C2=CC(F)=C(F)C=C2	Cl[Ru]N([C@H]([C@H](C1=CC=CC=C1)N([H])CCOCC2=CC=C(C)C=C2)C3=CC=CC=C3)S(C4=CC=C(C)C=C4)(=O)=O	303	100	0.17	27.57	77
R13_01_Cat05_T298	CN(CC1=CC=CC=C1)C(C(CC(N(C)C2=CC=CC=C2)=O)=O)=O	Cl[Ru]N([C@H]([C@H](C1=CC=CC=C1)N([H])CCCC2=CC=CC=C2)C3=CC=CC=C3)S(C4=CC=C(C)C=C4)(=O)=O	298	67	0.17	27.57	77
R13_06_Cat05_T298	CN(CC=C)C(C(CC(N(C)C1=CC=CC=C1)=O)=O)=O	Cl[Ru]N([C@H]([C@H](C1=CC=CC=C1)N([H])CCCC2=CC=CC=C2)C3=CC=CC=C3)S(C4=CC=C(C)C=C4)(=O)=O	298	67	0.17	27.57	77
R16_02_Cat10_T313	O=C(C1CC1)/C=C/C2=C(F)C=CC=C2	N[C@@H](C1=CC=CC=C1)[C@@H](N(S(=O)(C2=CC=C(C(F)(F)F)C=C2)=O)[Ru]Cl)C3=CC=CC=C3.CC(C)C4=CC=C(C)C=C4	313	20	0.17	27.57	77
R16_01_Cat16_T313_05	O=C(C1CC1)/C=C/C2=CC=CC=C2	N[C@@H](C1=CC=CC=C1)[C@@H](N(S(=O)(C2=CC=C([N+]([O-])=O)C=C2)=O)[Ru]Cl)C3=CC=CC=C3.CC(C)C4=CC=C(C)C=C4	313	20	0.17	27.57	77
R16_01_Cat18_T313_07	O=C(C1CC1)/C=C/C2=CC=CC=C2	N[C@@H](C1=CC=CC=C1)[C@@H](N(S(=O)(C2=CC(C(F)(F)F)=CC(C(F)(F)F)=C2)=O)[Ru]Cl)C3=CC=CC=C3.CC(C)C4=CC=C(C)C=C4	313	20	0.17	27.57	77
R17_01_Cat08_T298	O=C(C1OCCO1)/C=C(NC(C)=O)/C2=CC=CC=C2	Cl[Rh]N([C@H]([C@H](C1=CC=CC=C1)N([H])CC(C=C(OC)C=C2)=C2C3C(C)=C(C)C(C)=C3C)C4=CC=CC=C4)S(C5=CC=C(C)C=C5)(=O)=O	298	100	0.17	27.57	77
R21_01_Cat04_T298_01	O=C(C(C)C#N)C1=CC=CC=C1	N[C@@H](C1=CC=CC=C1)[C@@H](N([Ru]Cl)S(C2=CC=C(C)C=C2)(=O)=O)C3=CC=CC=C3.CC(C)C4=CC=C(C)C=C4	298	100	0.17	27.57	77
R10_11_Cat05_T300	O=C(C(NC1=CC=C(C)C=C1)=O)C2=C(OC)C=CC(OC)=C2	Cl[Ru]N([C@H]([C@H](C1=CC=CC=C1)N([H])CCCC2=CC=CC=C2)C3=CC=CC=C3)S(C4=CC=C(C)C=C4)(=O)=O	300	100	0.17	27.57	77.9
R04_07_Cat05_T313	O=C(C1CC1)C2=CC=CC=C2	Cl[Ru]N([C@H]([C@H](C1=CC=CC=C1)N([H])CCCC2=CC=CC=C2)C3=CC=CC=C3)S(C4=CC=C(C)C=C4)(=O)=O	313	200	0.17	27.57	78
R04_08_Cat05_T313	O=C(C1CCCC1)C2=CC=CC=C2	Cl[Ru]N([C@H]([C@H](C1=CC=CC=C1)N([H])CCCC2=CC=CC=C2)C3=CC=CC=C3)S(C4=CC=C(C)C=C4)(=O)=O	313	200	0.17	27.57	78
R16_17_Cat10_T313	O=C(C1CC1)/C=C/C2=CC=C([N+]([O-])=O)C=C2	N[C@@H](C1=CC=CC=C1)[C@@H](N(S(=O)(C2=CC=C(C(F)(F)F)C=C2)=O)[Ru]Cl)C3=CC=CC=C3.CC(C)C4=CC=C(C)C=C4	313	20	0.17	27.57	78
R16_18_Cat10_T313	O=C(C1CC1)/C=C/C2=CC=C(C)C=C2	N[C@@H](C1=CC=CC=C1)[C@@H](N(S(=O)(C2=CC=C(C(F)(F)F)C=C2)=O)[Ru]Cl)C3=CC=CC=C3.CC(C)C4=CC=C(C)C=C4	313	20	0.17	27.57	78
R16_22_Cat10_T313	O=C(C1CC1)/C=C/C2=CC(Br)=C(OC)C=C2	N[C@@H](C1=CC=CC=C1)[C@@H](N(S(=O)(C2=CC=C(C(F)(F)F)C=C2)=O)[Ru]Cl)C3=CC=CC=C3.CC(C)C4=CC=C(C)C=C4	313	20	0.17	27.57	78
R06_24_Cat06_T303	O=C(C1=CC=C(OC)C=C1)C2=CC=C([N+]([O-])=O)C=C2	Cl[Ru]N([C@H]([C@H](C1=CC=CC=C1)N([H])CCOCC2=CC=C(C)C=C2)C3=CC=CC=C3)S(C4=CC=C(C)C=C4)(=O)=O	303	100	0.17	27.57	79
R13_04_Cat05_T298	CN(C1CCCCC1)C(C(CC(N(C)C2=CC=CC=C2)=O)=O)=O	Cl[Ru]N([C@H]([C@H](C1=CC=CC=C1)N([H])CCCC2=CC=CC=C2)C3=CC=CC=C3)S(C4=CC=C(C)C=C4)(=O)=O	298	67	0.17	27.57	79
R16_14_Cat10_T313	O=C(C1CC1)/C=C/C2=CC=C(Cl)C=C2	N[C@@H](C1=CC=CC=C1)[C@@H](N(S(=O)(C2=CC=C(C(F)(F)F)C=C2)=O)[Ru]Cl)C3=CC=CC=C3.CC(C)C4=CC=C(C)C=C4	313	20	0.17	27.57	79
R16_15_Cat10_T313	O=C(C1CC1)/C=C/C2=CC=C(Br)C=C2	N[C@@H](C1=CC=CC=C1)[C@@H](N(S(=O)(C2=CC=C(C(F)(F)F)C=C2)=O)[Ru]Cl)C3=CC=CC=C3.CC(C)C4=CC=C(C)C=C4	313	20	0.17	27.57	79
R16_01_Cat15_T313_04	O=C(C1CC1)/C=C/C2=CC=CC=C2	N[C@@H](C1=CC=CC=C1)[C@@H](N(S(=O)(C2=CC=C(OC(F)(F)F)C=C2)=O)[Ru]Cl)C3=CC=CC=C3.CC(C)C4=CC=C(C)C=C4	313	20	0.17	27.57	79
R16_01_Cat17_T313_06	O=C(C1CC1)/C=C/C2=CC=CC=C2	N[C@@H](C1=CC=CC=C1)[C@@H](N(S(=O)(C2=C(F)C(F)=C(F)C(F)=C2F)=O)[Ru]Cl)C3=CC=CC=C3.CC(C)C4=CC=C(C)C=C4	313	20	0.17	27.57	79
R10_08_Cat05_T300	O=C(C(NC1=CC=C(C)C=C1)=O)C2=C(C)C=CC=C2	Cl[Ru]N([C@H]([C@H](C1=CC=CC=C1)N([H])CCCC2=CC=CC=C2)C3=CC=CC=C3)S(C4=CC=C(C)C=C4)(=O)=O	300	100	0.17	27.57	79.1
R13_36_Cat05_T298	O=C(C(CCCC)=O)OCC	Cl[Ru]N([C@H]([C@H](C1=CC=CC=C1)N([H])CCCC2=CC=CC=C2)C3=CC=CC=C3)S(C4=CC=C(C)C=C4)(=O)=O	298	67	0.17	27.57	80
R19_16_Cat09_T298	CC1=NCCC2=CC=CC=C21	[H][Ru]N([C@H]([C@H](C1=CC=CC=C1)N([H])CC2=CC=CO2)C3=CC=CC=C3)S(C4=CC=C(C)C=C4)(=O)=O.C5=CC=CC=C5	298	100	0.17	27.57	80
R14_12_Cat05_T298	O=C(C1=CC=C(Br)C=C1)C2(C3)CC3(C2)C4=CC=CC=C4	Cl[Ru]N([C@H]([C@H](C1=CC=CC=C1)N([H])CCCC2=CC=CC=C2)C3=CC=CC=C3)S(C4=CC=C(C)C=C4)(=O)=O	298	100	0.17	27.57	81
R16_01_Cat10_T313	O=C(C1CC1)/C=C/C2=CC=CC=C2	N[C@@H](C1=CC=CC=C1)[C@@H](N(S(=O)(C2=CC=C(C(F)(F)F)C=C2)=O)[Ru]Cl)C3=CC=CC=C3.CC(C)C4=CC=C(C)C=C4	313	20	0.17	27.57	81
R16_06_Cat10_T313	O=C(C1CC1)/C=C/C2=C(C)C=CC=C2	N[C@@H](C1=CC=CC=C1)[C@@H](N(S(=O)(C2=CC=C(C(F)(F)F)C=C2)=O)[Ru]Cl)C3=CC=CC=C3.CC(C)C4=CC=C(C)C=C4	313	20	0.17	27.57	81
R16_13_Cat10_T313	O=C(C1CC1)/C=C/C2=CC(OC)=CC=C2	N[C@@H](C1=CC=CC=C1)[C@@H](N(S(=O)(C2=CC=C(C(F)(F)F)C=C2)=O)[Ru]Cl)C3=CC=CC=C3.CC(C)C4=CC=C(C)C=C4	313	20	0.17	27.57	81
R18_07_Cat11_T293	O=S1(C2=CC=CC=C2C(C3=CC(Cl)=CC=C3)=N1)=O	N[C@@H](C1=CC=CC=C1)[C@@H](N([Rh]Cl)S(C2=CC=C(C)C=C2)(=O)=O)C3=CC=CC=C3.CC4=C(C)C(C)C(C)=C4C	293	200	0.17	27.57	81
R19_15_Cat09_T298	COC1=C(OC)C=C(C(C)=NCC2)C2=C1	[H][Ru]N([C@H]([C@H](C1=CC=CC=C1)N([H])CC2=CC=CO2)C3=CC=CC=C3)S(C4=CC=C(C)C=C4)(=O)=O.C5=CC=CC=C5	298	100	0.17	27.57	81
R16_16_Cat10_T313	O=C(C1CC1)/C=C/C2=CC=C(C(F)(F)F)C=C2	N[C@@H](C1=CC=CC=C1)[C@@H](N(S(=O)(C2=CC=C(C(F)(F)F)C=C2)=O)[Ru]Cl)C3=CC=CC=C3.CC(C)C4=CC=C(C)C=C4	313	20	0.17	27.57	82
R16_19_Cat10_T313	O=C(C1CC1)/C=C/C2=CC=C(C(C)(C)C)C=C2	N[C@@H](C1=CC=CC=C1)[C@@H](N(S(=O)(C2=CC=C(C(F)(F)F)C=C2)=O)[Ru]Cl)C3=CC=CC=C3.CC(C)C4=CC=C(C)C=C4	313	20	0.17	27.57	82
R16_24_Cat10_T313	O=C(C1CC1)/C=C/C2=CC(C=CC=C3)=C3C=C2	N[C@@H](C1=CC=CC=C1)[C@@H](N(S(=O)(C2=CC=C(C(F)(F)F)C=C2)=O)[Ru]Cl)C3=CC=CC=C3.CC(C)C4=CC=C(C)C=C4	313	20	0.17	27.57	82
R02_04_Cat03_T301	O=C(CCl)C1=CC=CC=C1	Cl[Ru]N([C@H]1CCCC[C@@H]1N([H])CCCC2=CC=CC=C2)S(C3=CC=C(C)C=C3)(=O)=O	301	200	0.17	27.57	83
R02_07_Cat03_T301	CC(C1=CC(OC)=CC=C1)=O	Cl[Ru]N([C@H]1CCCC[C@@H]1N([H])CCCC2=CC=CC=C2)S(C3=CC=C(C)C=C3)(=O)=O	301	200	0.17	27.57	83
R16_04_Cat10_T313	O=C(C1CC1)/C=C/C2=C(Br)C=CC=C2	N[C@@H](C1=CC=CC=C1)[C@@H](N(S(=O)(C2=CC=C(C(F)(F)F)C=C2)=O)[Ru]Cl)C3=CC=CC=C3.CC(C)C4=CC=C(C)C=C4	313	20	0.17	27.57	83
R16_26_Cat10_T313	O=C(C1CC1)/C=C/CCC2=CC=CC=C2	N[C@@H](C1=CC=CC=C1)[C@@H](N(S(=O)(C2=CC=C(C(F)(F)F)C=C2)=O)[Ru]Cl)C3=CC=CC=C3.CC(C)C4=CC=C(C)C=C4	313	20	0.17	27.57	83
R18_02_Cat11_T293	COC1=C(OC)C=C(C(CC)=NCC2)C2=C1	N[C@@H](C1=CC=CC=C1)[C@@H](N([Rh]Cl)S(C2=CC=C(C)C=C2)(=O)=O)C3=CC=CC=C3.CC4=C(C)C(C)C(C)=C4C	293	200	0.17	27.57	83
R14_05_Cat05_T298	FC(C=C1)=CC=C1C(C2(C3)CC3(C2)C4=CC=CC=C4)=O	Cl[Ru]N([C@H]([C@H](C1=CC=CC=C1)N([H])CCCC2=CC=CC=C2)C3=CC=CC=C3)S(C4=CC=C(C)C=C4)(=O)=O	298	100	0.17	27.57	84
R16_10_Cat10_T313	O=C(C1CC1)/C=C/C2=CC(Br)=CC=C2	N[C@@H](C1=CC=CC=C1)[C@@H](N(S(=O)(C2=CC=C(C(F)(F)F)C=C2)=O)[Ru]Cl)C3=CC=CC=C3.CC(C)C4=CC=C(C)C=C4	313	20	0.17	27.57	84
R02_05_Cat03_T301	O=C(COC1=CC=CC=C1)C2=CC=CC=C2	Cl[Ru]N([C@H]1CCCC[C@@H]1N([H])CCCC2=CC=CC=C2)S(C3=CC=C(C)C=C3)(=O)=O	301	200	0.17	27.57	85
R14_10_Cat05_T298	O=C(C1=CC=C(OC2=CC=CC=C2)C=C1)C3(C4)CC4(C3)C5=CC=CC=C5	Cl[Ru]N([C@H]([C@H](C1=CC=CC=C1)N([H])CCCC2=CC=CC=C2)C3=CC=CC=C3)S(C4=CC=C(C)C=C4)(=O)=O	298	100	0.17	27.57	85
R16_03_Cat10_T313	O=C(C1CC1)/C=C/C2=C(Cl)C=CC=C2	N[C@@H](C1=CC=CC=C1)[C@@H](N(S(=O)(C2=CC=C(C(F)(F)F)C=C2)=O)[Ru]Cl)C3=CC=CC=C3.CC(C)C4=CC=C(C)C=C4	313	20	0.17	27.57	85
R16_08_Cat10_T313	O=C(C1CC1)/C=C/C2=CC(F)=CC=C2	N[C@@H](C1=CC=CC=C1)[C@@H](N(S(=O)(C2=CC=C(C(F)(F)F)C=C2)=O)[Ru]Cl)C3=CC=CC=C3.CC(C)C4=CC=C(C)C=C4	313	20	0.17	27.57	85
R16_09_Cat10_T313	O=C(C1CC1)/C=C/C2=CC(Cl)=CC=C2	N[C@@H](C1=CC=CC=C1)[C@@H](N(S(=O)(C2=CC=C(C(F)(F)F)C=C2)=O)[Ru]Cl)C3=CC=CC=C3.CC(C)C4=CC=C(C)C=C4	313	20	0.17	27.57	85
R16_11_Cat10_T313	O=C(C1CC1)/C=C/C2=CC([N+]([O-])=O)=CC=C2	N[C@@H](C1=CC=CC=C1)[C@@H](N(S(=O)(C2=CC=C(C(F)(F)F)C=C2)=O)[Ru]Cl)C3=CC=CC=C3.CC(C)C4=CC=C(C)C=C4	313	20	0.17	27.57	85
R16_25_Cat10_T313	O=C(C1CC1)/C=C/C2=CC=CO2	N[C@@H](C1=CC=CC=C1)[C@@H](N(S(=O)(C2=CC=C(C(F)(F)F)C=C2)=O)[Ru]Cl)C3=CC=CC=C3.CC(C)C4=CC=C(C)C=C4	313	20	0.17	27.57	85
R02_02_Cat03_T301	CC(C1=CC(Cl)=CC=C1)=O	Cl[Ru]N([C@H]1CCCC[C@@H]1N([H])CCCC2=CC=CC=C2)S(C3=CC=C(C)C=C3)(=O)=O	301	200	0.17	27.57	86
R02_03_Cat03_T301	CC(C1=CC=C(Cl)C=C1)=O	Cl[Ru]N([C@H]1CCCC[C@@H]1N([H])CCCC2=CC=CC=C2)S(C3=CC=C(C)C=C3)(=O)=O	301	200	0.17	27.57	86
R16_05_Cat10_T313	O=C(C1CC1)/C=C/C2=C(C(F)(F)F)C=CC=C2	N[C@@H](C1=CC=CC=C1)[C@@H](N(S(=O)(C2=CC=C(C(F)(F)F)C=C2)=O)[Ru]Cl)C3=CC=CC=C3.CC(C)C4=CC=C(C)C=C4	313	20	0.17	27.57	86
R16_23_Cat10_T313	O=C(C1CC1)/C=C/C2=CC([N+]([O-])=O)=CC=C2Cl	N[C@@H](C1=CC=CC=C1)[C@@H](N(S(=O)(C2=CC=C(C(F)(F)F)C=C2)=O)[Ru]Cl)C3=CC=CC=C3.CC(C)C4=CC=C(C)C=C4	313	20	0.17	27.57	87
R07_06_Cat05_T300	O=C1C(N2C=C(C3CCCCC3)N=N2)CCC4=CC=CC=C41	Cl[Ru]N([C@H]([C@H](C1=CC=CC=C1)N([H])CCCC2=CC=CC=C2)C3=CC=CC=C3)S(C4=CC=C(C)C=C4)(=O)=O	300	100	0.17	27.57	87.6
R02_02_Cat02_T301	CC(C1=CC(Cl)=CC=C1)=O	Cl[Ru]N([C@H]([C@H](C1=CC=CC=C1)N([H])CC(C=CC=C2)=C2C3=CC=CC=C3)C4=CC=CC=C4)S(C5=CC=C(C)C=C5)(=O)=O	301	200	0.17	27.57	88
R02_06_Cat03_T301	CC(C1=CC=CC(C(F)(F)F)=C1)=O	Cl[Ru]N([C@H]1CCCC[C@@H]1N([H])CCCC2=CC=CC=C2)S(C3=CC=C(C)C=C3)(=O)=O	301	200	0.17	27.57	88
R13_07_Cat05_T298	CN(CC#C)C(C(CC(N(C)C1=CC=CC=C1)=O)=O)=O	Cl[Ru]N([C@H]([C@H](C1=CC=CC=C1)N([H])CCCC2=CC=CC=C2)C3=CC=CC=C3)S(C4=CC=C(C)C=C4)(=O)=O	298	67	0.17	27.57	88
R14_09_Cat05_T298	O=C(C1=CC(OC)=C(OC)C(OC)=C1)C2(C3)CC3(C2)C4=CC=CC=C4	Cl[Ru]N([C@H]([C@H](C1=CC=CC=C1)N([H])CCCC2=CC=CC=C2)C3=CC=CC=C3)S(C4=CC=C(C)C=C4)(=O)=O	298	100	0.17	27.57	88
R17_22_Cat08_T298	O=C(C1OCCCO1)/C=C(NC(C)=O)/C2=CC=C([N+]([O-])=O)C=C2	Cl[Rh]N([C@H]([C@H](C1=CC=CC=C1)N([H])CC(C=C(OC)C=C2)=C2C3C(C)=C(C)C(C)=C3C)C4=CC=CC=C4)S(C5=CC=C(C)C=C5)(=O)=O	298	100	0.17	27.57	88
R19_01_Cat09_T298	ClC(C=C1)=CC=C1C2=NCCC3=CC=CC=C32	[H][Ru]N([C@H]([C@H](C1=CC=CC=C1)N([H])CC2=CC=CO2)C3=CC=CC=C3)S(C4=CC=C(C)C=C4)(=O)=O.C5=CC=CC=C5	298	100	0.17	27.57	88
R07_13_Cat05_T300	O=C1C(N2C(C=CC=C3)=C3N=N2)CCCC1	Cl[Ru]N([C@H]([C@H](C1=CC=CC=C1)N([H])CCCC2=CC=CC=C2)C3=CC=CC=C3)S(C4=CC=C(C)C=C4)(=O)=O	300	100	0.17	27.57	88.1
R07_07_Cat05_T300	O=C1C(N2C(C=CC=C3)=C3N=N2)CCC4=CC=CC=C41	Cl[Ru]N([C@H]([C@H](C1=CC=CC=C1)N([H])CCCC2=CC=CC=C2)C3=CC=CC=C3)S(C4=CC=C(C)C=C4)(=O)=O	300	100	0.17	27.57	88.3
R02_03_Cat02_T313	CC(C1=CC=C(Cl)C=C1)=O	Cl[Ru]N([C@H]([C@H](C1=CC=CC=C1)N([H])CC(C=CC=C2)=C2C3=CC=CC=C3)C4=CC=CC=C4)S(C5=CC=C(C)C=C5)(=O)=O	313	200	0.17	27.57	89
R13_11_Cat05_T298	S=C(C(CC(N(C)C1=CC=CC=C1)=O)=O)NC2=CC=CC=C2	Cl[Ru]N([C@H]([C@H](C1=CC=CC=C1)N([H])CCCC2=CC=CC=C2)C3=CC=CC=C3)S(C4=CC=C(C)C=C4)(=O)=O	298	67	0.17	27.57	89
R13_14_Cat05_T298	O=C(C(CC(N1CCCCC1)=O)=O)N(C)C2=CC=CC=C2	Cl[Ru]N([C@H]([C@H](C1=CC=CC=C1)N([H])CCCC2=CC=CC=C2)C3=CC=CC=C3)S(C4=CC=C(C)C=C4)(=O)=O	298	67	0.17	27.57	89
R18_03_Cat11_T293	COC1=C(OC)C=C(C(C(C)C)=NCC2)C2=C1	N[C@@H](C1=CC=CC=C1)[C@@H](N([Rh]Cl)S(C2=CC=C(C)C=C2)(=O)=O)C3=CC=CC=C3.CC4=C(C)C(C)C(C)=C4C	293	200	0.17	27.57	89
R19_08_Cat09_T298	O=[N+](C(C=C1)=CC=C1C2=NCCC3=CC=CC=C32)[O-]	[H][Ru]N([C@H]([C@H](C1=CC=CC=C1)N([H])CC2=CC=CO2)C3=CC=CC=C3)S(C4=CC=C(C)C=C4)(=O)=O.C5=CC=CC=C5	298	100	0.17	27.57	89
R07_12_Cat05_T300	O=C1C(N2C=C(C3=CC=C(OC)C=C3)N=N2)CCCC1	Cl[Ru]N([C@H]([C@H](C1=CC=CC=C1)N([H])CCCC2=CC=CC=C2)C3=CC=CC=C3)S(C4=CC=C(C)C=C4)(=O)=O	300	100	0.17	27.57	89.6
R06_10_Cat06_T303	O=C(C1=CC=CC=C1)C2=C(F)C(C(F)(F)F)=CC=C2	Cl[Ru]N([C@H]([C@H](C1=CC=CC=C1)N([H])CCOCC2=CC=C(C)C=C2)C3=CC=CC=C3)S(C4=CC=C(C)C=C4)(=O)=O	303	100	0.17	27.57	90
R09_10_Cat09_T298	O=C(CN1C=CN=C1)C2=CC=CC=C2	[H][Ru]N([C@H]([C@H](C1=CC=CC=C1)N([H])CC2=CC=CO2)C3=CC=CC=C3)S(C4=CC=C(C)C=C4)(=O)=O.C5=CC=CC=C5	298	100	0.17	27.57	90
R13_31_Cat05_T298	O=C(C(CC(OCC)=O)=O)N(C)CC1=CC=CC=C1	Cl[Ru]N([C@H]([C@H](C1=CC=CC=C1)N([H])CCCC2=CC=CC=C2)C3=CC=CC=C3)S(C4=CC=C(C)C=C4)(=O)=O	298	67	0.17	27.57	90
R13_35_Cat05_T298	O=C(C(CCCC)=O)NCC	Cl[Ru]N([C@H]([C@H](C1=CC=CC=C1)N([H])CCCC2=CC=CC=C2)C3=CC=CC=C3)S(C4=CC=C(C)C=C4)(=O)=O	298	67	0.17	27.57	90
R14_08_Cat05_T298	O=C(C1=CC(OC)=CC(OC)=C1)C2(C3)CC3(C2)C4=CC=CC=C4	Cl[Ru]N([C@H]([C@H](C1=CC=CC=C1)N([H])CCCC2=CC=CC=C2)C3=CC=CC=C3)S(C4=CC=C(C)C=C4)(=O)=O	298	100	0.17	27.57	90
R18_01_Cat11_T293	CC1=NCCC2=CC(OC)=C(OC)C=C21	N[C@@H](C1=CC=CC=C1)[C@@H](N([Rh]Cl)S(C2=CC=C(C)C=C2)(=O)=O)C3=CC=CC=C3.CC4=C(C)C(C)C(C)=C4C	293	200	0.17	27.57	90
R19_04_Cat09_T298	CC(C=C1)=CC=C1C2=NCCC3=CC=CC=C32	[H][Ru]N([C@H]([C@H](C1=CC=CC=C1)N([H])CC2=CC=CO2)C3=CC=CC=C3)S(C4=CC=C(C)C=C4)(=O)=O.C5=CC=CC=C5	298	100	0.17	27.57	90
R19_07_Cat09_T298	COC1=CC=CC=C1C2=NCCC3=CC=CC=C32	[H][Ru]N([C@H]([C@H](C1=CC=CC=C1)N([H])CC2=CC=CO2)C3=CC=CC=C3)S(C4=CC=C(C)C=C4)(=O)=O.C5=CC=CC=C5	298	100	0.17	27.57	90
R19_11_Cat09_T298	C12=CC=CC=C1CCN=C2C3=CC(OCO4)=C4C=C3	[H][Ru]N([C@H]([C@H](C1=CC=CC=C1)N([H])CC2=CC=CO2)C3=CC=CC=C3)S(C4=CC=C(C)C=C4)(=O)=O.C5=CC=CC=C5	298	100	0.17	27.57	90
R06_09_Cat06_T283	O=C(C1=CC=CC=C1)C2=C(F)C=CC(F)=C2	Cl[Ru]N([C@H]([C@H](C1=CC=CC=C1)N([H])CCOCC2=CC=C(C)C=C2)C3=CC=CC=C3)S(C4=CC=C(C)C=C4)(=O)=O	283	100	0.17	27.57	91
R13_10_Cat05_T298	O=C(C(CC(N(C)C1=CC=CC=C1)=O)=O)NC2=CC=CC=C2	Cl[Ru]N([C@H]([C@H](C1=CC=CC=C1)N([H])CCCC2=CC=CC=C2)C3=CC=CC=C3)S(C4=CC=C(C)C=C4)(=O)=O	298	67	0.17	27.57	91
R14_15_Cat05_T298	O=C(C1=CC=CC=N1)C2(C3)CC3(C2)C4=CC=CC=C4	Cl[Ru]N([C@H]([C@H](C1=CC=CC=C1)N([H])CCCC2=CC=CC=C2)C3=CC=CC=C3)S(C4=CC=C(C)C=C4)(=O)=O	298	100	0.17	27.57	91
R19_02_Cat09_T298	ClC1=CC(C2=NCCC3=CC=CC=C32)=CC=C1	[H][Ru]N([C@H]([C@H](C1=CC=CC=C1)N([H])CC2=CC=CO2)C3=CC=CC=C3)S(C4=CC=C(C)C=C4)(=O)=O.C5=CC=CC=C5	298	100	0.17	27.57	91
R19_09_Cat09_T298	FC(C(C=C1)=CC=C1C2=NCCC3=CC=CC=C32)(F)F	[H][Ru]N([C@H]([C@H](C1=CC=CC=C1)N([H])CC2=CC=CO2)C3=CC=CC=C3)S(C4=CC=C(C)C=C4)(=O)=O.C5=CC=CC=C5	298	100	0.17	27.57	91
R19_10_Cat09_T298	COC(C(OC)=C1)=CC=C1C2=NCCC3=CC=CC=C32	[H][Ru]N([C@H]([C@H](C1=CC=CC=C1)N([H])CC2=CC=CO2)C3=CC=CC=C3)S(C4=CC=C(C)C=C4)(=O)=O.C5=CC=CC=C5	298	100	0.17	27.57	91
R07_15_Cat05_T300	O=C(CCC1)C1N2C=C(C3=CC=CC=C3)N=N2	Cl[Ru]N([C@H]([C@H](C1=CC=CC=C1)N([H])CCCC2=CC=CC=C2)C3=CC=CC=C3)S(C4=CC=C(C)C=C4)(=O)=O	300	100	0.17	27.57	91.5
R07_09_Cat05_T300	O=C1C(N2C=C(C3=CC=CC=C3)N=N2)CCC4=CC=CC=C41	Cl[Ru]N([C@H]([C@H](C1=CC=CC=C1)N([H])CCCC2=CC=CC=C2)C3=CC=CC=C3)S(C4=CC=C(C)C=C4)(=O)=O	300	100	0.17	27.57	91.8
R02_04_Cat02_T301	O=C(CCl)C1=CC=CC=C1	Cl[Ru]N([C@H]([C@H](C1=CC=CC=C1)N([H])CC(C=CC=C2)=C2C3=CC=CC=C3)C4=CC=CC=C4)S(C5=CC=C(C)C=C5)(=O)=O	301	200	0.17	27.57	92
R09_07_Cat09_T298	O=C(CC1=CC=CN1)C2=CC=CC=C2	[H][Ru]N([C@H]([C@H](C1=CC=CC=C1)N([H])CC2=CC=CO2)C3=CC=CC=C3)S(C4=CC=C(C)C=C4)(=O)=O.C5=CC=CC=C5	298	100	0.17	27.57	92
R13_15_Cat05_T298	O=C(C(CC(N1CCCCC1)=O)=O)N2CCCCC2	Cl[Ru]N([C@H]([C@H](C1=CC=CC=C1)N([H])CCCC2=CC=CC=C2)C3=CC=CC=C3)S(C4=CC=C(C)C=C4)(=O)=O	298	67	0.17	27.57	92
R13_16_Cat05_T298	O=C(C(CC(N1CCCCC1)=O)=O)N2CCOCC2	Cl[Ru]N([C@H]([C@H](C1=CC=CC=C1)N([H])CCCC2=CC=CC=C2)C3=CC=CC=C3)S(C4=CC=C(C)C=C4)(=O)=O	298	67	0.17	27.57	92
R13_33_Cat05_T298	O=C(C(CC(OCC)=O)=O)N1CCOCC1	Cl[Ru]N([C@H]([C@H](C1=CC=CC=C1)N([H])CCCC2=CC=CC=C2)C3=CC=CC=C3)S(C4=CC=C(C)C=C4)(=O)=O	298	67	0.17	27.57	92
R19_05_Cat09_T298	CC1=CC(C2=NCCC3=CC=CC=C32)=CC=C1	[H][Ru]N([C@H]([C@H](C1=CC=CC=C1)N([H])CC2=CC=CO2)C3=CC=CC=C3)S(C4=CC=C(C)C=C4)(=O)=O.C5=CC=CC=C5	298	100	0.17	27.57	92
R19_06_Cat09_T298	COC(C=C1)=CC=C1C2=NCCC3=CC=CC=C32	[H][Ru]N([C@H]([C@H](C1=CC=CC=C1)N([H])CC2=CC=CO2)C3=CC=CC=C3)S(C4=CC=C(C)C=C4)(=O)=O.C5=CC=CC=C5	298	100	0.17	27.57	92
R19_12_Cat09_T298	COC1=C(OC)C=C(C(C2=CC=CC=C2)=NCC3)C3=C1	[H][Ru]N([C@H]([C@H](C1=CC=CC=C1)N([H])CC2=CC=CO2)C3=CC=CC=C3)S(C4=CC=C(C)C=C4)(=O)=O.C5=CC=CC=C5	298	100	0.17	27.57	92
R22_05_Cat13_T333	CC(C1=CC=C(OC)C2=C1C=CC=C2)=O	N[C@@H](C1=CC=CC=C1)[C@@H](N(S(=O)(N(CCC2=CC=C(C)C=C2)C)=O)[Ru]Cl)C3=CC=CC=C3	333	200	0.17	27.57	92.3
R02_05_Cat02_T301	O=C(COC1=CC=CC=C1)C2=CC=CC=C2	Cl[Ru]N([C@H]([C@H](C1=CC=CC=C1)N([H])CC(C=CC=C2)=C2C3=CC=CC=C3)C4=CC=CC=C4)S(C5=CC=C(C)C=C5)(=O)=O	301	200	0.17	27.57	93
R06_18_Cat06_T303	O=C(C1=CC=CC=C1)C2=CC([N+]([O-])=O)=C(Cl)C=C2	Cl[Ru]N([C@H]([C@H](C1=CC=CC=C1)N([H])CCOCC2=CC=C(C)C=C2)C3=CC=CC=C3)S(C4=CC=C(C)C=C4)(=O)=O	303	100	0.17	27.57	93
R13_34_Cat05_T298	O=C(C(CCCC)=O)NC1=CC=CC=C1	Cl[Ru]N([C@H]([C@H](C1=CC=CC=C1)N([H])CCCC2=CC=CC=C2)C3=CC=CC=C3)S(C4=CC=C(C)C=C4)(=O)=O	298	67	0.17	27.57	93
R14_02_Cat05_T298	O=C(C1=CC=CC(C)=C1)C2(C3)CC3(C2)C4=CC=CC=C4	Cl[Ru]N([C@H]([C@H](C1=CC=CC=C1)N([H])CCCC2=CC=CC=C2)C3=CC=CC=C3)S(C4=CC=C(C)C=C4)(=O)=O	298	100	0.17	27.57	93
R19_03_Cat09_T298	BrC(C=C1)=CC=C1C2=NCCC3=CC=CC=C32	[H][Ru]N([C@H]([C@H](C1=CC=CC=C1)N([H])CC2=CC=CO2)C3=CC=CC=C3)S(C4=CC=C(C)C=C4)(=O)=O.C5=CC=CC=C5	298	100	0.17	27.57	93
R19_14_Cat09_T298	COC1=C(OC)C=C(C(C2=CC=C(OC)C(OC)=C2)=NCC3)C3=C1	[H][Ru]N([C@H]([C@H](C1=CC=CC=C1)N([H])CC2=CC=CO2)C3=CC=CC=C3)S(C4=CC=C(C)C=C4)(=O)=O.C5=CC=CC=C5	298	100	0.17	27.57	93
R04_01_Cat05_T353	CC(C1=CC=CC=C1)=O	Cl[Ru]N([C@H]([C@H](C1=CC=CC=C1)N([H])CCCC2=CC=CC=C2)C3=CC=CC=C3)S(C4=CC=C(C)C=C4)(=O)=O	353	200	0.17	27.57	94
R04_03_Cat05_T313	O=C(C1=CC=CC=C1)C2CCCCC2	Cl[Ru]N([C@H]([C@H](C1=CC=CC=C1)N([H])CCCC2=CC=CC=C2)C3=CC=CC=C3)S(C4=CC=C(C)C=C4)(=O)=O	313	200	0.17	27.57	94
R09_02_Cat09_T298	O=C(CC1=CN=CC=C1)C2=CC=CC=C2	[H][Ru]N([C@H]([C@H](C1=CC=CC=C1)N([H])CC2=CC=CO2)C3=CC=CC=C3)S(C4=CC=C(C)C=C4)(=O)=O.C5=CC=CC=C5	298	100	0.17	27.57	94
R09_05_Cat09_T298	O=C(CC1=CC(C)=NO1)C2=CC=CC=C2	[H][Ru]N([C@H]([C@H](C1=CC=CC=C1)N([H])CC2=CC=CO2)C3=CC=CC=C3)S(C4=CC=C(C)C=C4)(=O)=O.C5=CC=CC=C5	298	100	0.17	27.57	94
R09_06_Cat09_T298	O=C(CC1=CC=CS1)C2=CC=CC=C2	[H][Ru]N([C@H]([C@H](C1=CC=CC=C1)N([H])CC2=CC=CO2)C3=CC=CC=C3)S(C4=CC=C(C)C=C4)(=O)=O.C5=CC=CC=C5	298	100	0.17	27.57	94
R13_02_Cat05_T298	CN(CC1=CC=CC=C1)C(C(CC(N(C)CC2=CC=CC=C2)=O)=O)=O	Cl[Ru]N([C@H]([C@H](C1=CC=CC=C1)N([H])CCCC2=CC=CC=C2)C3=CC=CC=C3)S(C4=CC=C(C)C=C4)(=O)=O	298	67	0.17	27.57	94
R13_08_Cat05_T298	CN(CC=C)C(C(CC(N(C)CC=C)=O)=O)=O	Cl[Ru]N([C@H]([C@H](C1=CC=CC=C1)N([H])CCCC2=CC=CC=C2)C3=CC=CC=C3)S(C4=CC=C(C)C=C4)(=O)=O	298	67	0.17	27.57	94
R13_24_Cat05_T298	O=C(N1CCCCC1)CCC(C(NC2=CC=CC=C2)=O)=O	Cl[Ru]N([C@H]([C@H](C1=CC=CC=C1)N([H])CCCC2=CC=CC=C2)C3=CC=CC=C3)S(C4=CC=C(C)C=C4)(=O)=O	298	67	0.17	27.57	94
R13_32_Cat05_T298	O=C(C(CC(OCC)=O)=O)N1CCCCC1	Cl[Ru]N([C@H]([C@H](C1=CC=CC=C1)N([H])CCCC2=CC=CC=C2)C3=CC=CC=C3)S(C4=CC=C(C)C=C4)(=O)=O	298	67	0.17	27.57	94
R17_20_Cat08_T298	O=C(C1OCCCO1)/C=C(NC(C)=O)/C2=CC(F)=C(Cl)C=C2	Cl[Rh]N([C@H]([C@H](C1=CC=CC=C1)N([H])CC(C=C(OC)C=C2)=C2C3C(C)=C(C)C(C)=C3C)C4=CC=CC=C4)S(C5=CC=C(C)C=C5)(=O)=O	298	100	0.17	27.57	94
R17_21_Cat08_T298	O=C(C1OCCCO1)/C=C(NC(C)=O)/C2=CC=C(C(F)(F)F)C=C2	Cl[Rh]N([C@H]([C@H](C1=CC=CC=C1)N([H])CC(C=C(OC)C=C2)=C2C3C(C)=C(C)C(C)=C3C)C4=CC=CC=C4)S(C5=CC=C(C)C=C5)(=O)=O	298	100	0.17	27.57	94
R07_04_Cat05_T300	O=C1C(N2C=C(C3=CC=C(CCCCCC)C=C3)N=N2)CCC4=CC=CC=C41	Cl[Ru]N([C@H]([C@H](C1=CC=CC=C1)N([H])CCCC2=CC=CC=C2)C3=CC=CC=C3)S(C4=CC=C(C)C=C4)(=O)=O	300	100	0.17	27.57	94.3
R10_12_Cat05_T300	O=C(C(NC1=CC=C(C)C=C1)=O)C2=C(C(C)C)C=C(C(C)C)C=C2C(C)C	Cl[Ru]N([C@H]([C@H](C1=CC=CC=C1)N([H])CCCC2=CC=CC=C2)C3=CC=CC=C3)S(C4=CC=C(C)C=C4)(=O)=O	300	100	0.17	27.57	94.42
R01_03_Cat01_T301	CC(C1=CC=C(Cl)C=C1)=O	N[C@@H](C1=CC=CC=C1)[C@@H](N([Ru]Cl)S(C2=CC=C(C)C=C2)(=O)=O)C3=CC=CC=C3.CC4=CC(C)=CC(C)=C4	301	200	0.17	27.57	95
R01_07_Cat01_T301	O=C(CCCC(OCC)=O)C1=CC=CC=C1	N[C@@H](C1=CC=CC=C1)[C@@H](N([Ru]Cl)S(C2=CC=C(C)C=C2)(=O)=O)C3=CC=CC=C3.CC4=CC(C)=CC(C)=C4	301	200	0.17	27.57	95
R02_01_Cat02_T313	CC(C1=CC=CC=C1)=O	Cl[Ru]N([C@H]([C@H](C1=CC=CC=C1)N([H])CC(C=CC=C2)=C2C3=CC=CC=C3)C4=CC=CC=C4)S(C5=CC=C(C)C=C5)(=O)=O	313	200	0.17	27.57	95
R04_04_Cat05_T301	O=C(CC)C1=CC=CC=C1	Cl[Ru]N([C@H]([C@H](C1=CC=CC=C1)N([H])CCCC2=CC=CC=C2)C3=CC=CC=C3)S(C4=CC=C(C)C=C4)(=O)=O	301	200	0.17	27.57	95
R04_04_Cat05_T313	O=C(CC)C1=CC=CC=C1	Cl[Ru]N([C@H]([C@H](C1=CC=CC=C1)N([H])CCCC2=CC=CC=C2)C3=CC=CC=C3)S(C4=CC=C(C)C=C4)(=O)=O	313	200	0.17	27.57	95
R04_05_Cat05_T313	O=C(C(C)C)C1=CC=CC=C1	Cl[Ru]N([C@H]([C@H](C1=CC=CC=C1)N([H])CCCC2=CC=CC=C2)C3=CC=CC=C3)S(C4=CC=C(C)C=C4)(=O)=O	313	200	0.17	27.57	95
R06_19_Cat06_T283	O=C(C1=CC=CC=C1)C2=CC(F)=C(F)C(F)=C2	Cl[Ru]N([C@H]([C@H](C1=CC=CC=C1)N([H])CCOCC2=CC=C(C)C=C2)C3=CC=CC=C3)S(C4=CC=C(C)C=C4)(=O)=O	283	100	0.17	27.57	95
R09_03_Cat09_T298	O=C(CC1=CC=NC=C1)C2=CC=CC=C2	[H][Ru]N([C@H]([C@H](C1=CC=CC=C1)N([H])CC2=CC=CO2)C3=CC=CC=C3)S(C4=CC=C(C)C=C4)(=O)=O.C5=CC=CC=C5	298	100	0.17	27.57	95
R09_08_Cat09_T298	O=C(CN1C=C(C2=CC=CC=C2)N=N1)C3=CC=CC=C3	[H][Ru]N([C@H]([C@H](C1=CC=CC=C1)N([H])CC2=CC=CO2)C3=CC=CC=C3)S(C4=CC=C(C)C=C4)(=O)=O.C5=CC=CC=C5	298	100	0.17	27.57	95
R09_11_Cat09_T298	O=C(CN1C=CC=C1)C2=CC=CC=C2	[H][Ru]N([C@H]([C@H](C1=CC=CC=C1)N([H])CC2=CC=CO2)C3=CC=CC=C3)S(C4=CC=C(C)C=C4)(=O)=O.C5=CC=CC=C5	298	100	0.17	27.57	95
R13_12_Cat05_T298	O=C(C(CC(N([H])C1=CC=CC=C1)=O)=O)NC2=CC=CC=C2	Cl[Ru]N([C@H]([C@H](C1=CC=CC=C1)N([H])CCCC2=CC=CC=C2)C3=CC=CC=C3)S(C4=CC=C(C)C=C4)(=O)=O	298	67	0.17	27.57	95
R13_22_Cat05_T298	CNC(C(CC(N1CCCCC1)=O)=O)=O	Cl[Ru]N([C@H]([C@H](C1=CC=CC=C1)N([H])CCCC2=CC=CC=C2)C3=CC=CC=C3)S(C4=CC=C(C)C=C4)(=O)=O	298	67	0.17	27.57	95
R14_17_Cat05_T298	O=C(C#CC1=CC=CC=C1)C2(C3)CC3(C2)C4=CC=CC=C4	Cl[Ru]N([C@H]([C@H](C1=CC=CC=C1)N([H])CCCC2=CC=CC=C2)C3=CC=CC=C3)S(C4=CC=C(C)C=C4)(=O)=O	298	100	0.17	27.57	95
R14_18_Cat05_T298	O=C(C#CC1=CC=C(OC)C=C1)C2(C3)CC3(C2)C4=CC=CC=C4	Cl[Ru]N([C@H]([C@H](C1=CC=CC=C1)N([H])CCCC2=CC=CC=C2)C3=CC=CC=C3)S(C4=CC=C(C)C=C4)(=O)=O	298	100	0.17	27.57	95
R17_16_Cat08_T298	O=C(C1OCCCO1)/C=C(NC(C)=O)/C2=CC=CC=C2C	Cl[Rh]N([C@H]([C@H](C1=CC=CC=C1)N([H])CC(C=C(OC)C=C2)=C2C3C(C)=C(C)C(C)=C3C)C4=CC=CC=C4)S(C5=CC=C(C)C=C5)(=O)=O	298	100	0.17	27.57	95
R20_11_Cat12_T323	O=C1C(CC2=CC(F)=CC=C2F)N3CCC1CC3	N[C@@H](C1=CC=CC=C1)[C@@H](N(S(=O)(C2=C(F)C(F)=C(F)C(F)=C2F)=O)[Ru]Cl)C3=CC=CC=C3.CC(C)C4=CC=C(C)C=C4	323	100	-0.14	72.3	95
R22_01_Cat13_T333	CC(C1=C(O)C=CC2=C1C=CC=C2)=O	N[C@@H](C1=CC=CC=C1)[C@@H](N(S(=O)(N(CCC2=CC=C(C)C=C2)C)=O)[Ru]Cl)C3=CC=CC=C3	333	1000	0.17	27.57	95
R07_11_Cat05_T300	O=C1C(N2C=C(C3=CC=C(C)C=C3)N=N2)CCCC1	Cl[Ru]N([C@H]([C@H](C1=CC=CC=C1)N([H])CCCC2=CC=CC=C2)C3=CC=CC=C3)S(C4=CC=C(C)C=C4)(=O)=O	300	100	0.17	27.57	95.2
R10_06_Cat05_T300	O=C(C(NC1=CC=C(C)C=C1)=O)C2=C(F)C=CC=C2	Cl[Ru]N([C@H]([C@H](C1=CC=CC=C1)N([H])CCCC2=CC=CC=C2)C3=CC=CC=C3)S(C4=CC=C(C)C=C4)(=O)=O	300	100	0.17	27.57	95.3
R07_10_Cat05_T300	O=C1C(N2C=C(C3=CC=CC=C3)N=N2)CCCC1	Cl[Ru]N([C@H]([C@H](C1=CC=CC=C1)N([H])CCCC2=CC=CC=C2)C3=CC=CC=C3)S(C4=CC=C(C)C=C4)(=O)=O	300	100	0.17	27.57	95.4
R07_14_Cat05_T300	O=C(CCCCC1)C1N2C=C(C3=CC=CC=C3)N=N2	Cl[Ru]N([C@H]([C@H](C1=CC=CC=C1)N([H])CCCC2=CC=CC=C2)C3=CC=CC=C3)S(C4=CC=C(C)C=C4)(=O)=O	300	100	0.17	27.57	95.5
R01_08_Cat01_T301	CC(C1=CC(C=CC=C2)=C2C=C1)=O	N[C@@H](C1=CC=CC=C1)[C@@H](N([Ru]Cl)S(C2=CC=C(C)C=C2)(=O)=O)C3=CC=CC=C3.CC4=CC(C)=CC(C)=C4	301	200	0.17	27.57	96
R01_01_Cat01_T333	CC(C1=CC=CC=C1)=O	N[C@@H](C1=CC=CC=C1)[C@@H](N([Ru]Cl)S(C2=CC=C(C)C=C2)(=O)=O)C3=CC=CC=C3.CC4=CC(C)=CC(C)=C4	333	200	0.17	27.57	96
R04_01_Cat05_T301	CC(C1=CC=CC=C1)=O	Cl[Ru]N([C@H]([C@H](C1=CC=CC=C1)N([H])CCCC2=CC=CC=C2)C3=CC=CC=C3)S(C4=CC=C(C)C=C4)(=O)=O	301	200	0.17	27.57	96
R04_01_Cat05_T313	CC(C1=CC=CC=C1)=O	Cl[Ru]N([C@H]([C@H](C1=CC=CC=C1)N([H])CCCC2=CC=CC=C2)C3=CC=CC=C3)S(C4=CC=C(C)C=C4)(=O)=O	313	200	0.17	27.57	96
R09_04_Cat09_T298	O=C(CC1=CC=CO1)C2=CC=CC=C2	[H][Ru]N([C@H]([C@H](C1=CC=CC=C1)N([H])CC2=CC=CO2)C3=CC=CC=C3)S(C4=CC=C(C)C=C4)(=O)=O.C5=CC=CC=C5	298	100	0.17	27.57	96
R09_09_Cat09_T298	O=C(CN1N=CN=C1)C2=CC=CC=C2	[H][Ru]N([C@H]([C@H](C1=CC=CC=C1)N([H])CC2=CC=CO2)C3=CC=CC=C3)S(C4=CC=C(C)C=C4)(=O)=O.C5=CC=CC=C5	298	100	0.17	27.57	96
R09_13_Cat09_T298	O=C(CC1=CNC2=C1C=CC=C2)C3=CC=CC=C3	[H][Ru]N([C@H]([C@H](C1=CC=CC=C1)N([H])CC2=CC=CO2)C3=CC=CC=C3)S(C4=CC=C(C)C=C4)(=O)=O.C5=CC=CC=C5	298	100	0.17	27.57	96
R14_21_Cat05_T298	O=C(C#CC1=CC=C(Cl)C=C1)C2(C3)CC3(C2)C4=CC=CC=C4	Cl[Ru]N([C@H]([C@H](C1=CC=CC=C1)N([H])CCCC2=CC=CC=C2)C3=CC=CC=C3)S(C4=CC=C(C)C=C4)(=O)=O	298	100	0.17	27.57	96
R17_04_Cat08_T298	O=C(C(OCC)OCC)/C=C(NC(C)=O)/C1=CC=CC=C1	Cl[Rh]N([C@H]([C@H](C1=CC=CC=C1)N([H])CC(C=C(OC)C=C2)=C2C3C(C)=C(C)C(C)=C3C)C4=CC=CC=C4)S(C5=CC=C(C)C=C5)(=O)=O	298	100	0.17	27.57	96
R17_08_Cat08_T298	O=C(C1OCCCO1)/C=C(NC(C)=O)/C2=CC=C(C)C=C2	Cl[Rh]N([C@H]([C@H](C1=CC=CC=C1)N([H])CC(C=C(OC)C=C2)=C2C3C(C)=C(C)C(C)=C3C)C4=CC=CC=C4)S(C5=CC=C(C)C=C5)(=O)=O	298	100	0.17	27.57	96
R17_14_Cat08_T298	O=C(C1OCCCO1)/C=C(NC(C)=O)/C2=CC=C(C)C=C2	Cl[Rh]N([C@H]([C@H](C1=CC=CC=C1)N([H])CC(C=C(OC)C=C2)=C2C3C(C)=C(C)C(C)=C3C)C4=CC=CC=C4)S(C5=CC=C(C)C=C5)(=O)=O	298	100	0.17	27.57	96
R17_18_Cat08_T298	O=C(C1OCCCO1)/C=C(NC(C)=O)/C2=CC=C(F)C=C2	Cl[Rh]N([C@H]([C@H](C1=CC=CC=C1)N([H])CC(C=C(OC)C=C2)=C2C3C(C)=C(C)C(C)=C3C)C4=CC=CC=C4)S(C5=CC=C(C)C=C5)(=O)=O	298	100	0.17	27.57	96
R01_02_Cat01_T301	CC(C1=CC(Cl)=CC=C1)=O	N[C@@H](C1=CC=CC=C1)[C@@H](N([Ru]Cl)S(C2=CC=C(C)C=C2)(=O)=O)C3=CC=CC=C3.CC4=CC(C)=CC(C)=C4	301	200	0.17	27.57	97
R01_05_Cat01_T301	CC(C1=CC=C(OC)C=C1)=O	N[C@@H](C1=CC=CC=C1)[C@@H](N([Ru]Cl)S(C2=CC=C(C)C=C2)(=O)=O)C3=CC=CC=C3.CC4=CC(C)=CC(C)=C4	301	200	0.17	27.57	97
R01_06_Cat01_T301	O=C(CC)C1=CC=CC=C1	N[C@@H](C1=CC=CC=C1)[C@@H](N([Ru]Cl)S(C2=CC=C(C)C=C2)(=O)=O)C3=CC=CC=C3.CC4=CC(C)=CC(C)=C4	301	200	0.17	27.57	97
R01_12_Cat01_T301	O=C1CC(C)(C)OC2=CC=CC=C21	N[C@@H](C1=CC=CC=C1)[C@@H](N([Ru]Cl)S(C2=CC=C(C)C=C2)(=O)=O)C3=CC=CC=C3.CC4=CC(C)=CC(C)=C4	301	200	0.17	27.57	97
R05_08_Cat07_T333	O=C1C(Cl)CCCC2=CC=CC=C21	Cl[Ru]N([C@H]([C@H](C1=CC=CC=C1)N([H])CCOCC2=CC=C(C)C=C2)C3=CC=CC=C3)S(C)(=O)=O	333	100	0.17	27.57	97
R06_05_Cat06_T333	O=C(C1=CC=CC=C1)C2=C(C)C=C(C)C=C2	Cl[Ru]N([C@H]([C@H](C1=CC=CC=C1)N([H])CCOCC2=CC=C(C)C=C2)C3=CC=CC=C3)S(C4=CC=C(C)C=C4)(=O)=O	333	100	0.17	27.57	97
R06_12_Cat06_T303	O=C(C1=CC=C(Cl)C=C1)C2=C(Cl)C=CC=C2	Cl[Ru]N([C@H]([C@H](C1=CC=CC=C1)N([H])CCOCC2=CC=C(C)C=C2)C3=CC=CC=C3)S(C4=CC=C(C)C=C4)(=O)=O	303	100	0.17	27.57	97
R06_13_Cat06_T313	O=C(C1=CC=C(F)C=C1)C2=C(Cl)C=CC=C2	Cl[Ru]N([C@H]([C@H](C1=CC=CC=C1)N([H])CCOCC2=CC=C(C)C=C2)C3=CC=CC=C3)S(C4=CC=C(C)C=C4)(=O)=O	313	100	0.17	27.57	97
R8_05_Cat08_T303	O=C1CCN(C(OC(C)(C)C)=O)C2=CC(OC)=C(OC)C=C21	Cl[Rh]N([C@H]([C@H](C1=CC=CC=C1)N([H])CC(C=C(OC)C=C2)=C2C3C(C)=C(C)C(C)=C3C)C4=CC=CC=C4)S(C5=CC=C(C)C=C5)(=O)=O	303	100	0.17	27.57	97
R09_12_Cat09_T298	O=C(CN1C=CC2=C1C=CC=C2)C3=CC=CC=C3	[H][Ru]N([C@H]([C@H](C1=CC=CC=C1)N([H])CC2=CC=CO2)C3=CC=CC=C3)S(C4=CC=C(C)C=C4)(=O)=O.C5=CC=CC=C5	298	100	0.17	27.57	97
R12_03_Cat08_T323	O=C(C1=CC=CC=C1OC/2)C2=C\C3=C(OC)C=CC=C3	Cl[Rh]N([C@H]([C@H](C1=CC=CC=C1)N([H])CC(C=C(OC)C=C2)=C2C3C(C)=C(C)C(C)=C3C)C4=CC=CC=C4)S(C5=CC=C(C)C=C5)(=O)=O	323	200	-0.327467	27.0267	97
R13_17_Cat05_T298	O=C(C(CC(N1CCCCC1)=O)=O)NC2=CC=CC=C2	Cl[Ru]N([C@H]([C@H](C1=CC=CC=C1)N([H])CCCC2=CC=CC=C2)C3=CC=CC=C3)S(C4=CC=C(C)C=C4)(=O)=O	298	67	0.17	27.57	97
R13_18_Cat05_T298	O=C(C(CC(N1CCCCC1)=O)=O)NC2=CC=C(Cl)C=C2	Cl[Ru]N([C@H]([C@H](C1=CC=CC=C1)N([H])CCCC2=CC=CC=C2)C3=CC=CC=C3)S(C4=CC=C(C)C=C4)(=O)=O	298	67	0.17	27.57	97
R13_21_Cat05_T298	O=C(C(CC(N1CCCCC1)=O)=O)NC2CCCCC2	Cl[Ru]N([C@H]([C@H](C1=CC=CC=C1)N([H])CCCC2=CC=CC=C2)C3=CC=CC=C3)S(C4=CC=C(C)C=C4)(=O)=O	298	67	0.17	27.57	97
R13_28_Cat05_T298	O=C(C(CCCC)=O)NC1=C(C(C)C)C=CC=C1C(C)C	Cl[Ru]N([C@H]([C@H](C1=CC=CC=C1)N([H])CCCC2=CC=CC=C2)C3=CC=CC=C3)S(C4=CC=C(C)C=C4)(=O)=O	298	67	0.17	27.57	97
R14_11_Cat05_T298	O=C(C1=CC=C(N2CCCCC2)C=C1)C3(C4)CC4(C3)C5=CC=CC=C5	Cl[Ru]N([C@H]([C@H](C1=CC=CC=C1)N([H])CCCC2=CC=CC=C2)C3=CC=CC=C3)S(C4=CC=C(C)C=C4)(=O)=O	298	100	0.17	27.57	97
R14_19_Cat05_T298	O=C(C#CCCCCC)C1(C2)CC2(C1)C3=CC=CC=C3	Cl[Ru]N([C@H]([C@H](C1=CC=CC=C1)N([H])CCCC2=CC=CC=C2)C3=CC=CC=C3)S(C4=CC=C(C)C=C4)(=O)=O	298	100	0.17	27.57	97
R14_22_Cat05_T298	O=C(C#CC1=CC=CC=C1OC)C2(C3)CC3(C2)C4=CC=CC=C4	Cl[Ru]N([C@H]([C@H](C1=CC=CC=C1)N([H])CCCC2=CC=CC=C2)C3=CC=CC=C3)S(C4=CC=C(C)C=C4)(=O)=O	298	100	0.17	27.57	97
R17_05_Cat08_T298	O=C(C(OCC)OCC)/C=C(NC(C)=O)/C1=CC=C(C)C=C1	Cl[Rh]N([C@H]([C@H](C1=CC=CC=C1)N([H])CC(C=C(OC)C=C2)=C2C3C(C)=C(C)C(C)=C3C)C4=CC=CC=C4)S(C5=CC=C(C)C=C5)(=O)=O	298	100	0.17	27.57	97
R17_06_Cat08_T298	O=C(C(OCC)OCC)/C=C(NC(C)=O)/C1=CC=C(Br)C=C1	Cl[Rh]N([C@H]([C@H](C1=CC=CC=C1)N([H])CC(C=C(OC)C=C2)=C2C3C(C)=C(C)C(C)=C3C)C4=CC=CC=C4)S(C5=CC=C(C)C=C5)(=O)=O	298	100	0.17	27.57	97
R17_09_Cat08_T298	O=C(C1OCCCO1)/C=C(NC(C)=O)/C2=CC=C(Br)C=C2	Cl[Rh]N([C@H]([C@H](C1=CC=CC=C1)N([H])CC(C=C(OC)C=C2)=C2C3C(C)=C(C)C(C)=C3C)C4=CC=CC=C4)S(C5=CC=C(C)C=C5)(=O)=O	298	100	0.17	27.57	97
R17_19_Cat08_T298	O=C(C1OCCCO1)/C=C(NC(C)=O)/C2=CC=C(Br)C=C2	Cl[Rh]N([C@H]([C@H](C1=CC=CC=C1)N([H])CC(C=C(OC)C=C2)=C2C3C(C)=C(C)C(C)=C3C)C4=CC=CC=C4)S(C5=CC=C(C)C=C5)(=O)=O	298	100	0.17	27.57	97
R19_13_Cat09_T298	COC1=C(OC)C=C(C(C2=CC=C(Cl)C=C2)=NCC3)C3=C1	[H][Ru]N([C@H]([C@H](C1=CC=CC=C1)N([H])CC2=CC=CO2)C3=CC=CC=C3)S(C4=CC=C(C)C=C4)(=O)=O.C5=CC=CC=C5	298	100	0.17	27.57	97
R20_06_Cat12_T323	O=C1C(CC2=CC=CC=C2F)N3CCC1CC3	N[C@@H](C1=CC=CC=C1)[C@@H](N(S(=O)(C2=C(F)C(F)=C(F)C(F)=C2F)=O)[Ru]Cl)C3=CC=CC=C3.CC(C)C4=CC=C(C)C=C4	323	100	-0.14	72.3	97
R20_17_Cat12_T323	O=C1C(CC2=CC=CO2)N3CCC1CC3	N[C@@H](C1=CC=CC=C1)[C@@H](N(S(=O)(C2=C(F)C(F)=C(F)C(F)=C2F)=O)[Ru]Cl)C3=CC=CC=C3.CC(C)C4=CC=C(C)C=C4	323	100	-0.14	72.3	97
R22_10_Cat13_T333	O=C(C(C)(C)C)C1=CC=CC2=C1C=CC=C2	N[C@@H](C1=CC=CC=C1)[C@@H](N(S(=O)(N(CCC2=CC=C(C)C=C2)C)=O)[Ru]Cl)C3=CC=CC=C3	333	100	0.17	27.57	97
R22_01_Cat13_T313	CC(C1=C(O)C=CC2=C1C=CC=C2)=O	N[C@@H](C1=CC=CC=C1)[C@@H](N(S(=O)(N(CCC2=CC=C(C)C=C2)C)=O)[Ru]Cl)C3=CC=CC=C3	313	1000	0.17	27.57	97.2
R22_03_Cat13_T333	CC(C1=CC=C(F)C2=C1C=CC=C2)=O	N[C@@H](C1=CC=CC=C1)[C@@H](N(S(=O)(N(CCC2=CC=C(C)C=C2)C)=O)[Ru]Cl)C3=CC=CC=C3	333	1000	0.17	27.57	97.2
R22_06_Cat13_T333	CC(C1=CC=CC2=C1C=CC(OC)=C2)=O	N[C@@H](C1=CC=CC=C1)[C@@H](N(S(=O)(N(CCC2=CC=C(C)C=C2)C)=O)[Ru]Cl)C3=CC=CC=C3	333	1000	0.17	27.57	97.6
R07_05_Cat05_T300	O=C1C(N2C=C(C3CC3)N=N2)CCC4=CC=CC=C41	Cl[Ru]N([C@H]([C@H](C1=CC=CC=C1)N([H])CCCC2=CC=CC=C2)C3=CC=CC=C3)S(C4=CC=C(C)C=C4)(=O)=O	300	100	0.17	27.57	97.7
R22_03_Cat13_T313	CC(C1=CC=C(F)C2=C1C=CC=C2)=O	N[C@@H](C1=CC=CC=C1)[C@@H](N(S(=O)(N(CCC2=CC=C(C)C=C2)C)=O)[Ru]Cl)C3=CC=CC=C3	313	1000	0.17	27.57	97.8
R22_09_Cat13_T333	O=C(CC)C1=CC=CC2=C1C=CC=C2	N[C@@H](C1=CC=CC=C1)[C@@H](N(S(=O)(N(CCC2=CC=C(C)C=C2)C)=O)[Ru]Cl)C3=CC=CC=C3	333	1000	0.17	27.57	97.8
R01_01_Cat01_T301	CC(C1=CC=CC=C1)=O	N[C@@H](C1=CC=CC=C1)[C@@H](N([Ru]Cl)S(C2=CC=C(C)C=C2)(=O)=O)C3=CC=CC=C3.CC4=CC(C)=CC(C)=C4	301	200	0.17	27.57	98
R01_04_Cat01_T301	CC(C1=CC(OC)=CC=C1)=O	N[C@@H](C1=CC=CC=C1)[C@@H](N([Ru]Cl)S(C2=CC=C(C)C=C2)(=O)=O)C3=CC=CC=C3.CC4=CC(C)=CC(C)=C4	301	200	0.17	27.57	98
R01_11_Cat01_T301	CC(C1=CC=CS1)=O	N[C@@H](C1=CC=CC=C1)[C@@H](N([Ru]Cl)S(C2=CC=C(C)C=C2)(=O)=O)C3=CC=CC=C3.CC4=CC(C)=CC(C)=C4	301	200	0.17	27.57	98
R01_10_Cat01_T333	O=C1CCCC2=CC=CC=C21	N[C@@H](C1=CC=CC=C1)[C@@H](N([Ru]Cl)S(C2=CC=C(C)C=C2)(=O)=O)C3=CC=CC=C3.CC4=CC(C)=CC(C)=C4	333	200	0.17	27.57	98
R03_03_Cat04_T303	O=C(C(Cl)(Cl)C(OCC1=CC=CC=C1)=O)CC(C)C	N[C@@H](C1=CC=CC=C1)[C@@H](N([Ru]Cl)S(C2=CC=C(C)C=C2)(=O)=O)C3=CC=CC=C3.CC(C)C4=CC=C(C)C=C4	303	100	0.17	27.57	98
R03_10_Cat04_T303	O=C(C(Cl)(Cl)C(OC)=O)CCC1=C(Cl)C(OC)=C(OC)C(OC)=C1Cl	N[C@@H](C1=CC=CC=C1)[C@@H](N([Ru]Cl)S(C2=CC=C(C)C=C2)(=O)=O)C3=CC=CC=C3.CC(C)C4=CC=C(C)C=C4	303	100	0.17	27.57	98
R03_13_Cat04_T303	O=C(C(F)(F)C(OCC)=O)C1=CC=C(CCCCC)C=C1	N[C@@H](C1=CC=CC=C1)[C@@H](N([Ru]Cl)S(C2=CC=C(C)C=C2)(=O)=O)C3=CC=CC=C3.CC(C)C4=CC=C(C)C=C4	303	100	0.17	27.57	98
R03_14_Cat04_T303	O=C(C(F)(F)C(OCC)=O)CCC1=CC=CC=C1	N[C@@H](C1=CC=CC=C1)[C@@H](N([Ru]Cl)S(C2=CC=C(C)C=C2)(=O)=O)C3=CC=CC=C3.CC(C)C4=CC=C(C)C=C4	303	100	0.17	27.57	98
R03_16_Cat04_T303	CC(C(Cl)(Cl)C(N(CC=C)CC1=CC=CC=C1)=O)=O	N[C@@H](C1=CC=CC=C1)[C@@H](N([Ru]Cl)S(C2=CC=C(C)C=C2)(=O)=O)C3=CC=CC=C3.CC(C)C4=CC=C(C)C=C4	303	100	0.17	27.57	98
R06_01_Cat06_T333	O=C(C1=CC=CC=C1)C2=C(C)C=CC=C2	Cl[Ru]N([C@H]([C@H](C1=CC=CC=C1)N([H])CCOCC2=CC=C(C)C=C2)C3=CC=CC=C3)S(C4=CC=C(C)C=C4)(=O)=O	333	100	0.17	27.57	98
R06_02_Cat06_T313	O=C(C1=CC=CC=C1)C2=C(Cl)C=CC=C2	Cl[Ru]N([C@H]([C@H](C1=CC=CC=C1)N([H])CCOCC2=CC=C(C)C=C2)C3=CC=CC=C3)S(C4=CC=C(C)C=C4)(=O)=O	313	100	0.17	27.57	98
R06_06_Cat06_T333	O=C(C1=CC=CC=C1)C2=C(C)C=C(C(C)C)C=C2	Cl[Ru]N([C@H]([C@H](C1=CC=CC=C1)N([H])CCOCC2=CC=C(C)C=C2)C3=CC=CC=C3)S(C4=CC=C(C)C=C4)(=O)=O	333	100	0.17	27.57	98
R09_01_Cat09_T298	O=C(CC1=NC=CC=C1)C2=CC=CC=C2	[H][Ru]N([C@H]([C@H](C1=CC=CC=C1)N([H])CC2=CC=CO2)C3=CC=CC=C3)S(C4=CC=C(C)C=C4)(=O)=O.C5=CC=CC=C5	298	100	0.17	27.57	98
R12_10_Cat08_T323	O=C(C1=CC=CC=C1OC/2)C2=C\C3=CC(C=CC=C4)=C4C=C3	Cl[Rh]N([C@H]([C@H](C1=CC=CC=C1)N([H])CC(C=C(OC)C=C2)=C2C3C(C)=C(C)C(C)=C3C)C4=CC=CC=C4)S(C5=CC=C(C)C=C5)(=O)=O	323	200	-0.327467	27.0267	98
R13_19_Cat05_T298	O=C(C(CC(N1CCCCC1)=O)=O)NC2=CC=CC=C2Cl	Cl[Ru]N([C@H]([C@H](C1=CC=CC=C1)N([H])CCCC2=CC=CC=C2)C3=CC=CC=C3)S(C4=CC=C(C)C=C4)(=O)=O	298	67	0.17	27.57	98
R13_23_Cat05_T298	O=C(C(CC(N1CCCCC1)=O)=O)NC2CC2	Cl[Ru]N([C@H]([C@H](C1=CC=CC=C1)N([H])CCCC2=CC=CC=C2)C3=CC=CC=C3)S(C4=CC=C(C)C=C4)(=O)=O	298	67	0.17	27.57	98
R13_25_Cat05_T298	O=C(C(CC(N1CCCCC1)=O)=O)OCC	Cl[Ru]N([C@H]([C@H](C1=CC=CC=C1)N([H])CCCC2=CC=CC=C2)C3=CC=CC=C3)S(C4=CC=C(C)C=C4)(=O)=O	298	67	0.17	27.57	98
R13_26_Cat05_T298	O=C(C(CC(OCC)=O)=O)NC1=C(C(C)C)C=CC=C1C(C)C	Cl[Ru]N([C@H]([C@H](C1=CC=CC=C1)N([H])CCCC2=CC=CC=C2)C3=CC=CC=C3)S(C4=CC=C(C)C=C4)(=O)=O	298	67	0.17	27.57	98
R14_07_Cat05_T298	O=C(C1=CC=C(OC)C=C1)C2(C3)CC3(C2)C4=CC=CC=C4	Cl[Ru]N([C@H]([C@H](C1=CC=CC=C1)N([H])CCCC2=CC=CC=C2)C3=CC=CC=C3)S(C4=CC=C(C)C=C4)(=O)=O	298	100	0.17	27.57	98
R17_10_Cat08_T298	O=C(C1OCCCO1)/C=C(NC(C)=O)/C2=CC=C(OC)C=C2	Cl[Rh]N([C@H]([C@H](C1=CC=CC=C1)N([H])CC(C=C(OC)C=C2)=C2C3C(C)=C(C)C(C)=C3C)C4=CC=CC=C4)S(C5=CC=C(C)C=C5)(=O)=O	298	100	0.17	27.57	98
R17_13_Cat08_T298	O=C(C1OCCCO1)/C=C(NC(C)=O)/C2=CC(OCO3)=C3C=C2	Cl[Rh]N([C@H]([C@H](C1=CC=CC=C1)N([H])CC(C=C(OC)C=C2)=C2C3C(C)=C(C)C(C)=C3C)C4=CC=CC=C4)S(C5=CC=C(C)C=C5)(=O)=O	298	100	0.17	27.57	98
R17_15_Cat08_T298	O=C(C1OCCCO1)/C=C(NC(C)=O)/C2=CC(C)=CC=C2	Cl[Rh]N([C@H]([C@H](C1=CC=CC=C1)N([H])CC(C=C(OC)C=C2)=C2C3C(C)=C(C)C(C)=C3C)C4=CC=CC=C4)S(C5=CC=C(C)C=C5)(=O)=O	298	100	0.17	27.57	98
R17_17_Cat08_T298	O=C(C1OCCCO1)/C=C(NC(C)=O)/C2=CC(C=CC=C3)=C3C=C2	Cl[Rh]N([C@H]([C@H](C1=CC=CC=C1)N([H])CC(C=C(OC)C=C2)=C2C3C(C)=C(C)C(C)=C3C)C4=CC=CC=C4)S(C5=CC=C(C)C=C5)(=O)=O	298	100	0.17	27.57	98
R17_24_Cat08_T298	O=C(C1OCCCO1)/C=C(NC(C)=O)/C2=CC=C(Cl)O2	Cl[Rh]N([C@H]([C@H](C1=CC=CC=C1)N([H])CC(C=C(OC)C=C2)=C2C3C(C)=C(C)C(C)=C3C)C4=CC=CC=C4)S(C5=CC=C(C)C=C5)(=O)=O	298	100	0.17	27.57	98
R20_07_Cat12_T323	O=C1C(CC2=CC=CC(F)=C2)N3CCC1CC3	N[C@@H](C1=CC=CC=C1)[C@@H](N(S(=O)(C2=C(F)C(F)=C(F)C(F)=C2F)=O)[Ru]Cl)C3=CC=CC=C3.CC(C)C4=CC=C(C)C=C4	323	100	-0.14	72.3	98
R20_10_Cat12_T323	O=C1C(CC2=CC=C(C(F)(F)F)C=C2)N3CCC1CC3	N[C@@H](C1=CC=CC=C1)[C@@H](N(S(=O)(C2=C(F)C(F)=C(F)C(F)=C2F)=O)[Ru]Cl)C3=CC=CC=C3.CC(C)C4=CC=C(C)C=C4	323	100	-0.14	72.3	98
R20_15_Cat12_T323	O=C1C(CC2=CC(OCO3)=C3C=C2)N4CCC1CC4	N[C@@H](C1=CC=CC=C1)[C@@H](N(S(=O)(C2=C(F)C(F)=C(F)C(F)=C2F)=O)[Ru]Cl)C3=CC=CC=C3.CC(C)C4=CC=C(C)C=C4	323	100	-0.14	72.3	98
R21_05_Cat08_T298	O=C(C(CC1=CC=CC=C1)C#N)C2=CC=CC=C2	Cl[Rh]N([C@H]([C@H](C1=CC=CC=C1)N([H])CC(C=C(OC)C=C2)=C2C3C(C)=C(C)C(C)=C3C)C4=CC=CC=C4)S(C5=CC=C(C)C=C5)(=O)=O	298	100	0.17	27.57	98
R22_08_Cat13_T333	CC(C1=CC(C=CC=C2)=C2C3=C1C=CC=C3)=O	N[C@@H](C1=CC=CC=C1)[C@@H](N(S(=O)(N(CCC2=CC=C(C)C=C2)C)=O)[Ru]Cl)C3=CC=CC=C3	333	1000	0.17	27.57	98.1
R22_12_Cat13_T333	CC(C=CC=C1)=C1C(C(CC(OC)=O)=O)=C	N[C@@H](C1=CC=CC=C1)[C@@H](N(S(=O)(N(CCC2=CC=C(C)C=C2)C)=O)[Ru]Cl)C3=CC=CC=C3	333	1000	0.17	27.57	98.1
R22_12_Cat13_T313	CC(C=CC=C1)=C1C(C(CC(OC)=O)=O)=C	N[C@@H](C1=CC=CC=C1)[C@@H](N(S(=O)(N(CCC2=CC=C(C)C=C2)C)=O)[Ru]Cl)C3=CC=CC=C3	313	1000	0.17	27.57	98.2
R22_04_Cat13_T333	CC(C1=CC=C(C)C2=C1C=CC=C2)=O	N[C@@H](C1=CC=CC=C1)[C@@H](N(S(=O)(N(CCC2=CC=C(C)C=C2)C)=O)[Ru]Cl)C3=CC=CC=C3	333	1000	0.17	27.57	98.4
R03_09_Cat04_T303	O=C(C(Cl)(Cl)C(OC)=O)CCCC#C	N[C@@H](C1=CC=CC=C1)[C@@H](N([Ru]Cl)S(C2=CC=C(C)C=C2)(=O)=O)C3=CC=CC=C3.CC(C)C4=CC=C(C)C=C4	303	100	0.17	27.57	98.5
R03_15_Cat04_T303	CC(C(Cl)(Cl)C(NC1=CC=CC=C1)=O)=O	N[C@@H](C1=CC=CC=C1)[C@@H](N([Ru]Cl)S(C2=CC=C(C)C=C2)(=O)=O)C3=CC=CC=C3.CC(C)C4=CC=C(C)C=C4	303	100	0.17	27.57	98.5
R22_11_Cat13_T333	O=C(CC1=CC=CC=C1)C2=CC=CC3=C2C=CC=C3	N[C@@H](C1=CC=CC=C1)[C@@H](N(S(=O)(N(CCC2=CC=C(C)C=C2)C)=O)[Ru]Cl)C3=CC=CC=C3	333	1000	0.17	27.57	98.5
R05_13_Cat07_T333	O=C1C(C(OC)=O)CCCC2=CC=CC=C21	Cl[Ru]N([C@H]([C@H](C1=CC=CC=C1)N([H])CCOCC2=CC=C(C)C=C2)C3=CC=CC=C3)S(C)(=O)=O	333	200	0.17	27.57	98.9
R01_09_Cat01_T301	O=C1CCC2=CC=CC=C21	N[C@@H](C1=CC=CC=C1)[C@@H](N([Ru]Cl)S(C2=CC=C(C)C=C2)(=O)=O)C3=CC=CC=C3.CC4=CC(C)=CC(C)=C4	301	200	0.17	27.57	99
R01_10_Cat01_T301	O=C1CCCC2=CC=CC=C21	N[C@@H](C1=CC=CC=C1)[C@@H](N([Ru]Cl)S(C2=CC=C(C)C=C2)(=O)=O)C3=CC=CC=C3.CC4=CC(C)=CC(C)=C4	301	200	0.17	27.57	99
R03_01_Cat04_T303	CC(C(Cl)(Cl)C(OCC1=CC=CC=C1)=O)=O	N[C@@H](C1=CC=CC=C1)[C@@H](N([Ru]Cl)S(C2=CC=C(C)C=C2)(=O)=O)C3=CC=CC=C3.CC(C)C4=CC=C(C)C=C4	303	100	0.17	27.57	99
R03_02_Cat04_T303	O=C(C(Cl)(Cl)C(OCC1=CC=CC=C1)=O)CCCC	N[C@@H](C1=CC=CC=C1)[C@@H](N([Ru]Cl)S(C2=CC=C(C)C=C2)(=O)=O)C3=CC=CC=C3.CC(C)C4=CC=C(C)C=C4	303	100	0.17	27.57	99
R03_04_Cat04_T303	O=C(C(Cl)(Cl)C(OCC1=CC=CC=C1)=O)CCCCCCCCCCCCCC	N[C@@H](C1=CC=CC=C1)[C@@H](N([Ru]Cl)S(C2=CC=C(C)C=C2)(=O)=O)C3=CC=CC=C3.CC(C)C4=CC=C(C)C=C4	303	100	0.17	27.57	99
R03_05_Cat04_T303	CC(C(Cl)(Cl)C(OC(C)(C)C)=O)=O	N[C@@H](C1=CC=CC=C1)[C@@H](N([Ru]Cl)S(C2=CC=C(C)C=C2)(=O)=O)C3=CC=CC=C3.CC(C)C4=CC=C(C)C=C4	303	100	0.17	27.57	99
R03_06_Cat04_T303	CC(C(Cl)(Cl)C(OCC=C)=O)=O	N[C@@H](C1=CC=CC=C1)[C@@H](N([Ru]Cl)S(C2=CC=C(C)C=C2)(=O)=O)C3=CC=CC=C3.CC(C)C4=CC=C(C)C=C4	303	100	0.17	27.57	99
R03_07_Cat04_T303	O=C(C(Cl)(Cl)C(OCC=C)=O)CCC1=CC=CC=C1	N[C@@H](C1=CC=CC=C1)[C@@H](N([Ru]Cl)S(C2=CC=C(C)C=C2)(=O)=O)C3=CC=CC=C3.CC(C)C4=CC=C(C)C=C4	303	100	0.17	27.57	99
R03_08_Cat04_T303	O=C(C(Cl)(Cl)C(OCC)=O)CCC	N[C@@H](C1=CC=CC=C1)[C@@H](N([Ru]Cl)S(C2=CC=C(C)C=C2)(=O)=O)C3=CC=CC=C3.CC(C)C4=CC=C(C)C=C4	303	100	0.17	27.57	99
R06_03_Cat06_T333	O=C(C1=CC=CC=C1)C2=C(Br)C=CC=C2	Cl[Ru]N([C@H]([C@H](C1=CC=CC=C1)N([H])CCOCC2=CC=C(C)C=C2)C3=CC=CC=C3)S(C4=CC=C(C)C=C4)(=O)=O	333	100	0.17	27.57	99
R06_04_Cat06_T333	O=C(C1=CC=CC=C1)C2=C(C(F)(F)F)C=CC=C2	Cl[Ru]N([C@H]([C@H](C1=CC=CC=C1)N([H])CCOCC2=CC=C(C)C=C2)C3=CC=CC=C3)S(C4=CC=C(C)C=C4)(=O)=O	333	100	0.17	27.57	99
R06_07_Cat06_T303	O=C(C1=CC=CC=C1)C2=C(Cl)C=C(Cl)C=C2	Cl[Ru]N([C@H]([C@H](C1=CC=CC=C1)N([H])CCOCC2=CC=C(C)C=C2)C3=CC=CC=C3)S(C4=CC=C(C)C=C4)(=O)=O	303	100	0.17	27.57	99
R06_08_Cat06_T313	O=C(C1=CC=CC=C1)C2=C(Cl)C=CC([N+]([O-])=O)=C2	Cl[Ru]N([C@H]([C@H](C1=CC=CC=C1)N([H])CCOCC2=CC=C(C)C=C2)C3=CC=CC=C3)S(C4=CC=C(C)C=C4)(=O)=O	313	100	0.17	27.57	99
R06_11_Cat06_T333	O=C(C1=CC=CC=C1)C2=C(F)C(F)=C(F)C(F)=C2F	Cl[Ru]N([C@H]([C@H](C1=CC=CC=C1)N([H])CCOCC2=CC=C(C)C=C2)C3=CC=CC=C3)S(C4=CC=C(C)C=C4)(=O)=O	333	100	0.17	27.57	99
R06_20_Cat06_T303	O=C(C1=CC=CC=C1)C2=CC([N+]([O-])=O)=CC([N+]([O-])=O)=C2	Cl[Ru]N([C@H]([C@H](C1=CC=CC=C1)N([H])CCOCC2=CC=C(C)C=C2)C3=CC=CC=C3)S(C4=CC=C(C)C=C4)(=O)=O	303	100	0.17	27.57	99
R06_25_Cat06_T303	O=C(C1=CC=C(OC)C=C1)C2=CC([N+]([O-])=O)=CC([N+]([O-])=O)=C2	Cl[Ru]N([C@H]([C@H](C1=CC=CC=C1)N([H])CCOCC2=CC=C(C)C=C2)C3=CC=CC=C3)S(C4=CC=C(C)C=C4)(=O)=O	303	100	0.17	27.57	99
R8_01_Cat08_T303	O=C1CCN(C(OC(C)(C)C)=O)C2=CC=CC=C21	Cl[Rh]N([C@H]([C@H](C1=CC=CC=C1)N([H])CC(C=C(OC)C=C2)=C2C3C(C)=C(C)C(C)=C3C)C4=CC=CC=C4)S(C5=CC=C(C)C=C5)(=O)=O	303	100	0.17	27.57	99
R8_02_Cat08_T303	O=C1CCN(C(OC(C)(C)C)=O)C2=CC=C(C)C=C21	Cl[Rh]N([C@H]([C@H](C1=CC=CC=C1)N([H])CC(C=C(OC)C=C2)=C2C3C(C)=C(C)C(C)=C3C)C4=CC=CC=C4)S(C5=CC=C(C)C=C5)(=O)=O	303	100	0.17	27.57	99
R8_03_Cat08_T303	O=C1CCN(C(OC(C)(C)C)=O)C2=CC=C(OC)C=C21	Cl[Rh]N([C@H]([C@H](C1=CC=CC=C1)N([H])CC(C=C(OC)C=C2)=C2C3C(C)=C(C)C(C)=C3C)C4=CC=CC=C4)S(C5=CC=C(C)C=C5)(=O)=O	303	100	0.17	27.57	99
R8_04_Cat08_T303	O=C1CCN(C(OC(C)(C)C)=O)C2=CC(OC)=CC=C21	Cl[Rh]N([C@H]([C@H](C1=CC=CC=C1)N([H])CC(C=C(OC)C=C2)=C2C3C(C)=C(C)C(C)=C3C)C4=CC=CC=C4)S(C5=CC=C(C)C=C5)(=O)=O	303	100	0.17	27.57	99
R8_06_Cat08_T303	O=C1CCN(C(OC(C)(C)C)=O)C2=CC=C(Br)C=C21	Cl[Rh]N([C@H]([C@H](C1=CC=CC=C1)N([H])CC(C=C(OC)C=C2)=C2C3C(C)=C(C)C(C)=C3C)C4=CC=CC=C4)S(C5=CC=C(C)C=C5)(=O)=O	303	100	0.17	27.57	99
R8_07_Cat08_T303	O=C1CCN(C(OC(C)(C)C)=O)C2=CC(Br)=CC=C21	Cl[Rh]N([C@H]([C@H](C1=CC=CC=C1)N([H])CC(C=C(OC)C=C2)=C2C3C(C)=C(C)C(C)=C3C)C4=CC=CC=C4)S(C5=CC=C(C)C=C5)(=O)=O	303	100	0.17	27.57	99
R8_08_Cat08_T303	O=C1CCN(C(OC(C)(C)C)=O)C2=CC=C(Cl)C=C21	Cl[Rh]N([C@H]([C@H](C1=CC=CC=C1)N([H])CC(C=C(OC)C=C2)=C2C3C(C)=C(C)C(C)=C3C)C4=CC=CC=C4)S(C5=CC=C(C)C=C5)(=O)=O	303	100	0.17	27.57	99
R8_09_Cat08_T303	O=C1CCN(C(OC(C)(C)C)=O)C2=CC(Cl)=CC=C21	Cl[Rh]N([C@H]([C@H](C1=CC=CC=C1)N([H])CC(C=C(OC)C=C2)=C2C3C(C)=C(C)C(C)=C3C)C4=CC=CC=C4)S(C5=CC=C(C)C=C5)(=O)=O	303	100	0.17	27.57	99
R8_10_Cat08_T303	O=C1CCN(C(OC(C)(C)C)=O)C2=CC=C(F)C=C21	Cl[Rh]N([C@H]([C@H](C1=CC=CC=C1)N([H])CC(C=C(OC)C=C2)=C2C3C(C)=C(C)C(C)=C3C)C4=CC=CC=C4)S(C5=CC=C(C)C=C5)(=O)=O	303	100	0.17	27.57	99
R8_11_Cat08_T303	O=C1CCN(C(OC(C)(C)C)=O)C2=CC=C(C(F)(F)F)C=C21	Cl[Rh]N([C@H]([C@H](C1=CC=CC=C1)N([H])CC(C=C(OC)C=C2)=C2C3C(C)=C(C)C(C)=C3C)C4=CC=CC=C4)S(C5=CC=C(C)C=C5)(=O)=O	303	100	0.17	27.57	99
R8_12_Cat08_T303	O=C1CCN(C(OC(C)(C)C)=O)C2=CC(C(F)(F)F)=CC=C21	Cl[Rh]N([C@H]([C@H](C1=CC=CC=C1)N([H])CC(C=C(OC)C=C2)=C2C3C(C)=C(C)C(C)=C3C)C4=CC=CC=C4)S(C5=CC=C(C)C=C5)(=O)=O	303	100	0.17	27.57	99
R12_01_Cat08_T323	O=C(C1=CC=CC=C1OC/2)C2=C\C3=CC=C(OC)C=C3	Cl[Rh]N([C@H]([C@H](C1=CC=CC=C1)N([H])CC(C=C(OC)C=C2)=C2C3C(C)=C(C)C(C)=C3C)C4=CC=CC=C4)S(C5=CC=C(C)C=C5)(=O)=O	323	200	-0.327467	27.0267	99
R12_02_Cat08_T323	O=C(C1=CC=CC=C1OC/2)C2=C\C3=CC(OC)=CC=C3	Cl[Rh]N([C@H]([C@H](C1=CC=CC=C1)N([H])CC(C=C(OC)C=C2)=C2C3C(C)=C(C)C(C)=C3C)C4=CC=CC=C4)S(C5=CC=C(C)C=C5)(=O)=O	323	200	-0.327467	27.0267	99
R12_04_Cat08_T323	O=C(C1=CC=CC=C1OC/2)C2=C\C3=CC=C(C)C=C3	Cl[Rh]N([C@H]([C@H](C1=CC=CC=C1)N([H])CC(C=C(OC)C=C2)=C2C3C(C)=C(C)C(C)=C3C)C4=CC=CC=C4)S(C5=CC=C(C)C=C5)(=O)=O	323	200	-0.327467	27.0267	99
R12_05_Cat08_T323	O=C(C1=CC=CC=C1OC/2)C2=C\C3=CC=C(F)C=C3	Cl[Rh]N([C@H]([C@H](C1=CC=CC=C1)N([H])CC(C=C(OC)C=C2)=C2C3C(C)=C(C)C(C)=C3C)C4=CC=CC=C4)S(C5=CC=C(C)C=C5)(=O)=O	323	200	-0.327467	27.0267	99
R12_06_Cat08_T323	O=C(C1=CC=CC=C1OC/2)C2=C\C3=CC=C(C(F)(F)F)C=C3	Cl[Rh]N([C@H]([C@H](C1=CC=CC=C1)N([H])CC(C=C(OC)C=C2)=C2C3C(C)=C(C)C(C)=C3C)C4=CC=CC=C4)S(C5=CC=C(C)C=C5)(=O)=O	323	200	-0.327467	27.0267	99
R12_07_Cat08_T323	O=C(C1=CC=CC=C1OC/2)C2=C\C3=CC(Br)=CC=C3	Cl[Rh]N([C@H]([C@H](C1=CC=CC=C1)N([H])CC(C=C(OC)C=C2)=C2C3C(C)=C(C)C(C)=C3C)C4=CC=CC=C4)S(C5=CC=C(C)C=C5)(=O)=O	323	200	-0.327467	27.0267	99
R12_08_Cat08_T323	O=C(C1=CC=CC=C1OC/2)C2=C\C3=CC=C([N+]([O-])=O)C=C3	Cl[Rh]N([C@H]([C@H](C1=CC=CC=C1)N([H])CC(C=C(OC)C=C2)=C2C3C(C)=C(C)C(C)=C3C)C4=CC=CC=C4)S(C5=CC=C(C)C=C5)(=O)=O	323	200	-0.327467	27.0267	99
R12_09_Cat08_T323	O=C(C1=CC=CC=C1OC/2)C2=C\C3=CC(OC)=C(O)C=C3	Cl[Rh]N([C@H]([C@H](C1=CC=CC=C1)N([H])CC(C=C(OC)C=C2)=C2C3C(C)=C(C)C(C)=C3C)C4=CC=CC=C4)S(C5=CC=C(C)C=C5)(=O)=O	323	200	-0.327467	27.0267	99
R12_11_Cat08_T323	O=C(C1=CC=CC=C1OC/2)C2=C\C3=CC=CO3	Cl[Rh]N([C@H]([C@H](C1=CC=CC=C1)N([H])CC(C=C(OC)C=C2)=C2C3C(C)=C(C)C(C)=C3C)C4=CC=CC=C4)S(C5=CC=C(C)C=C5)(=O)=O	323	200	-0.327467	27.0267	99
R12_12_Cat08_T323	O=C(C1=CC=CC=C1OC/2)C2=C\C3=CC=C(C4=CC=CC=C4)C=C3	Cl[Rh]N([C@H]([C@H](C1=CC=CC=C1)N([H])CC(C=C(OC)C=C2)=C2C3C(C)=C(C)C(C)=C3C)C4=CC=CC=C4)S(C5=CC=C(C)C=C5)(=O)=O	323	200	-0.327467	27.0267	99
R12_13_Cat08_T323	O=C(C1=CC=CC=C1OC/2)C2=C\C=C(C)\CC/C=C(C)/C	Cl[Rh]N([C@H]([C@H](C1=CC=CC=C1)N([H])CC(C=C(OC)C=C2)=C2C3C(C)=C(C)C(C)=C3C)C4=CC=CC=C4)S(C5=CC=C(C)C=C5)(=O)=O	323	200	-0.327467	27.0267	99
R13_20_Cat05_T298	O=C(C(CC(N1CCCCC1)=O)=O)NC2=C(C(C)C)C=CC=C2C(C)C	Cl[Ru]N([C@H]([C@H](C1=CC=CC=C1)N([H])CCCC2=CC=CC=C2)C3=CC=CC=C3)S(C4=CC=C(C)C=C4)(=O)=O	298	67	0.17	27.57	99
R14_01_Cat05_T298	CC(C=C1)=CC=C1C(C2(C3)CC3(C2)C4=CC=CC=C4)=O	Cl[Ru]N([C@H]([C@H](C1=CC=CC=C1)N([H])CCCC2=CC=CC=C2)C3=CC=CC=C3)S(C4=CC=C(C)C=C4)(=O)=O	298	100	0.17	27.57	99
R14_03_Cat05_T298	O=C(C1=CC=C(C(C)(C)C)C=C1)C2(C3)CC3(C2)C4=CC=CC=C4	Cl[Ru]N([C@H]([C@H](C1=CC=CC=C1)N([H])CCCC2=CC=CC=C2)C3=CC=CC=C3)S(C4=CC=C(C)C=C4)(=O)=O	298	100	0.17	27.57	99
R14_04_Cat05_T298	O=C(C1=CC=C(C(C)C)C=C1)C2(C3)CC3(C2)C4=CC=CC=C4	Cl[Ru]N([C@H]([C@H](C1=CC=CC=C1)N([H])CCCC2=CC=CC=C2)C3=CC=CC=C3)S(C4=CC=C(C)C=C4)(=O)=O	298	100	0.17	27.57	99
R14_13_Cat05_T298	O=C(C1=CC=CO1)C2(C3)CC3(C2)C4=CC=CC=C4	Cl[Ru]N([C@H]([C@H](C1=CC=CC=C1)N([H])CCCC2=CC=CC=C2)C3=CC=CC=C3)S(C4=CC=C(C)C=C4)(=O)=O	298	100	0.17	27.57	99
R14_14_Cat05_T298	O=C(C1=CC=CS1)C2(C3)CC3(C2)C4=CC=CC=C4	Cl[Ru]N([C@H]([C@H](C1=CC=CC=C1)N([H])CCCC2=CC=CC=C2)C3=CC=CC=C3)S(C4=CC=C(C)C=C4)(=O)=O	298	100	0.17	27.57	99
R14_20_Cat05_T298	O=C(C#C[Si](C)(C)C)C1(C2)CC2(C1)C3=CC=CC=C3	Cl[Ru]N([C@H]([C@H](C1=CC=CC=C1)N([H])CCCC2=CC=CC=C2)C3=CC=CC=C3)S(C4=CC=C(C)C=C4)(=O)=O	298	100	0.17	27.57	99
R15_01_Cat08_T273	O=C(C(NC(C1=CC=CC=C1)=O)C(OC)=O)C2=CC=CC=C2	Cl[Rh]N([C@H]([C@H](C1=CC=CC=C1)N([H])CC(C=C(OC)C=C2)=C2C3C(C)=C(C)C(C)=C3C)C4=CC=CC=C4)S(C5=CC=C(C)C=C5)(=O)=O	273	200	0.17	27.57	99
R15_02_Cat08_T273	O=C(C(NC(C1=CC=CC=C1)=O)C(OC)=O)C2=CC(C)=CC=C2	Cl[Rh]N([C@H]([C@H](C1=CC=CC=C1)N([H])CC(C=C(OC)C=C2)=C2C3C(C)=C(C)C(C)=C3C)C4=CC=CC=C4)S(C5=CC=C(C)C=C5)(=O)=O	273	200	0.17	27.57	99
R15_03_Cat08_T273	O=C(C(NC(C1=CC=CC=C1)=O)C(OC)=O)C2=CC=C(C)C=C2	Cl[Rh]N([C@H]([C@H](C1=CC=CC=C1)N([H])CC(C=C(OC)C=C2)=C2C3C(C)=C(C)C(C)=C3C)C4=CC=CC=C4)S(C5=CC=C(C)C=C5)(=O)=O	273	200	0.17	27.57	99
R15_04_Cat08_T273	O=C(C(NC(C1=CC=CC=C1)=O)C(OC)=O)C2=CC(C=CC=C3)=C3C=C2	Cl[Rh]N([C@H]([C@H](C1=CC=CC=C1)N([H])CC(C=C(OC)C=C2)=C2C3C(C)=C(C)C(C)=C3C)C4=CC=CC=C4)S(C5=CC=C(C)C=C5)(=O)=O	273	200	0.17	27.57	99
R15_05_Cat08_T273	O=C(C(NC(C1=CC=CC=C1)=O)C(OC)=O)C2=CC=C(OC)C=C2	Cl[Rh]N([C@H]([C@H](C1=CC=CC=C1)N([H])CC(C=C(OC)C=C2)=C2C3C(C)=C(C)C(C)=C3C)C4=CC=CC=C4)S(C5=CC=C(C)C=C5)(=O)=O	273	200	0.17	27.57	99
R15_06_Cat08_T273	O=C(C(NC(C1=CC=CC=C1)=O)C(OC)=O)C2=CC(OCO3)=C3C=C2	Cl[Rh]N([C@H]([C@H](C1=CC=CC=C1)N([H])CC(C=C(OC)C=C2)=C2C3C(C)=C(C)C(C)=C3C)C4=CC=CC=C4)S(C5=CC=C(C)C=C5)(=O)=O	273	200	0.17	27.57	99
R15_07_Cat08_T273	O=C(C(NC(C1=CC=CC=C1)=O)C(OC)=O)C2=CC=C(F)C=C2	Cl[Rh]N([C@H]([C@H](C1=CC=CC=C1)N([H])CC(C=C(OC)C=C2)=C2C3C(C)=C(C)C(C)=C3C)C4=CC=CC=C4)S(C5=CC=C(C)C=C5)(=O)=O	273	200	0.17	27.57	99
R15_08_Cat08_T273	O=C(C(NC(C1=CC=CC=C1)=O)C(OC)=O)C2=CC=C(Cl)C=C2	Cl[Rh]N([C@H]([C@H](C1=CC=CC=C1)N([H])CC(C=C(OC)C=C2)=C2C3C(C)=C(C)C(C)=C3C)C4=CC=CC=C4)S(C5=CC=C(C)C=C5)(=O)=O	273	200	0.17	27.57	99
R15_09_Cat08_T273	O=C(C(NC(C1=CC=CC=C1)=O)C(OC)=O)C2=CC=C(Br)C=C2	Cl[Rh]N([C@H]([C@H](C1=CC=CC=C1)N([H])CC(C=C(OC)C=C2)=C2C3C(C)=C(C)C(C)=C3C)C4=CC=CC=C4)S(C5=CC=C(C)C=C5)(=O)=O	273	200	0.17	27.57	99
R15_10_Cat08_T273	O=C(C(NC(C1=CC=CC=C1)=O)C(OC)=O)C2=C(C)C=CC=C2	Cl[Rh]N([C@H]([C@H](C1=CC=CC=C1)N([H])CC(C=C(OC)C=C2)=C2C3C(C)=C(C)C(C)=C3C)C4=CC=CC=C4)S(C5=CC=C(C)C=C5)(=O)=O	273	200	0.17	27.57	99
R15_11_Cat08_T273	O=C(C(NC(C1=CC=CC=C1)=O)C(OC)=O)C2=NC=CC=C2	Cl[Rh]N([C@H]([C@H](C1=CC=CC=C1)N([H])CC(C=C(OC)C=C2)=C2C3C(C)=C(C)C(C)=C3C)C4=CC=CC=C4)S(C5=CC=C(C)C=C5)(=O)=O	273	200	0.17	27.57	99
R15_12_Cat08_T273	O=C(C(NC(C1=CC=CC=C1)=O)C(OC)=O)C2=CN=CC=C2	Cl[Rh]N([C@H]([C@H](C1=CC=CC=C1)N([H])CC(C=C(OC)C=C2)=C2C3C(C)=C(C)C(C)=C3C)C4=CC=CC=C4)S(C5=CC=C(C)C=C5)(=O)=O	273	200	0.17	27.57	99
R15_13_Cat08_T273	O=C(C(NC(C1=CC=CC=C1)=O)C(OC)=O)C2=NC(C=CC=C3)=C3C=C2	Cl[Rh]N([C@H]([C@H](C1=CC=CC=C1)N([H])CC(C=C(OC)C=C2)=C2C3C(C)=C(C)C(C)=C3C)C4=CC=CC=C4)S(C5=CC=C(C)C=C5)(=O)=O	273	200	0.17	27.57	99
R15_14_Cat08_T273	O=C(C(NC(C1=CC=CC=C1)=O)C(OC)=O)C2=CC=CO2	Cl[Rh]N([C@H]([C@H](C1=CC=CC=C1)N([H])CC(C=C(OC)C=C2)=C2C3C(C)=C(C)C(C)=C3C)C4=CC=CC=C4)S(C5=CC=C(C)C=C5)(=O)=O	273	200	0.17	27.57	99
R15_16_Cat08_T273	O=C(C(NC(C1=CC=CC=C1)=O)C(OC)=O)CCCCC	Cl[Rh]N([C@H]([C@H](C1=CC=CC=C1)N([H])CC(C=C(OC)C=C2)=C2C3C(C)=C(C)C(C)=C3C)C4=CC=CC=C4)S(C5=CC=C(C)C=C5)(=O)=O	273	200	0.17	27.57	99
R15_17_Cat08_T273	O=C(C(NC(C1=CC=CC=C1)=O)C(OC)=O)CCC2=CC=CC=C2	Cl[Rh]N([C@H]([C@H](C1=CC=CC=C1)N([H])CC(C=C(OC)C=C2)=C2C3C(C)=C(C)C(C)=C3C)C4=CC=CC=C4)S(C5=CC=C(C)C=C5)(=O)=O	273	200	0.17	27.57	99
R15_18_Cat08_T273	O=C(C(NC(C1=CC=CC=C1)=O)C(OC)=O)C(C)C	Cl[Rh]N([C@H]([C@H](C1=CC=CC=C1)N([H])CC(C=C(OC)C=C2)=C2C3C(C)=C(C)C(C)=C3C)C4=CC=CC=C4)S(C5=CC=C(C)C=C5)(=O)=O	273	200	0.17	27.57	99
R15_19_Cat08_T273	O=C(C(NC(C1=CC=CC=C1)=O)C(OC)=O)C#CCCCCC	Cl[Rh]N([C@H]([C@H](C1=CC=CC=C1)N([H])CC(C=C(OC)C=C2)=C2C3C(C)=C(C)C(C)=C3C)C4=CC=CC=C4)S(C5=CC=C(C)C=C5)(=O)=O	273	200	0.17	27.57	99
R17_07_Cat08_T298	O=C(C1OCCCO1)/C=C(NC(C)=O)/C2=CC=CC=C2	Cl[Rh]N([C@H]([C@H](C1=CC=CC=C1)N([H])CC(C=C(OC)C=C2)=C2C3C(C)=C(C)C(C)=C3C)C4=CC=CC=C4)S(C5=CC=C(C)C=C5)(=O)=O	298	100	0.17	27.57	99
R17_11_Cat08_T298	O=C(C1OCCCO1)/C=C(NC(C)=O)/C2=CC(OC)=CC=C2	Cl[Rh]N([C@H]([C@H](C1=CC=CC=C1)N([H])CC(C=C(OC)C=C2)=C2C3C(C)=C(C)C(C)=C3C)C4=CC=CC=C4)S(C5=CC=C(C)C=C5)(=O)=O	298	100	0.17	27.57	99
R17_12_Cat08_T298	O=C(C1OCCCO1)/C=C(NC(C)=O)/C2=CC=CC=C2OC	Cl[Rh]N([C@H]([C@H](C1=CC=CC=C1)N([H])CC(C=C(OC)C=C2)=C2C3C(C)=C(C)C(C)=C3C)C4=CC=CC=C4)S(C5=CC=C(C)C=C5)(=O)=O	298	100	0.17	27.57	99
R17_23_Cat08_T298	O=C(C1OCCCO1)/C=C(NC(C)=O)/C2=CC=CS2	Cl[Rh]N([C@H]([C@H](C1=CC=CC=C1)N([H])CC(C=C(OC)C=C2)=C2C3C(C)=C(C)C(C)=C3C)C4=CC=CC=C4)S(C5=CC=C(C)C=C5)(=O)=O	298	100	0.17	27.57	99
R20_01_Cat12_T323	O=C1C(CC2=CC=C(OC)C=C2)N3CCC1CC3	N[C@@H](C1=CC=CC=C1)[C@@H](N(S(=O)(C2=C(F)C(F)=C(F)C(F)=C2F)=O)[Ru]Cl)C3=CC=CC=C3.CC(C)C4=CC=C(C)C=C4	323	100	-0.14	72.3	99
R20_02_Cat12_T323	O=C1C(CC2=CC=CC(C)=C2)N3CCC1CC3	N[C@@H](C1=CC=CC=C1)[C@@H](N(S(=O)(C2=C(F)C(F)=C(F)C(F)=C2F)=O)[Ru]Cl)C3=CC=CC=C3.CC(C)C4=CC=C(C)C=C4	323	100	-0.14	72.3	99
R20_03_Cat12_T323	O=C1C(CC2=CC=C(C)C(C)=C2)N3CCC1CC3	N[C@@H](C1=CC=CC=C1)[C@@H](N(S(=O)(C2=C(F)C(F)=C(F)C(F)=C2F)=O)[Ru]Cl)C3=CC=CC=C3.CC(C)C4=CC=C(C)C=C4	323	100	-0.14	72.3	99
R20_04_Cat12_T323	O=C1C(CC2=CC=CC(NC(C)=O)=C2)N3CCC1CC3	N[C@@H](C1=CC=CC=C1)[C@@H](N(S(=O)(C2=C(F)C(F)=C(F)C(F)=C2F)=O)[Ru]Cl)C3=CC=CC=C3.CC(C)C4=CC=C(C)C=C4	323	100	-0.14	72.3	99
R20_05_Cat12_T323	O=C1C(CC2=CC=CC=C2O)N3CCC1CC3	N[C@@H](C1=CC=CC=C1)[C@@H](N(S(=O)(C2=C(F)C(F)=C(F)C(F)=C2F)=O)[Ru]Cl)C3=CC=CC=C3.CC(C)C4=CC=C(C)C=C4	323	100	-0.14	72.3	99
R20_08_Cat12_T323	O=C1C(CC2=CC=C(C3=CC=CC=C3)C=C2)N4CCC1CC4	N[C@@H](C1=CC=CC=C1)[C@@H](N(S(=O)(C2=C(F)C(F)=C(F)C(F)=C2F)=O)[Ru]Cl)C3=CC=CC=C3.CC(C)C4=CC=C(C)C=C4	323	100	-0.14	72.3	99
R20_09_Cat12_T323	O=C1C(CC2=CC=C(F)C=C2)N3CCC1CC3	N[C@@H](C1=CC=CC=C1)[C@@H](N(S(=O)(C2=C(F)C(F)=C(F)C(F)=C2F)=O)[Ru]Cl)C3=CC=CC=C3.CC(C)C4=CC=C(C)C=C4	323	100	-0.14	72.3	99
R20_12_Cat12_T323	O=C1C(CC2=CC(OC)=CC(OC)=C2)N3CCC1CC3	N[C@@H](C1=CC=CC=C1)[C@@H](N(S(=O)(C2=C(F)C(F)=C(F)C(F)=C2F)=O)[Ru]Cl)C3=CC=CC=C3.CC(C)C4=CC=C(C)C=C4	323	100	-0.14	72.3	99
R20_13_Cat12_T323	O=C1C(CC2=CC=C(OC)C(O)=C2)N3CCC1CC3	N[C@@H](C1=CC=CC=C1)[C@@H](N(S(=O)(C2=C(F)C(F)=C(F)C(F)=C2F)=O)[Ru]Cl)C3=CC=CC=C3.CC(C)C4=CC=C(C)C=C4	323	100	-0.14	72.3	99
R20_14_Cat12_T323	O=C1C(CC2=CC(C(C)(C)C)=CC=C2OC)N3CCC1CC3	N[C@@H](C1=CC=CC=C1)[C@@H](N(S(=O)(C2=C(F)C(F)=C(F)C(F)=C2F)=O)[Ru]Cl)C3=CC=CC=C3.CC(C)C4=CC=C(C)C=C4	323	100	-0.14	72.3	99
R20_16_Cat12_T323	O=C1C(CC2=CC=CC3=C2C=CC=C3)N4CCC1CC4	N[C@@H](C1=CC=CC=C1)[C@@H](N(S(=O)(C2=C(F)C(F)=C(F)C(F)=C2F)=O)[Ru]Cl)C3=CC=CC=C3.CC(C)C4=CC=C(C)C=C4	323	100	-0.14	72.3	99
R20_18_Cat12_T323	O=C1C(CC2=CC=C(C)S2)N3CCC1CC3	N[C@@H](C1=CC=CC=C1)[C@@H](N(S(=O)(C2=C(F)C(F)=C(F)C(F)=C2F)=O)[Ru]Cl)C3=CC=CC=C3.CC(C)C4=CC=C(C)C=C4	323	100	-0.14	72.3	99
R21_01_Cat08_T298	O=C(C(C)C#N)C1=CC=CC=C1	Cl[Rh]N([C@H]([C@H](C1=CC=CC=C1)N([H])CC(C=C(OC)C=C2)=C2C3C(C)=C(C)C(C)=C3C)C4=CC=CC=C4)S(C5=CC=C(C)C=C5)(=O)=O	298	100	0.17	27.57	99
R21_02_Cat08_T298	O=C(C(CC)C#N)C1=CC=CC=C1	Cl[Rh]N([C@H]([C@H](C1=CC=CC=C1)N([H])CC(C=C(OC)C=C2)=C2C3C(C)=C(C)C(C)=C3C)C4=CC=CC=C4)S(C5=CC=C(C)C=C5)(=O)=O	298	100	0.17	27.57	99
R21_03_Cat08_T298	O=C(C(C(C)C)C#N)C1=CC=CC=C1	Cl[Rh]N([C@H]([C@H](C1=CC=CC=C1)N([H])CC(C=C(OC)C=C2)=C2C3C(C)=C(C)C(C)=C3C)C4=CC=CC=C4)S(C5=CC=C(C)C=C5)(=O)=O	298	100	0.17	27.57	99
R21_04_Cat08_T298	O=C(C(C(C)(C)C)C#N)C1=CC=CC=C1	Cl[Rh]N([C@H]([C@H](C1=CC=CC=C1)N([H])CC(C=C(OC)C=C2)=C2C3C(C)=C(C)C(C)=C3C)C4=CC=CC=C4)S(C5=CC=C(C)C=C5)(=O)=O	298	100	0.17	27.57	99
R21_06_Cat08_T298	O=C(C(C1=CC=CC=C1)C#N)C2=CC=CC=C2	Cl[Rh]N([C@H]([C@H](C1=CC=CC=C1)N([H])CC(C=C(OC)C=C2)=C2C3C(C)=C(C)C(C)=C3C)C4=CC=CC=C4)S(C5=CC=C(C)C=C5)(=O)=O	298	100	0.17	27.57	99
R21_07_Cat08_T298	O=C(C(C1=CC=C(C=CC=C2)C2=C1)C#N)C3=CC=CC=C3	Cl[Rh]N([C@H]([C@H](C1=CC=CC=C1)N([H])CC(C=C(OC)C=C2)=C2C3C(C)=C(C)C(C)=C3C)C4=CC=CC=C4)S(C5=CC=C(C)C=C5)(=O)=O	298	100	0.17	27.57	99
R21_08_Cat08_T298	O=C(C(C(C)C)C#N)C1=CC=C(F)C=C1	Cl[Rh]N([C@H]([C@H](C1=CC=CC=C1)N([H])CC(C=C(OC)C=C2)=C2C3C(C)=C(C)C(C)=C3C)C4=CC=CC=C4)S(C5=CC=C(C)C=C5)(=O)=O	298	100	0.17	27.57	99
R21_09_Cat08_T298	O=C(C(C(C)C)C#N)C1=CC=C(Cl)C=C1	Cl[Rh]N([C@H]([C@H](C1=CC=CC=C1)N([H])CC(C=C(OC)C=C2)=C2C3C(C)=C(C)C(C)=C3C)C4=CC=CC=C4)S(C5=CC=C(C)C=C5)(=O)=O	298	100	0.17	27.57	99
R21_10_Cat08_T298	O=C(C(C(C)C)C#N)C1=CC=C(Br)C=C1	Cl[Rh]N([C@H]([C@H](C1=CC=CC=C1)N([H])CC(C=C(OC)C=C2)=C2C3C(C)=C(C)C(C)=C3C)C4=CC=CC=C4)S(C5=CC=C(C)C=C5)(=O)=O	298	100	0.17	27.57	99
R21_11_Cat08_T298	O=C(C(C(C)C)C#N)C1=CC=C(C(F)(F)F)C=C1	Cl[Rh]N([C@H]([C@H](C1=CC=CC=C1)N([H])CC(C=C(OC)C=C2)=C2C3C(C)=C(C)C(C)=C3C)C4=CC=CC=C4)S(C5=CC=C(C)C=C5)(=O)=O	298	100	0.17	27.57	99
R21_12_Cat08_T298	O=C(C(C(C)C)C#N)C1=CC=C(C)C=C1	Cl[Rh]N([C@H]([C@H](C1=CC=CC=C1)N([H])CC(C=C(OC)C=C2)=C2C3C(C)=C(C)C(C)=C3C)C4=CC=CC=C4)S(C5=CC=C(C)C=C5)(=O)=O	298	100	0.17	27.57	99
R21_13_Cat08_T298	O=C(C(C(C)C)C#N)C1=CC=C(OC)C=C1	Cl[Rh]N([C@H]([C@H](C1=CC=CC=C1)N([H])CC(C=C(OC)C=C2)=C2C3C(C)=C(C)C(C)=C3C)C4=CC=CC=C4)S(C5=CC=C(C)C=C5)(=O)=O	298	100	0.17	27.57	99
R21_14_Cat08_T298	O=C(C(C(C)C)C#N)C1=CC(OC)=CC=C1	Cl[Rh]N([C@H]([C@H](C1=CC=CC=C1)N([H])CC(C=C(OC)C=C2)=C2C3C(C)=C(C)C(C)=C3C)C4=CC=CC=C4)S(C5=CC=C(C)C=C5)(=O)=O	298	100	0.17	27.57	99
R21_15_Cat08_T298	O=C(C(C(C)C)C#N)C1=C(F)C=CC=C1	Cl[Rh]N([C@H]([C@H](C1=CC=CC=C1)N([H])CC(C=C(OC)C=C2)=C2C3C(C)=C(C)C(C)=C3C)C4=CC=CC=C4)S(C5=CC=C(C)C=C5)(=O)=O	298	100	0.17	27.57	99
R21_16_Cat08_T298	O=C(C(C(C)C)C#N)C1=CC(OC)=C(OC)C=C1	Cl[Rh]N([C@H]([C@H](C1=CC=CC=C1)N([H])CC(C=C(OC)C=C2)=C2C3C(C)=C(C)C(C)=C3C)C4=CC=CC=C4)S(C5=CC=C(C)C=C5)(=O)=O	298	100	0.17	27.57	99
R21_17_Cat08_T298	O=C(C(C(C)C)C#N)C1=CC(C=CC=C2)=C2C=C1	Cl[Rh]N([C@H]([C@H](C1=CC=CC=C1)N([H])CC(C=C(OC)C=C2)=C2C3C(C)=C(C)C(C)=C3C)C4=CC=CC=C4)S(C5=CC=C(C)C=C5)(=O)=O	298	100	0.17	27.57	99
R21_18_Cat08_T298	O=C(C(C(C)C)C#N)C1=CC=CS1	Cl[Rh]N([C@H]([C@H](C1=CC=CC=C1)N([H])CC(C=C(OC)C=C2)=C2C3C(C)=C(C)C(C)=C3C)C4=CC=CC=C4)S(C5=CC=C(C)C=C5)(=O)=O	298	100	0.17	27.57	99
R21_19_Cat08_T298	O=C(C(C(C)C)C#N)C1=CC=CO1	Cl[Rh]N([C@H]([C@H](C1=CC=CC=C1)N([H])CC(C=C(OC)C=C2)=C2C3C(C)=C(C)C(C)=C3C)C4=CC=CC=C4)S(C5=CC=C(C)C=C5)(=O)=O	298	100	0.17	27.57	99
R21_20_Cat08_T298	O=C(C(C(C)C)C#N)C1=CC=CC=N1	Cl[Rh]N([C@H]([C@H](C1=CC=CC=C1)N([H])CC(C=C(OC)C=C2)=C2C3C(C)=C(C)C(C)=C3C)C4=CC=CC=C4)S(C5=CC=C(C)C=C5)(=O)=O	298	100	0.17	27.57	99
R21_21_Cat08_T298	O=C(C(C(C)C)C#N)C1=CC2=C(C=CC=C2)N1C	Cl[Rh]N([C@H]([C@H](C1=CC=CC=C1)N([H])CC(C=C(OC)C=C2)=C2C3C(C)=C(C)C(C)=C3C)C4=CC=CC=C4)S(C5=CC=C(C)C=C5)(=O)=O	298	100	0.17	27.57	99
R21_22_Cat08_T298	O=C1C(C#N)CCC2=CC=CC=C21	Cl[Rh]N([C@H]([C@H](C1=CC=CC=C1)N([H])CC(C=C(OC)C=C2)=C2C3C(C)=C(C)C(C)=C3C)C4=CC=CC=C4)S(C5=CC=C(C)C=C5)(=O)=O	298	100	0.17	27.57	99
R21_23_Cat08_T298	O=C1C(C#N)CCCC2=CC=CC=C21	Cl[Rh]N([C@H]([C@H](C1=CC=CC=C1)N([H])CC(C=C(OC)C=C2)=C2C3C(C)=C(C)C(C)=C3C)C4=CC=CC=C4)S(C5=CC=C(C)C=C5)(=O)=O	298	100	0.17	27.57	99
R21_24_Cat08_T298	CC(C(C1=CC=CC=C1)C#N)=O	Cl[Rh]N([C@H]([C@H](C1=CC=CC=C1)N([H])CC(C=C(OC)C=C2)=C2C3C(C)=C(C)C(C)=C3C)C4=CC=CC=C4)S(C5=CC=C(C)C=C5)(=O)=O	298	100	0.17	27.57	99
R22_11_Cat13_T313	O=C(CC1=CC=CC=C1)C2=CC=CC3=C2C=CC=C3	N[C@@H](C1=CC=CC=C1)[C@@H](N(S(=O)(N(CCC2=CC=C(C)C=C2)C)=O)[Ru]Cl)C3=CC=CC=C3	313	1000	0.17	27.57	99
R07_02_Cat05_T300	O=C1C(N2C=C(C3=CC=C(C)C=C3)N=N2)CCC4=CC=CC=C41	Cl[Ru]N([C@H]([C@H](C1=CC=CC=C1)N([H])CCCC2=CC=CC=C2)C3=CC=CC=C3)S(C4=CC=C(C)C=C4)(=O)=O	300	100	0.17	27.57	99.2
R05_06_Cat06_T333	O=C1C(Cl)CC2=CC(Cl)=CC=C21	Cl[Ru]N([C@H]([C@H](C1=CC=CC=C1)N([H])CCOCC2=CC=C(C)C=C2)C3=CC=CC=C3)S(C4=CC=C(C)C=C4)(=O)=O	333	500	0.17	27.57	99.5
R05_10_Cat07_T313	O=C1C(Br)CC2=CC=CC=C21	Cl[Ru]N([C@H]([C@H](C1=CC=CC=C1)N([H])CCOCC2=CC=C(C)C=C2)C3=CC=CC=C3)S(C)(=O)=O	313	500	0.17	27.57	99.5
R07_08_Cat05_T300	O=C1C(N2C=CN=N2)CCC3=CC=CC=C31	Cl[Ru]N([C@H]([C@H](C1=CC=CC=C1)N([H])CCCC2=CC=CC=C2)C3=CC=CC=C3)S(C4=CC=C(C)C=C4)(=O)=O	300	100	0.17	27.57	99.5
R05_12_Cat06_T303	O=C1C(C(OC)=O)CC2=CC=CC=C21	Cl[Ru]N([C@H]([C@H](C1=CC=CC=C1)N([H])CCOCC2=CC=C(C)C=C2)C3=CC=CC=C3)S(C4=CC=C(C)C=C4)(=O)=O	303	500	0.17	27.57	99.6
R05_05_Cat06_T333	O=C1C(Cl)CC2=CC(OC)=CC=C21	Cl[Ru]N([C@H]([C@H](C1=CC=CC=C1)N([H])CCOCC2=CC=C(C)C=C2)C3=CC=CC=C3)S(C4=CC=C(C)C=C4)(=O)=O	333	200	0.17	27.57	99.7
R05_04_Cat06_T333	O=C1C(Cl)CC2=CC=CC=C21	Cl[Ru]N([C@H]([C@H](C1=CC=CC=C1)N([H])CCOCC2=CC=C(C)C=C2)C3=CC=CC=C3)S(C4=CC=C(C)C=C4)(=O)=O	333	500	0.17	27.57	99.8
R05_07_Cat06_T333	O=C1C(Cl)CC2=CC=CC(O)=C21	Cl[Ru]N([C@H]([C@H](C1=CC=CC=C1)N([H])CCOCC2=CC=C(C)C=C2)C3=CC=CC=C3)S(C4=CC=C(C)C=C4)(=O)=O	333	500	0.17	27.57	99.8
R05_01_Cat06_T333	O=C1C(Cl)CCC2=CC=CC=C21	Cl[Ru]N([C@H]([C@H](C1=CC=CC=C1)N([H])CCOCC2=CC=C(C)C=C2)C3=CC=CC=C3)S(C4=CC=C(C)C=C4)(=O)=O	333	1000	0.17	27.57	99.9
R05_02_Cat06_T333	O=C1C(Cl)CCC2=CC=C(OC)C=C21	Cl[Ru]N([C@H]([C@H](C1=CC=CC=C1)N([H])CCOCC2=CC=C(C)C=C2)C3=CC=CC=C3)S(C4=CC=C(C)C=C4)(=O)=O	333	500	0.17	27.57	99.9
R05_03_Cat06_T333	O=C1C(Cl)CCC2=CC=C(Br)C=C21	Cl[Ru]N([C@H]([C@H](C1=CC=CC=C1)N([H])CCOCC2=CC=C(C)C=C2)C3=CC=CC=C3)S(C4=CC=C(C)C=C4)(=O)=O	333	500	0.17	27.57	99.9
R05_14_Cat06_T333	O=C1C(C(NC(C)(C)C)=O)CC2=CC=CC=C21	Cl[Ru]N([C@H]([C@H](C1=CC=CC=C1)N([H])CCOCC2=CC=C(C)C=C2)C3=CC=CC=C3)S(C4=CC=C(C)C=C4)(=O)=O	333	500	0.17	27.57	99.9
R05_15_Cat06_T333	O=C1C(C(NC(C)(C)C)=O)CCC2=CC=CC=C21	Cl[Ru]N([C@H]([C@H](C1=CC=CC=C1)N([H])CCOCC2=CC=C(C)C=C2)C3=CC=CC=C3)S(C4=CC=C(C)C=C4)(=O)=O	333	500	0.17	27.57	99.9
R05_11_Cat07_T313	O=C1C(Br)CCC2=CC=CC=C21	Cl[Ru]N([C@H]([C@H](C1=CC=CC=C1)N([H])CCOCC2=CC=C(C)C=C2)C3=CC=CC=C3)S(C)(=O)=O	313	500	0.17	27.57	99.9
R05_16_Cat07_T333	O=C1C(C(NC(C)(C)C)=O)CCCC2=CC=CC=C21	Cl[Ru]N([C@H]([C@H](C1=CC=CC=C1)N([H])CCOCC2=CC=C(C)C=C2)C3=CC=CC=C3)S(C)(=O)=O	333	100	0.17	27.57	99.9
R05_01_Cat07_T333	O=C1C(Cl)CCC2=CC=CC=C21	Cl[Ru]N([C@H]([C@H](C1=CC=CC=C1)N([H])CCOCC2=CC=C(C)C=C2)C3=CC=CC=C3)S(C)(=O)=O	333	1000	0.17	27.57	99.9
R07_01_Cat05_T300	O=C1C(N2C=C(C3=CC=CC=C3)N=N2)CCC4=CC=CC=C41	Cl[Ru]N([C@H]([C@H](C1=CC=CC=C1)N([H])CCCC2=CC=CC=C2)C3=CC=CC=C3)S(C4=CC=C(C)C=C4)(=O)=O	300	100	0.17	27.57	99.9
R07_03_Cat05_T300	O=C1C(N2C=C(C3=CC=C(OC)C=C3)N=N2)CCC4=CC=CC=C41	Cl[Ru]N([C@H]([C@H](C1=CC=CC=C1)N([H])CCCC2=CC=CC=C2)C3=CC=CC=C3)S(C4=CC=C(C)C=C4)(=O)=O	300	100	0.17	27.57	99.9
R22_08_Cat13_T313	CC(C1=CC(C=CC=C2)=C2C3=C1C=CC=C3)=O	N[C@@H](C1=CC=CC=C1)[C@@H](N(S(=O)(N(CCC2=CC=C(C)C=C2)C)=O)[Ru]Cl)C3=CC=CC=C3	313	1000	0.17	27.57	99.9

## Sheet: DC
ε(T)=a+bT+cT^2+dT^3
Name	a	b	c	d			Name	Temperature/K	ε
Formic acid	140.4	-0.24673	-0.00017151				FA/TEA=5:2	301.15	36.781
Triethylamine	2.9205	-0.0014007	-1.3469e-06				FA/TEA=5:2	303.15	36.2792
Ethyl acetate	15.646	-0.044066	3.9137e-05				FA/TEA=5:2	323.15	31.2071
2-Propanol	104.16	-0.41011	0.00042049				FA/TEA=5:2	333.15	28.6342
Dichloromethane	40.452	-0.17748	0.00023942				FA/TEA=5:2	313.15	33.7555
							FA/TEA=5:2	283.15	41.253
							FA/TEA=5:2	298.15	37.5319
							FA/TEA=5:2	287.15	40.2661
							FA/TEA=5:2	353.15	23.4147
							Ethyl acetate	303.15	5.88408
							Ethyl acetate	313.15	5.68462
							Ethyl acetate	333.15	5.30919
							IPA/DCM	323.15	11.822
							IPA	323.15	15.543

## Sheet: 01
Reactions_Number	S_SMILES	C_SMILES	Temperature	S_C	H_logP	H_TPSA	Atom1 NBO charge	Atom3 NBO charge	Atom4 NBO charge	C=O/C=N Vibration Frequency	Sterimol L1	Sterimol Bmin1	Sterimol Bmax1	Sterimol L2	Sterimol Bmin2	Sterimol Bmax2	C_Di_HA	Bite_Anger	C_BL1	C_BL2	Ph_distance	N_Q1	N_Q2	M_Q	%V_bur	Ee
R01_01_Cat01_T301	CC(C1=CC=CC=C1)=O	N[C@@H](C1=CC=CC=C1)[C@@H](N([Ru]Cl)S(C2=CC=C(C)C=C2)(=O)=O)C3=CC=CC=C3.CC4=CC(C)=CC(C)=C4	301	200	0.17	27.57	-0.628	-0.167	-0.789	1712.59	3.4506	1.7	4.96223	2.18487	1.7	2.13562	42.2	77.79	2.14262	2.12838	1.73	-0.863	-0.742	0.027	0.796	98
R01_02_Cat01_T301	CC(C1=CC(Cl)=CC=C1)=O	N[C@@H](C1=CC=CC=C1)[C@@H](N([Ru]Cl)S(C2=CC=C(C)C=C2)(=O)=O)C3=CC=CC=C3.CC4=CC(C)=CC(C)=C4	301	200	0.17	27.57	-0.619	-0.147	-0.79	1720.9	5.77909	1.75	4.45784	2.18495	1.7	2.13574	42.2	77.79	2.14262	2.12838	1.73	-0.863	-0.742	0.027	0.796	97
R01_03_Cat01_T301	CC(C1=CC=C(Cl)C=C1)=O	N[C@@H](C1=CC=CC=C1)[C@@H](N([Ru]Cl)S(C2=CC=C(C)C=C2)(=O)=O)C3=CC=CC=C3.CC4=CC(C)=CC(C)=C4	301	200	0.17	27.57	-0.623	-0.164	-0.79	1716.53	6.288	1.75	3.24778	2.18494	1.7	2.13553	42.2	77.79	2.14262	2.12838	1.73	-0.863	-0.742	0.027	0.796	95
R01_04_Cat01_T301	CC(C1=CC(OC)=CC=C1)=O	N[C@@H](C1=CC=CC=C1)[C@@H](N([Ru]Cl)S(C2=CC=C(C)C=C2)(=O)=O)C3=CC=CC=C3.CC4=CC(C)=CC(C)=C4	301	200	0.17	27.57	-0.626	-0.153	-0.789	1713.83	6.45363	1.7	4.13179	2.1849	1.7	2.13593	42.2	77.79	2.14262	2.12838	1.73	-0.863	-0.742	0.027	0.796	98
R01_05_Cat01_T301	CC(C1=CC=C(OC)C=C1)=O	N[C@@H](C1=CC=CC=C1)[C@@H](N([Ru]Cl)S(C2=CC=C(C)C=C2)(=O)=O)C3=CC=CC=C3.CC4=CC(C)=CC(C)=C4	301	200	0.17	27.57	-0.642	-0.197	-0.787	1700.81	6.89068	1.7	4.02544	2.18482	1.7	2.13546	42.2	77.79	2.14262	2.12838	1.73	-0.863	-0.742	0.027	0.796	97
R01_06_Cat01_T301	O=C(CC)C1=CC=CC=C1	N[C@@H](C1=CC=CC=C1)[C@@H](N([Ru]Cl)S(C2=CC=C(C)C=C2)(=O)=O)C3=CC=CC=C3.CC4=CC(C)=CC(C)=C4	301	200	0.17	27.57	-0.63	-0.166	-0.553	1706.85	4.97751	1.70585	3.24842	3.26966	1.7	2.71334	42.2	77.79	2.14262	2.12838	1.73	-0.863	-0.742	0.027	0.796	97
R01_07_Cat01_T301	O=C(CCCC(OCC)=O)C1=CC=CC=C1	N[C@@H](C1=CC=CC=C1)[C@@H](N([Ru]Cl)S(C2=CC=C(C)C=C2)(=O)=O)C3=CC=CC=C3.CC4=CC(C)=CC(C)=C4	301	200	0.17	27.57	-0.628	-0.163	-0.559	1711.28	4.97628	1.70744	3.24703	9.3096	2.03198	3.5368	42.2	77.79	2.14262	2.12838	1.73	-0.863	-0.742	0.027	0.796	95
R01_08_Cat01_T301	CC(C1=CC(C=CC=C2)=C2C=C1)=O	N[C@@H](C1=CC=CC=C1)[C@@H](N([Ru]Cl)S(C2=CC=C(C)C=C2)(=O)=O)C3=CC=CC=C3.CC4=CC(C)=CC(C)=C4	301	200	0.17	27.57	-0.631	-0.167	-0.789	1717.21	4.26729	1.7	7.1796	2.18497	1.7	2.13616	42.2	77.79	2.14262	2.12838	1.73	-0.863	-0.742	0.027	0.796	96
R01_09_Cat01_T301	O=C1CCC2=CC=CC=C21	N[C@@H](C1=CC=CC=C1)[C@@H](N([Ru]Cl)S(C2=CC=C(C)C=C2)(=O)=O)C3=CC=CC=C3.CC4=CC(C)=CC(C)=C4	301	200	0.17	27.57	-0.635	-0.172	-0.559	1731.74	3.3693	1.7	4.92688	3.2923	1.7	2.70126	42.2	77.79	2.14262	2.12838	1.73	-0.863	-0.742	0.027	0.796	99
R01_10_Cat01_T301	O=C1CCCC2=CC=CC=C21	N[C@@H](C1=CC=CC=C1)[C@@H](N([Ru]Cl)S(C2=CC=C(C)C=C2)(=O)=O)C3=CC=CC=C3.CC4=CC(C)=CC(C)=C4	301	200	0.17	27.57	-0.638	-0.172	-0.556	1708.71	4.96607	1.70368	3.25001	4.08672	1.7	3.17919	42.2	77.79	2.14262	2.12838	1.73	-0.863	-0.742	0.027	0.796	99
R01_11_Cat01_T301	CC(C1=CC=CS1)=O	N[C@@H](C1=CC=CC=C1)[C@@H](N([Ru]Cl)S(C2=CC=C(C)C=C2)(=O)=O)C3=CC=CC=C3.CC4=CC(C)=CC(C)=C4	301	200	0.17	27.57	-0.628	-0.345	-0.789	1694.37	4.63553	1.75942	3.4572	2.18543	1.7	2.13474	42.2	77.79	2.14262	2.12838	1.73	-0.863	-0.742	0.027	0.796	98
R01_12_Cat01_T301	O=C1CC(C)(C)OC2=CC=CC=C21	N[C@@H](C1=CC=CC=C1)[C@@H](N([Ru]Cl)S(C2=CC=C(C)C=C2)(=O)=O)C3=CC=CC=C3.CC4=CC(C)=CC(C)=C4	301	200	0.17	27.57	-0.63	-0.237	-0.581	1713.76	3.42399	1.7	4.95951	4.57124	2.20148	3.71039	42.2	77.79	2.14262	2.12838	1.73	-0.863	-0.742	0.027	0.796	97
R01_01_Cat01_T333	CC(C1=CC=CC=C1)=O	N[C@@H](C1=CC=CC=C1)[C@@H](N([Ru]Cl)S(C2=CC=C(C)C=C2)(=O)=O)C3=CC=CC=C3.CC4=CC(C)=CC(C)=C4	333	200	0.17	27.57	-0.628	-0.167	-0.789	1712.59	3.4506	1.7	4.96223	2.18487	1.7	2.13562	42.2	78.62	2.11968	2.13272	1.73	-0.87	-0.742	0.025	0.796	96
R01_10_Cat01_T333	O=C1CCCC2=CC=CC=C21	N[C@@H](C1=CC=CC=C1)[C@@H](N([Ru]Cl)S(C2=CC=C(C)C=C2)(=O)=O)C3=CC=CC=C3.CC4=CC(C)=CC(C)=C4	333	200	0.17	27.57	-0.636	-0.172	-0.556	1709.68	4.96602	1.70368	3.24998	4.08674	1.7	3.17913	42.2	78.62	2.11968	2.13272	1.73	-0.87	-0.742	0.025	0.796	98
Solvent: FA/TEA=5:2
Hydrogen source：FA/TEA=5:2

## Sheet: 02
Reactions_Number	S_SMILES	C_SMILES	Temperature	S_C	H_logP	H_TPSA	Atom1 NBO charge	Atom3 NBO charge	Atom4 NBO charge	C=O/C=N Vibration Frequency	Sterimol L1	Sterimol Bmin1	Sterimol Bmax1	Sterimol L2	Sterimol Bmin2	Sterimol Bmax2	C_Di_HA	Bite_Anger	C_BL1	C_BL2	Ph_distance	N_Q1	N_Q2	M_Q	%V_bur	Ee
R02_01_Cat02_T313	CC(C1=CC=CC=C1)=O	Cl[Ru]N([C@H]([C@H](C1=CC=CC=C1)N([H])CC(C=CC=C2)=C2C3=CC=CC=C3)C4=CC=CC=C4)S(C5=CC=C(C)C=C5)(=O)=O	313	200	0.17	27.57	-0.628	-0.167	-0.789	1712.59	3.4506	1.7	4.96223	2.18487	1.7	2.13562	42.1	79.22	2.16755	2.14475	1.77	-0.854	-0.553	0.034	0.783	95
R02_02_Cat02_T301	CC(C1=CC(Cl)=CC=C1)=O	Cl[Ru]N([C@H]([C@H](C1=CC=CC=C1)N([H])CC(C=CC=C2)=C2C3=CC=CC=C3)C4=CC=CC=C4)S(C5=CC=C(C)C=C5)(=O)=O	301	200	0.17	27.57	-0.619	-0.147	-0.79	1720.9	5.77909	1.75	4.45784	2.18495	1.7	2.13574	42.1	79.22	2.16778	2.14473	1.77	-0.854	-0.553	0.035	0.783	88
R02_04_Cat02_T301	O=C(CCl)C1=CC=CC=C1	Cl[Ru]N([C@H]([C@H](C1=CC=CC=C1)N([H])CC(C=CC=C2)=C2C3=CC=CC=C3)C4=CC=CC=C4)S(C5=CC=C(C)C=C5)(=O)=O	301	200	0.17	27.57	-0.6	-0.168	-0.533	1738.42	3.45534	1.7	4.95917	2.29073	1.7	3.46679	42.1	79.22	2.16778	2.14473	1.77	-0.854	-0.553	0.035	0.783	92
R02_05_Cat02_T301	O=C(COC1=CC=CC=C1)C2=CC=CC=C2	Cl[Ru]N([C@H]([C@H](C1=CC=CC=C1)N([H])CC(C=CC=C2)=C2C3=CC=CC=C3)C4=CC=CC=C4)S(C5=CC=C(C)C=C5)(=O)=O	301	200	0.17	27.57	-0.605	-0.172	-0.2	1722.67	6.07275	1.7	6.04037	3.44643	1.7	4.9592	42.1	79.22	2.16778	2.14473	1.77	-0.854	-0.553	0.035	0.783	93
R02_03_Cat02_T313	CC(C1=CC=C(Cl)C=C1)=O	Cl[Ru]N([C@H]([C@H](C1=CC=CC=C1)N([H])CC(C=CC=C2)=C2C3=CC=CC=C3)C4=CC=CC=C4)S(C5=CC=C(C)C=C5)(=O)=O	313	200	0.17	27.57	-0.623	-0.164	-0.79	1716.83	6.28798	1.75	3.24777	2.18494	1.7	2.13552	42.1	79.22	2.16755	2.14475	1.77	-0.854	-0.553	0.034	0.783	89
R02_02_Cat03_T301	CC(C1=CC(Cl)=CC=C1)=O	Cl[Ru]N([C@H]1CCCC[C@@H]1N([H])CCCC2=CC=CC=C2)S(C3=CC=C(C)C=C3)(=O)=O	301	200	0.17	27.57	-0.619	-0.147	-0.79	1720.9	5.77909	1.75	4.45784	2.18495	1.7	2.13574	43.2	79.27	2.15206	2.16809	1.75	-0.887	-0.561	0.034	0.794	86
R02_03_Cat03_T301	CC(C1=CC=C(Cl)C=C1)=O	Cl[Ru]N([C@H]1CCCC[C@@H]1N([H])CCCC2=CC=CC=C2)S(C3=CC=C(C)C=C3)(=O)=O	301	200	0.17	27.57	-0.623	-0.164	-0.79	1716.53	6.28799	1.75	3.24778	2.18494	1.7	2.13553	43.2	79.27	2.15206	2.16809	1.75	-0.887	-0.561	0.034	0.794	86
R02_04_Cat03_T301	O=C(CCl)C1=CC=CC=C1	Cl[Ru]N([C@H]1CCCC[C@@H]1N([H])CCCC2=CC=CC=C2)S(C3=CC=C(C)C=C3)(=O)=O	301	200	0.17	27.57	-0.6	-0.168	-0.533	1738.42	3.45534	1.7	4.95917	2.29073	1.7	3.46679	43.2	79.27	2.15206	2.16809	1.75	-0.887	-0.561	0.034	0.794	83
R02_05_Cat03_T301	O=C(COC1=CC=CC=C1)C2=CC=CC=C2	Cl[Ru]N([C@H]1CCCC[C@@H]1N([H])CCCC2=CC=CC=C2)S(C3=CC=C(C)C=C3)(=O)=O	301	200	0.17	27.57	-0.605	-0.172	-0.2	1722.67	6.07275	1.7	6.04037	3.44643	1.7	4.9592	43.2	79.27	2.15206	2.16809	1.75	-0.887	-0.561	0.034	0.794	85
R02_06_Cat03_T301	CC(C1=CC=CC(C(F)(F)F)=C1)=O	Cl[Ru]N([C@H]1CCCC[C@@H]1N([H])CCCC2=CC=CC=C2)S(C3=CC=C(C)C=C3)(=O)=O	301	200	0.17	27.57	-0.626	-0.153	-0.784	1708	4.93597	1.7	5.41278	2.18447	1.7	2.13529	43.2	79.27	2.15206	2.16809	1.75	-0.887	-0.561	0.034	0.794	88
R02_07_Cat03_T301	CC(C1=CC(OC)=CC=C1)=O	Cl[Ru]N([C@H]1CCCC[C@@H]1N([H])CCCC2=CC=CC=C2)S(C3=CC=C(C)C=C3)(=O)=O	301	200	0.17	27.57	-0.626	-0.153	-0.789	1713.82	6.45363	1.7	4.13179	2.1849	1.7	2.13593	43.2	79.27	2.15206	2.16809	1.75	-0.887	-0.561	0.034	0.794	83
Solvent: FA/TEA=5:2
Hydrogen source：FA/TEA=5:2

## Sheet: 03
Reactions_Number	S_SMILES	C_SMILES	Temperature	S_C	H_logP	H_TPSA	Atom1 NBO charge	Atom3 NBO charge	Atom4 NBO charge	C=O/C=N Vibration Frequency	Sterimol L1	Sterimol Bmin1	Sterimol Bmax1	Sterimol L2	Sterimol Bmin2	Sterimol Bmax2	C_Di_HA	Bite_Anger	C_BL1	C_BL2	Ph_distance	N_Q1	N_Q2	M_Q	%V_bur	Ee
R03_01_Cat04_T303	CC(C(Cl)(Cl)C(OCC1=CC=CC=C1)=O)=O	N[C@@H](C1=CC=CC=C1)[C@@H](N([Ru]Cl)S(C2=CC=C(C)C=C2)(=O)=O)C3=CC=CC=C3.CC(C)C4=CC=C(C)C=C4	303	100	0.17	27.57	-0.534	-0.227	-0.797	1809.77	8.59873	2.48022	5.77867	2.18064	1.7	2.12682	41.4	78.61	2.15133	2.13191	1.74	-0.843	-0.741	0.025	0.783	99
R03_02_Cat04_T303	O=C(C(Cl)(Cl)C(OCC1=CC=CC=C1)=O)CCCC	N[C@@H](C1=CC=CC=C1)[C@@H](N([Ru]Cl)S(C2=CC=C(C)C=C2)(=O)=O)C3=CC=CC=C3.CC(C)C4=CC=C(C)C=C4	303	100	0.17	27.57	-0.537	-0.223	-0.569	1802.19	8.66897	2.59896	5.72223	5.47698	1.82343	3.0975	41.4	78.61	2.15133	2.13191	1.74	-0.843	-0.741	0.025	0.783	99
R03_03_Cat04_T303	O=C(C(Cl)(Cl)C(OCC1=CC=CC=C1)=O)CC(C)C	N[C@@H](C1=CC=CC=C1)[C@@H](N([Ru]Cl)S(C2=CC=C(C)C=C2)(=O)=O)C3=CC=CC=C3.CC(C)C4=CC=C(C)C=C4	303	100	0.17	27.57	-0.54	-0.222	-0.568	1802.39	18.5248	1.95828	3.72095	8.61503	2.47082	5.73712	41.4	78.61	2.15133	2.13191	1.74	-0.843	-0.741	0.025	0.783	98
R03_04_Cat04_T303	O=C(C(Cl)(Cl)C(OCC1=CC=CC=C1)=O)CCCCCCCCCCCCCC	N[C@@H](C1=CC=CC=C1)[C@@H](N([Ru]Cl)S(C2=CC=C(C)C=C2)(=O)=O)C3=CC=CC=C3.CC(C)C4=CC=C(C)C=C4	303	100	0.17	27.57	-0.54	-0.221	-0.573	1801.31	8.60028	2.45013	5.73917	4.08429	1.73689	4.07989	41.4	78.61	2.15133	2.13191	1.74	-0.843	-0.741	0.025	0.783	99
R03_05_Cat04_T303	CC(C(Cl)(Cl)C(OC(C)(C)C)=O)=O	N[C@@H](C1=CC=CC=C1)[C@@H](N([Ru]Cl)S(C2=CC=C(C)C=C2)(=O)=O)C3=CC=CC=C3.CC(C)C4=CC=C(C)C=C4	303	100	0.17	27.57	-0.527	-0.221	-0.794	1839.8	6.33473	2.15605	5.05593	2.18211	1.7	2.13138	41.4	78.61	2.15133	2.13191	1.74	-0.843	-0.741	0.025	0.783	99
R03_06_Cat04_T303	CC(C(Cl)(Cl)C(OCC=C)=O)=O	N[C@@H](C1=CC=CC=C1)[C@@H](N([Ru]Cl)S(C2=CC=C(C)C=C2)(=O)=O)C3=CC=CC=C3.CC(C)C4=CC=C(C)C=C4	303	100	0.17	27.57	-0.524	-0.225	-0.795	1840.86	7.49176	2.12624	3.54453	2.18565	1.7	2.12727	41.4	78.61	2.15133	2.13191	1.74	-0.843	-0.741	0.025	0.783	99
R03_07_Cat04_T303	O=C(C(Cl)(Cl)C(OCC=C)=O)CCC1=CC=CC=C1	N[C@@H](C1=CC=CC=C1)[C@@H](N([Ru]Cl)S(C2=CC=C(C)C=C2)(=O)=O)C3=CC=CC=C3.CC(C)C4=CC=C(C)C=C4	303	100	0.17	27.57	-0.525	-0.22	-0.558	1835.12	6.0955	1.7	5.92737	7.49565	1.9711	3.58231	41.4	78.61	2.15133	2.13191	1.74	-0.843	-0.741	0.025	0.783	99
R03_08_Cat04_T303	O=C(C(Cl)(Cl)C(OCC)=O)CCC	N[C@@H](C1=CC=CC=C1)[C@@H](N([Ru]Cl)S(C2=CC=C(C)C=C2)(=O)=O)C3=CC=CC=C3.CC(C)C4=CC=C(C)C=C4	303	100	0.17	27.57	-0.528	-0.219	-0.567	1834.94	6.58417	2.78298	3.75931	4.10525	1.73007	3.17979	41.4	78.61	2.15133	2.13191	1.74	-0.843	-0.741	0.025	0.783	99
R03_09_Cat04_T303	O=C(C(Cl)(Cl)C(OC)=O)CCCC#C	N[C@@H](C1=CC=CC=C1)[C@@H](N([Ru]Cl)S(C2=CC=C(C)C=C2)(=O)=O)C3=CC=CC=C3.CC(C)C4=CC=C(C)C=C4	303	100	0.17	27.57	-0.524	-0.221	-0.568	1836.06	7.10367	1.97219	2.81868	5.30057	2.50938	3.54686	41.4	78.61	2.15133	2.13191	1.74	-0.843	-0.741	0.025	0.783	98.5
R03_10_Cat04_T303	O=C(C(Cl)(Cl)C(OC)=O)CCC1=C(Cl)C(OC)=C(OC)C(OC)=C1Cl	N[C@@H](C1=CC=CC=C1)[C@@H](N([Ru]Cl)S(C2=CC=C(C)C=C2)(=O)=O)C3=CC=CC=C3.CC(C)C4=CC=C(C)C=C4	303	100	0.17	27.57	-0.524	-0.221	-0.559	1836.1	8.73022	2.73038	6.84276	5.30508	1.91161	3.54484	41.4	78.61	2.15133	2.13191	1.74	-0.843	-0.741	0.025	0.783	98
R03_11_Cat04_T303	O=C(C(Cl)(Cl)C(OCC)=O)C1=CC=CC=C1	N[C@@H](C1=CC=CC=C1)[C@@H](N([Ru]Cl)S(C2=CC=C(C)C=C2)(=O)=O)C3=CC=CC=C3.CC(C)C4=CC=C(C)C=C4	303	100	0.17	27.57	-0.536	-0.172	-0.217	1752.14	6.55281	1.7	3.82535	3.43343	1.7	4.96383	41.4	78.61	2.15133	2.13191	1.74	-0.843	-0.741	0.025	0.783	70
R03_12_Cat04_T303	O=C(C(Cl)(Cl)C(OCC)=O)C1=CC=C(OC)C=C1	N[C@@H](C1=CC=CC=C1)[C@@H](N([Ru]Cl)S(C2=CC=C(C)C=C2)(=O)=O)C3=CC=CC=C3.CC(C)C4=CC=C(C)C=C4	303	100	0.17	27.57	-0.553	-0.203	-0.213	1736.15	6.88752	1.7	4.01966	6.55684	1.7	3.82105	41.4	78.61	2.15133	2.13191	1.74	-0.843	-0.741	0.025	0.783	71
R03_13_Cat04_T303	O=C(C(F)(F)C(OCC)=O)C1=CC=C(CCCCC)C=C1	N[C@@H](C1=CC=CC=C1)[C@@H](N([Ru]Cl)S(C2=CC=C(C)C=C2)(=O)=O)C3=CC=CC=C3.CC(C)C4=CC=C(C)C=C4	303	100	0.17	27.57	-0.551	0.646	-0.186	1754.47	10.866	1.7	3.69161	6.54849	1.7	3.8034	41.4	78.61	2.15133	2.13191	1.74	-0.843	-0.741	0.025	0.783	98
R03_14_Cat04_T303	O=C(C(F)(F)C(OCC)=O)CCC1=CC=CC=C1	N[C@@H](C1=CC=CC=C1)[C@@H](N([Ru]Cl)S(C2=CC=C(C)C=C2)(=O)=O)C3=CC=CC=C3.CC(C)C4=CC=C(C)C=C4	303	100	0.17	27.57	-0.528	0.641	-0.567	1830.04	6.1144	1.7	5.91963	6.55113	1.7	3.79728	41.4	78.61	2.15133	2.13191	1.74	-0.843	-0.741	0.025	0.783	98
R03_15_Cat04_T303	CC(C(Cl)(Cl)C(NC1=CC=CC=C1)=O)=O	N[C@@H](C1=CC=CC=C1)[C@@H](N([Ru]Cl)S(C2=CC=C(C)C=C2)(=O)=O)C3=CC=CC=C3.CC(C)C4=CC=C(C)C=C4	303	100	0.17	27.57	-0.551	-0.209	-0.794	1803.08	7.90183	1.7	6.03574	2.18068	1.7	2.12737	41.4	78.61	2.15133	2.13191	1.74	-0.843	-0.741	0.025	0.783	98.5
R03_16_Cat04_T303	CC(C(Cl)(Cl)C(N(CC=C)CC1=CC=CC=C1)=O)=O	N[C@@H](C1=CC=CC=C1)[C@@H](N([Ru]Cl)S(C2=CC=C(C)C=C2)(=O)=O)C3=CC=CC=C3.CC(C)C4=CC=C(C)C=C4	303	100	0.17	27.57	-0.534	-0.206	-0.794	1807.52	6.89326	2.20359	8.44749	2.18573	1.7	2.13297	41.4	78.61	2.15133	2.13191	1.74	-0.843	-0.741	0.025	0.783	98
Solvent: DCM
Hydrogen source：FA/TEA=5:2

## Sheet: 04
Reactions_Number	S_SMILES	C_SMILES	Temperature	S_C	H_logP	H_TPSA	Atom1 NBO charge	Atom3 NBO charge	Atom4 NBO charge	C=O/C=N Vibration Frequency	Sterimol L1	Sterimol Bmin1	Sterimol Bmax1	Sterimol L2	Sterimol Bmin2	Sterimol Bmax2	C_Di_HA	Bite_Anger	C_BL1	C_BL2	Ph_distance	N_Q1	N_Q2	M_Q	%V_bur	Ee
R04_01_Cat05_T301	CC(C1=CC=CC=C1)=O	Cl[Ru]N([C@H]([C@H](C1=CC=CC=C1)N([H])CCCC2=CC=CC=C2)C3=CC=CC=C3)S(C4=CC=C(C)C=C4)(=O)=O	301	200	0.17	27.57	-0.628	-0.167	-0.789	1712.59	3.4506	1.7	4.96223	2.18487	1.7	2.13562	39.9	77.32	2.16677	2.15106	1.74	-0.834	-0.553	0.033	0.792	96
R04_01_Cat05_T313	CC(C1=CC=CC=C1)=O	Cl[Ru]N([C@H]([C@H](C1=CC=CC=C1)N([H])CCCC2=CC=CC=C2)C3=CC=CC=C3)S(C4=CC=C(C)C=C4)(=O)=O	313	200	0.17	27.57	-0.628	-0.167	-0.789	1712.59	3.4506	1.7	4.96222	2.18487	1.7	2.13561	39.9	77.31	2.16664	2.15112	1.74	-0.834	-0.553	0.033	0.792	96
R04_01_Cat05_T353	CC(C1=CC=CC=C1)=O	Cl[Ru]N([C@H]([C@H](C1=CC=CC=C1)N([H])CCCC2=CC=CC=C2)C3=CC=CC=C3)S(C4=CC=C(C)C=C4)(=O)=O	353	200	0.17	27.57	-0.626	-0.167	-0.789	1714.39	3.45062	1.7	4.96217	2.18488	1.7	2.13556	40	77.3	2.16582	2.15144	1.74	-0.851	-0.552	0.023	0.792	94
R04_02_Cat05_T287	CC(C1CCCCC1)=O	Cl[Ru]N([C@H]([C@H](C1=CC=CC=C1)N([H])CCCC2=CC=CC=C2)C3=CC=CC=C3)S(C4=CC=C(C)C=C4)(=O)=O	287	200	0.17	27.57	-0.634	-0.351	-0.791	1735.18	3.54125	1.7	5.03053	2.18651	1.7	2.13372	39.9	77.31	2.16696	2.151	1.74	-0.834	-0.553	0.033	0.792	72
R04_02_Cat05_T301	CC(C1CCCCC1)=O	Cl[Ru]N([C@H]([C@H](C1=CC=CC=C1)N([H])CCCC2=CC=CC=C2)C3=CC=CC=C3)S(C4=CC=C(C)C=C4)(=O)=O	301	200	0.17	27.57	-0.634	-0.351	-0.791	1735.49	3.54129	1.7	5.03055	2.18651	1.7	2.13372	39.9	77.32	2.16677	2.15106	1.74	-0.834	-0.553	0.033	0.792	69
R04_03_Cat05_T313	O=C(C1=CC=CC=C1)C2CCCCC2	Cl[Ru]N([C@H]([C@H](C1=CC=CC=C1)N([H])CCCC2=CC=CC=C2)C3=CC=CC=C3)S(C4=CC=C(C)C=C4)(=O)=O	313	200	0.17	27.57	-0.629	-0.162	-0.347	1693.17	3.50844	1.7	5.01873	3.47095	1.7	4.96814	39.9	77.31	2.16664	2.15112	1.74	-0.834	-0.553	0.033	0.792	94
R04_04_Cat05_T301	O=C(CC)C1=CC=CC=C1	Cl[Ru]N([C@H]([C@H](C1=CC=CC=C1)N([H])CCCC2=CC=CC=C2)C3=CC=CC=C3)S(C4=CC=C(C)C=C4)(=O)=O	301	200	0.17	27.57	-0.63	-0.166	-0.553	1706.85	4.97751	1.70585	3.24842	3.26966	1.7	2.71334	39.9	77.32	2.16677	2.15106	1.74	-0.834	-0.553	0.033	0.792	95
R04_04_Cat05_T313	O=C(CC)C1=CC=CC=C1	Cl[Ru]N([C@H]([C@H](C1=CC=CC=C1)N([H])CCCC2=CC=CC=C2)C3=CC=CC=C3)S(C4=CC=C(C)C=C4)(=O)=O	313	200	0.17	27.57	-0.63	-0.166	-0.553	1707.12	4.9775	1.70595	3.24841	3.26963	1.7	2.71334	39.9	77.31	2.16664	2.15112	1.74	-0.834	-0.553	0.033	0.792	95
R04_05_Cat05_T313	O=C(C(C)C)C1=CC=CC=C1	Cl[Ru]N([C@H]([C@H](C1=CC=CC=C1)N([H])CCCC2=CC=CC=C2)C3=CC=CC=C3)S(C4=CC=C(C)C=C4)(=O)=O	313	200	0.17	27.57	-0.628	-0.162	-0.338	1708.28	3.43401	1.7	4.96825	3.26963	1.7	3.24811	39.9	77.31	2.16664	2.15112	1.74	-0.834	-0.553	0.033	0.792	95
R04_06_Cat05_T313	O=C(C(C)(C)C)C1=CC=CC=C1	Cl[Ru]N([C@H]([C@H](C1=CC=CC=C1)N([H])CCCC2=CC=CC=C2)C3=CC=CC=C3)S(C4=CC=C(C)C=C4)(=O)=O	313	200	0.17	27.57	-0.622	-0.132	-0.156	1700	3.47386	1.7	4.97013	3.30575	1.7	3.24784	39.9	77.31	2.16664	2.15112	1.74	-0.834	-0.553	0.033	0.792	77
R04_07_Cat05_T313	O=C(C1CC1)C2=CC=CC=C2	Cl[Ru]N([C@H]([C@H](C1=CC=CC=C1)N([H])CCCC2=CC=CC=C2)C3=CC=CC=C3)S(C4=CC=C(C)C=C4)(=O)=O	313	200	0.17	27.57	-0.653	-0.153	-0.36	1685.64	3.43485	1.7	4.96838	3.32176	1.7	3.31121	39.9	77.31	2.16664	2.15112	1.74	-0.834	-0.553	0.033	0.792	78
R04_08_Cat05_T313	O=C(C1CCCC1)C2=CC=CC=C2	Cl[Ru]N([C@H]([C@H](C1=CC=CC=C1)N([H])CCCC2=CC=CC=C2)C3=CC=CC=C3)S(C4=CC=C(C)C=C4)(=O)=O	313	200	0.17	27.57	-0.628	-0.161	-0.354	1708.7	3.43289	1.7	4.96764	3.29017	1.7	4.48106	39.9	77.31	2.16664	2.15112	1.74	-0.834	-0.553	0.033	0.792	78
Solvent: FA/TEA=5:2
Hydrogen source：FA/TEA=5:2

## Sheet: 05
Reactions_Number	S_SMILES	C_SMILES	Temperature	S_C	H_logP	H_TPSA	Atom1 NBO charge	Atom3 NBO charge	Atom4 NBO charge	C=O/C=N Vibration Frequency	Sterimol L1	Sterimol Bmin1	Sterimol Bmax1	Sterimol L2	Sterimol Bmin2	Sterimol Bmax2	C_Di_HA	Bite_Anger	C_BL1	C_BL2	Ph_distance	N_Q1	N_Q2	M_Q	%V_bur	Ee
R05_01_Cat06_T333	O=C1C(Cl)CCC2=CC=CC=C21	Cl[Ru]N([C@H]([C@H](C1=CC=CC=C1)N([H])CCOCC2=CC=C(C)C=C2)C3=CC=CC=C3)S(C4=CC=C(C)C=C4)(=O)=O	333	1000	0.17	27.57	-0.582	-0.168	-0.303	1748.39	3.42884	1.7	4.95215	2.70006	1.7	4.51157	40.6	75.07	2.14675	2.1771	1.73	-0.872	-0.57	0.037	0.81	99.9
R05_02_Cat06_T333	O=C1C(Cl)CCC2=CC=C(OC)C=C21	Cl[Ru]N([C@H]([C@H](C1=CC=CC=C1)N([H])CCOCC2=CC=C(C)C=C2)C3=CC=CC=C3)S(C4=CC=C(C)C=C4)(=O)=O	333	500	0.17	27.57	-0.584	-0.148	-0.302	1745.29	6.14775	1.7	4.66175	2.70066	1.7	4.5096	40.6	75.07	2.14675	2.1771	1.73	-0.872	-0.57	0.037	0.81	99.9
R05_03_Cat06_T333	O=C1C(Cl)CCC2=CC=C(Br)C=C21	Cl[Ru]N([C@H]([C@H](C1=CC=CC=C1)N([H])CCOCC2=CC=C(C)C=C2)C3=CC=CC=C3)S(C4=CC=C(C)C=C4)(=O)=O	333	500	0.17	27.57	-0.573	-0.15	-0.306	1755.9	4.87789	1.7	4.95697	2.70026	1.7	4.51384	40.6	75.07	2.14675	2.1771	1.73	-0.872	-0.57	0.037	0.81	99.9
R05_04_Cat06_T333	O=C1C(Cl)CC2=CC=CC=C21	Cl[Ru]N([C@H]([C@H](C1=CC=CC=C1)N([H])CCOCC2=CC=C(C)C=C2)C3=CC=CC=C3)S(C4=CC=C(C)C=C4)(=O)=O	333	500	0.17	27.57	-0.58	-0.167	-0.31	1776.57	3.36393	1.7	4.92588	2.51788	1.7	3.49313	40.6	75.07	2.14675	2.1771	1.73	-0.872	-0.57	0.037	0.81	99.8
R05_05_Cat06_T333	O=C1C(Cl)CC2=CC(OC)=CC=C21	Cl[Ru]N([C@H]([C@H](C1=CC=CC=C1)N([H])CCOCC2=CC=C(C)C=C2)C3=CC=CC=C3)S(C4=CC=C(C)C=C4)(=O)=O	333	200	0.17	27.57	-0.595	-0.193	-0.306	1765.17	6.84408	1.7	4.04152	2.51879	1.7	3.4961	40.6	75.07	2.14675	2.1771	1.73	-0.872	-0.57	0.037	0.81	99.7
R05_06_Cat06_T333	O=C1C(Cl)CC2=CC(Cl)=CC=C21	Cl[Ru]N([C@H]([C@H](C1=CC=CC=C1)N([H])CCOCC2=CC=C(C)C=C2)C3=CC=CC=C3)S(C4=CC=C(C)C=C4)(=O)=O	333	500	0.17	27.57	-0.574	-0.166	-0.312	1780.07	3.37395	1.7	6.23703	2.52858	1.7	3.49011	40.6	75.07	2.14675	2.1771	1.73	-0.872	-0.57	0.037	0.81	99.5
R05_07_Cat06_T333	O=C1C(Cl)CC2=CC=CC(O)=C21	Cl[Ru]N([C@H]([C@H](C1=CC=CC=C1)N([H])CCOCC2=CC=C(C)C=C2)C3=CC=CC=C3)S(C4=CC=C(C)C=C4)(=O)=O	333	500	0.17	27.57	-0.609	-0.236	-0.301	1731.87	4.13955	1.7	4.58596	2.48562	1.7	3.49557	40.6	75.07	2.14675	2.1771	1.73	-0.872	-0.57	0.037	0.81	99.8
R05_12_Cat06_T303	O=C1C(C(OC)=O)CC2=CC=CC=C21	Cl[Ru]N([C@H]([C@H](C1=CC=CC=C1)N([H])CCOCC2=CC=C(C)C=C2)C3=CC=CC=C3)S(C4=CC=C(C)C=C4)(=O)=O	303	500	0.17	27.57	-0.594	-0.169	-0.437	1750.64	5.26576	1.7	3.29118	3.36433	1.7	4.92506	40.6	75.05	2.14777	2.17693	1.73	-0.872	-0.57	0.037	0.81	99.6
R05_14_Cat06_T333	O=C1C(C(NC(C)(C)C)=O)CC2=CC=CC=C21	Cl[Ru]N([C@H]([C@H](C1=CC=CC=C1)N([H])CCOCC2=CC=C(C)C=C2)C3=CC=CC=C3)S(C4=CC=C(C)C=C4)(=O)=O	333	500	0.17	27.57	-0.593	-0.172	-0.422	1758.83	6.45144	1.7	5.10201	3.36452	1.7	4.92604	40.6	75.07	2.14675	2.1771	1.73	-0.872	-0.57	0.037	0.81	99.9
R05_15_Cat06_T333	O=C1C(C(NC(C)(C)C)=O)CCC2=CC=CC=C21	Cl[Ru]N([C@H]([C@H](C1=CC=CC=C1)N([H])CCOCC2=CC=C(C)C=C2)C3=CC=CC=C3)S(C4=CC=C(C)C=C4)(=O)=O	333	500	0.17	27.57	-0.619	-0.165	-0.424	1694.43	6.74764	2.02059	4.6137	3.42367	1.7	4.95519	40.6	75.07	2.14675	2.1771	1.73	-0.872	-0.57	0.037	0.81	99.9
R05_08_Cat07_T333	O=C1C(Cl)CCCC2=CC=CC=C21	Cl[Ru]N([C@H]([C@H](C1=CC=CC=C1)N([H])CCOCC2=CC=C(C)C=C2)C3=CC=CC=C3)S(C)(=O)=O	333	100	0.17	27.57	-0.577	-0.16	-0.294	1731.65	5.04307	1.7	3.69729	3.43041	1.7	4.95803	40.1	75.28	2.14546	2.17619	1.73	-0.875	-0.57	0.038	0.799	97
R05_10_Cat07_T313	O=C1C(Br)CC2=CC=CC=C21	Cl[Ru]N([C@H]([C@H](C1=CC=CC=C1)N([H])CCOCC2=CC=C(C)C=C2)C3=CC=CC=C3)S(C)(=O)=O	313	500	0.17	27.57	-0.578	-0.167	-0.346	1770.74	3.36411	1.7	4.9259	2.37511	1.7	3.75486	40.1	75.28	2.14546	2.17619	1.73	-0.875	-0.57	0.038	0.799	99.5
R05_11_Cat07_T313	O=C1C(Br)CCC2=CC=CC=C21	Cl[Ru]N([C@H]([C@H](C1=CC=CC=C1)N([H])CCOCC2=CC=C(C)C=C2)C3=CC=CC=C3)S(C)(=O)=O	313	500	0.17	27.57	-0.579	-0.166	-0.367	1746.95	3.42162	1.7	4.95562	2.71296	1.7	4.50342	40.1	75.28	2.14546	2.17619	1.73	-0.875	-0.57	0.038	0.799	99.9
R05_13_Cat07_T333	O=C1C(C(OC)=O)CCCC2=CC=CC=C21	Cl[Ru]N([C@H]([C@H](C1=CC=CC=C1)N([H])CCOCC2=CC=C(C)C=C2)C3=CC=CC=C3)S(C)(=O)=O	333	200	0.17	27.57	-0.596	-0.16	-0.441	1718.19	4.21169	2.45948	5.49983	3.4401	1.7	4.96432	40.1	75.28	2.14546	2.17619	1.73	-0.875	-0.57	0.038	0.799	98.9
R05_16_Cat07_T333	O=C1C(C(NC(C)(C)C)=O)CCCC2=CC=CC=C21	Cl[Ru]N([C@H]([C@H](C1=CC=CC=C1)N([H])CCOCC2=CC=C(C)C=C2)C3=CC=CC=C3)S(C)(=O)=O	333	100	0.17	27.57	-0.618	-0.157	-0.428	1692.56	4.23415	2.54598	6.70757	3.43115	1.7	4.95808	40.1	75.28	2.14546	2.17619	1.73	-0.875	-0.57	0.038	0.799	99.9
R05_01_Cat07_T333	O=C1C(Cl)CCC2=CC=CC=C21	Cl[Ru]N([C@H]([C@H](C1=CC=CC=C1)N([H])CCOCC2=CC=C(C)C=C2)C3=CC=CC=C3)S(C)(=O)=O	333	1000	0.17	27.57	-0.582	-0.168	-0.303	1748.39	3.42884	1.7	4.95215	2.70006	1.7	4.51157	40.1	75.28	2.14546	2.17619	1.73	-0.875	-0.57	0.038	0.799	99.9
Solvent: EtOAc
Hydrogen source：FA/TEA=5:2

## Sheet: 06
Reactions_Number	S_SMILES	C_SMILES	Temperature	S_C	H_logP	H_TPSA	Atom1 NBO charge	Atom3 NBO charge	Atom4 NBO charge	C=O/C=N Vibration Frequency	Sterimol L1	Sterimol Bmin1	Sterimol Bmax1	Sterimol L2	Sterimol Bmin2	Sterimol Bmax2	C_Di_HA	Bite_Anger	C_BL1	C_BL2	Ph_distance	N_Q1	N_Q2	M_Q	%V_bur	Ee
R06_01_Cat06_T333	O=C(C1=CC=CC=C1)C2=C(C)C=CC=C2	Cl[Ru]N([C@H]([C@H](C1=CC=CC=C1)N([H])CCOCC2=CC=C(C)C=C2)C3=CC=CC=C3)S(C4=CC=C(C)C=C4)(=O)=O	333	100	0.17	27.57	0.619	-0.147	-0.155	1684.14	4.10739	1.7	4.94246	3.44162	1.7	4.9621	40.6	74.88	2.15667	2.17608	1.73	-0.875	-0.57	0.041	0.809	98
R06_02_Cat06_T313	O=C(C1=CC=CC=C1)C2=C(Cl)C=CC=C2	Cl[Ru]N([C@H]([C@H](C1=CC=CC=C1)N([H])CCOCC2=CC=C(C)C=C2)C3=CC=CC=C3)S(C4=CC=C(C)C=C4)(=O)=O	313	100	0.17	27.57	-0.597	-0.157	-0.162	1701.7	4.50646	1.7	4.97278	3.44032	1.7	4.95942	40.6	74.85	2.15734	2.17588	1.73	-0.875	-0.57	0.042	0.809	98
R06_03_Cat06_T333	O=C(C1=CC=CC=C1)C2=C(Br)C=CC=C2	Cl[Ru]N([C@H]([C@H](C1=CC=CC=C1)N([H])CCOCC2=CC=C(C)C=C2)C3=CC=CC=C3)S(C4=CC=C(C)C=C4)(=O)=O	333	100	0.17	27.57	-0.588	-0.155	-0.164	1707.26	4.71901	1.71927	4.97066	3.43884	1.7	4.95878	40.6	74.88	2.15667	2.17608	1.73	-0.875	-0.57	0.041	0.809	99
R06_04_Cat06_T333	O=C(C1=CC=CC=C1)C2=C(C(F)(F)F)C=CC=C2	Cl[Ru]N([C@H]([C@H](C1=CC=CC=C1)N([H])CCOCC2=CC=C(C)C=C2)C3=CC=CC=C3)S(C4=CC=C(C)C=C4)(=O)=O	333	100	0.17	27.57	-0.6	-0.107	-0.163	1701.6	4.92829	2.0388	4.96784	3.43953	1.7	4.95898	40.6	74.88	2.15667	2.17608	1.73	-0.875	-0.57	0.041	0.809	99
R06_05_Cat06_T333	O=C(C1=CC=CC=C1)C2=C(C)C=C(C)C=C2	Cl[Ru]N([C@H]([C@H](C1=CC=CC=C1)N([H])CCOCC2=CC=C(C)C=C2)C3=CC=CC=C3)S(C4=CC=C(C)C=C4)(=O)=O	333	100	0.17	27.57	-0.623	-0.153	-0.158	1681.24	5.93051	1.74393	4.52109	3.44148	1.7	4.96278	40.6	74.88	2.15667	2.17608	1.73	-0.875	-0.57	0.041	0.809	97
R06_06_Cat06_T333	O=C(C1=CC=CC=C1)C2=C(C)C=C(C(C)C)C=C2	Cl[Ru]N([C@H]([C@H](C1=CC=CC=C1)N([H])CCOCC2=CC=C(C)C=C2)C3=CC=CC=C3)S(C4=CC=C(C)C=C4)(=O)=O	333	100	0.17	27.57	-0.623	-0.153	-0.156	1681.64	7.04679	1.95568	4.59351	3.44146	1.7	4.96272	40.6	74.88	2.15667	2.17608	1.73	-0.875	-0.57	0.041	0.809	98
R06_07_Cat06_T303	O=C(C1=CC=CC=C1)C2=C(Cl)C=C(Cl)C=C2	Cl[Ru]N([C@H]([C@H](C1=CC=CC=C1)N([H])CCOCC2=CC=C(C)C=C2)C3=CC=CC=C3)S(C4=CC=C(C)C=C4)(=O)=O	303	100	0.17	27.57	-0.594	-0.153	-0.163	1703.57	4.50214	1.7	6.28182	3.44093	1.7	4.95863	40.6	74.86	2.15724	2.17605	1.73	-0.875	-0.57	0.042	0.809	99
R06_08_Cat06_T313	O=C(C1=CC=CC=C1)C2=C(Cl)C=CC([N+]([O-])=O)=C2	Cl[Ru]N([C@H]([C@H](C1=CC=CC=C1)N([H])CCOCC2=CC=C(C)C=C2)C3=CC=CC=C3)S(C4=CC=C(C)C=C4)(=O)=O	313	100	0.17	27.57	-0.585	-0.138	-0.166	1708.96	5.18329	1.7	5.35627	3.44167	1.7	4.95722	40.6	74.85	2.15734	2.17588	1.73	-0.875	-0.57	0.042	0.809	99
R06_09_Cat06_T283	O=C(C1=CC=CC=C1)C2=C(F)C=CC(F)=C2	Cl[Ru]N([C@H]([C@H](C1=CC=CC=C1)N([H])CCOCC2=CC=C(C)C=C2)C3=CC=CC=C3)S(C4=CC=C(C)C=C4)(=O)=O	283	100	0.17	27.57	-0.603	-0.159	-0.189	1696.23	4.06093	1.7	4.97583	3.44166	1.7	4.95982	40.6	74.85	2.15757	2.17603	1.73	-0.875	-0.57	0.042	0.809	91
R06_10_Cat06_T303	O=C(C1=CC=CC=C1)C2=C(F)C(C(F)(F)F)=CC=C2	Cl[Ru]N([C@H]([C@H](C1=CC=CC=C1)N([H])CCOCC2=CC=C(C)C=C2)C3=CC=CC=C3)S(C4=CC=C(C)C=C4)(=O)=O	303	100	0.17	27.57	-0.6	-0.16	-0.194	1698.45	4.53306	1.7	5.82949	3.44202	1.7	4.95929	40.6	74.86	2.15724	2.17605	1.73	-0.875	-0.57	0.041	0.809	90
R06_11_Cat06_T333	O=C(C1=CC=CC=C1)C2=C(F)C(F)=C(F)C(F)=C2F	Cl[Ru]N([C@H]([C@H](C1=CC=CC=C1)N([H])CCOCC2=CC=C(C)C=C2)C3=CC=CC=C3)S(C4=CC=C(C)C=C4)(=O)=O	333	100	0.17	27.57	-0.583	-0.164	-0.246	1706.17	3.93574	1.7	5.61097	3.44077	1.7	4.95605	40.6	74.88	2.15667	2.17608	1.73	-0.875	-0.57	0.041	0.809	99
R06_12_Cat06_T303	O=C(C1=CC=C(Cl)C=C1)C2=C(Cl)C=CC=C2	Cl[Ru]N([C@H]([C@H](C1=CC=CC=C1)N([H])CCOCC2=CC=C(C)C=C2)C3=CC=CC=C3)S(C4=CC=C(C)C=C4)(=O)=O	303	100	0.17	27.57	-0.593	-0.159	-0.159	1704.73	3.4505	1.7	6.26842	4.50631	1.7	4.9721	40.6	74.86	2.15724	2.17605	1.73	-0.875	-0.57	0.042	0.809	97
R06_13_Cat06_T313	O=C(C1=CC=C(F)C=C1)C2=C(Cl)C=CC=C2	Cl[Ru]N([C@H]([C@H](C1=CC=CC=C1)N([H])CCOCC2=CC=C(C)C=C2)C3=CC=CC=C3)S(C4=CC=C(C)C=C4)(=O)=O	313	100	0.17	27.57	-0.599	-0.157	-0.175	1701.07	4.50548	1.7	4.97241	3.44153	1.7	5.56957	40.6	74.85	2.15734	2.17588	1.73	-0.875	-0.57	0.042	0.809	97
R06_15_Cat06_T303	O=C(C1=CC=CC=C1)C2=CC(Cl)=C(Cl)C=C2	Cl[Ru]N([C@H]([C@H](C1=CC=CC=C1)N([H])CCOCC2=CC=C(C)C=C2)C3=CC=CC=C3)S(C4=CC=C(C)C=C4)(=O)=O	303	100	0.17	27.57	-0.619	-0.149	-0.154	1682.76	4.70678	1.7	6.28065	3.44364	1.7	4.96043	40.6	74.86	2.15724	2.17605	1.73	-0.875	-0.57	0.042	0.809	76
R06_16_Cat06_T303	O=C(C1=CC=CC=C1)C2=CC(F)=C(F)C=C2	Cl[Ru]N([C@H]([C@H](C1=CC=CC=C1)N([H])CCOCC2=CC=C(C)C=C2)C3=CC=CC=C3)S(C4=CC=C(C)C=C4)(=O)=O	303	100	0.17	27.57	-0.612	-0.132	-0.156	1686.23	4.03292	1.7	5.57689	3.44226	1.7	4.96134	40.6	74.86	2.15724	2.17605	1.73	-0.875	-0.57	0.042	0.809	77
R06_17_Cat06_T303	O=C(C1=CC=CC=C1)C2=CC=C([N+]([O-])=O)C=C2	Cl[Ru]N([C@H]([C@H](C1=CC=CC=C1)N([H])CCOCC2=CC=C(C)C=C2)C3=CC=CC=C3)S(C4=CC=C(C)C=C4)(=O)=O	303	100	0.17	27.57	-0.619	-0.147	-0.153	1684.08	3.42422	1.7	6.39441	3.44345	1.7	4.95945	40.6	74.86	2.15724	2.17605	1.73	-0.875	-0.57	0.042	0.809	76
R06_18_Cat06_T303	O=C(C1=CC=CC=C1)C2=CC([N+]([O-])=O)=C(Cl)C=C2	Cl[Ru]N([C@H]([C@H](C1=CC=CC=C1)N([H])CCOCC2=CC=C(C)C=C2)C3=CC=CC=C3)S(C4=CC=C(C)C=C4)(=O)=O	303	100	0.17	27.57	-0.604	-0.102	-0.159	1690.59	5.13402	1.7	6.29372	3.44472	1.7	4.95946	40.6	74.86	2.15724	2.17605	1.73	-0.875	-0.57	0.042	0.809	93
R06_19_Cat06_T283	O=C(C1=CC=CC=C1)C2=CC(F)=C(F)C(F)=C2	Cl[Ru]N([C@H]([C@H](C1=CC=CC=C1)N([H])CCOCC2=CC=C(C)C=C2)C3=CC=CC=C3)S(C4=CC=C(C)C=C4)(=O)=O	283	100	0.17	27.57	-0.606	-0.133	-0.158	1691.19	4.02636	1.7	5.58316	3.44273	1.7	4.96039	40.6	74.86	2.15724	2.17605	1.73	-0.875	-0.57	0.042	0.809	95
R06_20_Cat06_T303	O=C(C1=CC=CC=C1)C2=CC([N+]([O-])=O)=CC([N+]([O-])=O)=C2	Cl[Ru]N([C@H]([C@H](C1=CC=CC=C1)N([H])CCOCC2=CC=C(C)C=C2)C3=CC=CC=C3)S(C4=CC=C(C)C=C4)(=O)=O	303	100	0.17	27.57	-0.612	-0.129	-0.155	1690.39	5.17632	1.7	5.75124	3.44472	1.7	4.95781	40.6	74.86	2.15724	2.17605	1.73	-0.875	-0.57	0.042	0.809	99
R06_24_Cat06_T303	O=C(C1=CC=C(OC)C=C1)C2=CC=C([N+]([O-])=O)C=C2	Cl[Ru]N([C@H]([C@H](C1=CC=CC=C1)N([H])CCOCC2=CC=C(C)C=C2)C3=CC=CC=C3)S(C4=CC=C(C)C=C4)(=O)=O	303	100	0.17	27.57	-0.632	-0.144	-0.186	1676.3	6.88597	1.7	4.02276	3.42511	1.7	6.39602	40.6	74.86	2.15724	2.17605	1.73	-0.875	-0.57	0.042	0.809	79
R06_25_Cat06_T303	O=C(C1=CC=C(OC)C=C1)C2=CC([N+]([O-])=O)=CC([N+]([O-])=O)=C2	Cl[Ru]N([C@H]([C@H](C1=CC=CC=C1)N([H])CCOCC2=CC=C(C)C=C2)C3=CC=CC=C3)S(C4=CC=C(C)C=C4)(=O)=O	303	100	0.17	27.57	-0.62	-0.096	-0.189	1681.2	5.17823	1.7	5.75391	6.88468	1.7	4.02323	40.6	74.86	2.15724	2.17605	1.73	-0.875	-0.57	0.042	0.809	99
Solvent: FA/TEA=5:2
Hydrogen source：FA/TEA=5:2

[truncated: 18 more sheets: 07, 08, 09, 10, 11, 12, 13, 14, 15, 16, 17, 18, 19, 20, 21, 22, Case, Reactions]
