# Supplementary material for: Prediction of the enantiomeric excess value for asymmetric transfer hydrogenation based on machine learning
Source: Royal Society of Chemistry journal article supplement (doi:10.1039/d2qo01680j), 2023-01-01
Supplement: d2qo01680j2.pdf [file d2qo01680j2.pdf]

## Supplementary Information

### Prediction of Enantiomeric Excess Values for Asymmetric Transfer Hydrogenation Based on Machine Learning

Ben Gao,<sup>a\*</sup> Yuqi Chang,<sup>a</sup> Wenjun Tang<sup>a, b</sup>

- a. School of Chemistry and Material Sciences, Hangzhou Institute of Advanced Study, University of Chinese Academy of Science, 1 Sub-lane Xiangshan, Hangzhou 310024(China);
- b. State Key Laboratory of Bio-Organic and Natural Products Chemistry, Shanghai Institute of Organic Chemistry, Chinese Academy of Sciences, 345 Ling Ling Rd, Shanghai 200032;

E-mail: gaoben20@mailsucas.ac.cn

## Content

|                                                      |    |
|------------------------------------------------------|----|
| 1. Details for Descriptors .....                     | 3  |
| 1.1 Substrate.....                                   | 3  |
| 1.2 Catalyst .....                                   | 3  |
| 1.3 Conditions .....                                 | 4  |
| 2. Computational Methods and Programming Detail..... | 5  |
| 3. Machine Learning Model.....                       | 6  |
| 4. Dataset and Code .....                            | 6  |
| 4.1 Catalyst family .....                            | 6  |
| 4.2 Substrate family .....                           | 7  |
| 5. Reactions.....                                    | 19 |

# 1. Details for Descriptors

## 1.1 Substrate

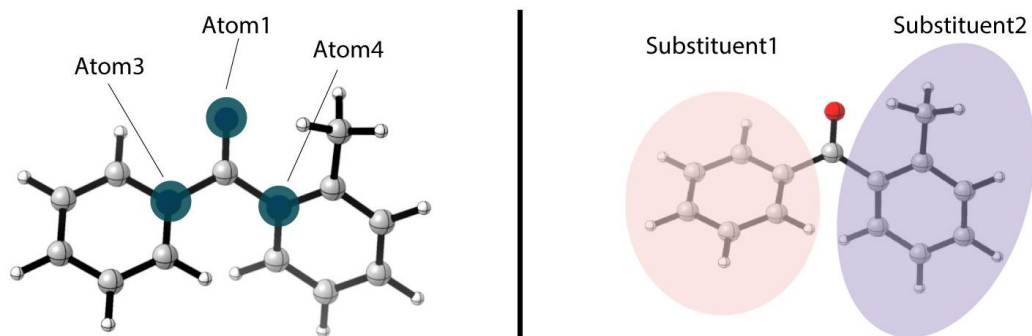

| Symbol                      | Notes                                                                      |
|-----------------------------|----------------------------------------------------------------------------|
| Atom1 NBO charge            | NBO charge of oxygen or nitrogen atom (atom1)                              |
| Atom3 NBO charge            | NBO charge of atom 3 and atom 4, whichever is numerically larger           |
| Atom4 NBO charge            | NBO charge of atom 3 and atom 4, whichever is numerically smaller          |
| C=O/C=N Vibration Frequency | The vibration frequency with the largest vibration amplitude of C=O or C=N |
| Sterimol L1                 | $Max(L+B_{max})$ corresponds to the sterimol parameter of the substituent  |
| Sterimol Bmin1              | $Max(L+B_{min})$ corresponds to the sterimol parameter of the substituent  |
| Sterimol Bmax1              | $Max(L+B_{max})$ corresponds to the sterimol parameter of the substituent  |
| Sterimol L2                 | $Min(L+B_{max})$ corresponds to the sterimol parameter of the substituent  |
| Sterimol Bmin2              | $Min(L+B_{min})$ corresponds to the sterimol parameter of the substituent  |
| Sterimol Bmax2              | $Min(L+B_{max})$ corresponds to the sterimol parameter of the substituent  |

## 1.2 Catalyst

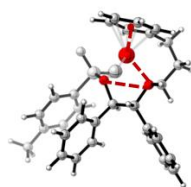

Dihedral Angle  
Symbol: C\_Di\_HA

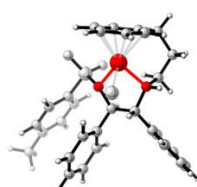

Bite Angle

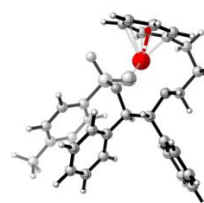

Distance  
Symbol: Ph\_distance

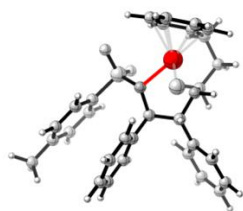

**Bond Length**  
Symbol: C\_BL1

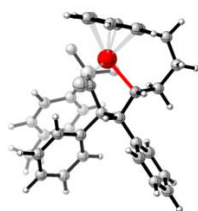

**Bond Length**  
Symbol: C\_BL2

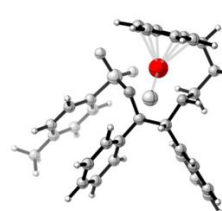

**Buried volume**  
Symbol: %V\_bur

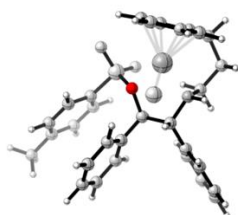

**NBO Charge**  
Symbol: N\_Q1

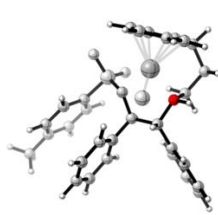

**NBO Charge**  
Symbol: N\_Q2

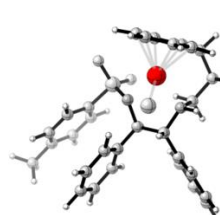

**NBO Charge**  
Symbol: M\_Q (M=Ru/Rh)

| Symbol      | Notes                                                   |
|-------------|---------------------------------------------------------|
| C_Di_HA     | Catalyst dihedral angle                                 |
| Bite Angle  | Bite angle between nitrogen atoms and metal atom        |
| Ph_distance | Distance from metal atom to the center of aromatic ring |
| C_BL1       | Distance from metal atom to nitrogen atom               |
| C_BL2       | Distance from metal atom to nitrogen atom               |
| %V_bur      | Buried volume of metal atoms (%)                        |
| N_Q1        | NBO charge of chiral diamine nitrogen atom              |
| N_Q2        | NBO charge of chiral diamine nitrogen atom              |
| M_Q         | NBO charge of metal atoms                               |

Notes:

Structure optimization with reference to the single crystal structure (X-ray) of the catalyst.<sup>1-2</sup>

## References:

1. A. Fujii, S. Hashiguchi, N. Uematsu, T. Ikariya, R. Noyori, *J. Am. Chem. Soc.*, 1996, **118**, 2521-2522.
2. J. Hannedouche, G. J. Clarkson, M. Wills, *J. Am. Chem. Soc.*, 2004, **126**, 986-987.

## 1.3 Conditions

| Symbol      | Notes                                                      |
|-------------|------------------------------------------------------------|
| Temperature | Numerical value of reaction temperature                    |
| S_C         | Ratio of substrate to catalyst                             |
| H_logP      | Partition coefficient (Hydrogen source)                    |
| H_TPSA      | Topological molecular polar surface area (Hydrogen source) |

## 2. Computational Methods and Programming Detail

All the DFT calculations in this work were performed with Gaussian 16.<sup>1</sup> Geometries of chiral catalyst families and substrates at the SMD(solvent) model, B3LYP-D3(BJ) functional<sup>2</sup> with the basis set lanz2dz for metal atom,<sup>3</sup> 6-31G\*\* for other main group atoms.<sup>4</sup>

The data processing and computing software used in this study are as follows.

Download and install the following programs:

- Python 3.7 (Download at <https://www.anaconda.com/download/>)
- Multiwfn 3.8 (We use this software to convert log files into xyz files.)<sup>5</sup>
- DBSTEP (Calculate Sterimol parameters, %Buried Volume)<sup>6</sup>
- CYLview (Draw molecular diagrams)<sup>7</sup>
- RDkit package<sup>8</sup>

### References:

1. Frisch, M. J.; Trucks, G. W.; Schlegel, H. B.; Scuseria, G. E.; Robb, M. A.; Cheeseman, J. R.; Scalmani, G.; Barone, V.; Petersson, G. A.; Na-katsuji, H.; Li, X.; Caricato, M.; Marenich, A. V.; Bloino, J.; Janesko, B. G.; Gomperts, R.; Mennucci, B.; Hratchian, H. P.; Ortiz, J. V.; Izmaylov, A. F.; Sonnenberg, J. L.; Williams-Young, D.; Ding, F.; Lipparini, F.; Egidi, F.; Goings, J.; Peng, B.; Petrone, A.; Henderson, T.; Ranasinghe, D.; Zakrzewski, V. G.; Gao, J.; Rega, N.; Zheng, G.; Liang, W.; Hada, M.; Ehara, M.; Toyota, K.; Fukuda, R.; Hasegawa, J.; Ishida, M.; Nakajima, T.; Honda, Y.; Kitao, O.; Nakai, H.; Vreven, T.; Throssell, K.; Montgomery, J. A. Jr.; Peralta, J. E.; Ogliaro, F.; Bearpark, M. J.; Heyd, J. J.; Brothers, E. N.; Kudin, K. N.; Staroverov, V. N.; Keith, T. A.; Kobayashi, R.; Normand, J.; Raghavachari, K.; Rendell, A. P.; Burant, J. C.; Iyengar, S. S.; Tomasi, J.; Cossi, M.; Millam, J. M.; Klene, M.; Adamo, C.; Cam-mi, R.; Ochterski, J. W.; Martin, R. L.; Morokuma, K.; Farkas, O.; Foresman, J. B.; Fox, D. J. Gaussian 16, Revision A.03, Gaussian, Inc., Wallingford CT, 2016.
2. (a) Becke, A. D., *Phys. Rev. A*, 1988, **38**, 3098-3100; (b) Lee, C.; Yang, W.; Parr, R. G., *Phys. Rev. B*, 1988, **37**, 785-789; (c) Miehlich, B.; Savin, A.; Stoll, H.; Preuss, H., *Chem. Phys. Lett.*, 1989, **157**, 200-206; (d) Grimme, S.; Ehrlich, S.; Goerigk, L., *J. Comput. Chem.*, 2011, **32**, 1456-1465.
3. (a) Hay, P. J.; Wadt, W. R., *J. Chem. Phys.*, 1985, **82**, 270-283; (b) Wadt, W. R.; Hay, P. J., *J. Chem. Phys.*, 1985, **82**, 284-298; (c) Hay, P. J.; Wadt, W. R., *J. Chem. Phys.*, 1985, **82**, 299-310.
4. (a) Petersson, G. A.; Bennett, A.; Tensfeldt, T. G.; Al-Laham, M. A.; Shirley, W. A.; Mantzaris, J., *J. Chem. Phys.*, 1988, **89**, 2193-2218; (b) Petersson, G. A.; Al-Laham, M. A., *J. Chem. Phys.*, 1991, **94**, 6081-6090..
5. Tian Lu, Feiwu Chen, *J. Comput. Chem.*, 33, 580-592 (2012)
6. <https://github.com/patonlab/DBSTEP>
7. CYLview, 1.0b; Legault, C. Y., Université de Sherbrooke, 2009 (<http://www.cylview.org>)
8. RDKit: open-source chemoinformatics and machine learning.  
<http://www.rdkit.org>.

### 3. Machine Learning Model

| Model    | Parameters                                             |
|----------|--------------------------------------------------------|
| SVM      | kernel='rbf'                                           |
| KNN      | k=2                                                    |
| DT       | random_state = 42                                      |
| RF       | n_estimators = 750, criterion='mse', random_state = 42 |
| AdaBoost | n_estimators = 100, random_state = 42                  |
| XGB      | n_estimators = 20, random_state = 42                   |

Note: The above settings are optimized with hyperparameters.

### 4. Dataset and Code

The dataset is in the file **dataset.xlsx**. The code is in the **SVM42.html**, **KNN42.html**, **DT42.html**, **RF42.html**, **AdaBoost42.html**, **XGB42.html** ([https://github.com/UchihaBen/ML\\_ATH](https://github.com/UchihaBen/ML_ATH)).

#### 4.1 Catalyst family

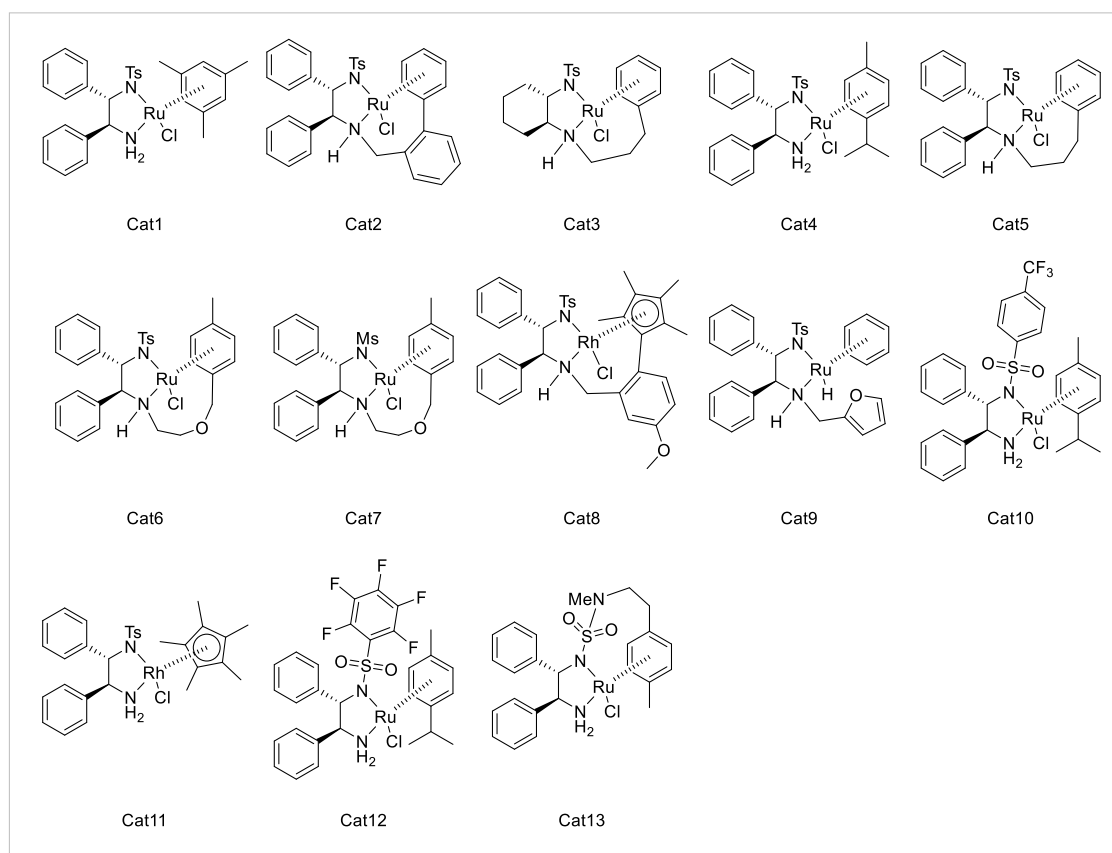

## 4.2 Substrate family

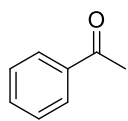

01\_01

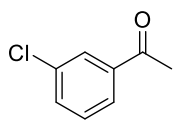

01\_02

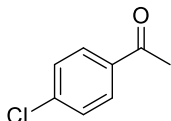

01\_03

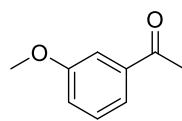

01\_04

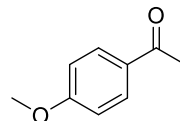

01\_05

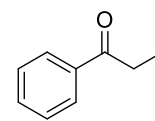

01\_06

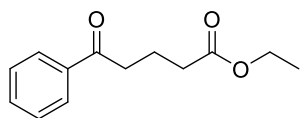

01\_07

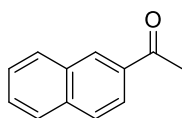

01\_08

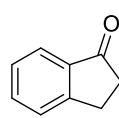

01\_09

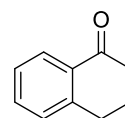

01\_10

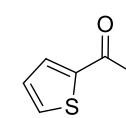

01\_11

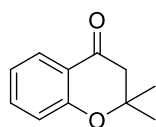

01\_12

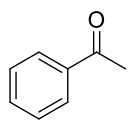

02\_01

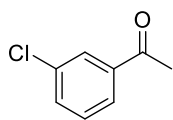

02\_02

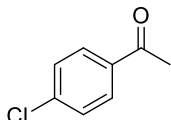

02\_03

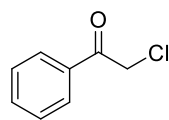

02\_04

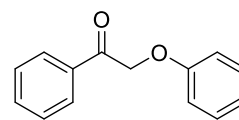

02\_05

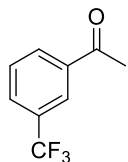

02\_06

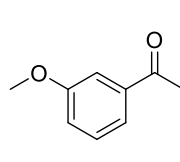

02\_07

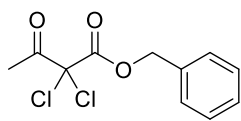

03\_01

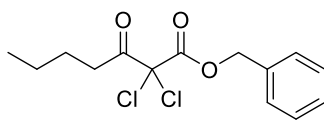

03\_02

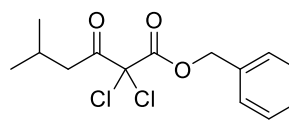

03\_04

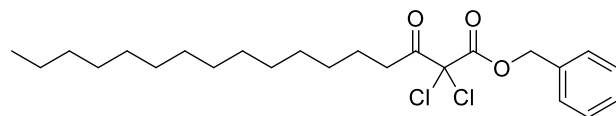

03\_03

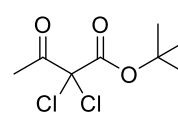

03\_05

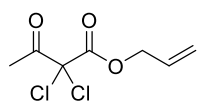

03\_06

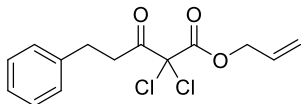

03\_07

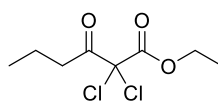

03\_08

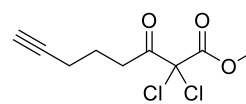

03\_09

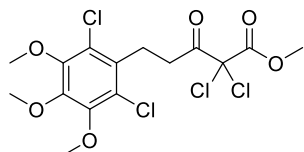

03\_10

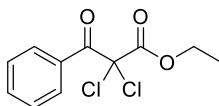

03\_11

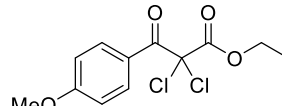

03\_12

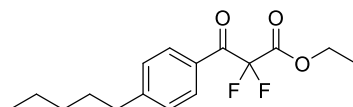

03\_13

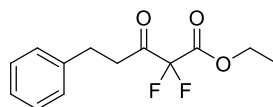

03\_14

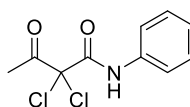

03\_15

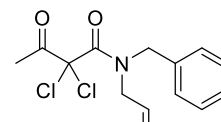

03\_16

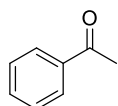

04\_01

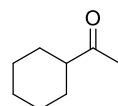

04\_02

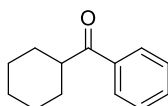

04\_03

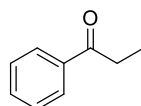

04\_04

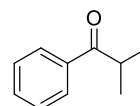

04\_05

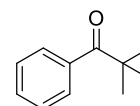

04\_06

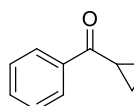

04\_07

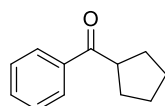

04\_08

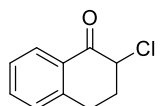

05\_01

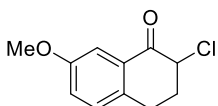

05\_02

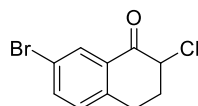

05\_03

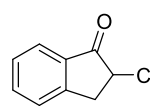

05\_04

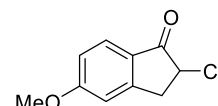

05\_05

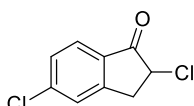

05\_06

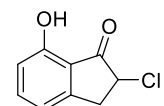

05\_07

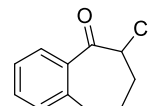

05\_08

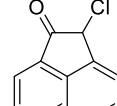

05\_09

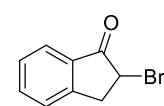

05\_10

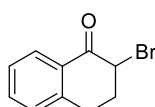

05\_11

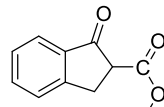

05\_12

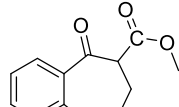

05\_13

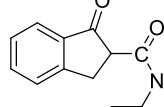

05\_14

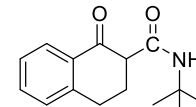

05\_15

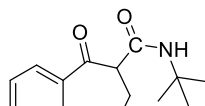

05\_16



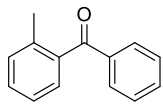

06\_01

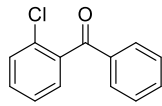

06\_02

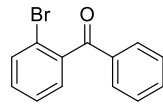

06\_03

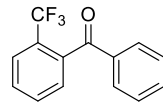

06\_04

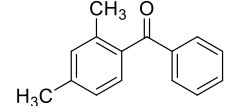

06\_05

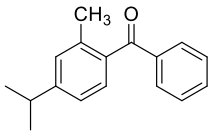

06\_06

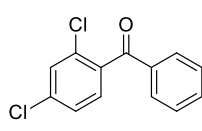

06\_07

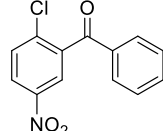

06\_08

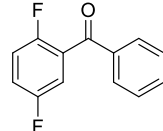

06\_09

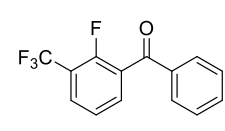

06\_10

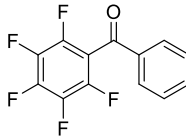

06\_11

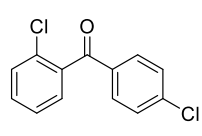

06\_12

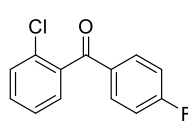

06\_13

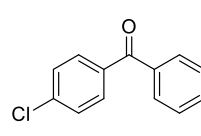

06\_14

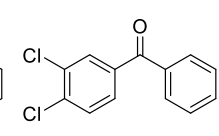

06\_15

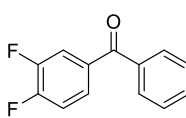

06\_16

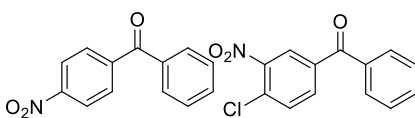

06\_17

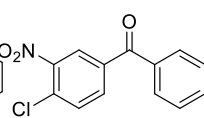

06\_18

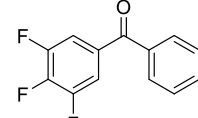

06\_19

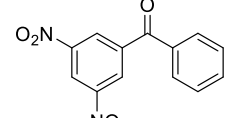

06\_20

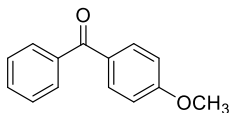

06\_21

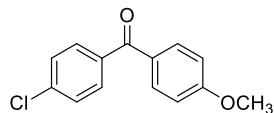

06\_22

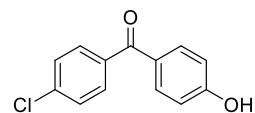

06\_23

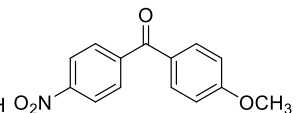

06\_24

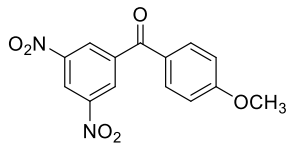

06\_25

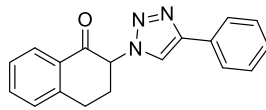

07\_01

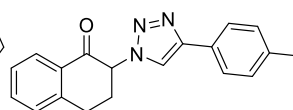

07\_02

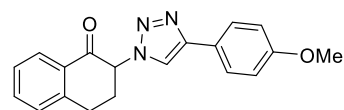

07\_03

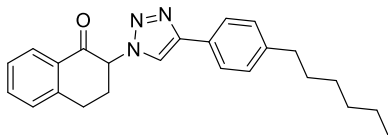

07\_04

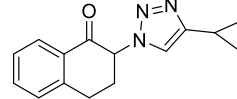

07\_05

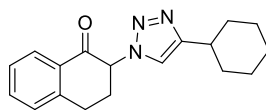

07\_06

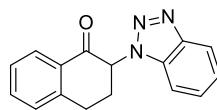

07\_07

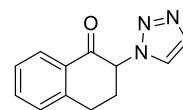

07\_08

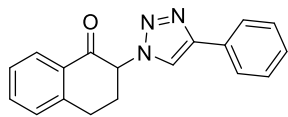

07\_09

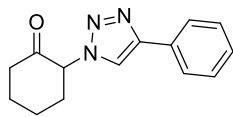

07\_10

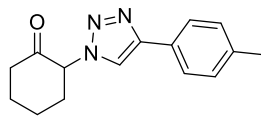

07\_11

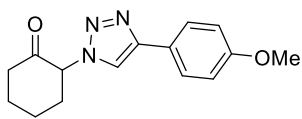

07\_12

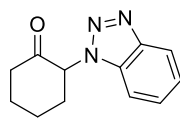

07\_13

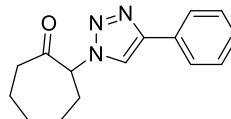

07\_14

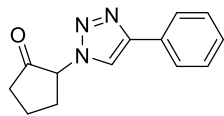

07\_15

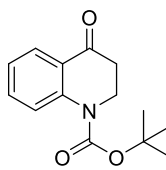

08\_01

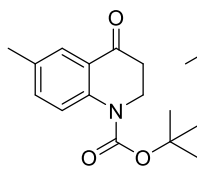

08\_02

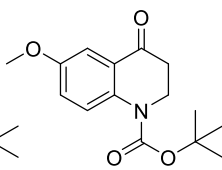

08\_03

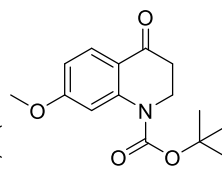

08\_04

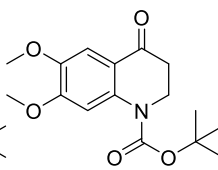

08\_05

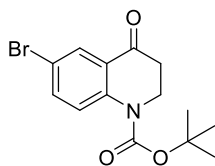

08\_06

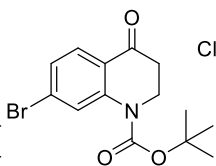

08\_07

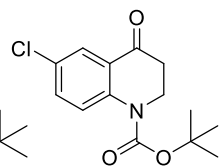

08\_08

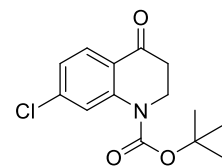

08\_09

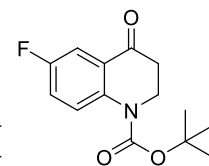

08\_10

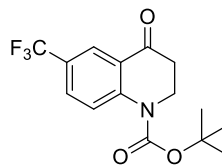

08\_11

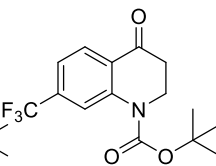

08\_12

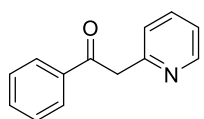

09\_01

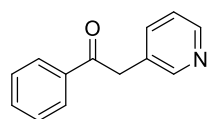

09\_02

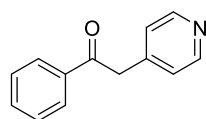

09\_03

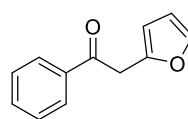

09\_04

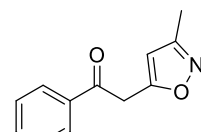

09\_05

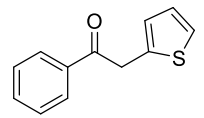

09\_06

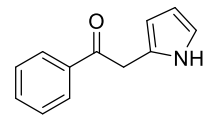

09\_07

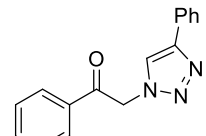

09\_08

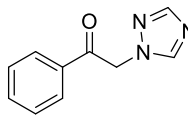

09\_09

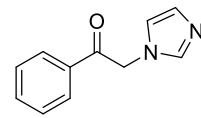

09\_10

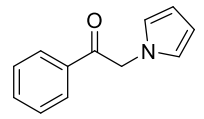

09\_11

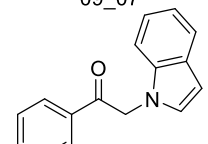

09\_12

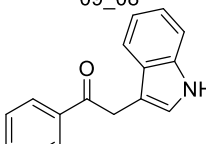

09\_13

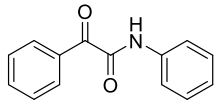

10\_01

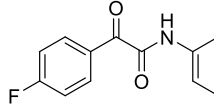

10\_02

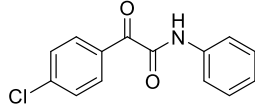

10\_03

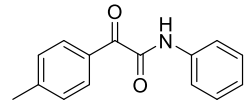

10\_04

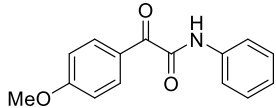

10\_05

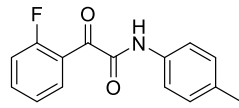

10\_06

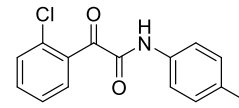

10\_07

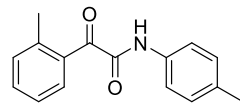

10\_08

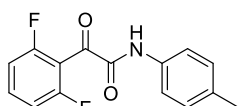

10\_09

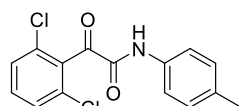

10\_10

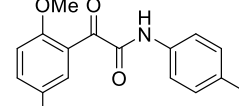

10\_11

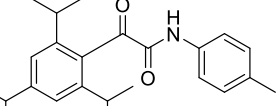

10\_12

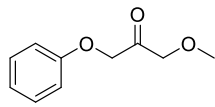

11\_01

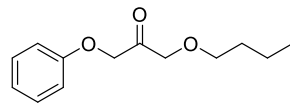

11\_02

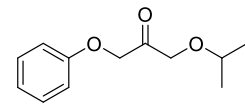

11\_03

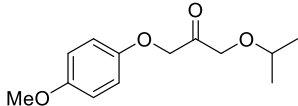

11\_04

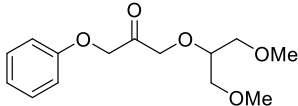

11\_05

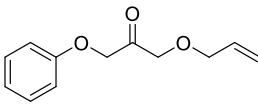

11\_06

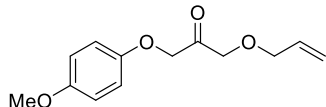

11\_07

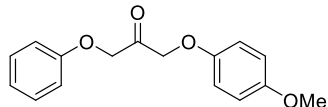

11\_08

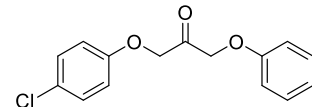

11\_09

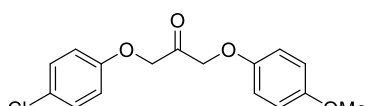

11\_10

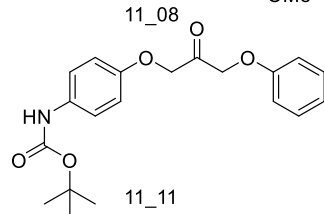

11\_11

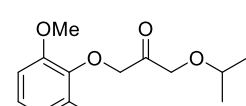

11\_12

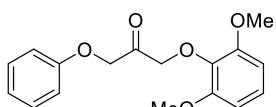

11\_13

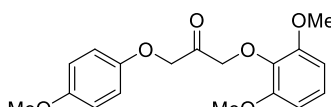

11\_14

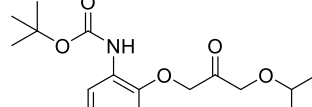

11\_15

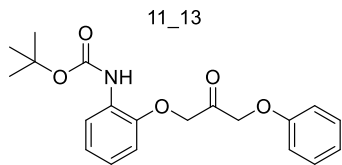

11\_16

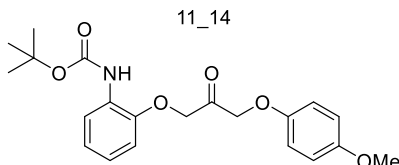

11\_17

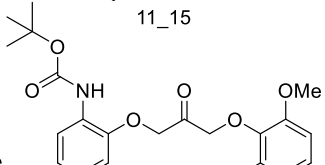

11\_18

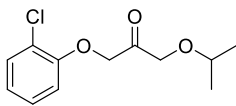

11\_19

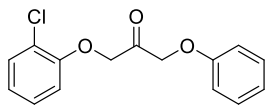

11\_20

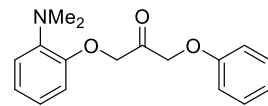

11\_21

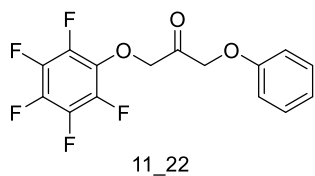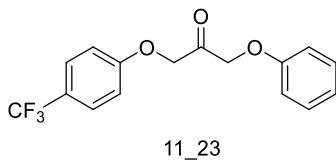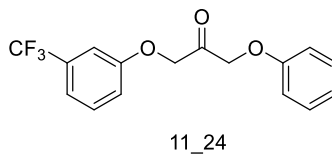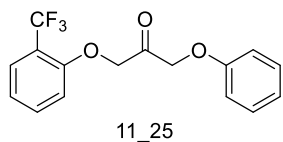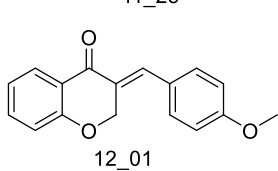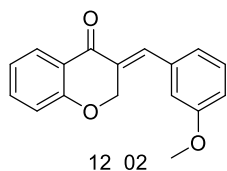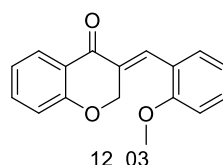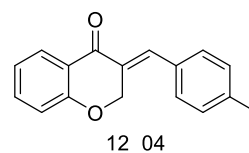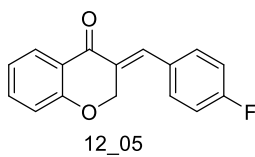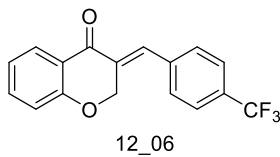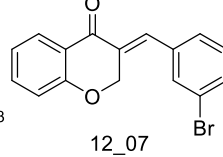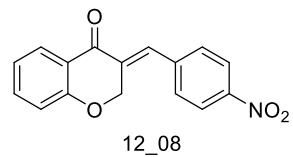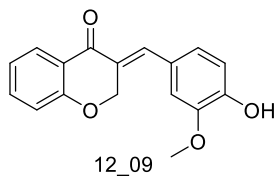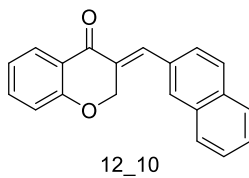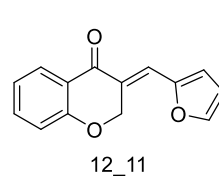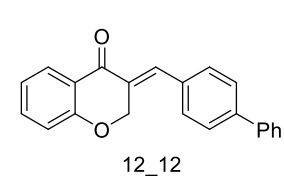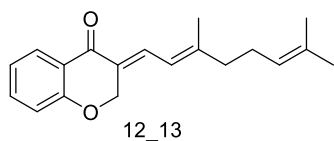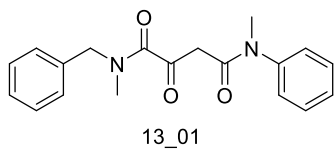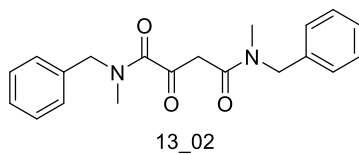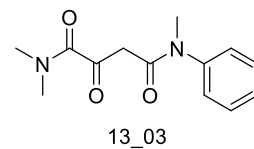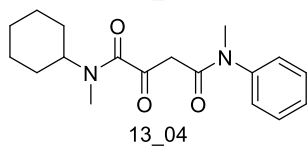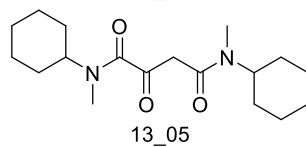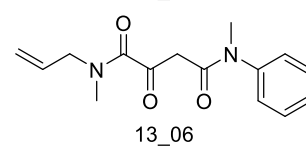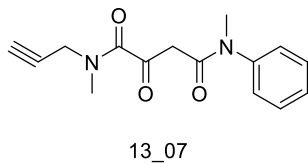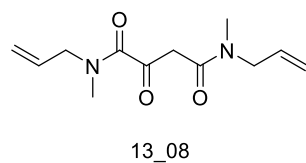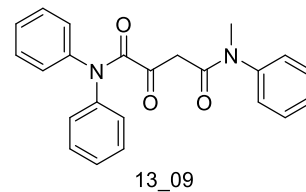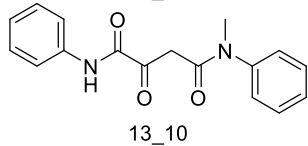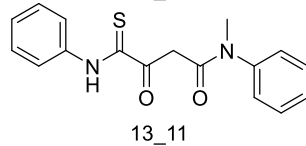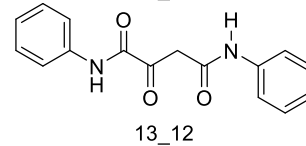

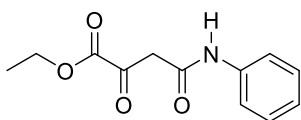

13\_13

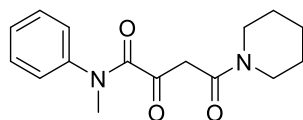

13\_14

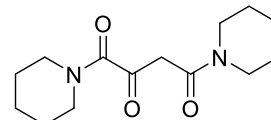

13\_15

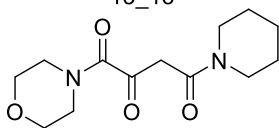

13\_16

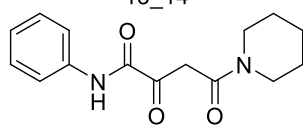

13\_17

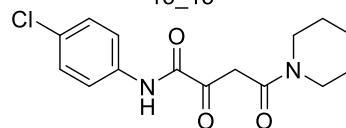

13\_18

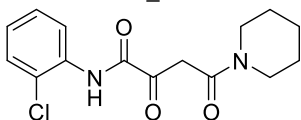

13\_19

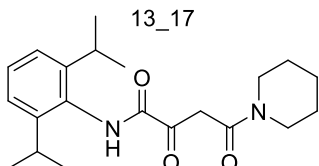

13\_20

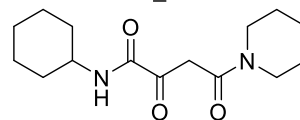

13\_21

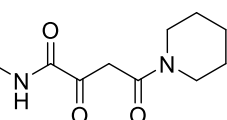

13\_22

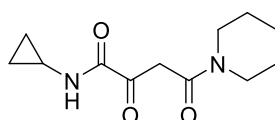

13\_23

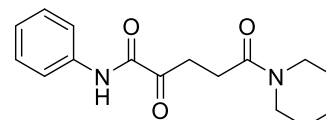

13\_24

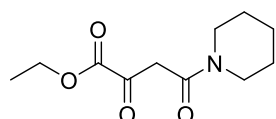

13\_25

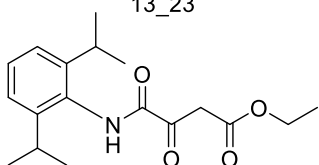

13\_26

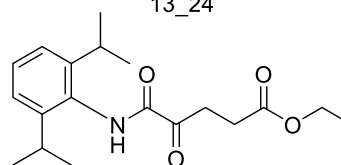

13\_27

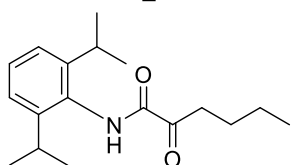

13\_28

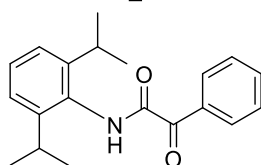

13\_29

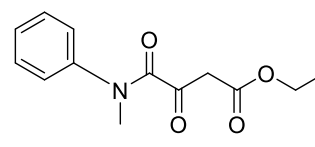

13\_30

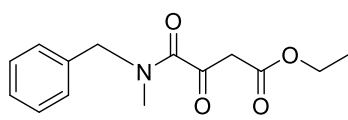

13\_31

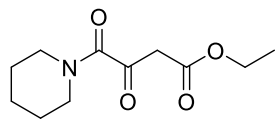

13\_32

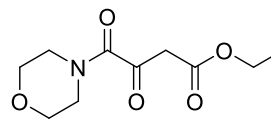

13\_33

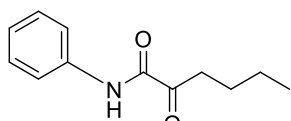

13\_34

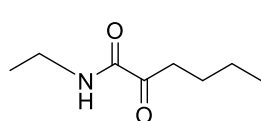

13\_35

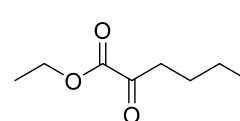

13\_36

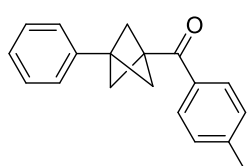

14\_01

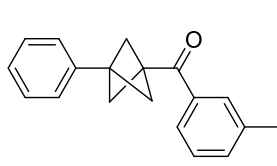

14\_02

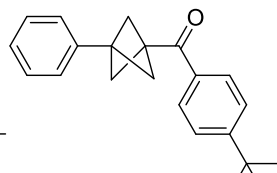

14\_03

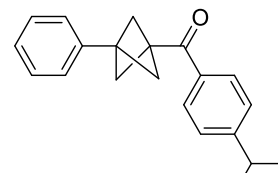

14\_04

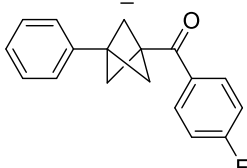

14\_05

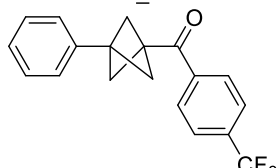

14\_06

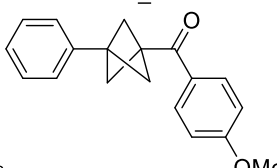

14\_07

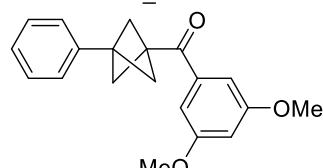

14\_08

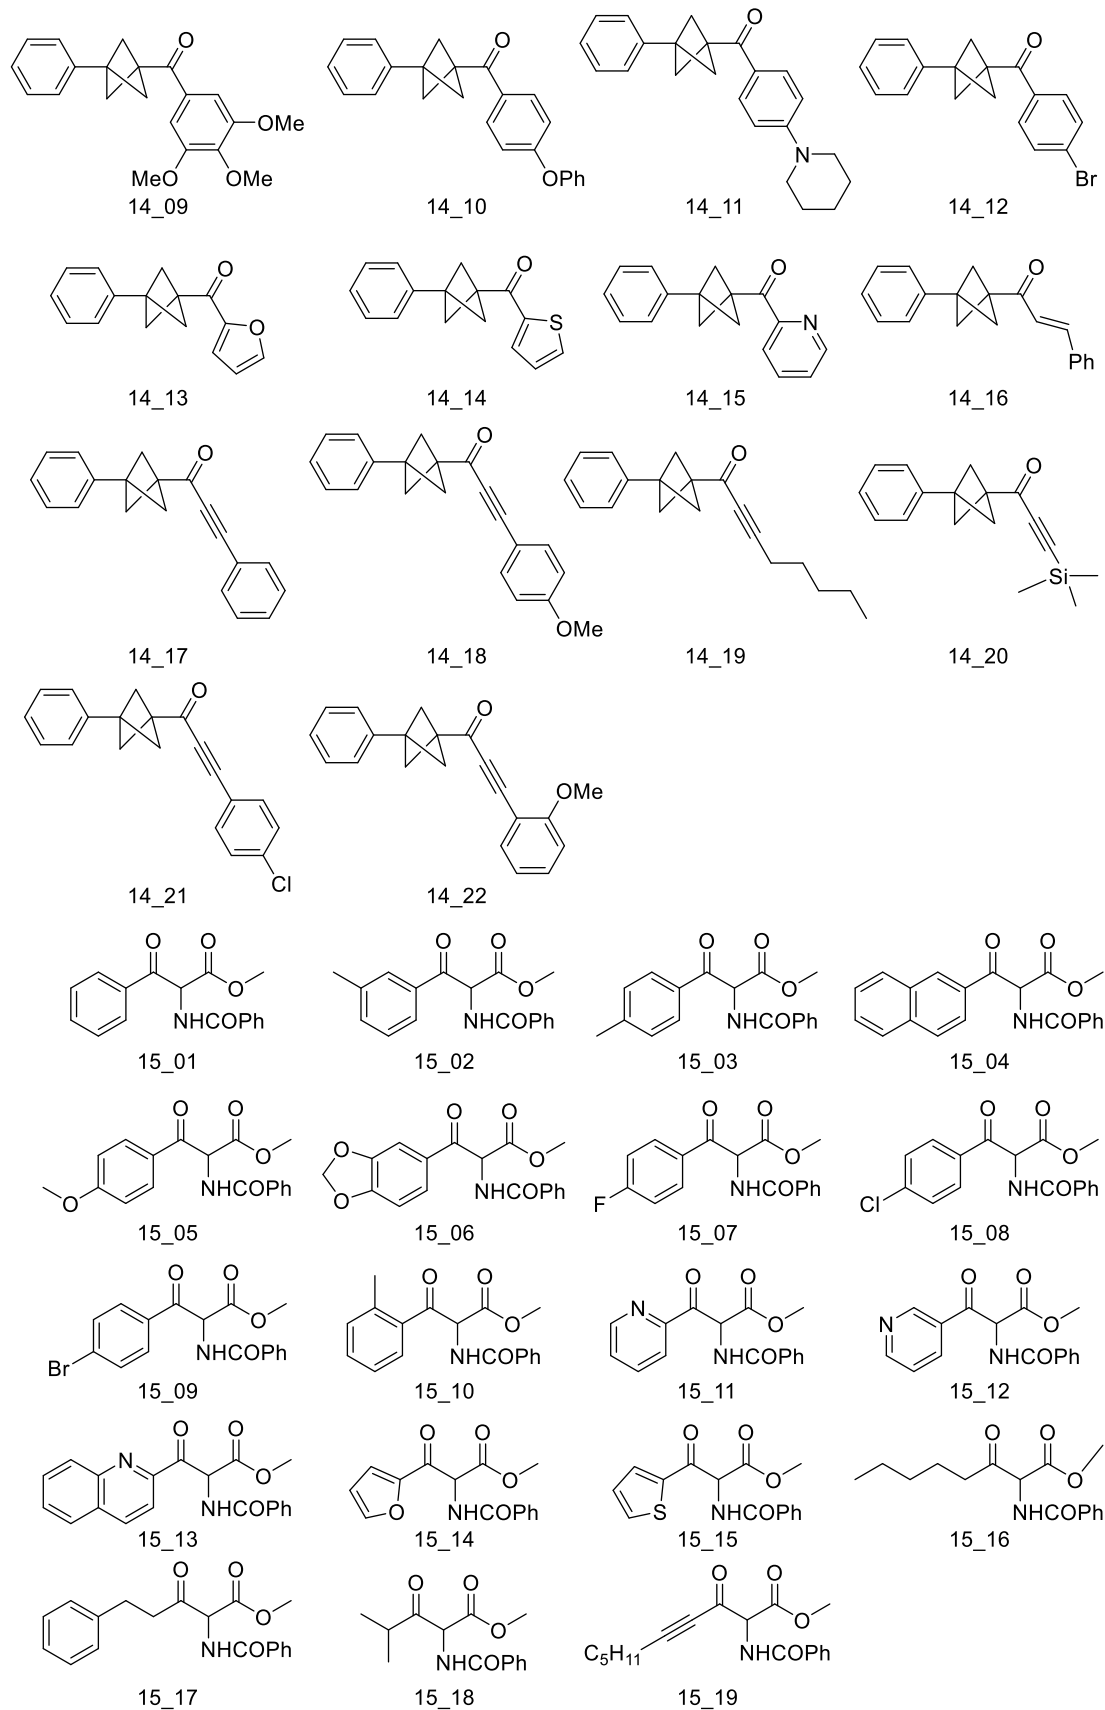

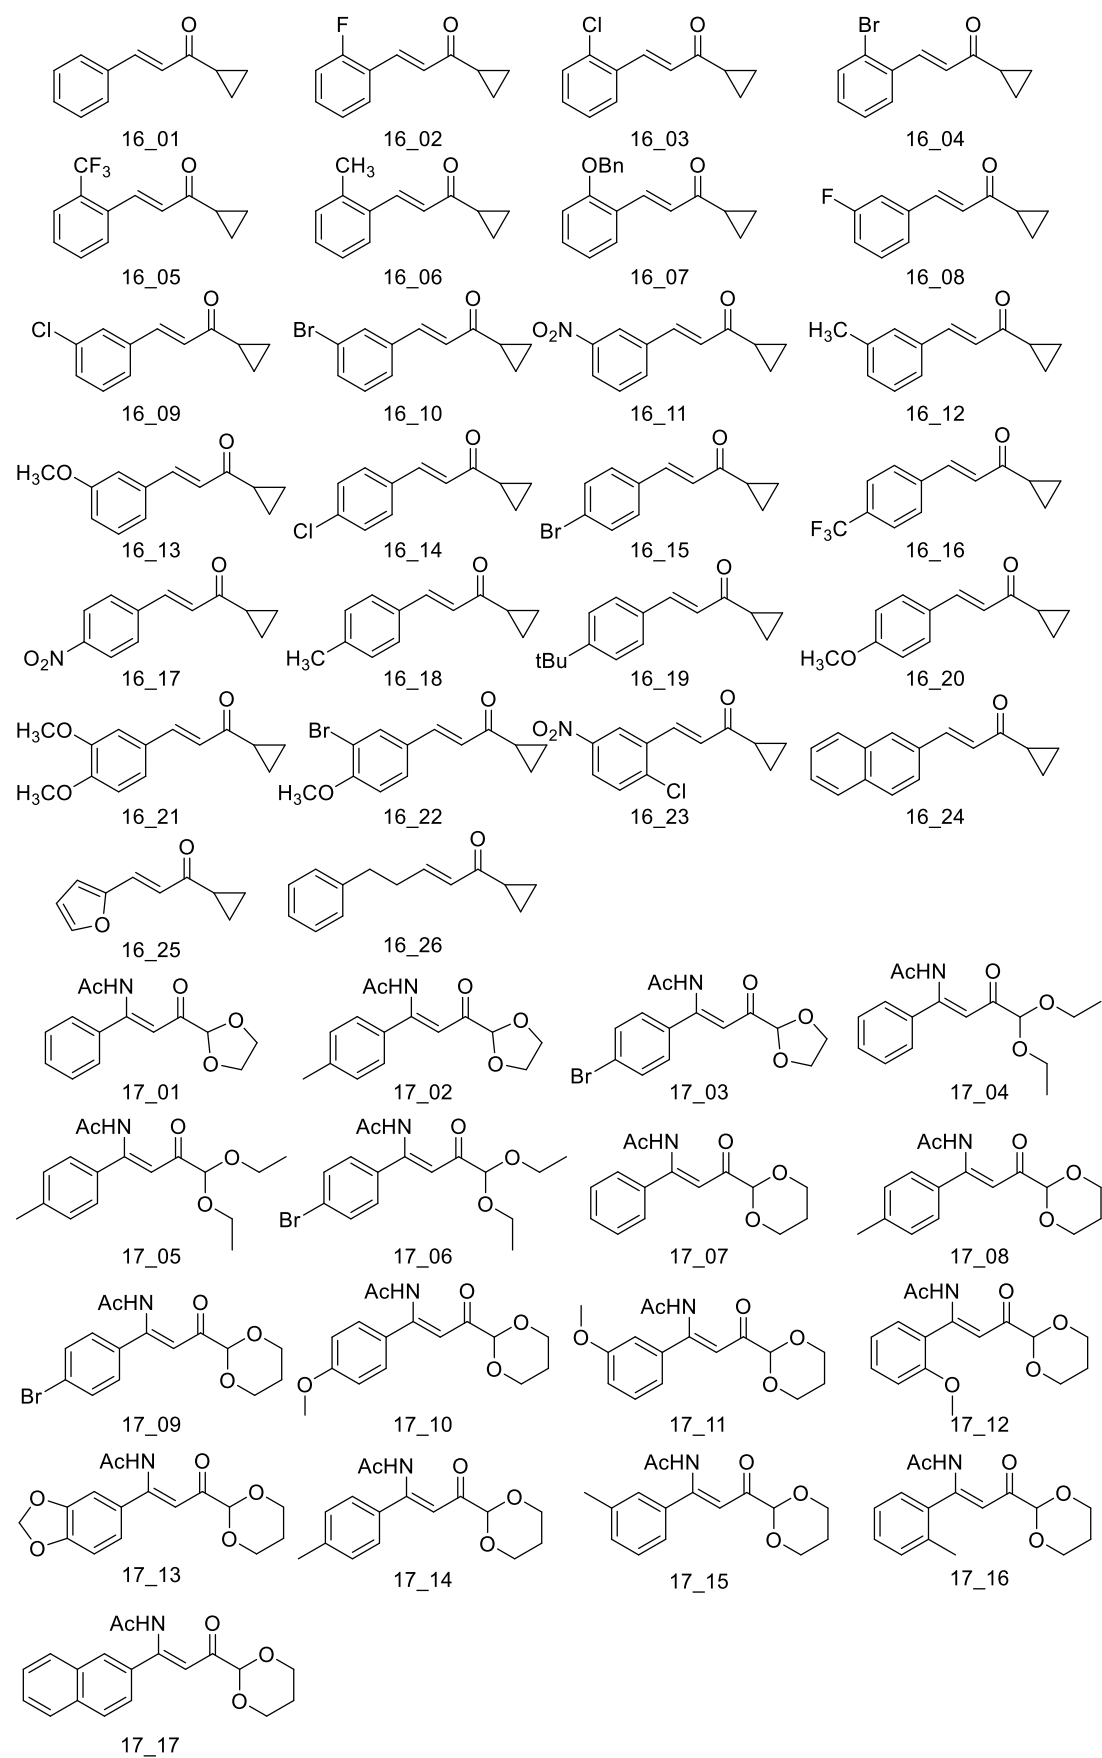

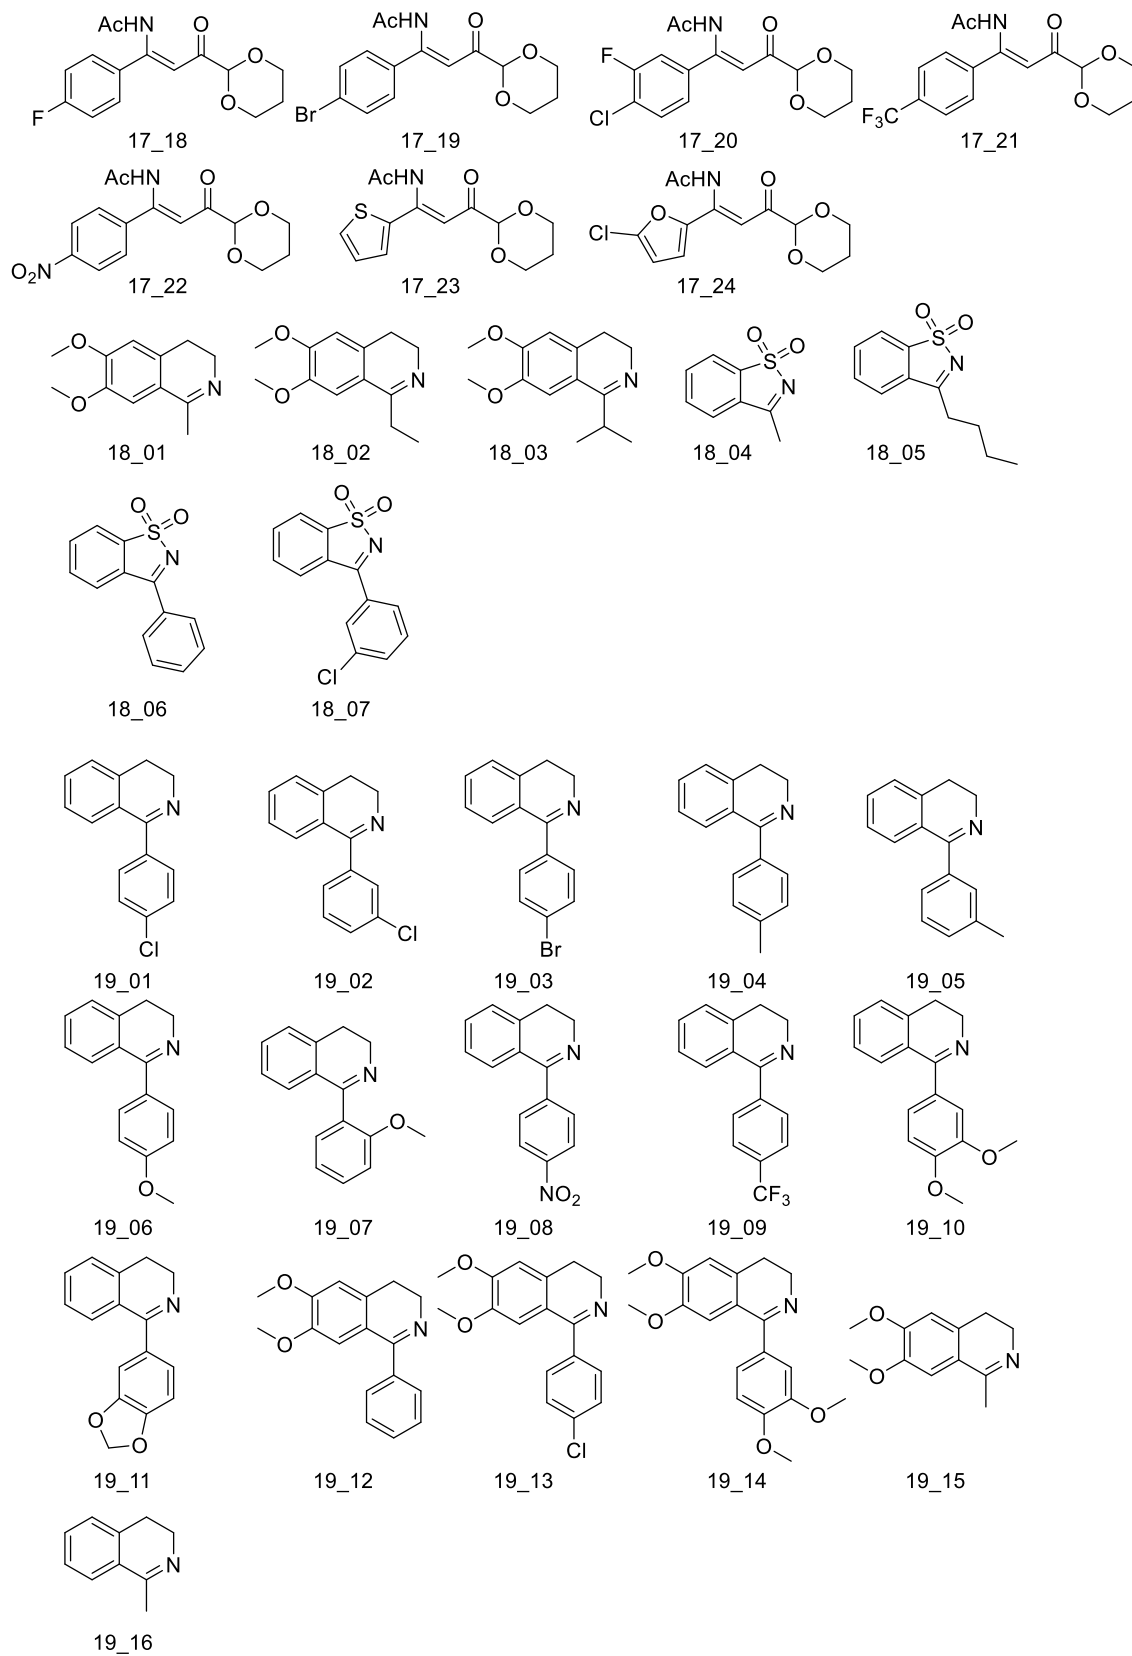



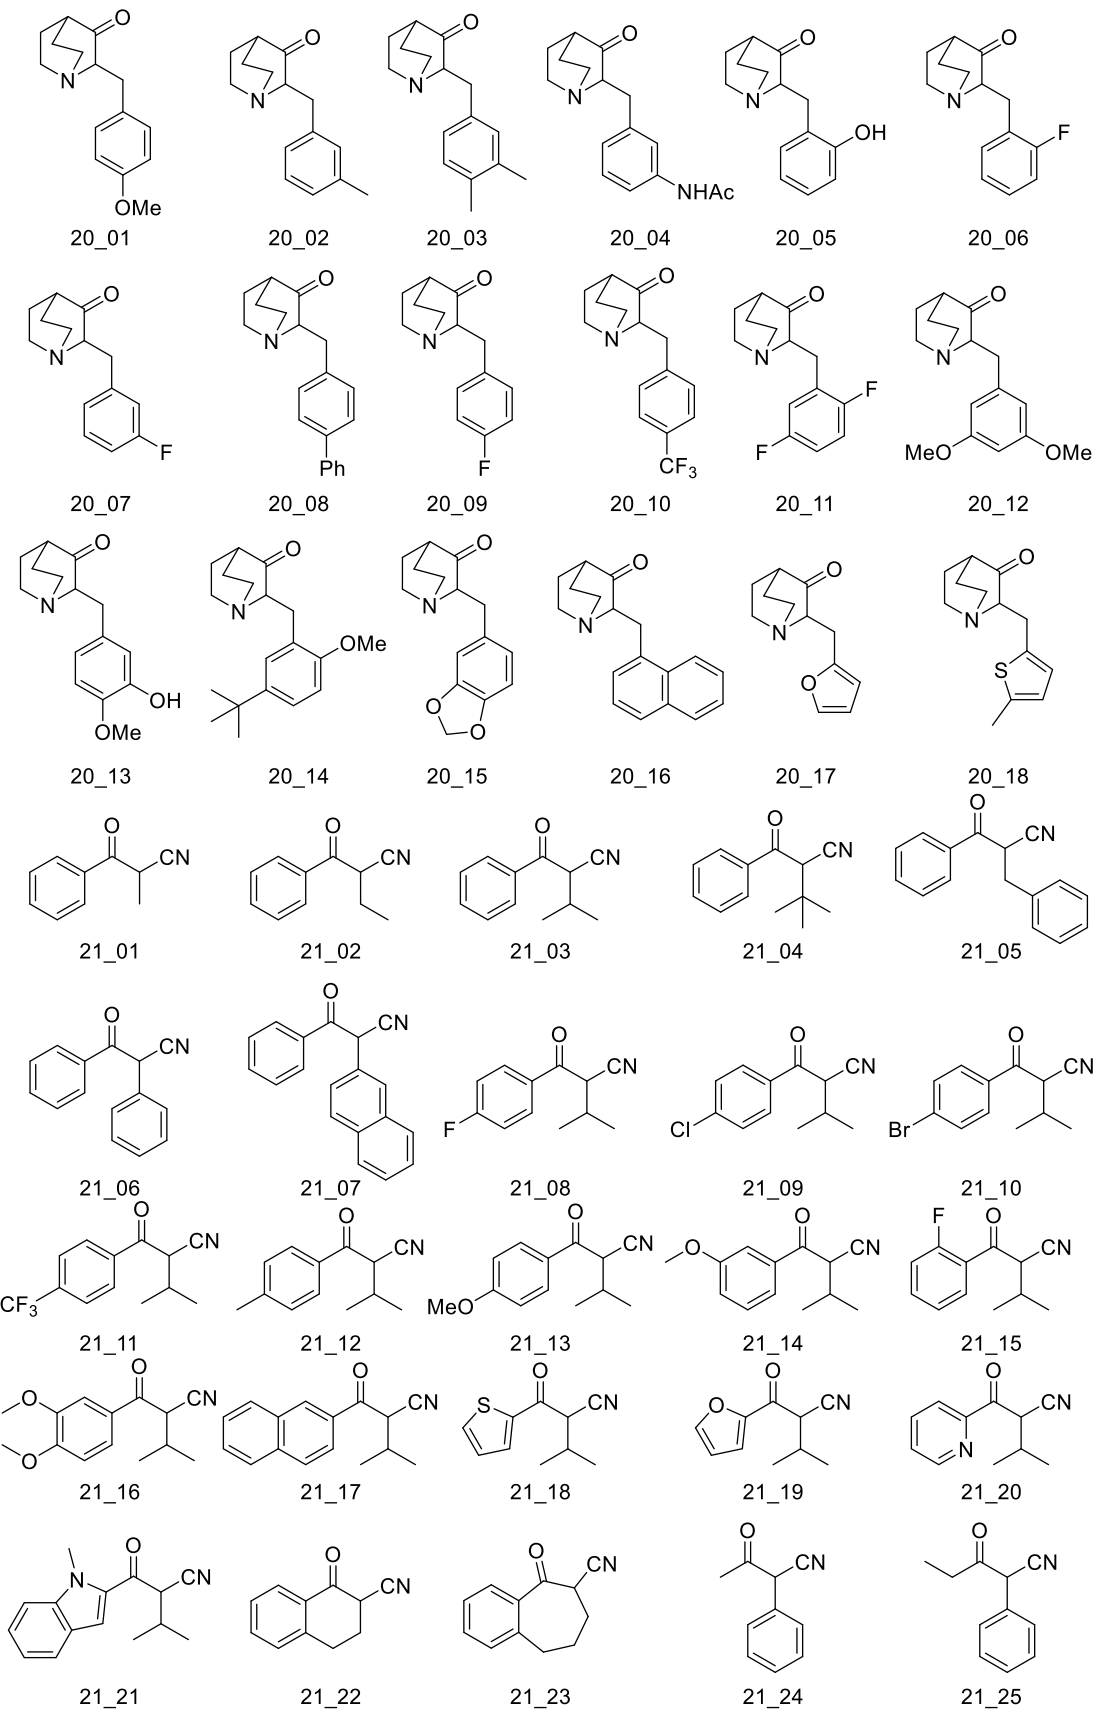

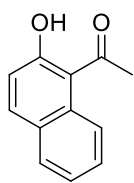

22\_01

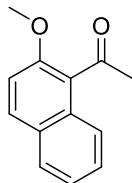

22\_02

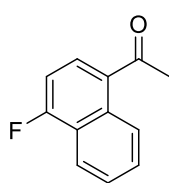

22\_03

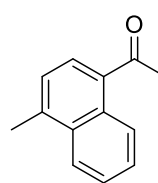

22\_04

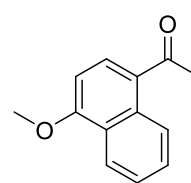

22\_05

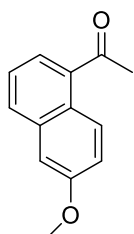

22\_06

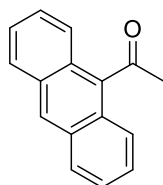

22\_07

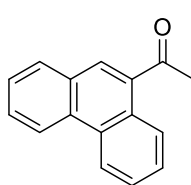

22\_08

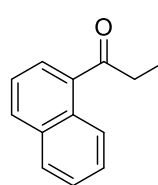

22\_09

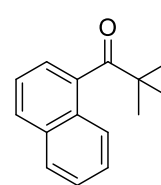

22\_10

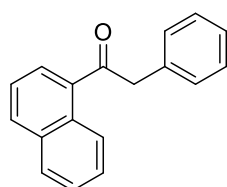

22\_11

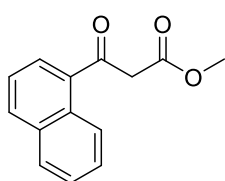

22\_12

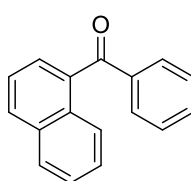

22\_13

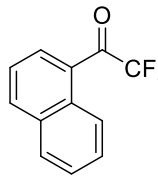

22\_14

## 5. Reactions

| Number        | Temperature(K) | Hydrogen Source | Solvent | Sub.  | Cat.  | ee(%) |
|---------------|----------------|-----------------|---------|-------|-------|-------|
| 01_01Cat01301 | 301            | FA/TEA=5:2      | /       | 01_01 | Cat01 | 98    |
| 01_02Cat01301 | 301            | FA/TEA=5:2      | /       | 01_02 | Cat01 | 97    |
| 01_03Cat01301 | 301            | FA/TEA=5:2      | /       | 01_03 | Cat01 | 95    |
| 01_04Cat01301 | 301            | FA/TEA=5:2      | /       | 01_04 | Cat01 | 98    |
| 01_05Cat01301 | 301            | FA/TEA=5:2      | /       | 01_05 | Cat01 | 97    |
| 01_06Cat01301 | 301            | FA/TEA=5:2      | /       | 01_06 | Cat01 | 97    |
| 01_07Cat01301 | 301            | FA/TEA=5:2      | /       | 01_07 | Cat01 | 95    |
| 01_08Cat01301 | 301            | FA/TEA=5:2      | /       | 01_08 | Cat01 | 96    |
| 01_09Cat01301 | 301            | FA/TEA=5:2      | /       | 01_09 | Cat01 | 99    |
| 01_10Cat01301 | 301            | FA/TEA=5:2      | /       | 01_10 | Cat01 | 99    |
| 01_11Cat01301 | 301            | FA/TEA=5:2      | /       | 01_11 | Cat01 | 98    |
| 01_12Cat01301 | 301            | FA/TEA=5:2      | /       | 01_12 | Cat01 | 97    |
| 01_01Cat01333 | 333            | FA/TEA=5:2      | /       | 01_01 | Cat01 | 96    |
| 01_10Cat01333 | 333            | FA/TEA=5:2      | /       | 01_10 | Cat01 | 98    |
| 02_01Cat02313 | 313            | FA/TEA=5:2      | /       | 02_01 | Cat02 | 95    |
| 02_02Cat02301 | 301            | FA/TEA=5:2      | /       | 02_02 | Cat02 | 88    |
| 02_03Cat02313 | 313            | FA/TEA=5:2      | /       | 02_03 | Cat02 | 92    |
| 02_04Cat02301 | 301            | FA/TEA=5:2      | /       | 02_04 | Cat02 | 93    |
| 02_05Cat02301 | 301            | FA/TEA=5:2      | /       | 02_05 | Cat02 | 89    |
| 02_02Cat03301 | 301            | FA/TEA=5:2      | /       | 02_02 | Cat03 | 86    |
| 02_03Cat03301 | 301            | FA/TEA=5:2      | /       | 02_03 | Cat03 | 86    |
| 02_04Cat03301 | 301            | FA/TEA=5:2      | /       | 02_04 | Cat03 | 83    |
| 02_05Cat03301 | 301            | FA/TEA=5:2      | /       | 02_05 | Cat03 | 85    |
| 02_06Cat03301 | 301            | FA/TEA=5:2      | /       | 02_06 | Cat03 | 88    |
| 02_07Cat03301 | 301            | FA/TEA=5:2      | /       | 02_07 | Cat03 | 83    |
| 03_01Cat04303 | 303            | FA/TEA=5:2      | DCM     | 03_01 | Cat04 | 99    |
| 03_02Cat04303 | 303            | FA/TEA=5:2      | DCM     | 03_02 | Cat04 | 99    |
| 03_03Cat04303 | 303            | FA/TEA=5:2      | DCM     | 03_03 | Cat04 | 98    |
| 03_04Cat04303 | 303            | FA/TEA=5:2      | DCM     | 03_04 | Cat04 | 99    |
| 03_05Cat04303 | 303            | FA/TEA=5:2      | DCM     | 03_05 | Cat04 | 99    |
| 03_06Cat04303 | 303            | FA/TEA=5:2      | DCM     | 03_06 | Cat04 | 99    |
| 03_07Cat04303 | 303            | FA/TEA=5:2      | DCM     | 03_07 | Cat04 | 99    |
| 03_08Cat04303 | 303            | FA/TEA=5:2      | DCM     | 03_08 | Cat04 | 99    |
| 03_09Cat04303 | 303            | FA/TEA=5:2      | DCM     | 03_09 | Cat04 | 98.5  |
| 03_10Cat04303 | 303            | FA/TEA=5:2      | DCM     | 03_10 | Cat04 | 98    |
| 03_11Cat04303 | 303            | FA/TEA=5:2      | DCM     | 03_11 | Cat04 | 70    |
| 03_12Cat04303 | 303            | FA/TEA=5:2      | DCM     | 03_12 | Cat04 | 71    |

|               |     |            |       |       |       |      |
|---------------|-----|------------|-------|-------|-------|------|
| 03_13Cat04303 | 303 | FA/TEA=5:2 | DCM   | 03_13 | Cat04 | 98   |
| 03_14Cat04303 | 303 | FA/TEA=5:2 | DCM   | 03_14 | Cat04 | 98   |
| 03_15Cat04303 | 303 | FA/TEA=5:2 | DCM   | 03_15 | Cat04 | 98.5 |
| 03_16Cat04303 | 303 | FA/TEA=5:2 | DCM   | 03_16 | Cat04 | 98   |
| 04_01Cat05301 | 301 | FA/TEA=5:2 | /     | 04_01 | Cat05 | 96   |
| 04_01Cat05313 | 313 | FA/TEA=5:2 | /     | 04_01 | Cat05 | 96   |
| 04_01Cat05353 | 353 | FA/TEA=5:2 | /     | 04_01 | Cat05 | 94   |
| 04_02Cat05287 | 287 | FA/TEA=5:2 | /     | 04_02 | Cat05 | 72   |
| 04_02Cat05301 | 301 | FA/TEA=5:2 | /     | 04_02 | Cat05 | 69   |
| 04_03Cat05313 | 313 | FA/TEA=5:2 | /     | 04_03 | Cat05 | 94   |
| 04_04Cat05301 | 301 | FA/TEA=5:2 | /     | 04_04 | Cat05 | 95   |
| 04_04Cat05313 | 313 | FA/TEA=5:2 | /     | 04_04 | Cat05 | 95   |
| 04_05Cat05313 | 313 | FA/TEA=5:2 | /     | 04_05 | Cat05 | 95   |
| 04_06Cat05313 | 313 | FA/TEA=5:2 | /     | 04_06 | Cat05 | 77   |
| 04_07Cat05313 | 313 | FA/TEA=5:2 | /     | 04_07 | Cat05 | 78   |
| 04_08Cat05313 | 313 | FA/TEA=5:2 | /     | 04_08 | Cat05 | 78   |
| 05_01Cat06333 | 333 | FA/TEA=5:2 | EtOAc | 05_01 | Cat06 | 99.9 |
| 05_02Cat06333 | 333 | FA/TEA=5:2 | EtOAc | 05_02 | Cat06 | 99.9 |
| 05_03Cat06333 | 333 | FA/TEA=5:2 | EtOAc | 05_03 | Cat06 | 99.9 |
| 05_04Cat06333 | 333 | FA/TEA=5:2 | EtOAc | 05_04 | Cat06 | 99.8 |
| 05_05Cat06333 | 333 | FA/TEA=5:2 | EtOAc | 05_05 | Cat06 | 99.7 |
| 05_06Cat06333 | 333 | FA/TEA=5:2 | EtOAc | 05_06 | Cat06 | 99.5 |
| 05_07Cat06333 | 333 | FA/TEA=5:2 | EtOAc | 05_07 | Cat06 | 99.8 |
| 05_12Cat06303 | 303 | FA/TEA=5:2 | EtOAc | 05_12 | Cat06 | 99.6 |
| 05_14Cat06333 | 333 | FA/TEA=5:2 | EtOAc | 05_14 | Cat06 | 99.9 |
| 05_15Cat06333 | 333 | FA/TEA=5:2 | EtOAc | 05_15 | Cat06 | 99.9 |
| 05_08Cat06333 | 333 | FA/TEA=5:2 | EtOAc | 05_08 | Cat06 | 97   |
| 05_10Cat06313 | 313 | FA/TEA=5:2 | EtOAc | 05_10 | Cat06 | 99.5 |
| 05_11Cat06313 | 313 | FA/TEA=5:2 | EtOAc | 05_11 | Cat06 | 99.9 |
| 05_13Cat06333 | 333 | FA/TEA=5:2 | EtOAc | 05_13 | Cat06 | 98.9 |
| 05_16Cat06333 | 333 | FA/TEA=5:2 | EtOAc | 05_16 | Cat06 | 99.9 |
| 05_01Cat06333 | 333 | FA/TEA=5:2 | EtOAc | 05_01 | Cat06 | 99.9 |
| 06_01Cat06333 | 333 | FA/TEA=5:2 | /     | 06_01 | Cat06 | 98   |
| 06_02Cat06313 | 313 | FA/TEA=5:2 | /     | 06_02 | Cat06 | 98   |
| 06_03Cat06333 | 333 | FA/TEA=5:2 | /     | 06_03 | Cat06 | 99   |
| 06_04Cat06333 | 333 | FA/TEA=5:2 | /     | 06_04 | Cat06 | 99   |
| 06_05Cat06333 | 333 | FA/TEA=5:2 | /     | 06_05 | Cat06 | 97   |
| 06_06Cat06333 | 333 | FA/TEA=5:2 | /     | 06_06 | Cat06 | 98   |
| 06_07Cat06303 | 303 | FA/TEA=5:2 | /     | 06_07 | Cat06 | 99   |
| 06_08Cat06313 | 313 | FA/TEA=5:2 | /     | 06_08 | Cat06 | 99   |
| 06_09Cat06283 | 283 | FA/TEA=5:2 | /     | 06_09 | Cat06 | 91   |
| 06_10Cat06303 | 303 | FA/TEA=5:2 | /     | 06_10 | Cat06 | 90   |
| 06_11Cat06333 | 333 | FA/TEA=5:2 | /     | 06_11 | Cat06 | 99   |

|               |     |            |     |       |       |      |
|---------------|-----|------------|-----|-------|-------|------|
| 06_12Cat06303 | 303 | FA/TEA=5:2 | /   | 06_12 | Cat06 | 97   |
| 06_13Cat06313 | 313 | FA/TEA=5:2 | /   | 06_13 | Cat06 | 97   |
| 06_15Cat06303 | 303 | FA/TEA=5:2 | /   | 06_15 | Cat06 | 76   |
| 06_16Cat06303 | 303 | FA/TEA=5:2 | /   | 06_16 | Cat06 | 77   |
| 06_17Cat06303 | 303 | FA/TEA=5:2 | /   | 06_17 | Cat06 | 76   |
| 06_18Cat06303 | 303 | FA/TEA=5:2 | /   | 06_18 | Cat06 | 93   |
| 06_19Cat06283 | 283 | FA/TEA=5:2 | /   | 06_19 | Cat06 | 95   |
| 06_20Cat06303 | 303 | FA/TEA=5:2 | /   | 06_20 | Cat06 | 99   |
| 06_24Cat06303 | 303 | FA/TEA=5:2 | /   | 06_24 | Cat06 | 79   |
| 06_25Cat06303 | 303 | FA/TEA=5:2 | /   | 06_25 | Cat06 | 99   |
| 07_01Cat05300 | 300 | FA/TEA=5:2 | DCM | 07_01 | Cat05 | 99.9 |
| 07_02Cat05300 | 300 | FA/TEA=5:2 | DCM | 07_02 | Cat05 | 99.2 |
| 07_03Cat05300 | 300 | FA/TEA=5:2 | DCM | 07_03 | Cat05 | 99.9 |
| 07_04Cat05300 | 300 | FA/TEA=5:2 | DCM | 07_04 | Cat05 | 94.3 |
| 07_05Cat05300 | 300 | FA/TEA=5:2 | DCM | 07_05 | Cat05 | 97.7 |
| 07_06Cat05300 | 300 | FA/TEA=5:2 | DCM | 07_06 | Cat05 | 87.6 |
| 07_07Cat05300 | 300 | FA/TEA=5:2 | DCM | 07_07 | Cat05 | 88.3 |
| 07_08Cat05300 | 300 | FA/TEA=5:2 | DCM | 07_08 | Cat05 | 99.5 |
| 07_09Cat05300 | 300 | FA/TEA=5:2 | DCM | 07_09 | Cat05 | 91.8 |
| 07_10Cat05300 | 300 | FA/TEA=5:2 | DCM | 07_10 | Cat05 | 95.4 |
| 07_11Cat05300 | 300 | FA/TEA=5:2 | DCM | 07_11 | Cat05 | 95.2 |
| 07_12Cat05300 | 300 | FA/TEA=5:2 | DCM | 07_12 | Cat05 | 89.6 |
| 07_13Cat05300 | 300 | FA/TEA=5:2 | DCM | 07_13 | Cat05 | 88.1 |
| 07_14Cat05300 | 300 | FA/TEA=5:2 | DCM | 07_14 | Cat05 | 95.5 |
| 07_15Cat05300 | 300 | FA/TEA=5:2 | DCM | 07_15 | Cat05 | 91.5 |
| 08_01Cat08303 | 303 | FA/TEA=5:2 | DCM | 08_01 | Cat08 | 99   |
| 08_02Cat08303 | 303 | FA/TEA=5:2 | DCM | 08_02 | Cat08 | 99   |
| 08_03Cat08303 | 303 | FA/TEA=5:2 | DCM | 08_03 | Cat08 | 99   |
| 08_04Cat08303 | 303 | FA/TEA=5:2 | DCM | 08_04 | Cat08 | 99   |
| 08_05Cat08303 | 303 | FA/TEA=5:2 | DCM | 08_05 | Cat08 | 97   |
| 08_06Cat08303 | 303 | FA/TEA=5:2 | DCM | 08_06 | Cat08 | 99   |
| 08_07Cat08303 | 303 | FA/TEA=5:2 | DCM | 08_07 | Cat08 | 99   |
| 08_08Cat08303 | 303 | FA/TEA=5:2 | DCM | 08_08 | Cat08 | 99   |
| 08_09Cat08303 | 303 | FA/TEA=5:2 | DCM | 08_09 | Cat08 | 99   |
| 08_10Cat08303 | 303 | FA/TEA=5:2 | DCM | 08_10 | Cat08 | 99   |
| 08_11Cat08303 | 303 | FA/TEA=5:2 | DCM | 08_11 | Cat08 | 99   |
| 08_12Cat08303 | 303 | FA/TEA=5:2 | DCM | 08_12 | Cat08 | 99   |
| 09_01Cat09298 | 298 | FA/TEA=5:2 | DCM | 09_01 | Cat09 | 98   |
| 09_02Cat09298 | 298 | FA/TEA=5:2 | DCM | 09_02 | Cat09 | 94   |
| 09_03Cat09298 | 298 | FA/TEA=5:2 | DCM | 09_03 | Cat09 | 95   |
| 09_04Cat09298 | 298 | FA/TEA=5:2 | DCM | 09_04 | Cat09 | 96   |
| 09_05Cat09298 | 298 | FA/TEA=5:2 | DCM | 09_05 | Cat09 | 94   |
| 09_06Cat09298 | 298 | FA/TEA=5:2 | DCM | 09_06 | Cat09 | 94   |

|               |     |            |      |       |       |       |
|---------------|-----|------------|------|-------|-------|-------|
| 09_07Cat09298 | 298 | FA/TEA=5:2 | DCM  | 09_07 | Cat09 | 92    |
| 09_08Cat09298 | 298 | FA/TEA=5:2 | DCM  | 09_08 | Cat09 | 95    |
| 09_09Cat09298 | 298 | FA/TEA=5:2 | DCM  | 09_09 | Cat09 | 96    |
| 09_10Cat09298 | 298 | FA/TEA=5:2 | DCM  | 09_10 | Cat09 | 90    |
| 09_11Cat09298 | 298 | FA/TEA=5:2 | DCM  | 09_11 | Cat09 | 95    |
| 09_12Cat09298 | 298 | FA/TEA=5:2 | DCM  | 09_12 | Cat09 | 97    |
| 09_13Cat09298 | 298 | FA/TEA=5:2 | DCM  | 09_13 | Cat09 | 96    |
| 10_01Cat05300 | 300 | FA/TEA=5:2 | DCM  | 10_01 | Cat05 | 43.6  |
| 10_02Cat05300 | 300 | FA/TEA=5:2 | DCM  | 10_02 | Cat05 | 52.04 |
| 10_03Cat05300 | 300 | FA/TEA=5:2 | DCM  | 10_03 | Cat05 | 45.4  |
| 10_04Cat05300 | 300 | FA/TEA=5:2 | DCM  | 10_04 | Cat05 | 24.6  |
| 10_05Cat05300 | 300 | FA/TEA=5:2 | DCM  | 10_05 | Cat05 | 34.9  |
| 10_06Cat05300 | 300 | FA/TEA=5:2 | DCM  | 10_06 | Cat05 | 95.3  |
| 10_07Cat05300 | 300 | FA/TEA=5:2 | DCM  | 10_07 | Cat05 | 29.5  |
| 10_08Cat05300 | 300 | FA/TEA=5:2 | DCM  | 10_08 | Cat05 | 79.1  |
| 10_10Cat05300 | 300 | FA/TEA=5:2 | DCM  | 10_10 | Cat05 | 50    |
| 10_11Cat05300 | 300 | FA/TEA=5:2 | DCM  | 10_11 | Cat05 | 77.9  |
| 10_12Cat05300 | 300 | FA/TEA=5:2 | DCM  | 10_12 | Cat05 | 94.42 |
| 11_01Cat05298 | 298 | FA/TEA=5:2 | /    | 11_01 | Cat05 | 30    |
| 11_02Cat05298 | 298 | FA/TEA=5:2 | /    | 11_02 | Cat05 | 41    |
| 11_03Cat05298 | 298 | FA/TEA=5:2 | /    | 11_03 | Cat05 | 39    |
| 11_04Cat05298 | 298 | FA/TEA=5:2 | /    | 11_04 | Cat05 | 27    |
| 11_05Cat05298 | 298 | FA/TEA=5:2 | /    | 11_05 | Cat05 | 46    |
| 11_06Cat05298 | 298 | FA/TEA=5:2 | /    | 11_06 | Cat05 | 37    |
| 11_07Cat05298 | 298 | FA/TEA=5:2 | /    | 11_07 | Cat05 | 31    |
| 11_08Cat05298 | 298 | FA/TEA=5:2 | /    | 11_08 | Cat05 | 7     |
| 11_09Cat05298 | 298 | FA/TEA=5:2 | /    | 11_09 | Cat05 | 6     |
| 11_10Cat05298 | 298 | FA/TEA=5:2 | /    | 11_10 | Cat05 | 12    |
| 11_11Cat05298 | 298 | FA/TEA=5:2 | /    | 11_11 | Cat05 | 0     |
| 11_12Cat05298 | 298 | FA/TEA=5:2 | /    | 11_12 | Cat05 | 16    |
| 11_13Cat05298 | 298 | FA/TEA=5:2 | /    | 11_13 | Cat05 | 42    |
| 11_14Cat05298 | 298 | FA/TEA=5:2 | /    | 11_14 | Cat05 | 33    |
| 11_15Cat05298 | 298 | FA/TEA=5:2 | /    | 11_15 | Cat05 | 68    |
| 11_16Cat05298 | 298 | FA/TEA=5:2 | /    | 11_16 | Cat05 | 46    |
| 11_17Cat05298 | 298 | FA/TEA=5:2 | /    | 11_17 | Cat05 | 65    |
| 11_18Cat05298 | 298 | FA/TEA=5:2 | /    | 11_18 | Cat05 | 59    |
| 11_19Cat05298 | 298 | FA/TEA=5:2 | /    | 11_19 | Cat05 | 21    |
| 11_21Cat05298 | 298 | FA/TEA=5:2 | /    | 11_21 | Cat05 | 0     |
| 11_22Cat05298 | 298 | FA/TEA=5:2 | /    | 11_22 | Cat05 | 27    |
| 11_23Cat05298 | 298 | FA/TEA=5:2 | /    | 11_23 | Cat05 | 28    |
| 11_24Cat05298 | 298 | FA/TEA=5:2 | /    | 11_24 | Cat05 | 28    |
| 11_25Cat05298 | 298 | FA/TEA=5:2 | /    | 11_25 | Cat05 | 50    |
| 12_01Cat08323 | 323 | FA/TEA=5:2 | MeCN | 12_01 | Cat08 | 99    |

|               |     |            |      |       |       |    |
|---------------|-----|------------|------|-------|-------|----|
| 12_02Cat08323 | 323 | FA/TEA=5:2 | MeCN | 12_02 | Cat08 | 99 |
| 12_03Cat08323 | 323 | FA/TEA=5:2 | MeCN | 12_03 | Cat08 | 97 |
| 12_04Cat08323 | 323 | FA/TEA=5:2 | MeCN | 12_04 | Cat08 | 99 |
| 12_05Cat08323 | 323 | FA/TEA=5:2 | MeCN | 12_05 | Cat08 | 99 |
| 12_06Cat08323 | 323 | FA/TEA=5:2 | MeCN | 12_06 | Cat08 | 99 |
| 12_07Cat08323 | 323 | FA/TEA=5:2 | MeCN | 12_07 | Cat08 | 99 |
| 12_08Cat08323 | 323 | FA/TEA=5:2 | MeCN | 12_08 | Cat08 | 99 |
| 12_09Cat08323 | 323 | FA/TEA=5:2 | MeCN | 12_09 | Cat08 | 99 |
| 12_10Cat08323 | 323 | FA/TEA=5:2 | MeCN | 12_10 | Cat08 | 98 |
| 12_11Cat08323 | 323 | FA/TEA=5:2 | MeCN | 12_11 | Cat08 | 99 |
| 12_12Cat08323 | 323 | FA/TEA=5:2 | MeCN | 12_12 | Cat08 | 99 |
| 12_13Cat08323 | 323 | FA/TEA=5:2 | MeCN | 12_13 | Cat08 | 99 |
| 13_01Cat05298 | 298 | FA/TEA=5:2 | DCM  | 13_01 | Cat05 | 77 |
| 13_02Cat05298 | 298 | FA/TEA=5:2 | DCM  | 13_02 | Cat05 | 94 |
| 13_04Cat05298 | 298 | FA/TEA=5:2 | DCM  | 13_04 | Cat05 | 79 |
| 13_06Cat05298 | 298 | FA/TEA=5:2 | DCM  | 13_06 | Cat05 | 77 |
| 13_07Cat05298 | 298 | FA/TEA=5:2 | DCM  | 13_07 | Cat05 | 88 |
| 13_08Cat05298 | 298 | FA/TEA=5:2 | DCM  | 13_08 | Cat05 | 94 |
| 13_10Cat05298 | 298 | FA/TEA=5:2 | DCM  | 13_10 | Cat05 | 91 |
| 13_11Cat05298 | 298 | FA/TEA=5:2 | DCM  | 13_11 | Cat05 | 89 |
| 13_12Cat05298 | 298 | FA/TEA=5:2 | DCM  | 13_12 | Cat05 | 95 |
| 13_14Cat05298 | 298 | FA/TEA=5:2 | DCM  | 13_14 | Cat05 | 89 |
| 13_15Cat05298 | 298 | FA/TEA=5:2 | DCM  | 13_15 | Cat05 | 92 |
| 13_16Cat05298 | 298 | FA/TEA=5:2 | DCM  | 13_16 | Cat05 | 92 |
| 13_17Cat05298 | 298 | FA/TEA=5:2 | DCM  | 13_17 | Cat05 | 97 |
| 13_18Cat05298 | 298 | FA/TEA=5:2 | DCM  | 13_18 | Cat05 | 97 |
| 13_19Cat05298 | 298 | FA/TEA=5:2 | DCM  | 13_19 | Cat05 | 98 |
| 13_20Cat05298 | 298 | FA/TEA=5:2 | DCM  | 13_20 | Cat05 | 99 |
| 13_21Cat05298 | 298 | FA/TEA=5:2 | DCM  | 13_21 | Cat05 | 97 |
| 13_22Cat05298 | 298 | FA/TEA=5:2 | DCM  | 13_22 | Cat05 | 95 |
| 13_23Cat05298 | 298 | FA/TEA=5:2 | DCM  | 13_23 | Cat05 | 98 |
| 13_24Cat05298 | 298 | FA/TEA=5:2 | DCM  | 13_24 | Cat05 | 94 |
| 13_25Cat05298 | 298 | FA/TEA=5:2 | DCM  | 13_25 | Cat05 | 98 |
| 13_26Cat05298 | 298 | FA/TEA=5:2 | DCM  | 13_26 | Cat05 | 98 |
| 13_28Cat05298 | 298 | FA/TEA=5:2 | DCM  | 13_28 | Cat05 | 97 |
| 13_31Cat05298 | 298 | FA/TEA=5:2 | DCM  | 13_31 | Cat05 | 90 |
| 13_32Cat05298 | 298 | FA/TEA=5:2 | DCM  | 13_32 | Cat05 | 94 |
| 13_33Cat05298 | 298 | FA/TEA=5:2 | DCM  | 13_33 | Cat05 | 92 |
| 13_34Cat05298 | 298 | FA/TEA=5:2 | DCM  | 13_34 | Cat05 | 93 |
| 13_35Cat05298 | 298 | FA/TEA=5:2 | DCM  | 13_35 | Cat05 | 90 |
| 13_36Cat05298 | 298 | FA/TEA=5:2 | DCM  | 13_36 | Cat05 | 80 |
| 14_01Cat05298 | 298 | FA/TEA=5:2 | DCM  | 14_01 | Cat05 | 99 |
| 14_02Cat05298 | 298 | FA/TEA=5:2 | DCM  | 14_02 | Cat05 | 93 |

|                  |     |            |     |          |       |    |
|------------------|-----|------------|-----|----------|-------|----|
| 14_03Cat05298    | 298 | FA/TEA=5:2 | DCM | 14_03    | Cat05 | 99 |
| 14_04Cat05298    | 298 | FA/TEA=5:2 | DCM | 14_04    | Cat05 | 99 |
| 14_05Cat05298    | 298 | FA/TEA=5:2 | DCM | 14_05    | Cat05 | 84 |
| 14_06Cat05298    | 298 | FA/TEA=5:2 | DCM | 14_06    | Cat05 | 70 |
| 14_07Cat05298    | 298 | FA/TEA=5:2 | DCM | 14_07    | Cat05 | 98 |
| 14_08Cat05298    | 298 | FA/TEA=5:2 | DCM | 14_08    | Cat05 | 90 |
| 14_09Cat05298    | 298 | FA/TEA=5:2 | DCM | 14_09    | Cat05 | 88 |
| 14_10Cat05298    | 298 | FA/TEA=5:2 | DCM | 14_10    | Cat05 | 85 |
| 14_11Cat05298    | 298 | FA/TEA=5:2 | DCM | 14_11    | Cat05 | 97 |
| 14_12Cat05298    | 298 | FA/TEA=5:2 | DCM | 14_12    | Cat05 | 81 |
| 14_13Cat05298    | 298 | FA/TEA=5:2 | DCM | 14_13    | Cat05 | 99 |
| 14_14Cat05298    | 298 | FA/TEA=5:2 | DCM | 14_14    | Cat05 | 99 |
| 14_15Cat05298    | 298 | FA/TEA=5:2 | DCM | 14_15    | Cat05 | 91 |
| 14_16Cat05298    | 298 | FA/TEA=5:2 | DCM | 14_16    | Cat05 | 41 |
| 14_17Cat05298    | 298 | FA/TEA=5:2 | DCM | 14_17    | Cat05 | 95 |
| 14_18Cat05298    | 298 | FA/TEA=5:2 | DCM | 14_18    | Cat05 | 95 |
| 14_19Cat05298    | 298 | FA/TEA=5:2 | DCM | 14_19    | Cat05 | 97 |
| 14_20Cat05298    | 298 | FA/TEA=5:2 | DCM | 14_20    | Cat05 | 99 |
| 14_21Cat05298    | 298 | FA/TEA=5:2 | DCM | 14_21    | Cat05 | 96 |
| 14_22Cat05298    | 298 | FA/TEA=5:2 | DCM | 14_22    | Cat05 | 97 |
| 15_01Cat08273    | 273 | FA/TEA=5:2 | DCM | 15_01    | Cat08 | 99 |
| 15_02Cat08273    | 273 | FA/TEA=5:2 | DCM | 15_02    | Cat08 | 99 |
| 15_03Cat08273    | 273 | FA/TEA=5:2 | DCM | 15_03    | Cat08 | 99 |
| 15_04Cat08273    | 273 | FA/TEA=5:2 | DCM | 15_04    | Cat08 | 99 |
| 15_05Cat08273    | 273 | FA/TEA=5:2 | DCM | 15_05    | Cat08 | 99 |
| 15_06Cat08273    | 273 | FA/TEA=5:2 | DCM | 15_06    | Cat08 | 99 |
| 15_07Cat08273    | 273 | FA/TEA=5:2 | DCM | 15_07    | Cat08 | 99 |
| 15_08Cat08273    | 273 | FA/TEA=5:2 | DCM | 15_08    | Cat08 | 99 |
| 15_09Cat08273    | 273 | FA/TEA=5:2 | DCM | 15_09    | Cat08 | 99 |
| 15_10Cat08273    | 273 | FA/TEA=5:2 | DCM | 15_10    | Cat08 | 99 |
| 15_11Cat08273    | 273 | FA/TEA=5:2 | DCM | 15_11    | Cat08 | 99 |
| 15_12Cat08273    | 273 | FA/TEA=5:2 | DCM | 15_12    | Cat08 | 99 |
| 15_13Cat08273    | 273 | FA/TEA=5:2 | DCM | 15_13    | Cat08 | 99 |
| 15_14Cat08273    | 273 | FA/TEA=5:2 | DCM | 15_14    | Cat08 | 99 |
| 15_16Cat08273    | 273 | FA/TEA=5:2 | DCM | 15_16    | Cat08 | 99 |
| 15_17Cat08273    | 273 | FA/TEA=5:2 | DCM | 15_17    | Cat08 | 99 |
| 15_18Cat08273    | 273 | FA/TEA=5:2 | DCM | 15_18    | Cat08 | 99 |
| 15_19Cat08273    | 273 | FA/TEA=5:2 | DCM | 15_19    | Cat08 | 99 |
| 15_01_02Cat14273 | 273 | FA/TEA=5:2 | DCM | 15_01_02 | Cat14 | 28 |
| 15_01_03Cat06273 | 273 | FA/TEA=5:2 | DCM | 15_01_03 | Cat06 | 25 |
| 15_01_04Cat05273 | 273 | FA/TEA=5:2 | DCM | 15_01_04 | Cat05 | 36 |
| 16_01Cat10313    | 313 | FA/TEA=5:2 | /   | 16_01    | Cat10 | 81 |
| 16_02Cat10313    | 313 | FA/TEA=5:2 | /   | 16_02    | Cat10 | 77 |



|                  |     |            |     |          |       |    |
|------------------|-----|------------|-----|----------|-------|----|
| 16_03Cat10313    | 313 | FA/TEA=5:2 | /   | 16_03    | Cat10 | 85 |
| 16_04Cat10313    | 313 | FA/TEA=5:2 | /   | 16_04    | Cat10 | 83 |
| 16_05Cat10313    | 313 | FA/TEA=5:2 | /   | 16_05    | Cat10 | 86 |
| 16_06Cat10313    | 313 | FA/TEA=5:2 | /   | 16_06    | Cat10 | 81 |
| 16_07Cat10313    | 313 | FA/TEA=5:2 | /   | 16_07    | Cat10 | 70 |
| 16_08Cat10313    | 313 | FA/TEA=5:2 | /   | 16_08    | Cat10 | 85 |
| 16_09Cat10313    | 313 | FA/TEA=5:2 | /   | 16_09    | Cat10 | 85 |
| 16_10Cat10313    | 313 | FA/TEA=5:2 | /   | 16_10    | Cat10 | 84 |
| 16_11Cat10313    | 313 | FA/TEA=5:2 | /   | 16_11    | Cat10 | 85 |
| 16_12Cat10313    | 313 | FA/TEA=5:2 | /   | 16_12    | Cat10 | 74 |
| 16_13Cat10313    | 313 | FA/TEA=5:2 | /   | 16_13    | Cat10 | 81 |
| 16_14Cat10313    | 313 | FA/TEA=5:2 | /   | 16_14    | Cat10 | 79 |
| 16_15Cat10313    | 313 | FA/TEA=5:2 | /   | 16_15    | Cat10 | 79 |
| 16_16Cat10313    | 313 | FA/TEA=5:2 | /   | 16_16    | Cat10 | 82 |
| 16_17Cat10313    | 313 | FA/TEA=5:2 | /   | 16_17    | Cat10 | 78 |
| 16_18Cat10313    | 313 | FA/TEA=5:2 | /   | 16_18    | Cat10 | 78 |
| 16_19Cat10313    | 313 | FA/TEA=5:2 | /   | 16_19    | Cat10 | 82 |
| 16_20Cat10313    | 313 | FA/TEA=5:2 | /   | 16_20    | Cat10 | 73 |
| 16_21Cat10313    | 313 | FA/TEA=5:2 | /   | 16_21    | Cat10 | 74 |
| 16_22Cat10313    | 313 | FA/TEA=5:2 | /   | 16_22    | Cat10 | 78 |
| 16_23Cat10313    | 313 | FA/TEA=5:2 | /   | 16_23    | Cat10 | 87 |
| 16_24Cat10313    | 313 | FA/TEA=5:2 | /   | 16_24    | Cat10 | 82 |
| 16_25Cat10313    | 313 | FA/TEA=5:2 | /   | 16_25    | Cat10 | 85 |
| 16_26Cat10313    | 313 | FA/TEA=5:2 | /   | 16_26    | Cat10 | 83 |
| 16_01_02Cat06313 | 313 | FA/TEA=5:2 | /   | 16_01_02 | Cat06 | 60 |
| 16_01_03Cat04313 | 313 | FA/TEA=5:2 | /   | 16_01_03 | Cat04 | 61 |
| 16_01_04Cat04313 | 313 | FA/TEA=5:2 | /   | 16_01_04 | Cat04 | 79 |
| 16_01_05Cat04313 | 313 | FA/TEA=5:2 | /   | 16_01_05 | Cat04 | 77 |
| 16_01_06Cat04313 | 313 | FA/TEA=5:2 | /   | 16_01_06 | Cat04 | 79 |
| 16_01_07Cat04313 | 313 | FA/TEA=5:2 | /   | 16_01_07 | Cat04 | 77 |
| 16_01_08Cat04313 | 313 | FA/TEA=5:2 | /   | 16_01_08 | Cat04 | 73 |
| 17_01Cat08298    | 298 | FA/TEA=5:2 | DCM | 17_01    | Cat08 | 77 |
| 17_02Cat08298    | 298 | FA/TEA=5:2 | DCM | 17_02    | Cat08 | 76 |
| 17_04Cat08298    | 298 | FA/TEA=5:2 | DCM | 17_04    | Cat08 | 96 |
| 17_05Cat08298    | 298 | FA/TEA=5:2 | DCM | 17_05    | Cat08 | 97 |
| 17_06Cat08298    | 298 | FA/TEA=5:2 | DCM | 17_06    | Cat08 | 97 |
| 17_07Cat08298    | 298 | FA/TEA=5:2 | DCM | 17_07    | Cat08 | 99 |
| 17_08Cat08298    | 298 | FA/TEA=5:2 | DCM | 17_08    | Cat08 | 96 |
| 17_09Cat08298    | 298 | FA/TEA=5:2 | DCM | 17_09    | Cat08 | 97 |
| 17_10Cat08298    | 298 | FA/TEA=5:2 | DCM | 17_10    | Cat08 | 98 |
| 17_11Cat08298    | 298 | FA/TEA=5:2 | DCM | 17_11    | Cat08 | 99 |
| 17_12Cat08298    | 298 | FA/TEA=5:2 | DCM | 17_12    | Cat08 | 99 |
| 17_13Cat08298    | 298 | FA/TEA=5:2 | DCM | 17_13    | Cat08 | 98 |

|               |     |            |         |       |       |    |
|---------------|-----|------------|---------|-------|-------|----|
| 17_14Cat08298 | 298 | FA/TEA=5:2 | DCM     | 17_14 | Cat08 | 96 |
| 17_15Cat08298 | 298 | FA/TEA=5:2 | DCM     | 17_15 | Cat08 | 98 |
| 17_16Cat08298 | 298 | FA/TEA=5:2 | DCM     | 17_16 | Cat08 | 95 |
| 17_17Cat08298 | 298 | FA/TEA=5:2 | DCM     | 17_17 | Cat08 | 98 |
| 17_18Cat08298 | 298 | FA/TEA=5:2 | DCM     | 17_18 | Cat08 | 96 |
| 17_19Cat08298 | 298 | FA/TEA=5:2 | DCM     | 17_19 | Cat08 | 97 |
| 17_20Cat08298 | 298 | FA/TEA=5:2 | DCM     | 17_20 | Cat08 | 94 |
| 17_21Cat08298 | 298 | FA/TEA=5:2 | DCM     | 17_21 | Cat08 | 94 |
| 17_22Cat08298 | 298 | FA/TEA=5:2 | DCM     | 17_22 | Cat08 | 88 |
| 17_23Cat08298 | 298 | FA/TEA=5:2 | DCM     | 17_23 | Cat08 | 99 |
| 17_24Cat08298 | 298 | FA/TEA=5:2 | DCM     | 17_24 | Cat08 | 98 |
| 18_01Cat11293 | 293 | FA/TEA=5:2 | DCM     | 18_01 | Cat11 | 90 |
| 18_02Cat11293 | 293 | FA/TEA=5:2 | DCM     | 18_02 | Cat11 | 83 |
| 18_03Cat11293 | 293 | FA/TEA=5:2 | DCM     | 18_03 | Cat11 | 89 |
| 18_04Cat11293 | 293 | FA/TEA=5:2 | DCM     | 18_04 | Cat11 | 68 |
| 18_05Cat11293 | 293 | FA/TEA=5:2 | DCM     | 18_05 | Cat11 | 67 |
| 18_07Cat11293 | 293 | FA/TEA=5:2 | DCM     | 18_07 | Cat11 | 81 |
| 19_01Cat09298 | 298 | FA/TEA=5:2 | DCM     | 19_01 | Cat09 | 88 |
| 19_02Cat09298 | 298 | FA/TEA=5:2 | DCM     | 19_02 | Cat09 | 91 |
| 19_03Cat09298 | 298 | FA/TEA=5:2 | DCM     | 19_03 | Cat09 | 93 |
| 19_04Cat09298 | 298 | FA/TEA=5:2 | DCM     | 19_04 | Cat09 | 90 |
| 19_05Cat09298 | 298 | FA/TEA=5:2 | DCM     | 19_05 | Cat09 | 92 |
| 19_06Cat09298 | 298 | FA/TEA=5:2 | DCM     | 19_06 | Cat09 | 92 |
| 19_07Cat09298 | 298 | FA/TEA=5:2 | DCM     | 19_07 | Cat09 | 90 |
| 19_08Cat09298 | 298 | FA/TEA=5:2 | DCM     | 19_08 | Cat09 | 89 |
| 19_09Cat09298 | 298 | FA/TEA=5:2 | DCM     | 19_09 | Cat09 | 91 |
| 19_10Cat09298 | 298 | FA/TEA=5:2 | DCM     | 19_10 | Cat09 | 91 |
| 19_11Cat09298 | 298 | FA/TEA=5:2 | DCM     | 19_11 | Cat09 | 90 |
| 19_12Cat09298 | 298 | FA/TEA=5:2 | DCM     | 19_12 | Cat09 | 92 |
| 19_13Cat09298 | 298 | FA/TEA=5:2 | DCM     | 19_13 | Cat09 | 97 |
| 19_14Cat09298 | 298 | FA/TEA=5:2 | DCM     | 19_14 | Cat09 | 93 |
| 19_15Cat09298 | 298 | FA/TEA=5:2 | DCM     | 19_15 | Cat09 | 81 |
| 19_16Cat09298 | 298 | FA/TEA=5:2 | DCM     | 19_16 | Cat09 | 80 |
| 20_01Cat12323 | 323 | HCOONH4    | IPA/DCM | 20_01 | Cat12 | 99 |
| 20_02Cat12323 | 323 | HCOONH4    | IPA/DCM | 20_02 | Cat12 | 99 |
| 20_03Cat12323 | 323 | HCOONH4    | IPA/DCM | 20_03 | Cat12 | 99 |
| 20_04Cat12323 | 323 | HCOONH4    | IPA/DCM | 20_04 | Cat12 | 99 |
| 20_05Cat12323 | 323 | HCOONH4    | IPA/DCM | 20_05 | Cat12 | 99 |
| 20_06Cat12323 | 323 | HCOONH4    | IPA/DCM | 20_06 | Cat12 | 97 |
| 20_07Cat12323 | 323 | HCOONH4    | IPA/DCM | 20_07 | Cat12 | 98 |
| 20_08Cat12323 | 323 | HCOONH4    | IPA/DCM | 20_08 | Cat12 | 99 |
| 20_09Cat12323 | 323 | HCOONH4    | IPA/DCM | 20_09 | Cat12 | 99 |
| 20_10Cat12323 | 323 | HCOONH4    | IPA/DCM | 20_10 | Cat12 | 98 |

|                  |     |            |         |          |       |      |
|------------------|-----|------------|---------|----------|-------|------|
| 20_11Cat12323    | 323 | HCOONH4    | IPA/DCM | 20_11    | Cat12 | 95   |
| 20_12Cat12323    | 323 | HCOONH4    | IPA/DCM | 20_12    | Cat12 | 99   |
| 20_13Cat12323    | 323 | HCOONH4    | IPA/DCM | 20_13    | Cat12 | 99   |
| 20_14Cat12323    | 323 | HCOONH4    | IPA/DCM | 20_14    | Cat12 | 99   |
| 20_15Cat12323    | 323 | HCOONH4    | IPA/DCM | 20_15    | Cat12 | 98   |
| 20_16Cat12323    | 323 | HCOONH4    | IPA/DCM | 20_16    | Cat12 | 99   |
| 20_17Cat12323    | 323 | HCOONH4    | IPA/DCM | 20_17    | Cat12 | 97   |
| 20_18Cat12323    | 323 | HCOONH4    | IPA/DCM | 20_18    | Cat12 | 99   |
| 21_01Cat08298    | 298 | FA/TEA=5:2 | toluene | 21_01    | Cat08 | 99   |
| 21_02Cat08298    | 298 | FA/TEA=5:2 | toluene | 21_02    | Cat08 | 99   |
| 21_03Cat08298    | 298 | FA/TEA=5:2 | toluene | 21_03    | Cat08 | 99   |
| 21_04Cat08298    | 298 | FA/TEA=5:2 | toluene | 21_04    | Cat08 | 99   |
| 21_05Cat08298    | 298 | FA/TEA=5:2 | toluene | 21_05    | Cat08 | 98   |
| 21_06Cat08298    | 298 | FA/TEA=5:2 | toluene | 21_06    | Cat08 | 99   |
| 21_07Cat08298    | 298 | FA/TEA=5:2 | toluene | 21_07    | Cat08 | 99   |
| 21_08Cat08298    | 298 | FA/TEA=5:2 | toluene | 21_08    | Cat08 | 99   |
| 21_09Cat08298    | 298 | FA/TEA=5:2 | toluene | 21_09    | Cat08 | 99   |
| 21_10Cat08298    | 298 | FA/TEA=5:2 | toluene | 21_10    | Cat08 | 99   |
| 21_11Cat08298    | 298 | FA/TEA=5:2 | toluene | 21_11    | Cat08 | 99   |
| 21_12Cat08298    | 298 | FA/TEA=5:2 | toluene | 21_12    | Cat08 | 99   |
| 21_13Cat08298    | 298 | FA/TEA=5:2 | toluene | 21_13    | Cat08 | 99   |
| 21_14Cat08298    | 298 | FA/TEA=5:2 | toluene | 21_14    | Cat08 | 99   |
| 21_15Cat08298    | 298 | FA/TEA=5:2 | toluene | 21_15    | Cat08 | 99   |
| 21_16Cat08298    | 298 | FA/TEA=5:2 | toluene | 21_16    | Cat08 | 99   |
| 21_17Cat08298    | 298 | FA/TEA=5:2 | toluene | 21_17    | Cat08 | 99   |
| 21_18Cat08298    | 298 | FA/TEA=5:2 | toluene | 21_18    | Cat08 | 99   |
| 21_19Cat08298    | 298 | FA/TEA=5:2 | toluene | 21_19    | Cat08 | 99   |
| 21_20Cat08298    | 298 | FA/TEA=5:2 | toluene | 21_20    | Cat08 | 99   |
| 21_21Cat08298    | 298 | FA/TEA=5:2 | toluene | 21_21    | Cat08 | 99   |
| 21_22Cat08298    | 298 | FA/TEA=5:2 | toluene | 21_22    | Cat08 | 99   |
| 21_23Cat08298    | 298 | FA/TEA=5:2 | toluene | 21_23    | Cat08 | 99   |
| 21_24Cat08298    | 298 | FA/TEA=5:2 | toluene | 21_24    | Cat08 | 99   |
| 21_01_02Cat08298 | 298 | FA/TEA=5:2 | toluene | 21_01_02 | Cat08 | 77   |
| 22_01Cat13313    | 313 | FA/TEA=5:2 | /       | 22_01    | Cat13 | 97.2 |
| 22_01Cat13333    | 333 | FA/TEA=5:2 | /       | 22_01    | Cat13 | 95   |
| 22_03Cat13313    | 313 | FA/TEA=5:2 | /       | 22_03    | Cat13 | 97.8 |
| 22_03Cat13333    | 333 | FA/TEA=5:2 | /       | 22_03    | Cat13 | 97.2 |
| 22_04Cat13333    | 333 | FA/TEA=5:2 | /       | 22_04    | Cat13 | 98.4 |
| 22_05Cat13333    | 333 | FA/TEA=5:2 | /       | 22_05    | Cat13 | 92.3 |
| 22_06Cat13333    | 333 | FA/TEA=5:2 | /       | 22_06    | Cat13 | 97.6 |
| 22_08Cat13313    | 313 | FA/TEA=5:2 | /       | 22_08    | Cat13 | 99.9 |
| 22_08Cat13333    | 333 | FA/TEA=5:2 | /       | 22_08    | Cat13 | 98.1 |
| 22_09Cat13333    | 333 | FA/TEA=5:2 | /       | 22_09    | Cat13 | 97.8 |

|               |     |            |   |       |       |      |
|---------------|-----|------------|---|-------|-------|------|
| 22_10Cat13333 | 333 | FA/TEA=5:2 | / | 22_10 | Cat13 | 97   |
| 22_11Cat13313 | 313 | FA/TEA=5:2 | / | 22_11 | Cat13 | 99   |
| 22_11Cat13333 | 333 | FA/TEA=5:2 | / | 22_11 | Cat13 | 98.5 |
| 22_12Cat13313 | 313 | FA/TEA=5:2 | / | 22_12 | Cat13 | 98.2 |
| 22_12Cat13333 | 333 | FA/TEA=5:2 | / | 22_12 | Cat13 | 98.1 |

## References:

1. A. Fujii, S. Hashiguchi, N. Uematsu, T. Ikariya, R. Noyori, *J. Am. Chem. Soc.*, 1996, **118**, 2521-2522.
2. J. E. D. Martins, D. J. Morris, B. Tripathi, M. Wills. *J. Organomet. Chem.*, 2008, **693(23)**: 3527-3532.
3. L. S. Zheng, P. Phansavath, V. R.-Vidal, *Org. Lett.*, 2018, **20(17)**: 5107-5111.
4. D. J. Morris, A. M. Hayes, M. Wills. *J. Org. Chem.*, 2006, **71(18)**: 7035-7044.
5. T. Touge, H. Nara, M. Kida, K. Matsumura, Y. Kayaki, *Org. Lett.*, 2021, **23(8)**: 3070-3075.
6. T. Touge, H. Nara, M. Fujiwhara, Y. Kayaki, T. Ikariya, *J. Am. Chem. Soc.*, 2016, **138(32)**: 10084-10087.
7. V. K. Vyas, B. M. Bhanag, *Org. Lett.*, 2016, **18(24)**: 6436-6439.
8. B. He, P. Phansavath, V. R.-Vidal, *Org. Chem. Front.*, 2020, **7**.
9. J. B. -Rivera, Y. J. Xu, G. J. Clarkson, M. Wills. *Tetrahedron*, 2022, **103**: 132562.
10. A. A. Mishra, B. M. Bhanage, *ChemistrySelect*, 2019, **4**, 14032-14035.
11. S. Forshaw, A. J. Matthews, T. J. Brown, L. J. Diorazio, L. Williams, M. Wills, *Org. Lett.*, 2017, **19**, 2789-2792.
12. R. M. Betancourt, P. Phansavath, V. R. -Vidal, *Org. Lett.*, 2021, **23**, 1621-1625.
13. S. K. Gediya, V. K. Vyas, G. J. Clarkson, M. Wills, *Org. Lett.*, 2021, **23**, 7803-7807.
14. V. K. Vyas, G. J. Clarkson, M. Wills, *Org. Lett.*, 2021, **23**, 3179-3183.
15. L. S. Zheng, C. Féraud, P. Phansavath, V. R. -Vidal, *Chem. Commun.*, 2018, **54**, 283-286.
16. S. Liu, P. Cui, J. Wang, H. Zhou, Q. Liu, J. Lv, *Org. Biomol. Chem.*, 2019, **17**, 264-267.
17. A. Westermeyer, G. Guillaumot, P. Phansavath, V. R. -Vidal, *Org. Lett.*, 2020, **22**, 3911-3914.
18. J. Mao, D. C. Baker. *Org. Lett.*, 1999, **1(6)**: 841-843.
19. J. B. -Rivera, Y. J. Xu, M. Wills. *Org. Lett.*, 2020, **22(16)**: 6283-6287.
20. Z. Luo, Z. Wang, G. Sun, W. Jian, F. Jiang, B. Luan, R. Li, L. Zhang, *Org. Lett.*, 2020, **22**, 4322-4326.
21. F. Wang, T. Yang, T. Wu, L.S. Zheng, C. Yin, Y. Shi, X.Y. Ye, G.Q. Chen, X. Zhang, *J. Am. Chem. Soc.*, 2021, **143**, 2477-2483.
22. A. Kusic, M. Stephan, B. Mohar, 2013, **15(7)**: 1614-1617.
